# Supplementary material for: Dearomative Difunctionalization of Arenes via Highly Selective Radical Relay Reactions
Source: Research Square preprint supplement (doi:10.21203/rs.3.rs-3870011/v1), 2024-01-24
Supplement: Supplementary file 1 [file 9f24b861ff065eecbb3deadc.pdf]

## Supplementary Information

### **Dearomative Difunctionalization of arenes via Highly Selective Radical Relay Reactions**

Ning Lei<sup>1,4</sup>, Qian Zhang<sup>2,4</sup>, Pan Tao<sup>1</sup>, Cong Lu<sup>1</sup>, Qian Lei<sup>3</sup>, Ke Zheng<sup>1,\*</sup>

<sup>1</sup> Key Laboratory of Green Chemistry & Technology, Ministry of Education, College of Chemistry, Sichuan University, Chengdu 610064, P. R. China.

<sup>2</sup> Department of Obstetrics and Gynecology, Key Laboratory of Birth Defects and Related Diseases of Women and Children of MOE, State Key Laboratory of Biotherapy, West China Second Hospital, Sichuan University and Collaborative Innovation Center, Chengdu, P. R. China.

<sup>3</sup> Department of Respiratory and Critical Care Medicine, West China Hospital and Targeted Tracer Research and Development Laboratory, Precision Medicine Key Laboratory of Sichuan Province & Precision Medicine Center, West China Hospital, Sichuan University, Chengdu, P. R. China

<sup>4</sup> These authors contributed equally to this work

\*Correspondence author: E-mail: kzheng@scu.edu.cn (K.Z.)

## Table of content

|                                                                                                                                        |     |
|----------------------------------------------------------------------------------------------------------------------------------------|-----|
| 1 General Experiment Details .....                                                                                                     | 3   |
| 2 Standard Reaction Setup .....                                                                                                        | 3   |
| 3 Reaction Optimization and General Procedure .....                                                                                    | 4   |
| General procedure for dearomative reaction .....                                                                                       | 4   |
| 4 The Application of the Reaction .....                                                                                                | 5   |
| 4.1 General procedure for batch photoreactions. ....                                                                                   | 5   |
| 4.2 Biological verification.....                                                                                                       | 6   |
| 4.3 Attempts at stereoselectivity of the reaction .....                                                                                | 8   |
| 4.4 Unsuccessful substrate .....                                                                                                       | 11  |
| 5 Mechanistic Studies .....                                                                                                            | 11  |
| 5.1 UV-vis absorption spectrum.....                                                                                                    | 11  |
| 5.2 Control Experiments .....                                                                                                          | 12  |
| 5.2.1 Reaction in dark .....                                                                                                           | 12  |
| 5.2.2 Reaction in dark at 90 °C .....                                                                                                  | 12  |
| 5.2.3 Reaction in the presence of TEMPO as the radical scavengers (evidence for the formation of alkyl or benzyl radical via SET)..... | 13  |
| 6 Substrate Synthesis .....                                                                                                            | 15  |
| 6.1 Synthetic route to <i>N</i> -Boc-3-Arylindolin-2-one <sup>[2]</sup> .....                                                          | 15  |
| 6.2 Synthetic route to 3-Phenylbenzofuran-2(3H)-one <sup>[3]</sup> .....                                                               | 16  |
| 6.3 Synthetic route to oxazolone.....                                                                                                  | 17  |
| 6.4 Synthetic route to acids.....                                                                                                      | 17  |
| 6.5 Synthetic route to redox-active esters (RAEs) .....                                                                                | 18  |
| 7 X-ray crystallography .....                                                                                                          | 19  |
| 8 Analytical Data of Compounds .....                                                                                                   | 23  |
| 9 NMR spectra .....                                                                                                                    | 52  |
| 10 References.....                                                                                                                     | 132 |

## 1 General Experiment Details

All required fine chemicals were used directly without purification unless stated otherwise. All air and moisture sensitive reactions were carried out under nitrogen atmosphere using standard Schlenk manifold technique. All solvents were bought from *J&K Scientific* as 99.9% purity under 4 Å molecular sieves. Other commercial reagents were purchased from Adamas, TCI, Aldrich, Bidepharm and Alfa. Reactions were monitored by thin layer chromatography (TLC) using silica gel 60 F-254 plates. Flash chromatography columns were packed with 200-300 mesh silica gel. NMR-spectra were recorded on BRUKER AVANCE III HD 400 or 600 spectrometers. All spectral data was acquired at 295 K. Deuterated solvents were purchased from Adamas.  $^1\text{H}$  and  $^{13}\text{C}$  chemicals shifts ( $\delta$ ) are quoted in parts per million (ppm) against tetramethylsilane (TMS,  $\delta = 0.00$  ppm) and were internally referenced to residual  $\text{CHCl}_3$  (7.26 ppm for  $^1\text{H}$ , 77.16 ppm for  $^{13}\text{C}$ ) or DMSO (2.50 ppm for  $^1\text{H}$ , 39.52 ppm for  $^{13}\text{C}$ ).  $^{19}\text{F}$  chemicals shifts ( $\delta$ ) are quoted in parts per million (ppm) and were calibrated using absolute referencing to the  $^1\text{H}$  NMR spectrum. Coupling constants (J) are reported in Hertz (Hz) to the nearest 0.1 Hz. The following abbreviations (or combinations thereof) were used to explain multiplicities: s = singlet, d = doublet, t = triplet, br = broad, m = multiplet. High-resolution mass spectra (HRMS) were recorded on a UPLC of Thermo Q Exactive Focus. UV-Vis absorption spectra were recorded using 1 cm quartz cuvettes on a Thermo NANODROP 2000C Spectrophotometer. Fluorescence spectra were recorded using 1 cm quartz cuvettes on a HORIBA Fluoromax-4 Spectrofluorometer at 25 °C.

## 2 Standard Reaction Setup

The setup (shown below **Figure S1**) is employed to photochemical organic synthesis reaction, which is made up of separable base and reaction hole. The integrated light panel with certain wavelength can be embedded into the sliding groove of the base. Due to the hollow design, the reaction can be kept at an ideal temperature through cold or hot medium. In a typical reaction, Schlenk tube was inserted into the hole and the reaction mixture is irradiated under 10 W LEDs light with 1.0 cm distance.

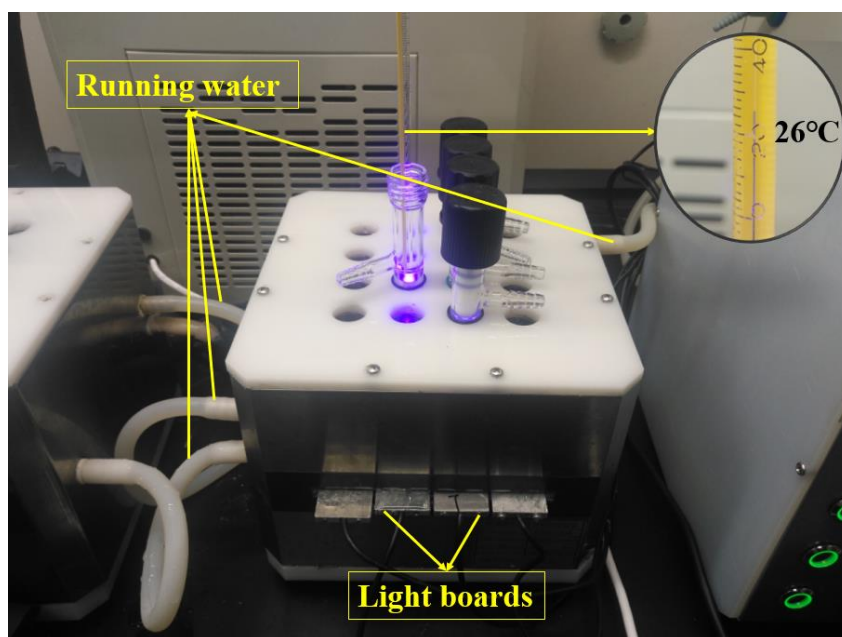

**Figure S1.** 16-hole parallel photoreactor (PhotoSyn 3.0)

### 3 Reaction Optimization and General Procedure

**Table S1.** Additional optimization of reaction conditions.<sup>[a]</sup>

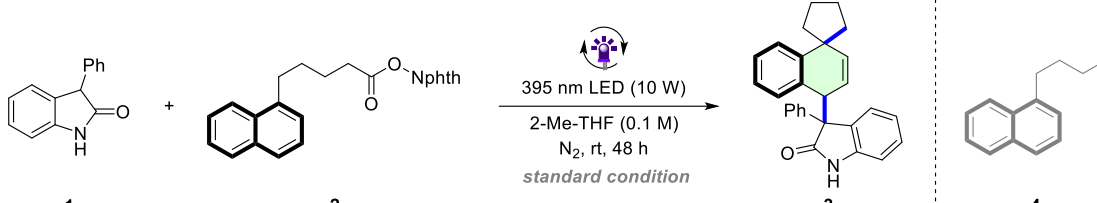

| Entry | Deviation from standard conditions                  | Yield <sup>[b]</sup> (%) 3 | Yield <sup>[b]</sup> (%) 4 |
|-------|-----------------------------------------------------|----------------------------|----------------------------|
| 1     | no change                                           | 91                         | 48                         |
| 2     | CH <sub>2</sub> Cl <sub>2</sub> instead of 2-Me-THF | trace                      | trace                      |
| 3     | THF instead of 2-Me-THF                             | 84                         | 50                         |
| 4     | CH <sub>3</sub> CN instead of 2-Me-THF              | 79                         | 54                         |
| 5     | DMSO instead of 2-Me-THF                            | 32                         | 43                         |
| 6     | 410 nm instead of 395 nm                            | 82                         | 45                         |
| 7     | 415 nm instead of 395 nm                            | 74                         | 57                         |
| 8     | 440 nm instead of 395 nm                            | trace                      | trace                      |
| 9     | 10 °C instead of 25 °C                              | 78                         | 51                         |
| 10    | 40 °C instead of 25 °C                              | 85                         | 50                         |
| 11    | 2-Me-THF (0.05) instead of 2-Me-THF (0.1)           | 61                         | 53                         |
| 12    | 2-Me-THF (0.2) instead of 2-Me-THF (0.1)            | 86                         | 50                         |
| 13    | 1.5 equiv instead of 2.0 equiv 2                    | 76                         | 46                         |
| 14    | no light, in dark                                   | 0                          | 0                          |
| 15    | no light, 60 °C                                     | 0                          | 0                          |
| 16    | Air instead of N <sub>2</sub>                       | 82                         | 48                         |

[a] Reaction conditions: **1** (0.1 mmol), **2** (0.2 mmol) in 2-Me-THF (0.1 M), irradiation with a 10 W purple LED (395 nm) under N<sub>2</sub> atmosphere at room temperature for 48 h. [b] Isolated yield.

#### General procedure for dearomative reaction

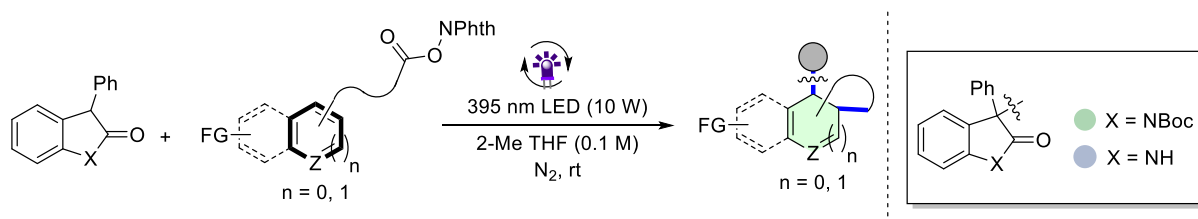

**Procedure A:** An oven-dried 10-mL Schlenk tube equipped with a stirrer was charged with the oxindoles (0.1mmol, 1.0 equiv.) and the appropriate redox-active esters (0.2 mmol, 2.0 equiv). Then, the mixture of anhydrous 2-Me-THF (0.1M) was added in glove box. The tube was sealed with a screw cap and took out from glove box. The reaction mixture was inserted into the PhotoSyn 3.0 reactor and irradiated using a 10 W LED lamp (395 nm) for 48 h. After complete consumption of oxindole, the mixture was diluted with ethyl acetate (EA, 20 mL), then washed with 2 M NaOH aqueous solution (20 mL x 3) for three times. The combined organic layers were dried with Na<sub>2</sub>SO<sub>4</sub>, filtered, and concentrated in vacuo. The crude product was purified by flash



chromatography (petroleum ether/ EA = 5/1) to afford the product.

**Procedure B:** An oven-dried 10-mL Schlenk tube equipped with a stirrer was charged with the oxindoles (0.3mmol, 1.0 equiv.) and the appropriate redox-active esters (0.6 mmol, 2.0 equiv). Then, the mixture of anhydrous 2-Me-THF (3.0 ml, 0.1M) was added in glove box. The tube was sealed with a screw cap and took out from glove box. The reaction mixture was inserted into the PhotoSyn 3.0 reactor and irradiated using a 10 W LED lamp (395 nm) for 48 h. After complete consumption of oxindole, the mixture was diluted with ethyl acetate (EA, 20 mL), then washed with 2 M NaOH aqueous solution (20 mL x 3) for three times. The combined organic layers were dried with Na<sub>2</sub>SO<sub>4</sub>, filtered, and concentrated in vacuo. The crude product was purified by flash chromatography (petroleum ether/ EA = 5/1) to afford the product.

*Note: if the NPhth was contained in product, pretreatment was employed upon completion according to reported literature. After completion, diluted with ethyl acetate (EA) (15 mL), and then washed with NaOH (10% in water) for three times (ACS Catal. 2018, 8, 9537)<sup>1</sup> Organic layers were dried with Na<sub>2</sub>SO<sub>4</sub>, filtered, and concentrated in vacuo. The crude product was purified by flash chromatography.*

## 4 The Application of the Reaction

### 4.1 General procedure for batch photoreactions.

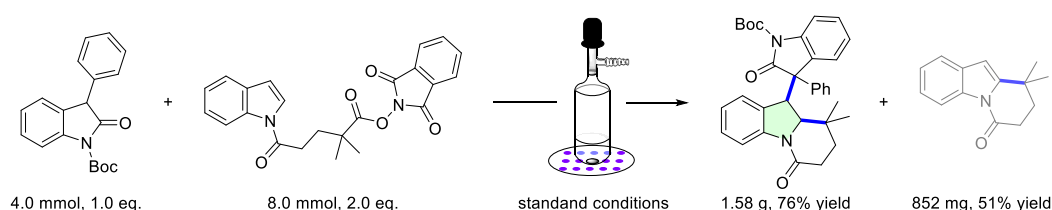

An oven-dried 100-mL Schlenk tube equipped with a stirrer was charged with the oxindole (4.0 mmol, 1.0 equiv.) and the appropriate redox-active esters (8.0 mmol, 2.0 equiv). Then, the mixture of anhydrous 2-Me-THF (0.1M) was added in glove box. The tube was sealed with a screw cap and took out from glove box. The reaction mixture was inserted into the photo-large-scale reactor and irradiated using a 60 W LED lamp (395 nm) for 48 h. After complete consumption of oxindole, the mixture was diluted with ethyl acetate (EA, 100 mL), then washed with 2 M NaOH aqueous solution (80 mL x 3) for three times. The combined organic layers were dried with Na<sub>2</sub>SO<sub>4</sub>, filtered, and concentrated in vacuo. The crude product was purified by flash chromatography (petroleum ether/EA = 5/1) to afford the product.

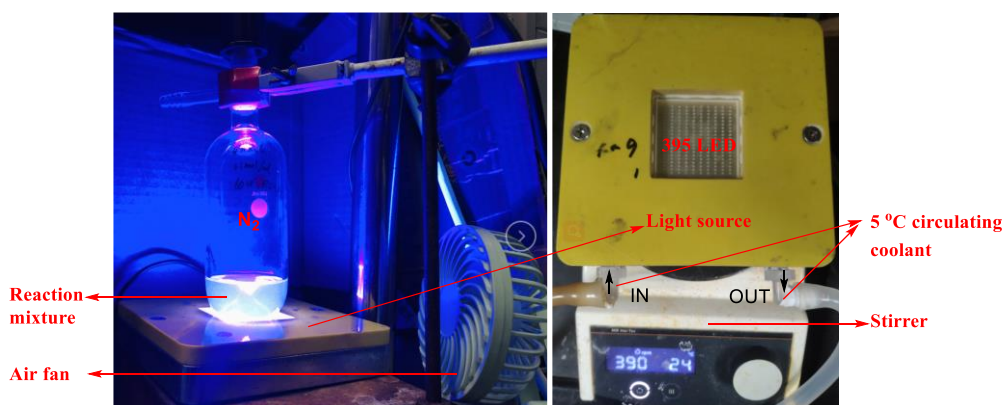

Figure S2. Photo-large-scale reactor

## 4.2 Biological verification

Cell lines and cell culture:

Murine MC38 colorectal cancer, human HCT116 colorectal cancer and human 293T renal epithelial cell line were obtained from the state key laboratory of biotherapy Sichuan university. 293T and MC38 cells were maintained in DMEM (Life Technologies, Gibco) supplemented with 10% fetal bovine serum (Life Technologies, Gibco), 100 U/mL of penicillin, and 100 mg/mL of streptomycin (Life Technologies). HCT116 cells were maintained in RPMI-1640 Medium (Life Technologies) supplemented with 10% fetal bovine serum (Life Technologies, Gibco), 100 U/mL of penicillin, and 100 mg/mL of streptomycin (Life Technologies, Gibco).

Mouse strains:

All animal studies were reviewed and approved by the Institutional Ethics Committee of Sichuan University. Female C57BL/6J (Six- to eight-week-old) mice and BALB/c nude (Six- to eight-week-old) mice were purchased from Gempharmatech Co., Ltd (Chengdu, China). These mice were housed in a specific-pathogen-free (SPF) environment with a consistent room temperature and humidity.

CCK8 assay:

Cell growth was assessed using the CCK8 assay. Briefly, HCT116 cells ( $2 \times 10^3$  cells/well) were seeded in 96-well plates. The next day, each compound tested was serially diluted in the appropriate medium, and 10  $\mu$ L of the diluted solution containing the tested compound was added to the appropriate wells of the cell plate. After 36 h, 10  $\mu$ L of CCK8 solution was added to each well and incubated for 1.5 h. The absorbance was measured at a wavelength of 450 nm with a microplate reader. The inhibition rate was calculated as follows: cell viability % =  $(A_{\text{treated}} - A_{\text{blank}}) / (A_{\text{control}} - A_{\text{blank}}) \times 100\%$ . Numerical IC<sub>50</sub> values were generated using non-linear best-fit regression analysis using Prism 6 software (GraphPad; San Diego, CA). Antitumor activity of compounds **34**, **53a** and **53b** was shown in table S2. Excitingly, compound **53b** showed the most impressive antitumor activity. We also determined the inhibitory effect of **53b** on human 293T ( $2 \times 10^3$  cells/well). **53b** exhibits a side effect on these tumor cells with 36  $\mu$ M IC<sub>50</sub> values. Compared with HCT116 cells (at 22  $\mu$ M of **53b**, the viability of normal cells exceeds 80%), 293T cells were less sensitive to **53b**, indicating that the concentration of **53b** used for tumor suppression had less effect on normal cells and no significant hepatotoxicity.

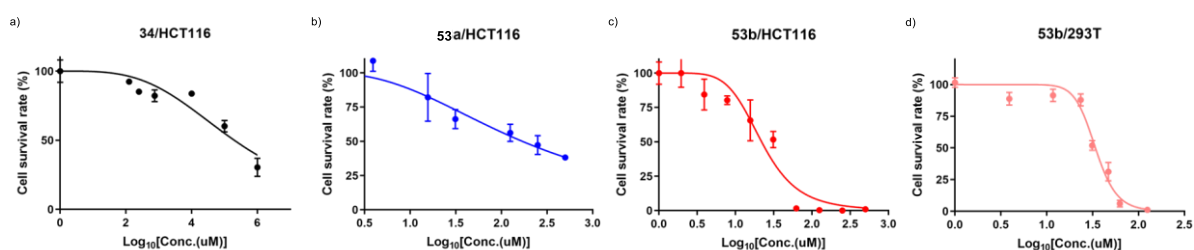

**Figure S3.** IC<sub>50</sub> values of **34**, **53a**, **53b** for HCT116 and 293T cells

Antitumor activity of HCT116

| Compounds                                | <b>34</b> | isomer <b>53a</b> | isomer <b>53b</b> |
|------------------------------------------|-----------|-------------------|-------------------|
| Antitumor activity of HCT 116 ( $\mu$ M) | >500      | >150              | $21.98 \pm 0.52$  |

**Table S2.** Antitumor activity of HCT116

Antitumor effect of **53b** in mice. Detail information of mouse experiment details: Mice were randomly

divided into two groups (n = 6). MC38 cells were prepared as  $5 \times 10^6$ /mL cell suspension under aseptic conditions. Then cells were injected subcutaneously into the right subcutaneous area of each mouse (0.1 mL). After 5 days (the average tumor size was 50 mm<sup>3</sup>), every mouse was orally administered with 0.3 mg **53b** in 0.1 mL PBS every other day in experiment group. And every mouse was orally administered with 0.1 mL PBS every two days in blank group. Tumor volume was assessed every two days. When all animals were euthanized, the tumor weight and volume were measured.

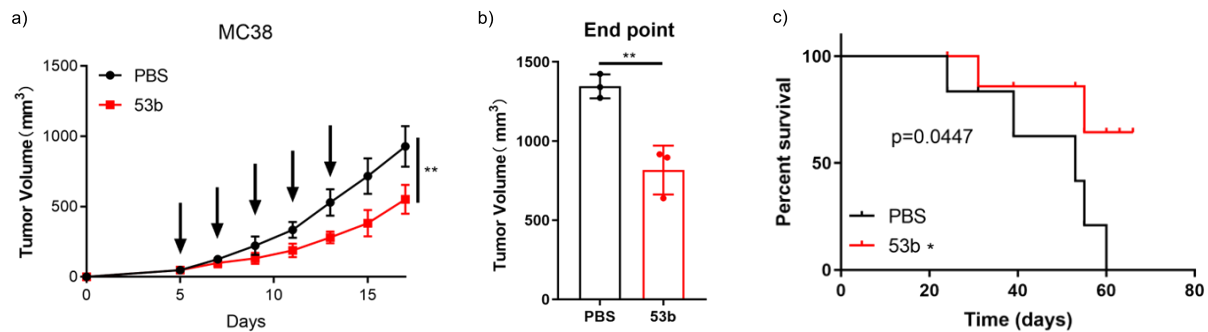

**Figure S4.** Tumor growth curves and survival cycles of mice with cancer in experimental and control groups

On the thirteen days after tumor vaccination, every mouse was orally administered with 0.3 mg **53b** in 0.1 mL PBS every other day for 5 consecutive times. Fortunately, tumor growth was significantly reduced and survival was better compared to control tumors.

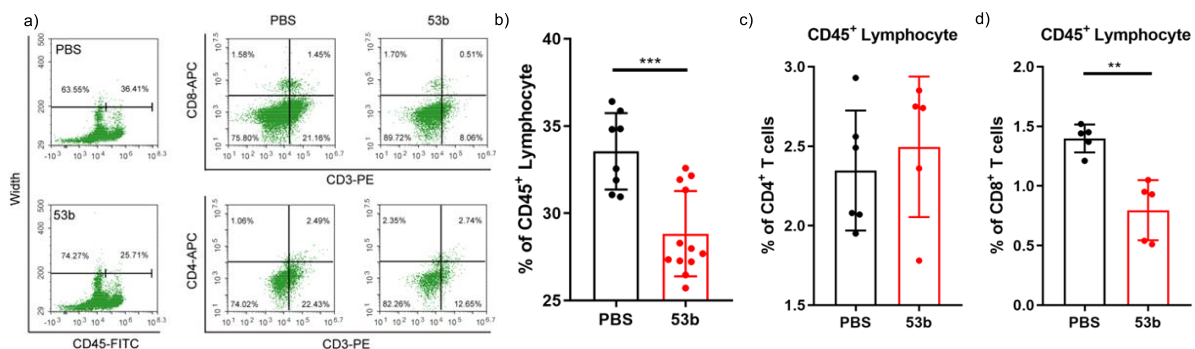

**Figure S5.** the number of tumor-infiltrating lymphocytes (TILs) after the last dose

We analyzed the number of tumor-infiltrating lymphocytes (TILs) after the last dose. We found that after **53b** treatment, the number of intratumor lymphocytes decreased, and there was no significant difference in the number of CD4<sup>+</sup> T cells in TILs, but the number of CD8<sup>+</sup> T cells decreased. Typical CD8<sup>+</sup> T cells have significant anti-tumor effects, yet despite their presence, the tumor continues to grow. At present, we have only preliminarily detected a decrease in the total number of CD8<sup>+</sup> T cells in the tumors treated with 49b. Recent studies have found that CD8<sup>+</sup> T cells include a variety of subtypes, each with different effector functions and cytotoxic potential. We speculated that **53b** may inhibit tumor growth by changing the composition of immune cells in the tumor microenvironment or the anti-tumor function.

#### **53b** toxicity analysis

We evaluated the toxicity of **53b** by immunohistochemical analysis of the kidneys and liver of tumor-bearing mice. The kidneys of sacrificed mice were fixed and paraffin embedded, and subsequently used for HE staining. HE staining showed no significant changes in the morphology and distribution of liver and kidney tissue cells in PBS group and **53b** group, indicating that **53b** had no obvious toxic effects on the liver and kidney of mice.

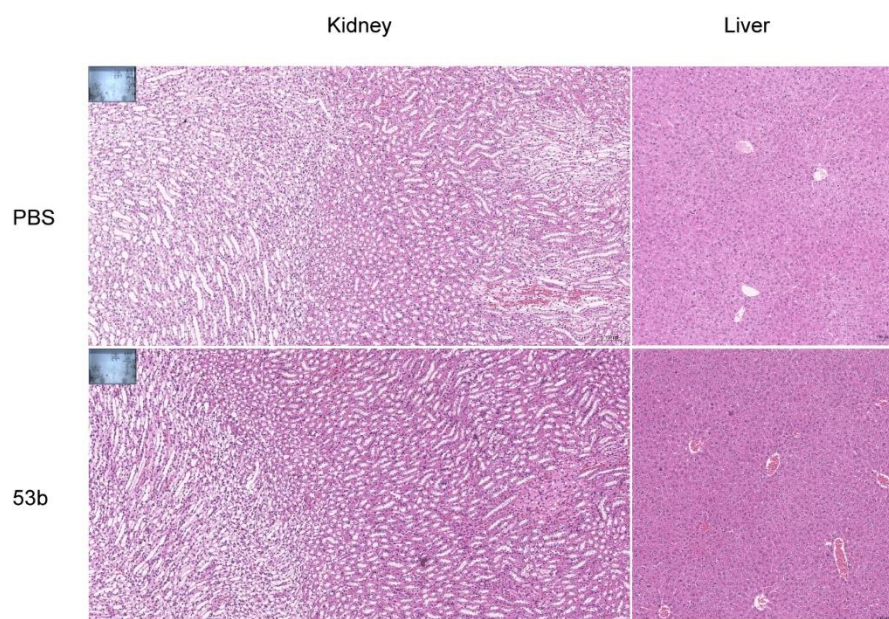

**Figure S6.** immunohistochemical analysis of the kidneys and liver of tumor-bearing mice for the toxicity of **53b**

### 4.3 Attempts at stereoselectivity of the reaction

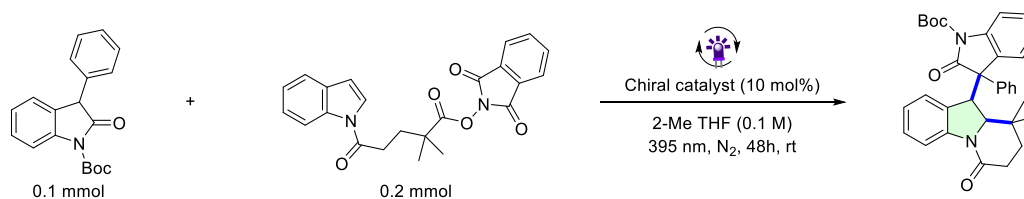

An oven-dried 10-mL Schlenk tube equipped with a stirrer was charged with the oxindoles (0.1mmol, 1.0 equiv.), chiral catalyst (10 mol%) and the appropriate redox-active esters (0.2 mmol, 2.0 equiv). Then, the mixture of anhydrous 2-Me-THF (0.1M) was added in glove box. The tube was sealed with a screw cap and took out from glove box. The reaction mixture was inserted into the PhotoSyn 3.0 reactor and irradiated using a 10W LED lamp (395 nm) for 48 h. After complete consumption of indolone, the mixture was diluted with ethyl acetate (EA, 20 mL), then washed with 2 M NaOH aqueous solution (20 mL x 3) for three times. The combined organic layers were dried with Na<sub>2</sub>SO<sub>4</sub>, filtered, and concentrated in vacuo. The crude product was purified by flash chromatography (petroleum ether/ EA = 5/1) to afford the product. The enantiomeric excess of **34** was by HPLC analysis (Chiralpak IA column, hexane/ i-PrOH, 95: 5 v/v, flow rate 1.0 mL/min,  $\lambda$  = 254 nm, 37 °C), tR1 (major) = 11.144 min, tR2 (major) = 12.834 min, tR1 (minor) = 20.699 min, tR2 (minor) = 28.202 min.

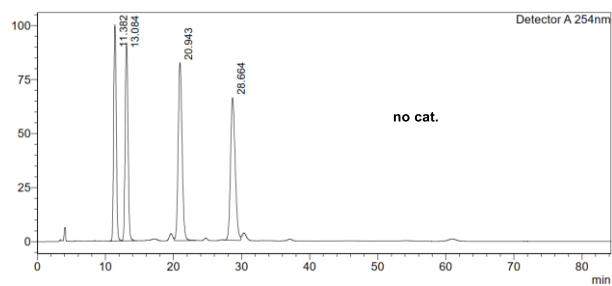

**<Peak Table>**

| Peak# | Ret. Time | Area     | Height | Area%   | Conc. | Unit | Mark |
|-------|-----------|----------|--------|---------|-------|------|------|
| 1     | 11.382    | 2677729  | 100114 | 22.732  | 0.000 |      | M    |
| 2     | 13.084    | 2698301  | 91305  | 22.906  | 0.000 |      | V M  |
| 3     | 20.943    | 3291849  | 82171  | 27.945  | 0.000 |      | M    |
| 4     | 28.664    | 3111830  | 65952  | 26.417  | 0.000 |      | M    |
| Total |           | 11779709 | 339543 | 100.000 |       |      |      |

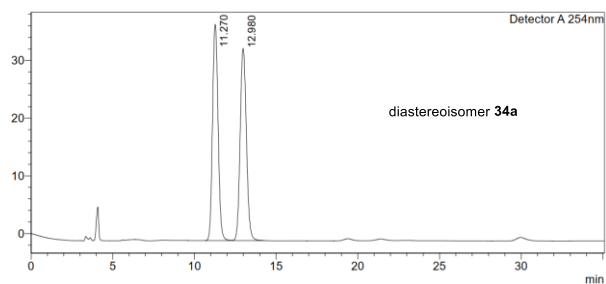

**<Peak Table>**

| Peak# | Ret. Time | Area    | Height | Area%   | Conc. | Unit | Mark |
|-------|-----------|---------|--------|---------|-------|------|------|
| 1     | 11.270    | 886185  | 37467  | 49.980  | 0.000 |      |      |
| 2     | 12.980    | 886898  | 33277  | 50.020  | 0.000 |      | V    |
| Total |           | 1773083 | 70744  | 100.000 |       |      |      |

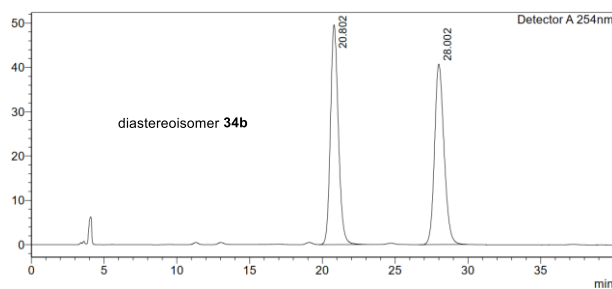

**<Peak Table>**

| Peak# | Ret. Time | Area    | Height | Area%   | Conc.  | Unit | Mark |
|-------|-----------|---------|--------|---------|--------|------|------|
| 1     | 20.802    | 1882103 | 49581  | 50.366  | 50.366 |      |      |
| 2     | 28.002    | 1854786 | 40752  | 49.634  | 49.634 |      |      |
| Total |           | 3736889 | 90333  | 100.000 |        |      |      |

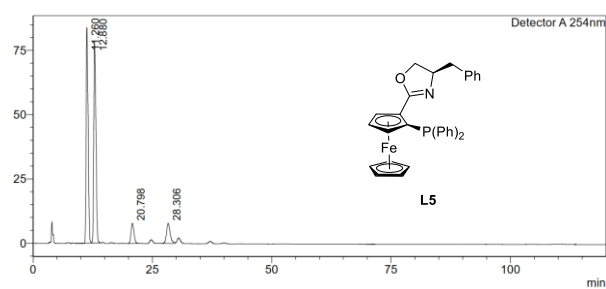

**<Peak Table>**

| Peak# | Ret. Time | Area    | Height | Area%   | Conc.  | Unit | Mark |
|-------|-----------|---------|--------|---------|--------|------|------|
| 1     | 11.260    | 2409684 | 83733  | 42.651  | 42.651 |      | M    |
| 2     | 12.880    | 2490130 | 78466  | 44.075  | 44.075 |      | V M  |
| 3     | 20.798    | 328398  | 7796   | 5.813   | 5.813  |      |      |
| 4     | 28.306    | 421601  | 7865   | 7.462   | 7.462  |      |      |
| Total |           | 5649813 | 177860 | 100.000 |        |      |      |

**Figure S7.** HPLC analysis of **34**, isomer **34a**, isomer **34b**

|                                                                                                                                                                                                                        |                                                                                                             |                                                                                        |                                                                                                        |                                                                                      |                                                                                       |                                                                                       |           |
|------------------------------------------------------------------------------------------------------------------------------------------------------------------------------------------------------------------------|-------------------------------------------------------------------------------------------------------------|----------------------------------------------------------------------------------------|--------------------------------------------------------------------------------------------------------|--------------------------------------------------------------------------------------|---------------------------------------------------------------------------------------|---------------------------------------------------------------------------------------|-----------|
| 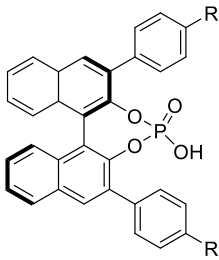                                                                                                                                      |                            |      |                     |                                                                                      |                                                                                       |                                                                                       |           |
| <b>CPA 1</b> R = CF <sub>3</sub><br><b>CPA 2</b> R = <sup>t</sup> Bu                                                                                                                                                   | <b>CPA 3</b> R = CF <sub>3</sub><br><b>CPA 4</b> R = Me                                                     | <b>CPA 5</b> R = CH <sub>3</sub><br><b>CPA 6</b> R = <i>ipr</i><br><b>CPA 7</b> R = Cy | <b>CPA 8</b>                                                                                           |                                                                                      |                                                                                       |                                                                                       |           |
|                                                                                                                                       |                            |      |                     |                                                                                      |                                                                                       |                                                                                       |           |
| <b>CPA 9</b> R = 1- naphthyl<br><b>CPA 10</b> R = 2- naphthyl<br><b>CPA 11</b> R = 9- anthryl<br><b>CPA 12</b> R = 2- perylene<br><b>CPA 13</b> R = Si(Ph) <sub>3</sub>                                                | <b>CPA 14</b> R = CF <sub>3</sub><br><b>CPA 15</b> R = <sup>t</sup> Bu<br><b>CPA 16</b> R = NO <sub>2</sub> | <b>CPA 17</b> R = CF <sub>3</sub><br><b>CPA 18</b> R = Me                              | <b>CPA 19</b> R = CH <sub>3</sub><br><b>CPA 20</b> R = <i>ipr</i><br><b>CPA 21</b> R = Cy              |                                                                                      |                                                                                       |                                                                                       |           |
|                                                                                                                                     |                          |    |                   |                                                                                      |                                                                                       |                                                                                       |           |
| <b>CPA 22</b> R = 1- naphthyl<br><b>CPA 23</b> R = 2- naphthyl<br><b>CPA 24</b> R = 9- anthryl<br><b>CPA 25</b> R = 2- perylene<br><b>CPA 26</b> R = Si(Ph) <sub>3</sub><br><b>CPA 27</b> R = 3-trifluoromethyl phenyl |                                                                                                             | <b>CPA 28</b>                                                                          | <br><b>CPA 29</b> |                                                                                      |                                                                                       |                                                                                       |           |
|                                                                                                                                     |                          |     |                     |  |  |  |           |
| <b>L1</b>                                                                                                                                                                                                              | <b>L2</b>                                                                                                   | <b>L3</b>                                                                              | <b>L4</b>                                                                                              | <b>L5</b>                                                                            | <b>L6</b>                                                                             | <b>L6</b>                                                                             |           |
| product 3                                                                                                                                                                                                              | no cat.                                                                                                     | <b>L1</b>                                                                              | <b>L2</b>                                                                                              | <b>L3</b>                                                                            | <b>L4</b>                                                                             | <b>L5</b>                                                                             | <b>L6</b> |
| Yield (%)                                                                                                                                                                                                              | 88                                                                                                          | 78                                                                                     | 68                                                                                                     | 53                                                                                   | 84                                                                                    | 55                                                                                    | 60        |
| <i>d.r.</i>                                                                                                                                                                                                            | 1:1                                                                                                         | 4:1                                                                                    | 4:1                                                                                                    | 7:1                                                                                  | 4:1                                                                                   | 7:1                                                                                   | 1:3       |



## 4.4 Unsuccessful substrate

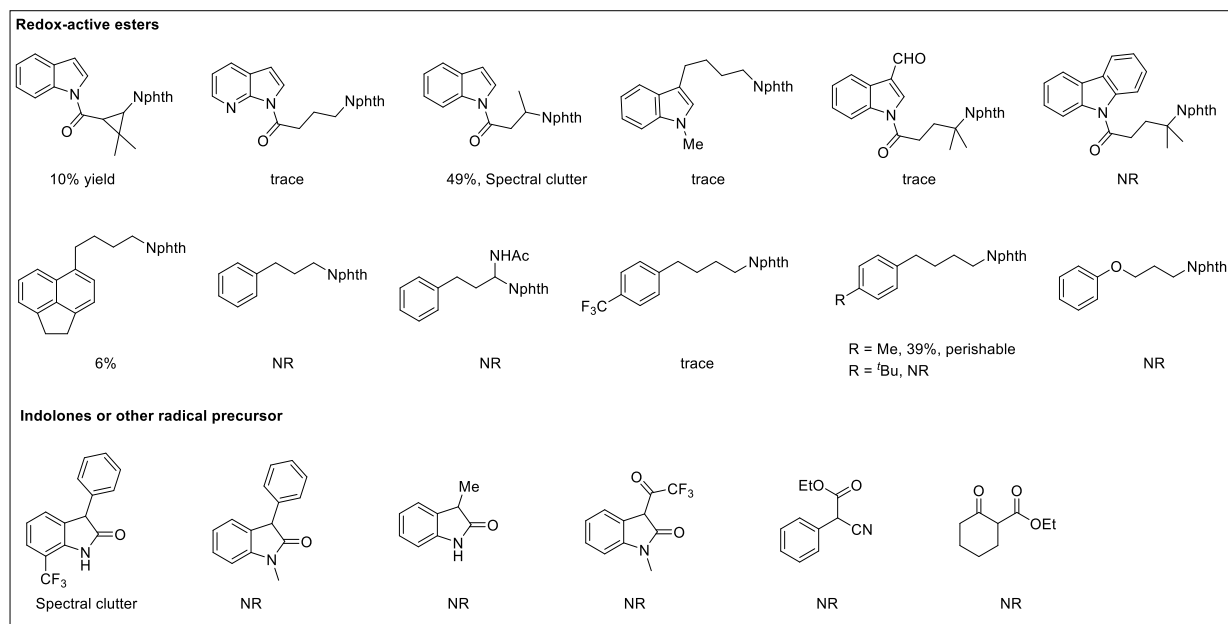

Figure S9. Unsuccessful substrates

## 5 Mechanistic Studies

### 5.1 UV-vis absorption spectrum

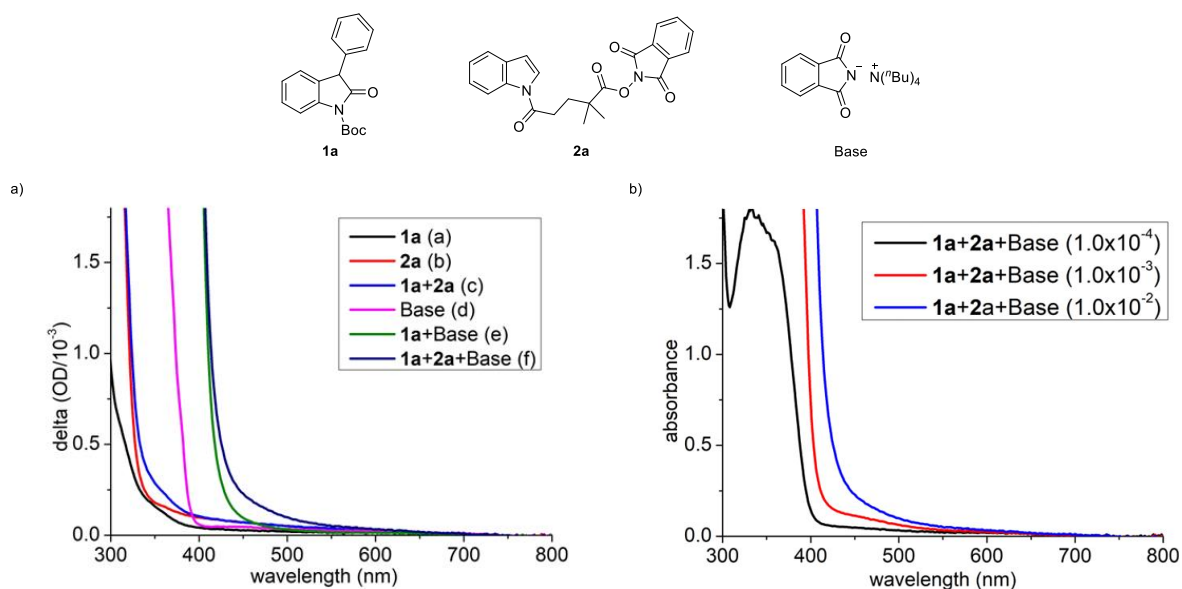

Figure S10. UV- Vis absorption spectra of Indolone **1a**, NHPI ester **2a** and base with 2-Me-THF (0.01 M)

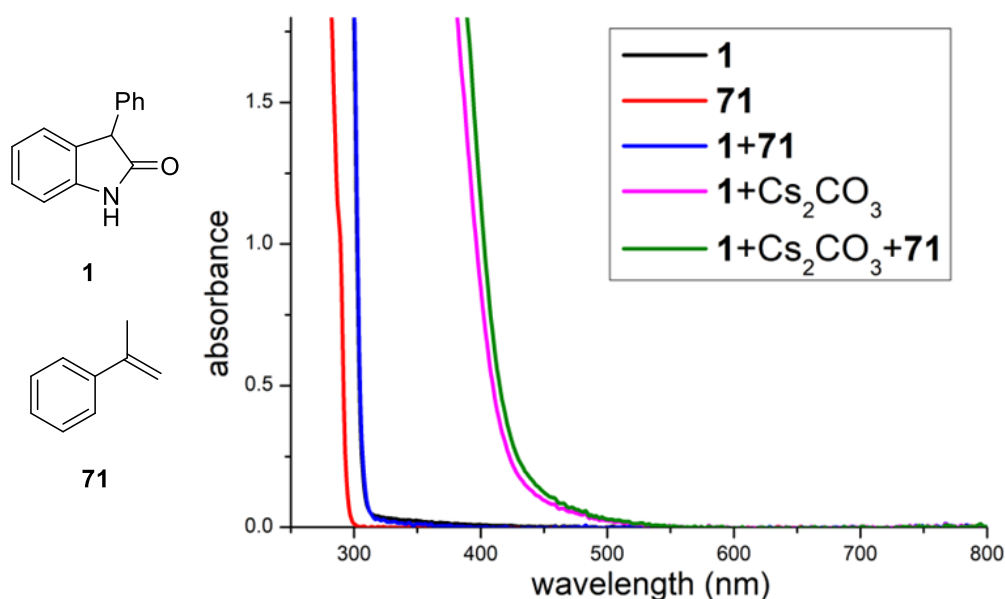

**Figure 11.** UV- Vis absorption spectra of **1**, **71** and  $\text{Cs}_2\text{CO}_3$  with  $\text{CH}_3\text{CN}:\text{H}_2\text{O} = 9:1$  (V: V) (0.01 M)

## 5.2 Control Experiments

### 5.2.1 Reaction in dark

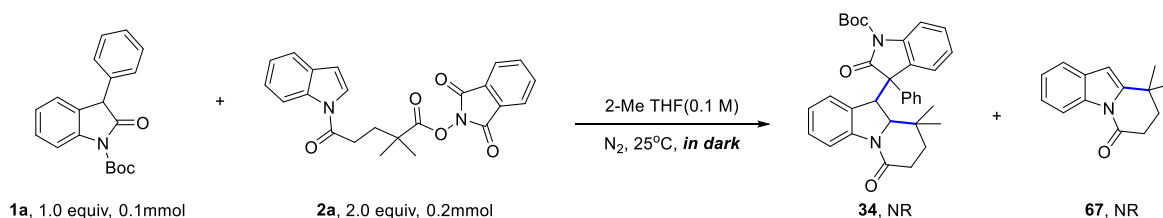

An oven-dried 10-mL Schlenk tube equipped with a stirrer was charged with the indolone **1a** (0.1mmol, 1.0 equiv.) and RAE **2a** (0.2 mmol, 2.0 equiv). Then, the solvent anhydrous 2-Me-THF (0.1M) was added in glove box. The tube was sealed with a screw cap and took out form glove box, and stirred in the dark for 24 h. TLC analysis revealed that no reaction occurred.

### 5.2.2 Reaction in dark at 90 °C

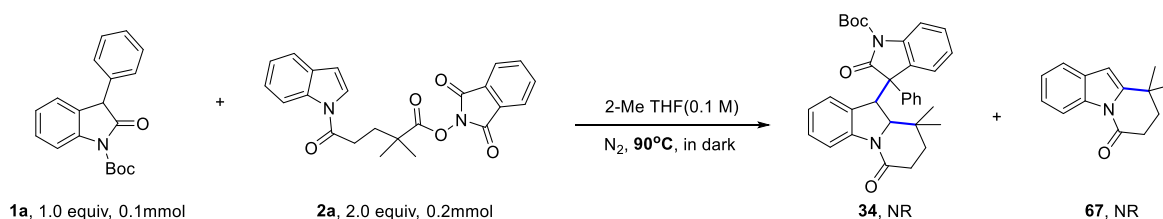

An oven-dried 10-mL Schlenk tube equipped with a stirrer was charged with the indolone **1a** (0.1mmol, 1.0 equiv) and RAE **2a** (0.2 mmol, 2.0 equiv). Then, the solvent anhydrous 2-Me-THF (0.1M) was added in glove



box. The tube was sealed with a screw cap and took out from glove box, and stirred in the dark for at 90 °C for 24 h. TLC analysis revealed that no reaction occurred.

### 5.2.3 Reaction in the presence of TEMPO as the radical scavengers (evidence for the formation of alkyl or benzyl radical via SET)

To verify radical mechanism of this transformation, the radical trapping experiment was carried out as shown in below. When 2.5 equiv. TEMPO was added to this system, no cross-coupling product **3** was detected and the radical trap product **68** were isolated in middle yield, providing direct evidence for the formation of a transient benzyl radical by SET process as a key intermediate in the catalytic cycle. Meanwhile, the amination product **69** was also isolated in 38% yield.

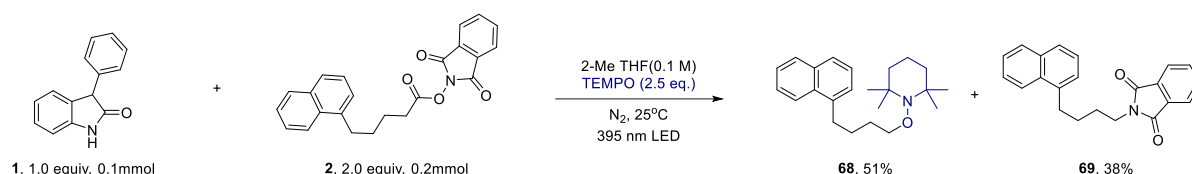

An oven-dried 10-mL Schlenk tube equipped with a stirrer was charged with the indolone **1** (0.1 mmol, 1.0 equiv), RAE **2** (0.2 mmol, 2.0 equiv) and TEMPO (0.25 mmol, 2.5 equiv). Then, the solvent anhydrous 2-Me-THF (0.1 M) was added in glove box. The tube was sealed with a screw cap and took out from glove box. The reaction mixture was inserted into the PhotoSyn 3.0 reactor and irradiated using a 10W LED lamp (395 nm) for 48 h. Then the mixture was diluted with 1 N NaOH aqueous solution (15 mL), then extracted with ethyl acetate (EA) for three times. The combined organic layers were dried with Na<sub>2</sub>SO<sub>4</sub>, filtered, and concentrated in vacuo. TLC analysis revealed that no radical-cross-coupling product **3** was formed. Purification of the crude mixture by flash column chromatography on silica gel (petroleum ether/ ethyl acetate 20: 1) provided adduct **68** (34.8 mg, 51%) and **69** (25.0 mg, 38%).

#### 2,2,6,6-tetramethyl-1-(4-(naphthalen-1-yl)butoxy)piperidine (**68**)

**Physical state:** white solid.

**<sup>1</sup>H NMR (400 MHz, CDCl<sub>3</sub>)** δ 8.06 (d, *J* = 8.2 Hz, 1H), 7.88 (dd, *J* = 7.5, 2.1 Hz, 1H), 7.74 (d, *J* = 8.1 Hz, 1H), 7.57 – 7.46 (m, 2H), 7.45 – 7.39 (m, 1H), 7.35 (d, *J* = 7.0 Hz, 1H), 3.14 (q, *J* = 4.5, 4.0 Hz, 2H), 2.44 (t, *J* = 6.6 Hz, 2H), 1.94 – 1.80 (m, 4H), 1.79 – 1.37 (m, 7H), 1.11 (d, *J* = 35.2 Hz, 12H).

**<sup>13</sup>C NMR (101 MHz, CDCl<sub>3</sub>)** δ 138.19, 133.92, 131.84, 128.79, 126.65, 125.98, 125.78, 125.54, 125.45, 123.79, 59.93, 38.99, 32.92, 32.82, 32.02, 30.51, 25.41, 20.54, 16.99.

**HRMS (ESI)** calcd for C<sub>23</sub>H<sub>33</sub>NO (M+H)<sup>+</sup>: 340.2635, found: 340.2635.

#### 2-(4-(naphthalen-1-yl)butyl)isoindoline-1,3-dione (**69**)

**Physical state:** white solid.

**<sup>1</sup>H NMR (400 MHz, CDCl<sub>3</sub>)** δ 8.07 (d, *J* = 7.9 Hz, 1H), 7.94 – 7.86 (m, 3H), 7.80 (dd, *J* = 5.5, 3.1 Hz, 2H), 7.75 (d, *J* = 8.1 Hz, 1H), 7.53 (dddd, *J* = 19.8, 8.0, 6.8, 1.4 Hz, 2H), 7.47 – 7.40 (m, 1H), 7.37 (d, *J* = 5.7 Hz, 1H), 3.16 (d, *J* = 7.1 Hz, 2H), 2.81 – 2.69 (m, 2H), 2.04 – 1.90 (m, 4H).

**<sup>13</sup>C NMR (101 MHz, CDCl<sub>3</sub>)** δ 169.50, 161.99, 137.79, 134.76, 133.93, 131.81, 128.95, 128.82, 126.76, 126.04, 125.87, 125.57, 125.49, 123.98, 123.73, 32.55, 30.91, 29.80, 24.72.

**HRMS (ESI)** calcd for C<sub>22</sub>H<sub>19</sub>NO<sub>2</sub> (M+H)<sup>+</sup>: 330.1489, found: 330.1490.

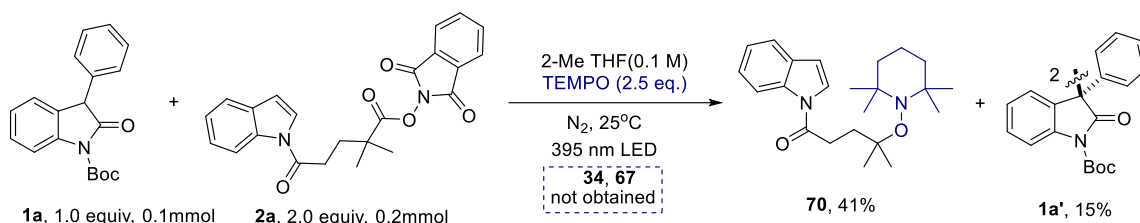

An oven-dried 10-mL Schlenk tube equipped with a stirrer was charged with the indolone **1a** (0.1 mmol, 1.0 equiv), RAE **2a** (0.2 mmol, 2.0 equiv) and TEMPO (0.25 mmol, 2.5 equiv). Then, the solvent anhydrous 2-Me-THF (0.1 M) was added in glove box. The tube was sealed with a screw cap and took out form glove box. The reaction mixture was inserted into the PhotoSyn 3.0 reactor and irradiated using a 10 W LED lamp (395 nm) for 48 h. Then the mixture was diluted with 1 N NaOH aqueous solution (15 mL), then extracted with ethyl acetate (EA) for three times. The combined organic layers were dried with Na<sub>2</sub>SO<sub>4</sub>, filtered, and concentrated in vacuo. TLC analysis revealed that no radical-cross-coupling product **34** was formed. Purification of the crude mixture by flash column chromatography on silica gel (petroleum ether/ ethyl acetate 20: 1) provided adduct **70** (30.1 mg, 41%) and **1a'** (9.2 mg, 15%).

#### 1-(1H-indol-1-yl)-4-methyl-4-((2,2,6,6-tetramethylpiperidin-1-yl) oxy) pentan-1-one (**70**)

**Physical state:** white solid.

**<sup>1</sup>H NMR (400 MHz, CDCl<sub>3</sub>)** δ 8.46 (d, *J* = 8.2 Hz, 1H), 7.67 (d, *J* = 3.8 Hz, 1H), 7.55 (d, *J* = 7.6 Hz, 1H), 7.33 (t, *J* = 7.7 Hz, 1H), 7.26 (t, *J* = 7.0 Hz, 1H), 6.63 (d, *J* = 3.7 Hz, 1H), 3.08 – 2.89 (m, 2H), 2.21 – 2.03 (m, 2H), 1.87 – 1.49 (m, 6H), 1.37 (s, 6H), 1.18 (s, 6H), 1.07 (s, 6H).

**<sup>13</sup>C NMR (101 MHz, CDCl<sub>3</sub>)** δ 176.38, 171.62, 135.63, 130.49, 125.42, 125.01, 123.64, 120.77, 116.64, 109.32, 60.25, 42.23, 39.07, 35.78, 32.59, 31.98, 25.79, 20.77, 16.93.

**HRMS (ESI)** calcd for C<sub>23</sub>H<sub>34</sub>N<sub>2</sub>O<sub>2</sub> (M+Na)<sup>+</sup>: 371.2693, found: 371.2694.

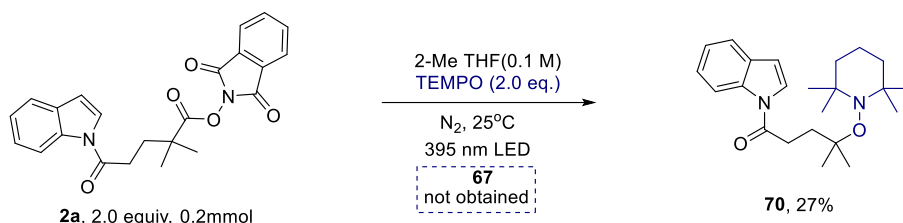

An oven-dried 10-mL Schlenk tube equipped with a stirrer was charged with RAE **2a** (0.2 mmol, 1.0 equiv) and TEMPO (0.40 mmol, 2.0 equiv). Then, the solvent anhydrous 2-Me-THF (0.1 M) was added in glove box. The tube was sealed with a screw cap and took out form glove box. The reaction mixture was inserted into the PhotoSyn 3.0 reactor and irradiated using a 10W LED lamp (395 nm) for 6 days. Then the mixture was diluted with 1 N NaOH aqueous solution (15 mL), then extracted with ethyl acetate (EA) for three times. The combined organic layers were dried with Na<sub>2</sub>SO<sub>4</sub>, filtered, and concentrated in vacuo. TLC analysis revealed that no cyclization product **67** was formed. Purification of the crude mixture by flash column chromatography on silica gel (petroleum ether/ ethyl acetate 20: 1) provided adduct **70** (10.0 mg, 27%) and recovered **2a** (67%).

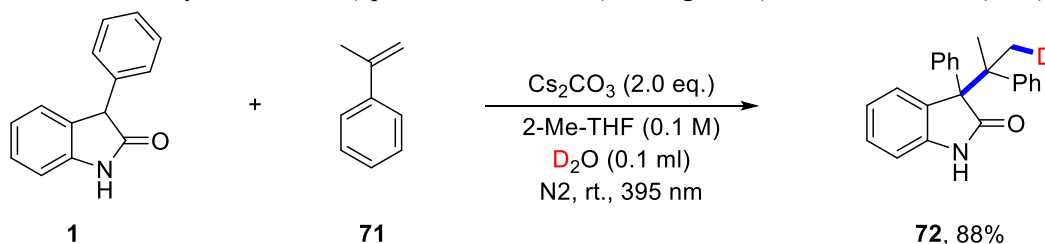

An oven-dried 10-mL Schlenk tube equipped with a stirrer was charged with the indolone **1** (0.1 mmol, 1.0 equiv), 2-Phenyl-1-propene **71** (0.2 mmol, 2.0 equiv) and Cs<sub>2</sub>CO<sub>3</sub> (0.2mmol, 2.0 equiv). Then, the solvent anhydrous 2-Me-THF (0.1 M) and D<sub>2</sub>O (0.1ml) were added in glove box. The tube was sealed with a screw cap and took out form glove box. The reaction mixture was inserted into the PhotoSyn 3.0 reactor and irradiated using a 10W LED lamp (395 nm) for 24 h. Then the mixture was diluted with water, then extracted with ethyl acetate (EA) for three times. The combined organic layers were dried with Na<sub>2</sub>SO<sub>4</sub>, filtered, and concentrated in vacuo. Purification of the crude mixture by flash column chromatography on silica gel (petroleum ether/ ethyl acetate 5: 1) provided adduct **72** (28.9 mg, 88%).

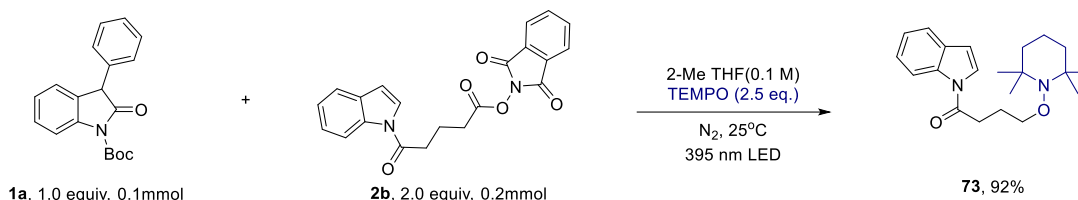

An oven-dried 10-mL Schlenk tube equipped with a stirrer was charged with the indolone **1a** (0.1 mmol, 1.0 equiv), RAE **2b** (0.2 mmol, 2.0 equiv) and TEMPO (0.25 mmol, 2.5 equiv). Then, the solvent anhydrous 2-Me-THF (0.1 M) was added in glove box. The tube was sealed with a screw cap and took out form glove box. The reaction mixture was inserted into the PhotoSyn 3.0 reactor and irradiated using a 10W LED lamp (395 nm) for 48 h. Then the mixture was diluted with 1 N NaOH aqueous solution (15 mL), then extracted with ethyl acetate (EA) for three times. The combined organic layers were dried with Na<sub>2</sub>SO<sub>4</sub>, filtered, and concentrated in vacuo. TLC analysis revealed that no radical-cross-coupling product **28** was formed. Purification of the crude mixture by flash column chromatography on silica gel (petroleum ether/ ethyl acetate 20: 1) provided adduct **73** (60.7 mg, 41%).

#### 1-(1H-indol-1-yl)-4-((2,2,6,6-tetramethylpiperidin-1-yl)oxy)butan-1-one (**73**)

**Physical state:** white solid.

**<sup>1</sup>H NMR (400 MHz, CDCl<sub>3</sub>)** δ 8.43 (d, J = 8.2 Hz, 1H), 7.49 (d, J = 3.8 Hz, 1H), 7.33 (t, J = 7.1 Hz, 1H), 7.30 – 7.22 (m, 1H), 6.63 (d, J = 3.8 Hz, 1H), 3.28 (t, J = 6.7 Hz, 2H), 2.89 (t, J = 6.6 Hz, 2H), 1.75 – 1.58 (m, 1H), 1.53 (m, 2H), 1.40 (m, 1H), 1.13 (d, J = 24.4 Hz, 12H).

**<sup>13</sup>C NMR (101 MHz, CDCl<sub>3</sub>)** δ 169.70, 135.65, 130.35, 125.13, 124.40, 123.70, 120.87, 116.55, 109.42, 60.17, 39.08, 31.95, 30.75, 27.06, 20.52, 16.96.

**HRMS (ESI)** calcd for C<sub>21</sub>H<sub>30</sub>N<sub>2</sub>O<sub>2</sub> (M+Na)<sup>+</sup>: 343.2380, found: 343.2382.

## 6 Substrate Synthesis

### 6.1 Synthetic route to *N*-Boc-3-Arylindolin-2-one <sup>[2]</sup>

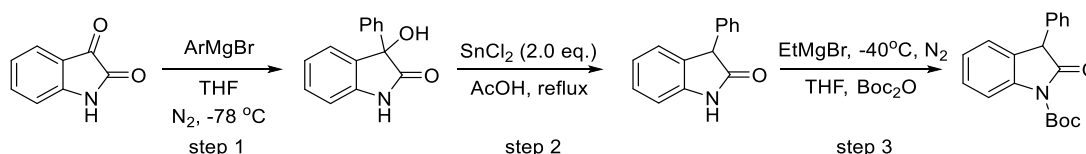

According to the reported literature

Step 1: (1) Preparation for Aryl Grignard reagent: a 50 mL round-bottomed flask was equipped with a magnetic stir bar, to a stirring mixture of magnesium (1.2 equiv) and a small piece of iodine in dry THF (1.0 M). A solution of aryl bromide (1.0 equiv) in 2 mL of dry THF was added dropwise to the round-bottom flask and stirred for 3

h under N<sub>2</sub> atmosphere. After the formation of Grignard reagent (colorless to brownish-green), the reaction mixture was cooled to 0 °C.

(2) Another 50 mL round-bottomed flask was equipped with a magnetic stir bar, to a stirring isatin (10.0 mmol) in dried THF (20 mL), then cooled to -40 °C for 30 min. Previously obtained Grignard reagent in THF (2.0 equiv) was added dropwise to the reaction mixture under N<sub>2</sub> atmosphere, then the mixture was allowed to warm to room temperature and stirred until isatin was consumed completely. The reaction mixture was diluted with ether, cooled in an ice-bath, and then quenched with HCl (2 M). The aqueous layer was extracted with ether, combined organic layers and washed with water and brine, then dried over with Na<sub>2</sub>SO<sub>4</sub>, filtered and concentrated in vacuo, 3-hydroxy-3-arylindolin-2-one was obtained as solid and no purification was necessary for further transformation.

Step 2: A 50 mL round-bottomed flask was equipped with a magnetic stir bar, to a stirring the crude product (5.0 mmol) obtained above in AcOH/ HCl (30 mL/ 2 ml), then SnCl<sub>2</sub> (10.0 mmol) was added at room temperature. The mixture was heated to reflux, monitored by TLC until the completely consumption of the starting material. Next, the solution was cooled to room temperature, concentrated in vacuo, and diluted with EtOAc. The residue was washed with water (3x), saturated aqueous NaHCO<sub>3</sub>, and brine. The organic layer was dried with anhydrous Na<sub>2</sub>SO<sub>4</sub>, filtered and concentrated in vacuo. The residue was recrystallized (EtOAc/PE) to afford corresponding product as white solid.

Step 3: a 25 mL round-bottomed flask was equipped with a magnetic stir bar, put the product obtained above (2.0 mmol) into flask and seal, and then replaced with nitrogen (3x), THF (8 mL) was added and stirred under 0 °C for 30 min. EtMgBr Grignard reagent in THF (2.0 equiv) was added dropwise to the reaction mixture, then stirred for 2h under 0°C. A solution of Boc<sub>2</sub>O (1.2 equiv) in 5 mL of dry THF was added dropwise to the round-bottom flask and stirred for 30 min. Then stirred at room temperature for 3h. The residue was quenched with water, then washed with DCM, dried over with Na<sub>2</sub>SO<sub>4</sub>, filtered and concentrated in vacuo. The crude product was purified by flash column chromatography (PE/ EtOAc, 10:1) to afford N-Boc-3-Arylindolin-2-one.

## 6.2 Synthetic route to 3-Phenylbenzofuran-2(3H)-one <sup>[3]</sup>

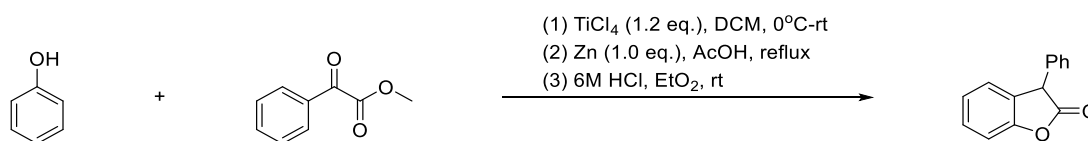

(1) A 50 mL round-bottomed flask was equipped with a magnetic stir bar, to stirring phenol (5.0 mmol, 470 mg) in DCM (20 mL) at room temperature, then TiCl<sub>4</sub> (0.66 mL, 6.0 mmol, 1.2 equiv,) was added dropwise. Methyl phenylglyoxylate (0.54 mL, 6.0 mmol, 1.2 equiv) was added dropwise to the reaction mixture at 0 °C, the mixture was allowed to warm to room temperature and stirred for 2 h.

(2) AcOH (3.0 mL) and Zn (325 mg, 5.0mmol, 1.0 equiv,) were added, and the mixture heated at reflux for 3 h.

(3) The reaction mixture was filtrated in vacuo, the residue was added 6 M HCl (2 mL), Et<sub>2</sub>O (3 mL) and stirred at room temperature for 3 h. After the reaction was completed, the reaction mixture was extracted with EtOAc (3x) and the combined organic phases were dried over with Na<sub>2</sub>SO<sub>4</sub>, filtered and concentrated in vacuo. The crude product was purified by flash column chromatography (PE/EtOAc, 50:1) to afford 3-Phenylbenzofuran-2(3H)-one (*Org. Chem.Front.* **2019**, 6, 3969-3972).

### 6.3 Synthetic route to oxazolone

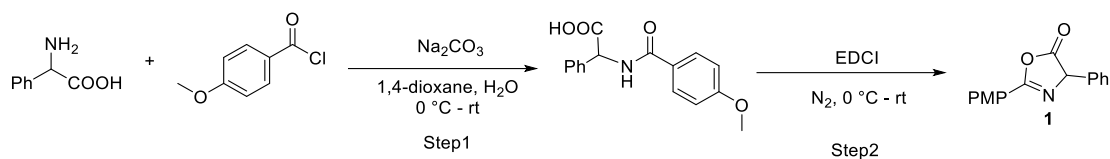

Step 1: 2-Amino-2-phenylacetic acid (1.0 equiv) and  $\text{Na}_2\text{CO}_3$  (3.4 equiv) was added to round bottom flask equipped with a stirring bar. The reaction mixture was dissolved in 1,4-dioxane (0.50 M) and  $\text{H}_2\text{O}$  (0.18 M). After cooled to 0 °C, 4-methoxybenzoyl chloride (1.1 equiv) was added dropwise. The cooling bath was removed and the reaction mixture was stirred at room temperature. After 1 h, the reaction mixture was diluted with  $\text{H}_2\text{O}$  and  $\text{CH}_2\text{Cl}_2$ . The aqueous layer was separated, and 1 N HCl aq was added to it until cloudy. It was extracted twice with EA, the combined organic layer was dried over  $\text{Na}_2\text{SO}_4$ , filtered and concentrated to obtain the crude product. The crude product was purified by flash chromatography (petroleum ether/EA = 5/1) to afford the product.

Step 2: To a solution of 2-(4-methoxybenzamido)-2-phenylacetic acid in  $\text{CH}_2\text{Cl}_2$  (0.072 M) under argon atmosphere was added 1-(3-dimethylaminopropyl)-3-ethylcarbodiimide hydrochloride (1.2 equiv) at 0 °C. The cooling bath was removed and the reaction mixture was stirred at room temperature. After stirring for 1 h, the reaction mixture was washed with  $\text{H}_2\text{O}$ , sat.  $\text{NaHCO}_3$  aq and brine. The combined organic layers were dried over  $\text{Na}_2\text{SO}_4$  and filtered. After removal of solvent under reduced pressure. The crude product was purified by flash chromatography (*Org. Lett.* **2020**, 22, 4164)<sup>17</sup>.

### 6.4 Synthetic route to acids

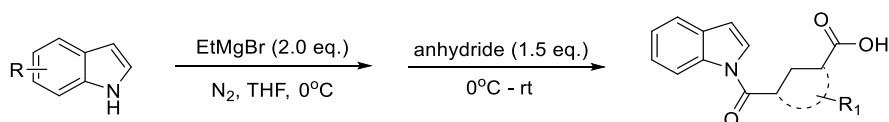

A 25 mL round-bottomed flask was equipped with a magnetic stir bar, put indoles (5.0 mmol) into flask and seal, and then replaced with nitrogen (3x), THF (8 mL) was added and stirred under 0 °C for 30 min. EtMgBr Grignard reagent in THF (2.0 equiv) was added dropwise to the reaction mixture, then stirred for 2h under 0 °C. A solution of anhydride (1.5 equiv) in 5 mL of dry THF was added dropwise to the round-bottom flask and stirred for 30 min, then stirred at room temperature for 3h. The residue was quenched with 2N HCl, then washed with DCM, dried over with  $\text{Na}_2\text{SO}_4$ , filtered and concentrated in vacuo. The crude product was purified by flash column chromatography (PE/ EtOAc, 5:1) to afford desired products.

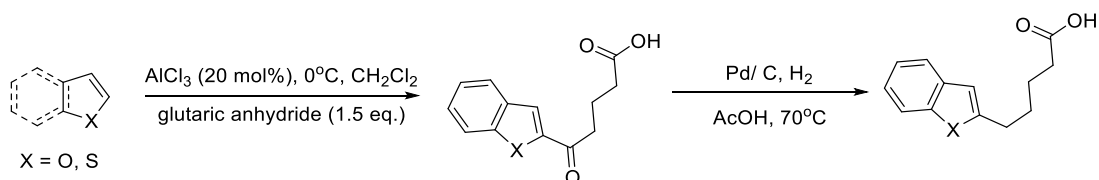

Under a nitrogen atmosphere, a mixture of anhydrous aluminum chloride (8.0 g, 60 mmol) in anhydrous dichloromethane (50 mL) was stirred and cooled to -10 °C. A solution of glutaric anhydride (4.8 g, 42 mmol) and substituted arenes (40 mmol) was added dropwise to the cooled mixture with stirring. After 5h at -10 °C, the reaction mixture was poured into ice-cooled 3.5 M HCl (100 mL), and the product

was extracted into dichloromethane. The extract was washed with cold saturated aqueous sodium carbonate, and the aqueous layers were acidified and extracted with dichloromethane. The extract was washed with brine, dried over anhydrous sodium sulfate and evaporated in vacuo without further purification to give intermediate acids as white crystal.

To a three-necked flask was added compound (10 mmol), 30 mL AcOH and Pd/C (10%) and stirred under H<sub>2</sub> balloon atmosphere in 70 °C. The reaction was monitored by TLC. When the reaction was completed, the reaction mixture was filtered through a Celite pad which was washed with acetic acid, then concentrated in vacuo to give the desired acid.

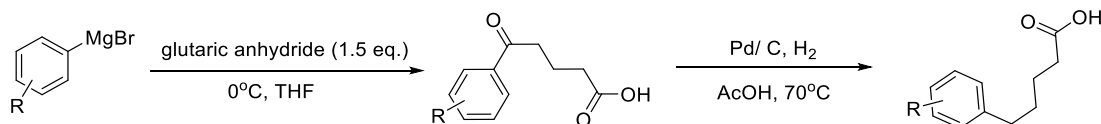

Preparation for Aryl Grignard reagent: same as above 6.1 (Step 1)

Under a nitrogen atmosphere, a mixture of glutaric anhydride (20 mmol) in anhydrous THF (20 ml) was stirred and cooled to -10 °C. A solution of Aryl Grignard reagent was added dropwise to the cooled mixture with stirring. After 5h at -10 °C, the reaction mixture was poured into ice-cooled 3.5 M HCl (50 mL), and the product was extracted into dichloromethane. The extract was washed with cold saturated aqueous sodium carbonate, and the aqueous layers were acidified and extracted with dichloromethane. The extract was washed with brine, dried over anhydrous sodium sulfate and evaporated in vacuo without further purification to give intermediate acids as white crystal.

To a three-necked flask was added intermediate acid (10 mmol), 30 mL AcOH and Pd/C (10%) and stirred under H<sub>2</sub> balloon atmosphere in 70 °C. The reaction was monitored by TLC. When the reaction was completed, the reaction mixture was filtered through a Celite pad which was washed with acetic acid, then concentrated in vacuo to give the desired acid.

## 6.5 Synthetic route to redox-active esters (RAEs)

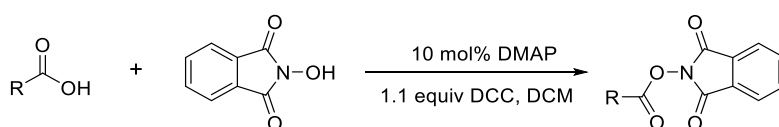

According to the known literature with slight modification, A round-bottom flask was added the carboxylic acid (4.0 mmol), N-hydroxyphthalimide (1.1 equiv), 4-dimethylaminopyridine (DMAP, 10 mol%), Dichloromethane (DCM) was added (15 mL), and the mixture was stirred vigorously. And then the solution of DCC (4.4 mmol in 6 mL DCM) was added dropwise via syringe at room temperature. After completed, the white precipitate was filtered off and the solution was concentrated in vacuo. Corresponding redox active esters were purified rapidly by flash column chromatography. (*Science*, **2017**, 356, 7355; *Org. Lett.* **2018**, 20, 3296)

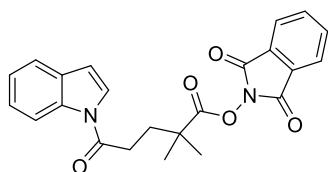

**1,3-dioxoisindolin-2-yl 5-(1H-indol-1-yl)-2,2-dimethyl-5-oxopentanoate**

**<sup>1</sup>H NMR (400 MHz, CDCl<sub>3</sub>)** δ 8.51 (d, *J* = 8.2 Hz, 1H), 7.93 – 7.83 (m, 2H), 7.82 – 7.74 (m, 2H), 7.71 (d, *J* = 3.8 Hz, 1H), 7.58 (d, *J* = 7.6 Hz, 1H), 7.37 (t, *J* = 7.8 Hz, 1H), 7.29 (t, *J* = 7.5 Hz, 1H), 6.68 (d, *J* = 3.6 Hz, 1H), 3.30 – 3.05 (m, 2H), 2.38 – 2.23 (m, 2H), 1.52 (s, 6H).

**<sup>13</sup>C NMR (101 MHz, CDCl<sub>3</sub>)** δ 173.36, 170.84, 162.11, 135.68, 134.81, 130.49, 128.91, 125.07, 125.02, 123.98, 123.68, 120.81, 116.65, 109.36, 41.58, 35.37, 31.62, 25.26.

**HRMS (ESI)** calcd for C<sub>23</sub>H<sub>20</sub>N<sub>2</sub>O<sub>5</sub> (M+Na)<sup>+</sup>: 427.1264, found: 427.1263.

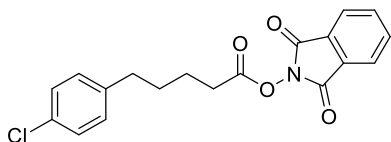

**1,3-dioxoisindolin-2-yl 5-(4-chlorophenyl) pentanoate**

**<sup>1</sup>H NMR (400 MHz, CDCl<sub>3</sub>)** δ 7.97 – 7.84 (m, 1H), 7.84 – 7.66 (m, 1H), 7.26 (d, *J* = 8.4 Hz, 1H), 7.14 (d, *J* = 8.3 Hz, 1H), 2.84 – 2.50 (m, 2H), 1.96 – 1.62 (m, 2H).

**<sup>13</sup>C NMR (101 MHz, CDCl<sub>3</sub>)** δ 169.41, 161.95, 140.16, 134.78, 131.58, 129.76, 128.89, 128.47, 123.95, 34.70, 30.80, 30.25, 24.17.

**HRMS (ESI)** calcd for C<sub>19</sub>H<sub>16</sub>ClNO<sub>4</sub> (M+Na)<sup>+</sup>: 380.0660, found: 380.0661.

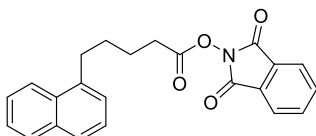

**1,3-dioxoisindolin-2-yl 5-(naphthalen-1-yl) pentanoate**

**<sup>1</sup>H NMR (400 MHz, CDCl<sub>3</sub>)** δ 7.80 – 7.75 (m, 1H), 7.74 – 7.68 (m, 2H), 7.67 – 7.64 (m, 1H), 7.55 (s, 1H), 7.39 – 7.29 (m, 1H), 7.26 (dd, *J* = 8.4, 1.6 Hz, 1H), 2.83 – 2.70 (m, 1H), 2.68 – 2.56 (m, 1H), 1.85 – 1.69 (m, 2H).

**<sup>13</sup>C NMR (101 MHz, CDCl<sub>3</sub>)** δ 169.49, 161.99, 139.24, 134.74, 133.64, 132.06, 128.93, 127.98, 127.62, 127.47, 127.24, 126.46, 125.93, 125.18, 123.95, 35.53, 30.89, 30.28, 24.30.

**HRMS (ESI)** calcd for C<sub>23</sub>H<sub>19</sub>NO<sub>4</sub> (M+H)<sup>+</sup>: 374.1387, found: 374.1391.

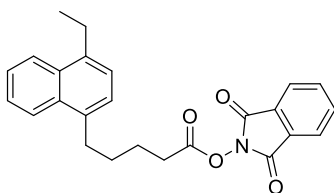

**1,3-dioxoisindolin-2-yl 5-(4-ethylnaphthalen-1-yl) pentanoate**

**<sup>1</sup>H NMR (400 MHz, CDCl<sub>3</sub>)** δ 8.03 – 7.94 (m, 2H), 7.83 – 7.74 (m, 2H), 7.70 – 7.62 (m, 2H), 7.50 – 7.37 (m, 2H), 7.19 (s, 2H), 3.10 – 2.95 (m, 4H), 2.69 – 2.59 (m, 2H), 1.93 – 1.74 (m, 4H), 1.30 (t, *J* = 7.5 Hz, 3H).

**<sup>13</sup>C NMR (101 MHz, CDCl<sub>3</sub>)** δ 169.52, 161.98, 138.69, 135.81, 134.73, 132.18, 132.07, 128.94, 125.88, 125.38, 125.29, 124.57, 124.51, 124.45, 123.94, 32.57, 30.93, 29.86, 25.90, 24.75, 15.08.

**HRMS (ESI)** calcd for C<sub>25</sub>H<sub>23</sub>NO<sub>4</sub> (M+Na)<sup>+</sup>: 424.1519, found: 424.1518.

## 7 X-ray crystallography

Single crystal **34a**:

The colourless crystal in block-shape, with approximate dimensions of 0.333 × 0.366 × 0.531 mm<sup>3</sup>, was selected and mounted for the single-crystal X-ray diffraction. The data set was collected by Bruker D8 Venture Photon II

diffractometer at 173(2)K equipped with micro-focus Cu radiation source ( $K_{\alpha} = 1.54178\text{\AA}$ ). Applied with face-indexed numerical absorption correction, the structure solution was solved and refinement was processed by SHELXTL (version 6.14) and OLEX 2.3 program package. [4-7] The structure was analyzed by ADDSYM routine implemented in PLATON suite and no higher symmetry was suggested. [8]

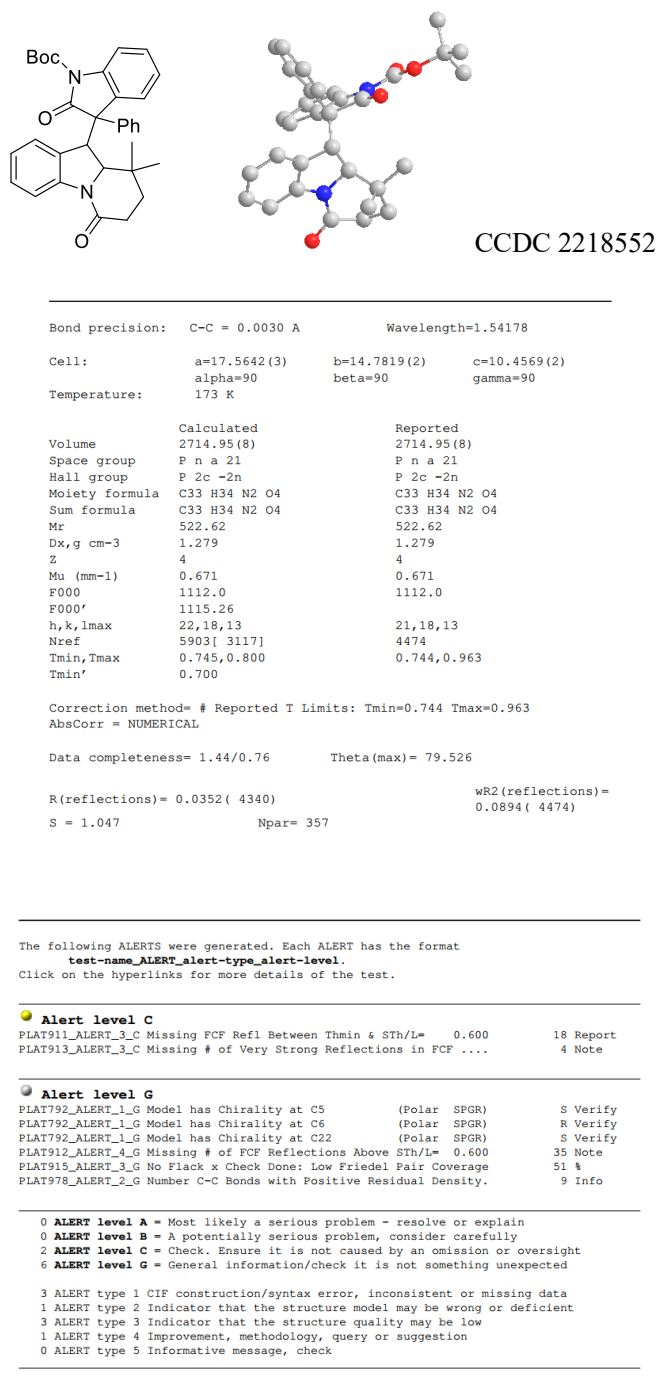

Figure 12. X-ray crystallography data of single crystal **34a**

#### Single crystal **34b**:

The colourless crystal in block-shape, with approximate dimensions of  $0.146 \times 0.282 \times 0.424 \text{ mm}^3$ , was selected and mounted for the single-crystal X-ray diffraction. The data set was collected by Bruker D8 Venture Photon II diffractometer at 173(2)K equipped with micro-focus Cu radiation source ( $K_{\alpha} = 1.54178\text{\AA}$ ). Applied with face-indexed numerical absorption correction, the structure solution was solved and refinement was processed



by SHELXTL (version 6.14) and OLEX 2.3 program package. [4-7] The structure was analyzed by ADDSYM routine implemented in PLATON suite and no higher symmetry was suggested. [8]

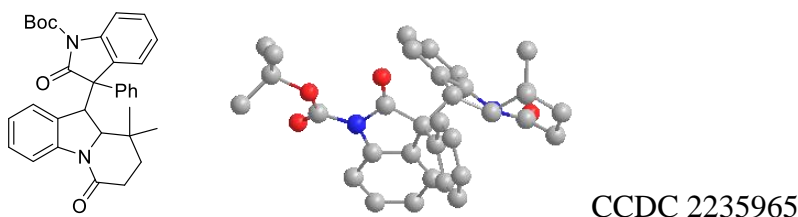

#### Datablock: zhk016

|                                                               |                |                    |                    |
|---------------------------------------------------------------|----------------|--------------------|--------------------|
| Bond precision:                                               | C-C = 0.0020 Å |                    | Wavelength=1.54178 |
| Cell:                                                         | a=18.3540(5)   | b=9.4179(2)        | c=18.5267(5)       |
|                                                               | alpha=90       | beta=119.6900      | gamma=90           |
| Temperature:                                                  | 173 K          |                    |                    |
|                                                               | Calculated     | Reported           |                    |
| Volume                                                        | 2782.03(12)    | 2781.97(12)        |                    |
| Space group                                                   | P 21/c         | P 21/c             |                    |
| Hall group                                                    | -P 2ybc        | -P 2ybc            |                    |
| Moiety formula                                                | C33 H34 N2 O4  | C33 H34 N2 O4      |                    |
| Sum formula                                                   | C33 H34 N2 O4  | C33 H34 N2 O4      |                    |
| Mr                                                            | 522.62         | 522.62             |                    |
| Dx, g cm-3                                                    | 1.248          | 1.248              |                    |
| Z                                                             | 4              | 4                  |                    |
| Mu (mm-1)                                                     | 0.654          | 0.654              |                    |
| F000                                                          | 1112.0         | 1112.0             |                    |
| F000'                                                         | 1115.26        |                    |                    |
| h, k, lmax                                                    | 22, 11, 22     | 22, 11, 22         |                    |
| Nref                                                          | 5106           | 5100               |                    |
| Tmin, Tmax                                                    | 0.801, 0.909   | 0.765, 1.000       |                    |
| Tmin'                                                         | 0.758          |                    |                    |
| Correction method= # Reported T Limits: Tmin=0.765 Tmax=1.000 |                |                    |                    |
| AbsCorr = NUMERICAL                                           |                |                    |                    |
| Data completeness=                                            | 0.999          | Theta(max)= 68.304 |                    |
| R(reflections)= 0.0390( 4637)                                 |                |                    |                    |
| wR2(reflections)=                                             |                |                    |                    |
| S = 1.058                                                     | Npar= 358      | 0.1022( 5100)      |                    |

The following ALERTS were generated. Each ALERT has the format  
**test-name\_ALERT\_alert-type\_alert-level.**  
Click on the hyperlinks for more details of the test.

|                      |                                                  |               |  |
|----------------------|--------------------------------------------------|---------------|--|
| <b>Alert level C</b> |                                                  |               |  |
| PLAT241_ALERT_2_C    | High 'MainMol' Ueq as Compared to Neighbors of   | C3 Check      |  |
| PLAT911_ALERT_3_C    | Missing FCF Refl Between Thmin & STh/L= 0.600    | 3 Report      |  |
| <b>Alert level G</b> |                                                  |               |  |
| PLAT145_ALERT_4_G    | s.u. on beta Small or Missing .....              | 0.0000 Degree |  |
| PLAT793_ALERT_4_G    | Model has Chirality at C5 (Centro SPGR)          | R Verify      |  |
| PLAT793_ALERT_4_G    | Model has Chirality at C6 (Centro SPGR)          | S Verify      |  |
| PLAT793_ALERT_4_G    | Model has Chirality at C22 (Centro SPGR)         | S Verify      |  |
| PLAT912_ALERT_4_G    | Missing # of FCF Reflections Above STh/L= 0.600  | 3 Note        |  |
| PLAT978_ALERT_2_G    | Number C-C Bonds with Positive Residual Density. | 16 Info       |  |

0 **ALERT level A** = Most likely a serious problem - resolve or explain  
2 **ALERT level B** = A potentially serious problem, consider carefully  
2 **ALERT level C** = Check. Ensure it is not caused by an omission or oversight  
6 **ALERT level G** = General information/check it is not something unexpected  
0 ALERT type 1 CIF construction/syntax error, inconsistent or missing data  
2 ALERT type 2 Indicator that the structure model may be wrong or deficient  
1 ALERT type 3 Indicator that the structure quality may be low  
5 ALERT type 4 Improvement, methodology, query or suggestion  
0 ALERT type 5 Informative message, check

Figure 13. X-ray crystallography data of single crystal 34b

Single crystal 21:

The colourless crystal in block-shape, with approximate dimensions of  $0.187 \times 0.187 \times 0.423$  mm<sup>3</sup>, was selected and mounted for the single-crystal X-ray diffraction. The data set was collected by Bruker D8 Venture Photon II diffractometer at 170(2)K equipped with micro-focus Cu radiation source ( $K\alpha = 1.54178\text{\AA}$ ). Applied with face-indexed numerical absorption correction, the structure solution was solved and refinement was processed by SHELXTL (version 6.14) and OLEX 2.3 program package. [4-7] The structure was analyzed by ADDSYM routine implemented in PLATON suite and no higher symmetry was suggested. [8]

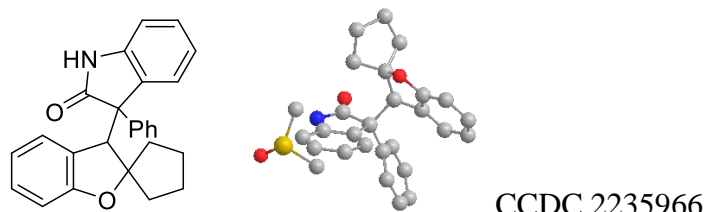

#### Datablock: zhk013

|                        |                                            |                                                            |
|------------------------|--------------------------------------------|------------------------------------------------------------|
| Bond precision:        | C-C = 0.0021 Å                             | Wavelength=1.54178                                         |
| Cell:                  | a=10.7923(2)<br>alpha=90                   | b=15.0923(3)<br>beta=93.717(1)<br>c=14.4236(3)<br>gamma=90 |
| Temperature:           | 173 K                                      |                                                            |
| Volume                 | Calculated<br>2344.38(8)                   | Reported<br>2344.38(8)                                     |
| Space group            | P 21/n                                     | P 21/n                                                     |
| Hall group             | -P 2yn                                     | -P 2yn                                                     |
| Moiety formula         | C26 H23 N O2, C2 H6 O S                    | C26 H23 N O2, C2 H6 O S                                    |
| Sum formula            | C28 H29 N O3 S                             | C28 H29 N O3 S                                             |
| Mr                     | 459.58                                     | 459.58                                                     |
| Dx, g cm <sup>-3</sup> | 1.302                                      | 1.302                                                      |
| Z                      | 4                                          | 4                                                          |
| Mu (mm <sup>-1</sup> ) | 1.466                                      | 1.466                                                      |
| F000                   | 976.0                                      | 976.0                                                      |
| F000'                  | 979.96                                     |                                                            |
| h,k,lmax               | 13,19,18                                   | 13,19,18                                                   |
| Nref                   | 5101                                       | 4893                                                       |
| Tmin,Tmax              | 0.756,0.760                                | 0.825,0.980                                                |
| Tmin'                  | 0.512                                      |                                                            |
| Correction method=     | # Reported T Limits: Tmin=0.825 Tmax=0.980 |                                                            |
| AbsCorr =              | NUMERICAL                                  |                                                            |
| Data completeness=     | 0.959                                      | Theta(max)= 79.529                                         |
| R(reflections)=        | 0.0387( 4340)                              | wR2(reflections)=<br>0.1171( 4893)                         |
| S =                    | 1.063                                      | Npar= 304                                                  |

The following ALERTS were generated. Each ALERT has the format  
test-name\_ALERT\_alert-type\_alert-level.  
Click on the hyperlinks for more details of the test.

|                                                                    |              |
|--------------------------------------------------------------------|--------------|
| <b>Alert level C</b>                                               |              |
| PLAT244_ALERT_4_C Low 'Solvent' Ueq as Compared to Neighbors of    | S1S Check    |
| PLAT911_ALERT_3_C Missing FCF Refl Between Tmin & Sth/L= 0.600     | 38 Report    |
| PLAT918_ALERT_3_C Reflection(s) with I(obs) much Smaller I(calc) . | 1 Check      |
| PLAT934_ALERT_3_C Number of (Iobs-Icalc)/Sigma(W) > 10 Outliers .. | 1 Check      |
| <b>Alert level G</b>                                               |              |
| PLAT002_ALERT_2_G Number of Distance or Angle Restraints on AtSite | 2 Note       |
| PLAT172_ALERT_4_G The CIF-Embedded .res File Contains DFIX Records | 1 Report     |
| PLAT398_ALERT_2_G Deviating C-O-C Angle From 120 for O2            | 106.5 Degree |
| PLAT720_ALERT_4_G Number of Unusual/Non-Standard Labels .....      | 6 Note       |
| PLAT793_ALERT_4_G Model has Chirality at C2 (Centro SPGR)          | R Verify     |
| PLAT793_ALERT_4_G Model has Chirality at C26 (Centro SPGR)         | S Verify     |
| PLAT860_ALERT_3_G Number of Least-Squares Restraints .....         | 1 Note       |
| PLAT912_ALERT_4_G Missing # of FCF Reflections Above Sth/L= 0.600  | 170 Note     |
| PLAT941_ALERT_3_G Average HKL Measurement Multiplicity .....       | 3.8 Low      |
| PLAT978_ALERT_2_G Number C-C Bonds with Positive Residual Density. | 14 Info      |
| PLAT992_ALERT_5_G Repd & Actual _reflns_number_gt Values Differ by | 4 Check      |

0 **ALERT level A** = Most likely a serious problem - resolve or explain  
 0 **ALERT level B** = A potentially serious problem, consider carefully  
 4 **ALERT level C** = Check. Ensure it is not caused by an omission or oversight  
 11 **ALERT level G** = General information/check it is not something unexpected

0 ALERT type 1 CIF construction/syntax error, inconsistent or missing data  
 3 ALERT type 2 Indicator that the structure model may be wrong or deficient  
 5 ALERT type 3 Indicator that the structure quality may be low  
 6 ALERT type 4 Improvement, methodology, query or suggestion  
 1 ALERT type 5 Informative message, check

Figure 14. X-ray crystallography data of single crystal 21

## 8 Analytical Data of Compounds

**Note:** The unknown impurity: Around 1.56 ppm (water peak) and 1.00 ppm – 1.42 ppm in NMR are respectively from the  $\text{CDCl}_3$  and eluent (petroleum ether), which do not affect the yield of the product.

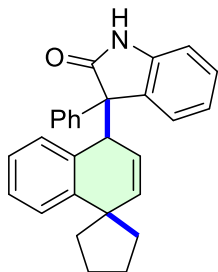

**$^1\text{H}$  NMR (400 MHz,  $\text{CDCl}_3$ )**  $\delta$  8.70 (s, 0.5H), 8.39 (s, 0.5H), 7.73 – 7.61 (m, 1H), 7.62 – 7.52 (m, 1H), 7.49 – 7.41 (m, 1H), 7.41 – 7.27 (m, 3.5H), 7.24 – 7.12 (m, 1H), 7.12 – 6.81 (m, 3H), 6.81 – 6.70 (m, 1H), 6.66 (d,  $J$  = 7.7 Hz, 0.5H), 6.29 (d,  $J$  = 7.8 Hz, 0.5H), 5.89 – 5.76 (m, 1H), 5.74 – 5.60 (m, 1H), 5.47 (dd,  $J$  = 10.4, 3.9 Hz, 0.5H), 4.82 (d,  $J$  = 3.3 Hz, 0.5H), 4.70 (d,  $J$  = 4.2 Hz, 0.5H), 2.12 – 1.36 (m, 8H).

**$^{13}\text{C}$  NMR (101 MHz,  $\text{CDCl}_3$ )**  $\delta$  181.07, 180.07, 146.33, 145.43, 141.78, 140.85, 138.74, 138.47, 138.20, 137.82, 133.02, 132.38, 129.10, 128.75, 128.54, 128.37, 128.27, 128.12, 128.10, 127.96, 127.83, 127.50, 127.45, 127.38, 127.33, 127.19, 126.91, 126.71, 126.65, 124.92, 124.40, 121.53, 121.43, 119.23, 118.93, 109.77, 109.60, 62.80, 62.15, 47.75, 47.08, 45.87, 45.83, 45.70, 45.42, 44.44, 44.11, 27.28, 26.60, 26.41, 26.39.

**HRMS (ESI)** calcd for  $\text{C}_{28}\text{H}_{25}\text{NO}$  ( $\text{M}+\text{Na}$ ) $^+$ : 414.1828, found: 414.1833.

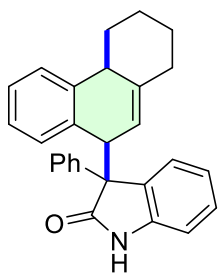

**$^1\text{H}$  NMR (400 MHz,  $\text{CDCl}_3$ )**  $\delta$  9.02 (s, 0.25H), 8.98 (s, 0.25H), 8.94 (s, 0.2H), 8.72 (s, 0.25H), 7.76 – 7.47 (m, 2H), 7.46 – 7.39 (m, 0.5H), 7.37 – 7.21 (m, 3.3H), 7.18 – 6.63 (m, 6H), 6.53 (d,  $J$  = 7.5 Hz, 0.25H), 6.34 – 6.22 (m, 0.5H), 5.77 – 5.69 (m, 0.5H), 5.65 – 5.58 (m, 0.5H), 5.45 – 5.37 (m, 0.25H), 5.35 – 5.26 (m, 0.2H), 4.87 – 4.79 (m, 0.2H), 4.77 – 4.71 (m, 0.3H), 4.71 – 4.62 (m, 0.2H), 4.60 – 4.53 (m, 0.25H), 4.31 – 3.70 (m, 0.21H), 3.05 – 2.73 (m, 0.8H), 2.40 – 0.86 (m, 8H).

**$^{13}\text{C}$  NMR (101 MHz,  $\text{CDCl}_3$ )**  $\delta$  181.16, 180.74, 180.14, 180.11, 143.28, 142.21, 142.03, 141.65, 141.62, 141.27, 141.16, 141.12, 140.57, 139.67, 139.24, 138.78, 138.59, 138.19, 138.08, 132.78, 132.69, 132.32, 132.22, 129.48, 129.37, 128.74, 128.71, 128.58, 128.53, 128.39, 128.35, 128.30, 128.23, 128.14, 128.10, 127.97, 127.74, 127.71, 127.48, 127.42, 127.36, 127.31, 127.00, 126.92, 126.62, 126.51, 126.37, 126.29, 126.21, 125.44, 124.88, 121.59, 121.41, 121.20, 121.08, 117.07, 115.91, 115.73, 115.34, 109.75, 109.55, 109.47, 63.41, 63.34, 63.02, 62.53, 48.63, 48.26, 46.73, 46.39, 42.14, 41.83, 40.10, 39.12, 36.53, 36.36, 36.10, 35.98, 35.87, 35.70, 35.40, 28.69, 27.64, 27.20, 27.16, 27.05, 26.91, 26.62, 26.40.

**HRMS (ESI)** calcd for  $\text{C}_{28}\text{H}_{25}\text{NO}$  ( $\text{M}+\text{Na}$ ) $^+$ : 414.1828, found: 414.1832.

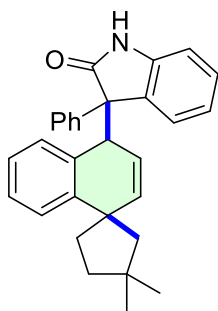

**$^1\text{H}$  NMR (400 MHz,  $\text{CDCl}_3/\text{DMSO}-d_6 = 1/1$ )**  $\delta$  10.50 (s, 0.5H), 10.29 (s, 0.5H), 8.06 (dd,  $J = 26.5, 9.1$  Hz, 0.5H), 7.73 (dd,  $J = 7.5, 1.2$  Hz, 0.25H), 7.66 – 7.55 (m, 0.5H), 7.55 – 7.48 (m, 1.25H), 7.48 – 7.42 (m, 1H), 7.40 – 7.13 (m, 5.5H), 7.03 (m, 1H), 6.98 (m, 1H), 6.92 – 6.86 (m, 0.5H), 6.77 – 6.69 (m, 1H), 6.52 (d,  $J = 7.7$  Hz, 0.5H), 6.20 (d,  $J = 7.9$  Hz, 0.5H), 5.73 (d,  $J = 8.0$  Hz, 0.5H), 5.53 (m, 0.5H), 5.41 – 5.26 (m, 0.5H), 4.62 (m, 0.5H), 4.45 (m, 0.5H), 3.05 – 2.87 (m, 1H), 2.46 – 2.27 (m, 1H), 1.95 (m, 2H), 1.83 – 1.71 (m, 0.5H), 1.42 – 1.35 (m, 0.5H), 1.27 (m, 1H), 1.07 (s, 1.5H), 0.83 (m, 4.5H).

**$^{13}\text{C}$  NMR (101 MHz,  $\text{CDCl}_3/\text{DMSO}-d_6 = 1/1$ )**  $\delta$  179.22, 178.49, 143.13, 142.55, 141.65, 141.38, 141.30, 139.90, 138.93, 138.79, 133.11, 132.90, 129.42, 129.20, 128.88, 128.82, 128.72, 128.61, 128.57, 128.52, 128.32, 128.06, 128.00, 127.94, 127.68, 127.50, 127.34, 127.31, 127.07, 126.75, 126.55, 126.45, 126.38, 126.23, 125.57, 125.04, 121.38, 120.62, 117.40, 116.35, 109.59, 109.56, 62.90, 62.71, 48.84, 48.18, 47.97, 46.07, 44.55, 35.76, 35.01, 32.90, 32.86, 31.72, 31.40, 31.35, 31.22, 24.15, 23.78.

**HRMS (ESI)** calcd for  $\text{C}_{30}\text{H}_{29}\text{NO}$  ( $\text{M}+\text{H}$ ) $^+$ : 420.2322, found: 420.2324.

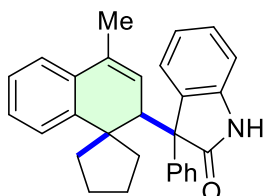

**$^1\text{H}$  NMR (400 MHz, DMSO)**  $\delta$  10.44 (s, 0.5H), 10.37 (s, 0.5H), 7.69 – 7.47 (m, 1H), 7.41 – 7.33 (m, 1H), 7.32 – 7.21 (m, 3H), 7.21 – 7.12 (m, 1H), 7.12 – 6.98 (m, 1.5H), 6.97 – 6.80 (m, 1.5H), 6.79 – 6.59 (m, 1.5H), 6.47 – 6.38 (m, 1H), 6.35 (d,  $J = 8.1$  Hz, 0.5H), 6.27 – 6.11 (m, 1H), 5.77 (d,  $J = 6.0$  Hz, 0.5H), 5.46 (d,  $J = 6.1$  Hz, 0.5H), 3.53 – 3.41 (m, 1H), 2.31 – 1.95 (m, 1H), 1.92 (s, 1.5H), 1.84 – 1.75 (m, 1H), 1.72 (s, 1.5H), 1.70 – 0.93 (m, 7H).

**$^{13}\text{C}$  NMR (101 MHz, DMSO)**  $\delta$  179.93, 178.72, 143.16, 143.04, 142.53, 141.44, 139.57, 139.45, 134.61, 134.21, 133.84, 133.55, 128.70, 128.56, 128.30, 127.80, 127.60, 127.37, 127.23, 127.01, 126.86, 126.19, 125.95, 125.17, 124.78, 124.19, 123.38, 120.10, 119.48, 109.50, 109.04, 61.04, 58.89, 53.58, 52.21, 50.89, 45.33, 45.27, 32.13, 29.44, 25.44, 24.68, 22.32, 22.09, 19.66, 19.56.

**HRMS (ESI)** calcd for  $\text{C}_{29}\text{H}_{27}\text{NO}$  ( $\text{M}+\text{Na}$ ) $^+$ : 428.1985, found: 428.1984.

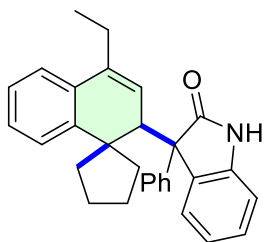

**$^1\text{H}$  NMR (400 MHz,  $\text{CDCl}_3$ )**  $\delta$  8.77 – 8.34 (m, 1H), 7.78 – 7.58 (m, 1H), 7.54 – 7.45 (m, 1H), 7.37 – 7.27 (m, 1.4H), 7.25 – 7.16 (m, 1.6H), 7.16 – 6.72 (m, 5H), 6.69 (d,  $J = 7.7$  Hz, 0.5H), 6.50 (d,  $J = 7.6$  Hz, 1H), 6.47 – 6.40 (d,  $J = 7.3$  Hz, 0.5H), 6.37 – 6.22 (m, 1H), 5.88 (d,  $J = 6.1$  Hz, 0.5H), 5.49 (d,  $J = 6.2$  Hz, 0.5H), 3.58 (d,  $J = 6.3$  Hz, 0.5H),

3.52 (d,  $J = 6.1$  Hz, 0.5H), 2.58 – 2.38 (m, 0.5H), 2.39 – 2.22 (m, 0.5H), 2.20 – 1.99 (m, 1H), 1.92 – 1.56 (m, 5H), 1.55 – 1.07 (m, 3H), 1.00 (t,  $J = 7.4$  Hz, 1.5H), 0.86 (t,  $J = 7.4$  Hz, 1.5H).

**$^{13}\text{C}$  NMR (101 MHz,  $\text{CDCl}_3$ )**  $\delta$  181.27, 180.11, 143.60, 143.56, 141.03, 140.07, 139.73, 139.39, 138.60, 138.54, 133.83, 133.51, 128.94, 128.76, 128.29, 128.23, 128.17, 128.01, 127.55, 127.24, 127.15, 127.08, 126.96, 126.82, 126.78, 126.59, 125.74, 125.43, 125.34, 124.80, 124.39, 123.23, 122.87, 122.70, 120.62, 120.07, 109.19, 108.91, 61.53, 59.11, 53.68, 52.82, 50.79, 45.24, 45.11, 32.34, 29.76, 25.70, 25.56, 25.42, 24.87, 22.38, 22.17, 13.54, 13.15.

**HRMS (ESI)** calcd for  $\text{C}_{30}\text{H}_{29}\text{NO}$  ( $\text{M}+\text{H}$ ) $^+$ : 420.2322, found: 420.2321.

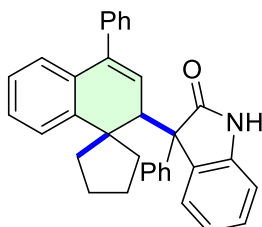

**$^1\text{H}$  NMR (400 MHz,  $\text{DMSO}-d_6$ )**  $\delta$  10.56 (s, 0.5H), 10.43 (s, 0.5H), 7.62 (s, 0.5H), 7.54 (m, 1H), 7.31 (m, 3H), 7.24 (m, 2H), 7.13 (m, 1H), 6.97 (m, 3H), 6.93 – 6.79 (m, 3H), 6.72 (m, 1H), 6.48 (d,  $J = 7.8$  Hz, 0.5H), 6.41 (m, 1H), 6.30 (d,  $J = 7.8$  Hz, 0.5H), 6.17 (m, 1H), 5.88 (d,  $J = 6.1$  Hz, 0.5H), 5.49 (d,  $J = 6.3$  Hz, 0.5H), 3.62 (d,  $J = 6.4$  Hz, 1H), 3.56 (d,  $J = 6.2$  Hz, 1H), 2.11 – 1.44 (m, 9H).

**$^{13}\text{C}$  NMR (101 MHz,  $\text{DMSO}-d_6$ )**  $\delta$  179.83, 178.80, 143.54, 142.56, 141.32, 141.15, 140.60, 140.54, 140.46, 139.03, 138.87, 133.76, 133.35, 129.49, 128.64, 128.56, 128.41, 128.32, 128.16, 127.98, 127.70, 127.66, 127.55, 127.49, 127.41, 127.31, 127.19, 126.43, 125.86, 125.81, 125.72, 125.02, 124.68, 120.07, 119.67, 109.51, 109.04, 60.91, 58.78, 53.84, 52.78, 50.71, 50.67, 45.14, 32.15, 29.50, 25.55, 24.77, 22.52, 22.18.

**HRMS (ESI)** calcd for  $\text{C}_{34}\text{H}_{29}\text{NO}$  ( $\text{M}+\text{H}$ ) $^+$ : 468.2322, found: 468.2321.

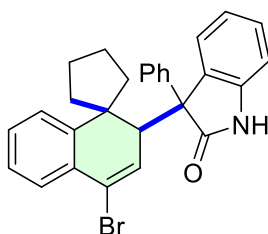

**$^1\text{H}$  NMR (400 MHz,  $\text{CDCl}_3$ )**  $\delta$  8.54 (s, 0.5H), 8.24 (s, 0.5H), 7.63 – 7.53 (m, 1H), 7.53 – 7.46 (m, 1H), 7.39 – 7.32 (m, 1H), 7.32 – 7.18 (m, 3H), 7.17 – 7.03 (m, 1H), 7.02 – 6.62 (m, 3.5H), 6.57 (d,  $J = 7.6$  Hz, 0.5H), 6.20 (d,  $J = 7.6$  Hz, 0.5H), 5.84 – 5.61 (m, 1H), 5.61 – 5.46 (m, 1H), 5.38 (dd,  $J = 10.4, 3.9$  Hz, 0.5H), 4.74 (d,  $J = 2.9$  Hz, 0.5H), 4.61 (d,  $J = 4.2$  Hz, 0.5H), 2.04 – 1.31 (m, 8H).

**$^{13}\text{C}$  NMR (101 MHz,  $\text{CDCl}_3$ )**  $\delta$  180.65, 179.63, 146.31, 145.45, 141.55, 140.62, 138.67, 138.40, 138.19, 137.81, 132.97, 132.35, 129.02, 128.70, 128.55, 128.37, 128.11, 128.08, 127.91, 127.80, 127.51, 127.39, 127.32, 127.19, 126.89, 126.71, 126.68, 124.89, 124.39, 121.56, 121.46, 119.17, 118.91, 109.55, 109.38, 62.67, 62.02, 47.74, 47.08, 45.86, 45.79, 45.65, 45.39, 44.43, 44.08, 27.27, 26.58, 26.39, 26.36.

**HRMS (ESI)** calcd for  $\text{C}_{28}\text{H}_{24}\text{BrNO}$  ( $\text{M}+\text{Na}$ ) $^+$ : 492.0933, found: 492.0934.

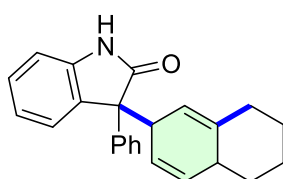

**<sup>1</sup>H NMR (400 MHz, CDCl<sub>3</sub>)** δ 9.10 – 8.86 (m, 1H), 7.60 – 7.44 (m, 2H), 7.42 – 7.27 (m, 4H), 7.25 – 7.17 (m, 1H), 7.10 – 6.86 (m, 2H), 5.72 – 5.61 (m, 1H), 5.53 – 5.29 (m, 2H), 5.25 – 5.02 (m, 1H), 4.20 – 4.02 (m, 1H), 2.52 – 0.38 (m, 9H).

**<sup>13</sup>C NMR (101 MHz, CDCl<sub>3</sub>)** δ 180.18, 180.06, 143.04, 142.41, 142.18, 141.95, 141.37, 141.31, 141.20, 137.91, 137.84, 137.77, 137.66, 136.69, 133.44, 132.93, 132.71, 132.21, 130.20, 130.14, 130.02, 129.91, 128.57, 128.51, 128.12, 127.94, 127.91, 127.70, 127.62, 127.51, 127.37, 127.33, 127.30, 127.15, 126.35, 126.29, 122.89, 122.70, 122.34, 121.80, 121.73, 121.64, 121.51, 121.43, 120.96, 120.37, 115.53, 115.15, 114.97, 114.77, 109.89, 109.78, 61.07, 60.82, 60.68, 44.75, 44.66, 44.43, 44.29, 43.87, 43.76, 41.51, 40.94, 38.48, 38.45, 38.23, 35.88, 35.61, 35.32, 35.03, 34.97, 34.66, 28.19, 27.99, 27.78, 26.63, 26.54, 26.35, 24.62.

**HRMS (ESI)** calcd for C<sub>24</sub>H<sub>23</sub>NO (M+H)<sup>+</sup>: 342.1852, found: 342.1858.

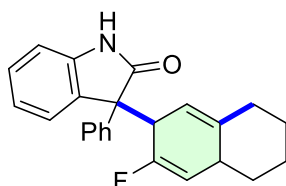

**<sup>1</sup>H NMR (400 MHz, DMSO-*d*<sub>6</sub>)** δ 10.57 (s, 0.20H), 10.53 (s, 0.19H), 10.36 (s, 0.25H), 10.34 (s, 0.25H), 7.47 – 6.81 (m, 9H), 5.36 – 4.84 (m, 2H), 4.38 – 4.03 (m, 1H), 2.61 (m, 0.5H), 2.47 – 2.15 (m, 0.6H), 2.13 – 0.80 (m, 8H).

**<sup>13</sup>C NMR (101 MHz, DMSO-*d*<sub>6</sub>)** δ 178.64, 178.49, 178.01, 177.91, 143.13, 143.06, 142.75, 142.54, 142.52, 142.42, 142.40, 141.65, 141.63, 139.01, 138.86, 138.54, 138.31, 129.17, 128.98, 128.94, 128.88, 128.72, 128.62, 128.41, 128.32, 127.76, 127.74, 127.72, 127.64, 127.57, 127.31, 127.26, 126.46, 125.97, 121.67, 121.58, 121.33, 121.09, 115.43, 115.39, 115.31, 115.22, 115.05, 114.97, 114.81, 114.73, 114.37, 114.29, 110.18, 109.98, 109.85, 109.64, 109.50, 109.18, 109.04, 107.94, 107.80, 107.69, 107.54, 59.52, 58.67, 58.02, 45.10, 44.96, 44.91, 44.89, 44.68, 44.49, 44.40, 44.27, 44.18, 38.97, 38.89, 38.82, 38.49, 38.42, 38.05, 37.98, 35.34, 34.97, 34.89, 34.70, 34.45, 34.18, 28.40, 27.80, 27.71, 27.62, 26.03, 25.92, 25.69, 25.54.

**<sup>19</sup>F NMR (377 MHz, DMSO-*d*<sub>6</sub>)** δ -104.39, -105.14, -110.23, -110.88.

**HRMS (ESI)** calcd for C<sub>24</sub>H<sub>22</sub>FNO (M+H)<sup>+</sup>: 360.1758, found: 360.1759.

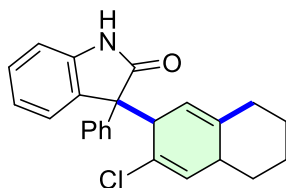

**<sup>1</sup>H NMR (400 MHz, CDCl<sub>3</sub>)** δ 8.52 – 8.24 (m, 1H), 7.55 – 7.40 (m, 1H), 7.39 – 7.26 (m, 1.7H), 7.25 – 7.16 (m, 3.2H), 7.14 – 6.69 (m, 3.3H), 5.71 (dd, *J* = 16.1, 3.4 Hz, 0.5H), 5.44 (dd, *J* = 28.6, 2.8 Hz, 0.5H), 5.29 – 5.18 (m, 0.5H), 5.03 – 4.87 (m, 0.5H), 4.33 – 4.03 (m, 1H), 2.63 – 2.23 (m, 1H), 2.12 – 1.70 (m, 2H), 1.63 – 0.72 (m, 6H).

**<sup>13</sup>C NMR (101 MHz, CDCl<sub>3</sub>)** δ 180.74, 180.32, 179.21, 179.02, 142.32, 141.98, 141.68, 141.39, 141.16, 140.32, 138.52, 138.07, 137.94, 137.43, 133.01, 132.26, 130.79, 130.37, 129.89, 129.67, 129.13, 129.09, 128.75, 128.68, 128.59, 128.54, 128.40, 128.06, 128.03, 127.96, 127.93, 127.86, 127.68, 127.59, 127.48, 127.44, 127.32, 127.28, 127.02, 125.80, 121.77, 121.75, 121.60, 121.33, 116.90, 116.38, 115.45, 114.98, 110.17, 109.55, 60.99, 60.81, 60.05, 59.33, 50.52, 49.92, 49.44, 48.68, 41.22, 40.88, 40.23, 39.47, 34.96, 34.88, 34.68, 34.62, 34.43, 33.97, 33.72, 33.57, 28.36, 27.64, 27.41, 27.09, 26.22, 26.16, 25.79, 25.49.

**HRMS (ESI)** calcd for C<sub>24</sub>H<sub>22</sub>ClNO (M+Na)<sup>+</sup>: 376.1463, found: 376.1462.

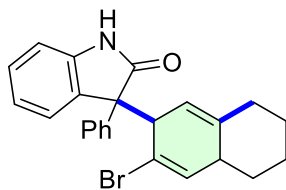

**$^1\text{H}$  NMR (400 MHz,  $\text{CDCl}_3$ )**  $\delta$  8.31 (s, 0.5H), 8.27 (s, 0.5H), 7.67 – 7.52 (m, 2H), 7.52 – 7.37 (m, 1.3H), 7.36 – 7.15 (m, 4H), 7.18 – 6.97 (m, 1H), 6.87 (m, 1H), 6.11 (d,  $J = 4.5$  Hz, 0.5H), 6.05 (d,  $J = 2.3$  Hz, 0.5H), 5.37 – 5.22 (m, 1H), 4.37 – 4.15 (m, 1H), 2.49 – 2.23 (m, 0.6H), 2.07 – 1.85 (m, 1H), 1.86 – 1.72 (m, 1H), 1.67 – 1.34 (m, 4.5H), 1.22 – 0.85 (m, 2H).

**$^{13}\text{C}$  NMR (101 MHz,  $\text{CDCl}_3$ )**  $\delta$  179.00, 178.82, 142.28, 141.87, 141.61, 141.34, 137.89, 137.66, 137.10, 137.00, 128.71, 128.44, 128.33, 128.14, 127.97, 127.88, 127.53, 127.49, 127.46, 121.77, 121.60, 119.43, 118.42, 115.72, 115.22, 109.46, 61.26, 61.00, 51.79, 51.10, 42.44, 40.53, 34.92, 34.21, 33.98, 33.18, 28.36, 26.96, 26.14, 25.38.

**HRMS (ESI)** calcd for  $\text{C}_{24}\text{H}_{22}\text{BrNO}$  ( $\text{M}+\text{H}$ ) $^+$ : 420.0958, found: 420.0952.

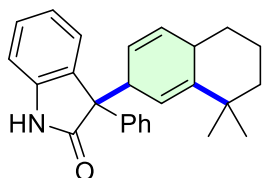

**$^1\text{H}$  NMR (400 MHz,  $\text{CDCl}_3$ )**  $\delta$  8.85 – 8.33 (m, 1H), 7.51 – 7.38 (m, 2H), 7.30 – 7.19 (m, 3.7H), 7.17 – 7.09 (m, 1.3H), 7.00 – 6.72 (m, 2H), 5.82 – 5.68 (m, 0.5H), 5.61 – 5.35 (m, 1.5H), 5.24 – 5.06 (m, 1H), 4.09 – 3.90 (m, 1H), 2.31 – 2.17 (m, 0.5H), 2.11 – 1.97 (m, 1H), 1.97 – 1.77 (m, 1H), 1.73 – 1.57 (m, 1H), 1.55 – 1.41 (m, 0.8H), 1.40 – 1.16 (m, 3.4H), 0.88 (s, 0.75H), 0.87 (s, 0.75H), 0.81 (s, 0.75H), 0.81 (s, 0.75H), 0.58 (s, 0.75H), 0.57 (s, 0.75H), 0.27 (s, 0.75H), 0.23 (s, 0.75H).

**$^{13}\text{C}$  NMR (101 MHz,  $\text{CDCl}_3$ )**  $\delta$  180.24, 179.09, 145.82, 141.81, 141.17, 139.77, 138.95, 138.15, 138.11, 136.52, 136.16, 129.98, 129.86, 129.69, 129.08, 129.01, 128.59, 128.55, 128.43, 128.25, 128.00, 127.94, 127.89, 127.71, 127.66, 127.63, 127.37, 126.67, 125.83, 125.27, 125.24, 124.66, 124.42, 122.73, 121.90, 121.85, 117.46, 110.21, 109.82, 60.37, 60.30, 52.81, 47.07, 47.03, 44.53, 44.28, 41.42, 41.21, 39.33, 35.84, 35.62, 35.16, 35.01, 33.85, 31.91, 30.78, 29.56, 29.51, 22.67, 22.57, 22.27, 21.54, 19.74.

**HRMS (ESI)** calcd for  $\text{C}_{26}\text{H}_{27}\text{NO}$  ( $\text{M}+\text{Na}$ ) $^+$ : 392.1985, found: 392.1986.

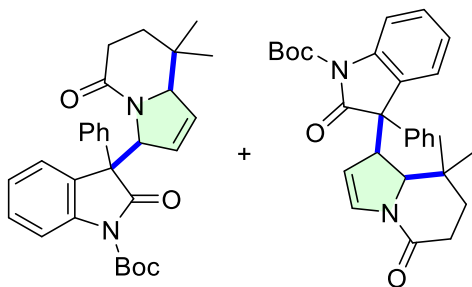

**$^1\text{H}$  NMR (400 MHz,  $\text{CDCl}_3$ )**  $\delta$  8.01 – 7.80 (m, 1H), 7.73 – 7.55 (m, 1H), 7.55 – 7.30 (m, 6H), 7.28 – 6.72 (m, 1H), 6.10 – 5.65 (m, 2H), 2.57 – 2.08 (m, 2H), 1.70 – 1.62 (m,  $J = 3.0$  Hz, 9H), 1.59 – 1.28 (m, 2H), 1.05 – 0.22 (m, 6H).

**$^{13}\text{C}$  NMR (101 MHz,  $\text{CDCl}_3$ )**  $\delta$  174.52, 174.25, 169.58, 168.90, 149.84, 149.11, 141.40, 139.77, 137.30, 137.05, 131.58, 131.47, 130.48, 130.36, 129.20, 128.84, 128.72, 128.71, 128.59, 128.55, 128.47, 128.43, 128.18, 128.12, 127.99, 127.90, 127.81, 127.61, 127.56, 127.48, 126.74, 126.71, 125.54, 125.06, 124.16, 123.85, 123.17, 115.29, 115.21, 114.59, 109.36, 84.72, 84.37, 83.75, 74.65, 74.00, 72.25, 72.05, 67.21, 66.05, 60.79, 60.08, 59.82, 55.56,

54.71, 35.38, 34.58, 34.48, 34.40, 33.96, 33.52, 32.75, 29.15, 28.93, 28.47, 28.22, 28.13, 28.08, 28.04, 27.34, 26.99, 25.65, 25.38, 25.01, 19.87, 19.43, 18.42, 18.21.

**HRMS (ESI)** calcd for  $C_{29}H_{26}N_2O_4$  ( $M+Na$ )<sup>+</sup>: 495.2254, found: 495.2253.

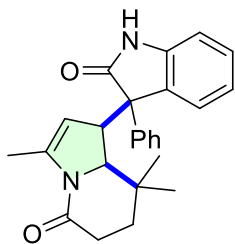

**<sup>1</sup>H NMR (400 MHz, CDCl<sub>3</sub>)** δ 9.52 (s, 0.7H), 9.32 (s, 0.5H), 7.73 (m, 1.2H), 7.49 – 7.40 (m, 1.4H), 7.37 – 7.27 (m, 5.5H), 7.25 – 7.17 (m, 1.3H), 7.15 – 6.87 (m, 3H), 4.51 (s, 1.2H), 3.94 (s, 0.7H), 3.70 (m, 0.6H), 3.61 (s, 0.5H), 2.84 (m, 0.6H), 2.53 – 2.22 (m, 2H), 2.19 (s, 1.5H), 2.15 – 2.01 (m, 0.8H), 1.91 (s, 1.5H), 1.49 – 1.33 (m, 2.5H), 0.93 (s, 2H), 0.81 (s, 2H), 0.71 (s, 1.7H), 0.27 (s, 1.7H).

**<sup>13</sup>C NMR (101 MHz, CDCl<sub>3</sub>)** δ 179.94, 179.27, 169.45, 169.23, 144.35, 144.29, 141.62, 141.03, 138.23, 136.08, 128.99, 128.95, 128.84, 128.77, 128.60, 128.45, 128.41, 127.78, 127.55, 126.68, 125.84, 122.79, 122.03, 110.41, 110.17, 107.18, 106.93, 67.81, 67.35, 60.41, 59.84, 51.94, 50.12, 34.73, 34.70, 34.33, 34.23, 31.62, 31.04, 25.71, 25.58, 21.85, 15.73, 15.43.

**HRMS (ESI)** calcd for  $C_{25}H_{26}N_2O_2$  ( $M+Na$ )<sup>+</sup>: 409.1886, found: 409.1884.

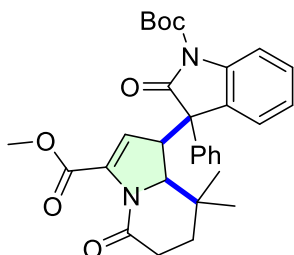

**<sup>1</sup>H NMR (400 MHz, CDCl<sub>3</sub>)** δ 7.96 (d,  $J$  = 8.2 Hz, 1H), 7.54 – 7.42 (m, 1H), 7.38 – 7.28 (m, 7H), 5.29 (d,  $J$  = 2.5 Hz, 1H), 4.40 – 4.30 (m, 1H), 3.80 (s, 3H), 3.13 (d,  $J$  = 6.0 Hz, 1H), 2.30 – 2.19 (m, 2H), 1.58 (s, 9H), 1.52 – 1.42 (m, 2H), 0.93 (s, 3H), 0.89 (s, 3H).

**<sup>13</sup>C NMR (101 MHz, CDCl<sub>3</sub>)** δ 174.71, 168.21, 162.81, 148.97, 140.27, 138.81, 137.99, 129.47, 128.92, 128.14, 127.73, 126.93, 126.55, 125.16, 115.12, 114.91, 84.76, 69.83, 59.01, 53.55, 52.52, 35.27, 33.58, 28.55, 28.02, 25.87, 19.41.

**HRMS (ESI)** calcd for  $C_{31}H_{34}N_2O_6$  ( $M+Na$ )<sup>+</sup>: 553.2309, found: 553.2308.

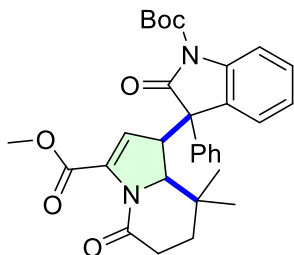

**<sup>1</sup>H NMR (400 MHz, CDCl<sub>3</sub>)** δ 8.00 – 7.79 (m, 1H), 7.78 – 7.58 (m, 2H), 7.50 – 7.29 (m, 4H), 7.25 – 7.02 (m, 2H), 6.17 – 5.15 (m, 1H), 4.04 – 3.87 (m, 1H), 3.72 – 3.53 (m, 3H), 2.60 – 2.23 (m, 1H), 1.73 – 1.56 (m, 9H), 1.56 – 1.36 (m, 2H), 1.19 – 0.82 (m, 2H), 0.71 (s, 1.5H), 0.25 (s, 1.5H).



**$^{13}\text{C}$  NMR (101 MHz,  $\text{CDCl}_3$ )**  $\delta$  175.56, 169.00, 162.47, 148.87, 139.14, 138.86, 134.98, 129.93, 129.04, 128.71, 128.61, 128.36, 127.37, 126.68, 125.68, 124.33, 115.37, 115.00, 84.84, 68.04, 59.68, 54.09, 52.14, 34.85, 34.26, 29.31, 28.17, 28.07, 25.70, 19.60.

**HRMS (ESI)** calcd for  $\text{C}_{31}\text{H}_{34}\text{N}_2\text{O}_6$  ( $\text{M}+\text{Na}$ ) $^+$ : 553.2309, found: 553.2312.

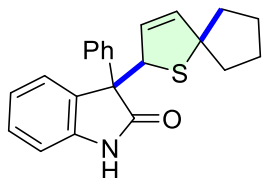

**$^1\text{H}$  NMR (400 MHz,  $\text{CDCl}_3$ )**  $\delta$  8.54 – 8.26 (m, 1H), 7.54 – 7.40 (m, 1H), 7.39 – 7.26 (m, 1.5H), 7.25 – 7.16 (m, 3.0H), 7.14 – 6.72 (m, 3.5H), 5.71 (dd,  $J$  = 16.1, 3.4 Hz, 0.5H), 5.44 (dd,  $J$  = 29.0, 3.2 Hz, 0.5H), 5.23 (dd,  $J$  = 7.7, 1.7 Hz, 0.5H), 4.95 (dd,  $J$  = 11.3, 9.5 Hz, 0.5H), 4.41 – 4.00 (m, 1H), 2.74 – 2.20 (m, 1H), 2.16 – 1.70 (m, 2H), 1.63 – 1.23 (m, 3H), 1.12 – 0.76 (m, 2H).

**$^{13}\text{C}$  NMR (101 MHz,  $\text{CDCl}_3$ )**  $\delta$  180.74, 180.32, 179.21, 179.02, 142.32, 141.98, 141.68, 141.39, 141.16, 140.32, 138.52, 138.07, 137.94, 137.43, 133.01, 132.26, 130.79, 130.37, 129.89, 129.67, 129.13, 129.09, 128.68, 128.59, 128.54, 128.40, 128.06, 127.96, 127.93, 127.86, 127.68, 127.59, 127.48, 127.44, 127.32, 127.28, 127.02, 125.80, 121.75, 121.60, 121.33, 116.90, 116.38, 115.45, 114.98, 110.17, 109.55, 60.99, 60.81, 60.05, 59.33, 50.52, 49.92, 49.44, 48.68, 41.22, 40.88, 40.23, 39.47, 34.96, 34.88, 34.68, 34.62, 34.43, 33.97, 33.72, 33.57, 28.36, 27.64, 27.41, 27.09, 26.22, 26.16, 25.79, 25.49.

**HRMS (ESI)** calcd for  $\text{C}_{22}\text{H}_{21}\text{NOS}$  ( $\text{M}+\text{Na}$ ) $^+$ : 370.1236, found: 370.1243.

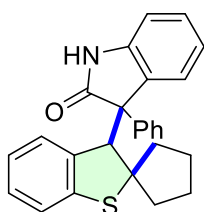

**$^1\text{H}$  NMR (400 MHz,  $\text{DMSO}$ )**  $\delta$  10.58 (s, 0.5H), 10.43 (s, 0.5H), 7.84 (d,  $J$  = 7.5 Hz, 0.5H), 7.34 – 6.72 (m, 11H), 6.56 – 6.48 (m, 1H), 5.68 (d,  $J$  = 7.7 Hz, 0.5H), 4.34 (s, 0.5H), 4.19 (s, 0.5H), 2.19 – 0.90 (m, 8H).

**$^{13}\text{C}$  NMR (101 MHz,  $\text{DMSO}$ )**  $\delta$  179.28, 142.46, 142.40, 142.05, 139.50, 139.47, 139.09, 129.17, 128.90, 128.85, 128.71, 128.64, 128.52, 128.42, 128.27, 128.12, 127.75, 127.61, 127.14, 126.39, 123.77, 123.28, 122.50, 122.42, 121.09, 120.62, 110.31, 109.51, 71.46, 71.36, 61.34, 59.95, 58.81, 45.58, 34.43, 31.89, 25.05, 24.76, 21.25, 21.00.

**HRMS (ESI)** calcd for  $\text{C}_{26}\text{H}_{23}\text{NOS}$  ( $\text{M}+\text{Na}$ ) $^+$ : 420.1393, found: 420.1391.

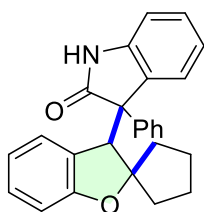

**$^1\text{H}$  NMR (400 MHz,  $\text{DMSO}$ )**  $\delta$  10.66 (s, 0.7H), 10.58 (s, 0.5H), 7.56 (s, 0.7H), 7.49 – 7.23 (m, 5H), 7.23 – 7.08 (m, 1.8H), 7.02 – 6.82 (m, 3H), 6.80 – 6.67 (m, 1.3H), 6.66 – 6.59 (m, 0.5H), 6.59 – 6.47 (m, 1.4H), 5.94 (s, 0.7H), 5.72 (d,  $J$  = 7.4 Hz, 0.8H), 4.59 – 4.26 (m, 1H), 1.96 – 1.49 (m, 6.5H), 1.39 – 1.09 (m, 1.5H).

**$^{13}\text{C}$  NMR (101 MHz,  $\text{CDCl}_3$ )**  $\delta$  180.22, 179.72, 159.15, 158.91, 158.06, 140.87, 140.74, 138.77, 138.57, 129.10, 128.66, 128.58, 128.53, 128.37, 128.21, 128.12, 127.89, 127.79, 127.62, 127.05, 126.25, 124.35, 123.17, 122.45,

122.35, 122.03, 120.26, 119.63, 119.35, 110.72, 110.14, 109.85, 109.67, 109.57, 102.16, 99.42, 99.18, 58.42, 55.29, 54.45, 49.77, 42.46, 41.70, 35.46, 33.20, 32.73, 30.95, 30.39, 28.26, 27.24, 26.31, 25.49, 25.32, 24.93, 24.71, 24.25, 23.78, 22.10, 21.54.

**HRMS (ESI)** calcd for  $C_{26}H_{23}NO_2$  ( $M+Na$ )<sup>+</sup>: 404.1621, found: 404.1625.

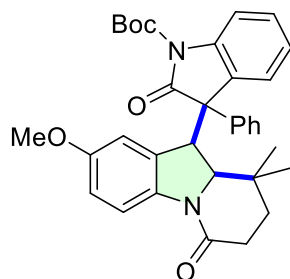

**<sup>1</sup>H NMR (400 MHz, CDCl<sub>3</sub>)** δ 8.02 (d, *J* = 8.8 Hz, 0.5H), 7.88 (d, *J* = 8.1 Hz, 0.5H), 7.80 (d, *J* = 8.8 Hz, 0.5H), 7.78 – 7.74 (m, 1H), 7.67 – 7.54 (m, 1.5H), 7.46 – 7.30 (m, 4H), 7.19 (t, *J* = 7.9 Hz, 0.5H), 7.09 (t, *J* = 7.6 Hz, 0.5H), 7.00 (t, *J* = 7.2 Hz, 0.5H), 6.78 (dd, *J* = 8.8, 2.6 Hz, 0.5H), 6.72 (d, *J* = 2.5 Hz, 0.5H), 6.55 (dd, *J* = 8.8, 2.6 Hz, 0.5H), 6.01 (d, *J* = 7.5 Hz, 0.5H), 5.52 (d, *J* = 2.6 Hz, 0.5H), 4.47 (d, 0.5H), 4.33 (d, 0.5H), 3.91 (d, 0.5H), 3.67 (s, 1.5H), 3.38 (s, 1.5H), 3.07 (d, *J* = 7.0 Hz, 0.5H), 2.65 – 2.36 (m, 1H), 2.32 – 2.02 (m, 1H), 1.64 (s, 4.5H), 1.64 (s, 4.5H), 1.55 – 1.40 (m, 2H), 1.14 (s, 1.5H), 0.68 (s, 1.5H), 0.57 (s, 1.5H), 0.50 (s, 1.5H).

**<sup>13</sup>C NMR (101 MHz, CDCl<sub>3</sub>)** δ 176.34, 174.73, 169.36, 169.16, 155.91, 155.21, 148.89, 148.69, 139.94, 139.34, 138.72, 137.48, 137.12, 135.30, 129.76, 129.30, 129.06, 128.89, 128.63, 128.54, 128.33, 128.22, 126.94, 125.56, 125.42, 124.36, 123.79, 115.85, 115.76, 115.44, 114.75, 114.63, 114.49, 110.00, 108.70, 84.75, 84.68, 68.87, 68.31, 60.90, 59.94, 55.41, 55.05, 51.79, 50.91, 35.38, 35.21, 34.79, 34.36, 31.22, 30.68, 28.09, 28.03, 26.55, 25.64, 24.96, 21.88, 21.86.

**HRMS (ESI)** calcd for  $C_{34}H_{36}N_2O_5$  ( $M+Na$ )<sup>+</sup>: 575.2516, found: 575.2519.

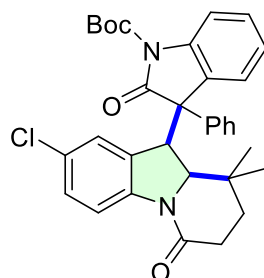

**<sup>1</sup>H NMR (400 MHz, CDCl<sub>3</sub>)** δ 8.03 (d, *J* = 8.6 Hz, 0.5H), 7.87 (d, *J* = 8.1 Hz, 0.5H), 7.77 (d, *J* = 8.7 Hz, 0.5H), 7.76 – 7.71 (m, 1H), 7.63 (d, *J* = 7.8 Hz, 0.5H), 7.60 – 7.49 (m, 1H), 7.46 – 7.27 (m, 4H), 7.23 – 7.15 (m, 1H), 7.14 – 7.11 (d, *J* = 2.0 Hz, 0.5H), 7.08 (t, *J* = 8.1, 7.1 Hz, 0.5H), 7.00 (t, *J* = 7.6 Hz, 0.5H), 6.95 (dd, *J* = 8.6, 2.1 Hz, 0.5H), 6.06 (d, *J* = 7.5 Hz, 0.5H), 5.80 (d, *J* = 1.9 Hz, 0.5H), 4.43 (d, *J* = 2.7 Hz, 0.5H), 4.29 (d, *J* = 2.1 Hz, 0.5H), 3.91 (d, *J* = 2.3 Hz, 0.5H), 3.10 (d, *J* = 2.8 Hz, 0.5H), 2.61 – 2.36 (m, 1H), 2.35 – 2.05 (m, 1H), 1.66 (s, 4.5H), 1.61 (s, 4.5H), 1.55 – 1.38 (m, 2H), 1.11 (s, 1.5H), 0.65 (s, 1.5H), 0.54 (s, 1.5H), 0.52 (s, 1.5H).

**<sup>13</sup>C NMR (101 MHz, CDCl<sub>3</sub>)** δ 175.96, 174.51, 169.97, 169.87, 148.83, 148.53, 143.38, 142.22, 139.98, 139.46, 136.44, 134.89, 130.22, 130.02, 129.45, 129.15, 129.06, 128.78, 128.74, 128.65, 128.59, 128.55, 128.45, 128.11, 127.65, 126.68, 125.58, 125.33, 125.08, 124.39, 123.79, 123.66, 115.87, 115.78, 114.83, 114.79, 84.97, 84.85, 68.96, 68.47, 60.66, 59.74, 51.64, 50.66, 35.39, 35.22, 34.56, 34.12, 31.30, 30.79, 28.08, 28.05, 26.57, 26.46, 21.95, 21.89.

**HRMS (ESI)** calcd for  $C_{33}H_{33}ClN_2O_4$  ( $M+Na$ )<sup>+</sup>: 579.2021, found: 579.2027.

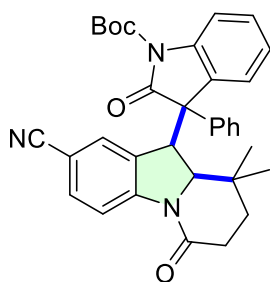

**<sup>1</sup>H NMR (400 MHz, CDCl<sub>3</sub>)** δ 8.17 (d, *J* = 8.5 Hz, 0.4H), 7.92 (d, *J* = 8.4 Hz, 0.6H), 7.88 (d, *J* = 8.2 Hz, 0.4H), 7.76 – 7.70 (m, 1.2H), 7.61 (d, *J* = 8.1 Hz, 0.6H), 7.58 – 7.49 (m, 1H), 7.46 – 7.27 (m, 5H), 7.20 (t, *J* = 8.5 Hz, 0.6H), 7.08 (t, *J* = 8.0 Hz, 0.6H), 7.01 (t, *J* = 7.6 Hz, 0.4H), 6.11 (d, 0.4H), 6.02 (d, *J* = 7.5 Hz, 0.4H), 4.45 (d, 0.4H), 4.33 (d, 0.6H), 3.96 (d, *J* = 2.4 Hz, 0.6H), 3.17 (d, *J* = 2.4 Hz, 0.4H), 2.64 – 2.39 (m, 1.2H), 2.35 – 2.09 (m, 0.8H), 1.67 (s, 5.5H), 1.61 (s, 3.5H), 1.58 – 1.40 (m, 2H), 1.11 (s, 1.2H), 0.64 (s, 1.2H), 0.54 (s, 1.8H), 0.48 (s, 1.8H).

**<sup>13</sup>C NMR (101 MHz, CDCl<sub>3</sub>)** δ 175.74, 174.27, 170.61, 170.55, 148.75, 148.39, 148.00, 146.92, 140.04, 139.40, 135.94, 134.48, 134.21, 133.96, 129.69, 129.59, 129.39, 129.01, 128.74, 128.66, 128.58, 127.18, 126.28, 125.21, 124.77, 124.48, 123.90, 118.92, 115.20, 115.05, 114.88, 106.09, 105.72, 85.54, 85.05, 69.08, 68.63, 60.55, 59.60, 51.24, 50.34, 35.33, 35.18, 34.28, 33.84, 31.40, 30.93, 28.08, 28.04, 26.50, 26.38, 21.90.

**HRMS (ESI)** calcd for C<sub>34</sub>H<sub>33</sub>N<sub>3</sub>O<sub>4</sub> (M+H)<sup>+</sup>: 548.2544, found: 548.2548.

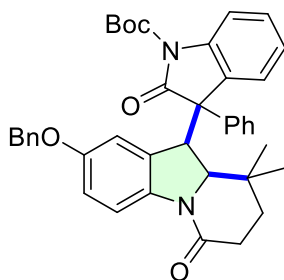

**<sup>1</sup>H NMR (400 MHz, CDCl<sub>3</sub>)** δ 8.01 (d, *J* = 8.8 Hz, 0.5H), 7.87 (d, *J* = 8.2 Hz, 0.5H), 7.81 – 7.73 (m, 1.5H), 7.69 – 7.48 (m, 1.5 H), 7.47 – 7.27 (m, 9H), 7.19 (t, *J* = 7.8 Hz, 0.5H), 7.08 (t, *J* = 7.5 Hz, 0.5H), 6.98 (t, *J* = 7.6 Hz, 0.5H), 6.86 (dd, *J* = 8.9 Hz, 0.5H), 6.83 (m, 0.5H), 6.60 (dd, *J* = 8.8, 2.0 Hz, 0.5H), 5.98 (d, *J* = 7.5 Hz, 0.5H), 5.60 (d, *J* = 0.9 Hz, 0.5H), 4.95 – 4.78 (m, 1H), 4.58 (d, *J* = 11.6 Hz, 0.5H), 4.52 – 4.39 (m, 1H), 4.33 (s, 0.5H), 3.90 (s, 0.5H), 3.07 (s, 0.5H), 2.61 – 2.35 (m, 1H), 2.29 – 2.01 (m, 1H), 1.62 (s, 5H), 1.57 (s, 4H), 1.54 – 1.38 (m, 2H), 1.13 (s, 1.5H), 0.67 (s, 1.5H), 0.56 (s, 1.5H), 0.49 (s, 1.5H).

**<sup>13</sup>C NMR (151 MHz, CDCl<sub>3</sub>)** δ 176.37, 174.76, 169.45, 169.23, 155.14, 154.37, 148.91, 148.76, 139.95, 139.39, 138.97, 137.71, 137.18, 136.87, 136.84, 135.30, 129.89, 129.34, 129.21, 129.09, 128.94, 128.70, 128.58, 128.48, 128.45, 128.37, 128.26, 127.92, 127.90, 127.63, 127.52, 126.98, 125.58, 125.45, 124.42, 123.84, 116.80, 115.84, 115.81, 115.08, 114.80, 114.66, 111.03, 110.10, 84.79, 84.76, 70.33, 69.96, 68.90, 68.33, 60.90, 59.98, 51.78, 50.90, 35.41, 35.22, 34.78, 34.34, 31.24, 30.70, 28.11, 28.03, 26.58, 21.92, 21.88.

**HRMS (ESI)** calcd for C<sub>40</sub>H<sub>40</sub>N<sub>2</sub>O<sub>5</sub> (M+Na)<sup>+</sup>: 651.2829, found: 651.2834.

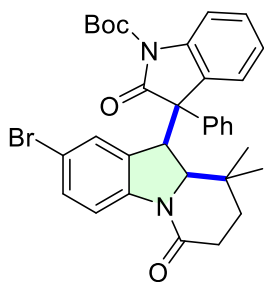

**<sup>1</sup>H NMR (400 MHz, CDCl<sub>3</sub>)** δ 7.98 (d, *J* = 8.6 Hz, 0.5H), 7.87 (d, *J* = 8.2 Hz, 0.5H), 7.78 – 7.68 (m, 1.5H), 7.64 (d, *J* = 8.1 Hz, 0.5H), 7.56 (s, 1H), 7.46 – 7.27 (m, 5H), 7.19 (t, *J* = 7.4 Hz, 0.5H), 7.13 – 6.97 (m, 1H), 6.06 (d, *J* = 7.5 Hz, 0.5H), 5.93 (d, *J* = 1.5 Hz, 0.5H), 4.42 (d, *J* = 2.5 Hz, 0.5H), 4.29 (d, *J* = 1.8 Hz, 0.5H), 3.90 (d, *J* = 2.2 Hz, 0.5H), 3.09 (d, *J* = 2.6 Hz, 0.5H), 2.64 – 2.34 (m, 1H), 2.34 – 1.96 (m, 1H), 1.67 (s, 4.5H), 1.61 (s, 4.5H), 1.58 – 1.36 (m, 2H), 1.11 (s, 1.5H), 0.65 (s, 1.5H), 0.54 (s, 1.5H), 0.52 (s, 1.5H).

**<sup>13</sup>C NMR (101 MHz, CDCl<sub>3</sub>)** δ 176.03, 174.62, 170.14, 170.03, 148.93, 148.62, 143.91, 142.77, 140.09, 139.57, 136.52, 134.99, 132.12, 131.80, 130.74, 130.50, 129.56, 129.28, 129.17, 128.86, 128.84, 128.77, 128.71, 128.65, 128.56, 126.79, 126.63, 125.42, 125.18, 124.50, 123.89, 116.44, 116.35, 115.72, 115.26, 114.94, 114.91, 85.10, 84.97, 69.04, 68.53, 60.78, 59.84, 51.71, 50.83, 35.49, 35.31, 34.64, 34.20, 31.43, 30.93, 28.24, 28.21, 26.69, 26.57, 22.03, 21.95.

**HRMS (ESI)** calcd for C<sub>33</sub>H<sub>33</sub>BrN<sub>2</sub>O<sub>4</sub> (M+Na)<sup>+</sup>: 623.1516, found: 623.1519.

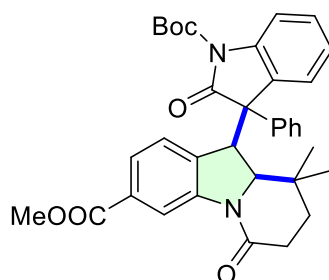

**<sup>1</sup>H NMR (400 MHz, CDCl<sub>3</sub>)** δ 8.71 (d, *J* = 1.4 Hz, 0.5H), 8.50 (d, *J* = 1.4 Hz, 0.5H), 7.89 (d, *J* = 8.1 Hz, 0.5H), 7.79 – 7.73 (m, 1H), 7.63 – 7.50 (m, 2H), 7.48 – 7.30 (m, 4.5H), 7.25 – 7.14 (m, 1H), 7.08 (t, *J* = 8.1 Hz, 0.5H), 7.00 (t, *J* = 7.7 Hz, 0.5H), 6.03 (d, *J* = 8.0 Hz, 0.5H), 5.99 (d, *J* = 7.5 Hz, 0.5H), 4.53 (d, *J* = 2.7 Hz, 0.5H), 4.39 (d, *J* = 2.3 Hz, 0.5H), 3.98 (d, *J* = 2.5 Hz, 0.5H), 3.90 (s, 1.5H), 3.84 (s, 1.5H), 3.16 (d, *J* = 2.7 Hz, 0.5H), 2.66 – 2.41 (m, 1H), 2.37 – 2.12 (m, 1H), 1.66 (s, 4.5H), 1.64 (s, 4.5H), 1.58 – 1.45 (m, 1.5H), 1.15 (s, 1.5H), 0.67 (s, 1.5H), 0.55 (s, 1.5H), 0.51 (s, 1.5H).

**<sup>13</sup>C NMR (101 MHz, CDCl<sub>3</sub>)** δ 176.25, 174.65, 170.24, 170.08, 167.04, 166.87, 148.96, 145.11, 143.96, 140.09, 139.43, 136.65, 135.11, 133.80, 133.45, 131.38, 130.97, 129.59, 129.27, 129.18, 128.86, 128.76, 128.61, 126.73, 125.36, 125.27, 124.67, 124.57, 124.03, 123.34, 115.86, 115.61, 115.14, 114.93, 85.00, 69.06, 68.53, 60.88, 59.94, 52.28, 52.16, 51.55, 50.82, 35.52, 35.38, 34.67, 34.24, 31.50, 31.02, 28.24, 28.21, 26.58, 22.03, 21.95.

**HRMS (ESI)** calcd for C<sub>35</sub>H<sub>36</sub>N<sub>2</sub>O<sub>6</sub> (M+Na)<sup>+</sup>: 603.2466, found: 603.2471.

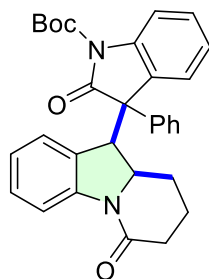

**<sup>1</sup>H NMR (400 MHz, CDCl<sub>3</sub>)** δ 8.23 – 8.07 (m, 0.6H), 8.02 – 7.81 (m, 1.3H), 7.72 (d, *J* = 8.1 Hz, 0.4H), 7.61 – 7.45 (m, 1.2H), 7.45 – 7.28 (m, 3.7H), 7.25 – 7.12 (m, 2.6H), 7.09 – 6.98 (m, 1.6H), 6.91 – 6.70 (m, 1.2H), 6.55 – 5.71 (m, 1H), 4.72 – 3.31 (m, 2H), 2.69 – 2.07 (m, 2H), 1.76 – 1.65 (m, 1H), 1.66 – 1.57 (m, 9H), 1.57 – 1.48 (m, 1H), 1.48 – 1.36 (m, 1H), 1.30 – 0.95 (m, 1H).

**<sup>13</sup>C NMR (101 MHz, CDCl<sub>3</sub>)** δ 176.01, 175.14, 169.94, 169.00, 167.82, 167.72, 148.87, 148.73, 143.72, 143.29, 142.45, 142.22, 140.15, 139.86, 139.67, 139.08, 137.64, 137.57, 136.54, 133.99, 129.74, 129.28, 129.24, 128.96, 128.92, 128.87, 128.84, 128.65, 128.49, 128.42, 128.24, 128.22, 128.10, 126.76, 126.59, 125.98, 125.82, 125.03,

124.79, 124.76, 124.39, 124.28, 123.76, 123.68, 123.59, 123.54, 123.44, 123.19, 117.47, 117.24, 116.94, 116.29, 115.25, 115.14, 115.10, 114.72, 84.93, 84.81, 84.55, 65.10, 64.48, 62.32, 61.73, 61.50, 60.87, 60.42, 59.81, 58.77, 57.24, 55.12, 54.56, 51.30, 51.12, 36.11, 32.55, 32.24, 32.13, 31.96, 29.80, 29.36, 28.12, 28.08, 27.88, 27.79, 26.66, 23.77, 21.46, 21.10, 20.99, 19.31, 18.08, 14.24.

**HRMS (ESI)** calcd for  $C_{31}H_{30}N_2O_4$  ( $M+Na$ )<sup>+</sup>: 517.2098, found: 517.2101.

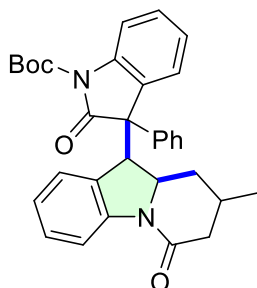

**<sup>1</sup>H NMR (400 MHz, CDCl<sub>3</sub>)** δ 8.13 – 7.96 (m, 0.8H), 7.95 – 7.72 (m, 0.9H), 7.71 – 7.60 (m, 0.4H), 7.58 – 7.20 (m, 5H), 7.17 – 7.03 (m, 1.2H), 7.03 – 6.60 (m, 3H), 6.54 – 5.70 (m, 1.2H), 4.64 – 3.30 (m, 2H), 2.65 – 2.22 (m, 1H), 2.20 – 1.67 (m, 3.8H), 1.64 – 1.49 (m, 9H), 1.48 – 1.29 (m, 0.7H), 1.03 – 0.63 (m, 3H).

**<sup>13</sup>C NMR (101 MHz, CDCl<sub>3</sub>)** δ 180.00, 174.88, 170.14, 169.44, 168.23, 148.88, 143.10, 142.05, 139.71, 137.25, 129.33, 129.03, 128.85, 128.78, 128.52, 128.43, 128.37, 128.31, 128.25, 128.16, 126.90, 126.61, 124.93, 124.83, 124.74, 124.35, 124.25, 123.65, 123.48, 123.31, 123.12, 117.62, 117.12, 116.37, 115.98, 115.06, 114.93, 84.85, 84.79, 62.58, 62.23, 60.10, 59.39, 59.05, 58.40, 58.27, 55.03, 54.94, 54.81, 54.39, 51.12, 41.15, 40.59, 40.45, 38.80, 38.62, 37.95, 37.40, 28.12, 28.08, 28.07, 27.71, 26.62, 24.33, 24.02, 22.56, 22.01, 21.95, 21.67, 21.19.

**HRMS (ESI)** calcd for  $C_{32}H_{32}N_2O_4$  ( $M+H$ )<sup>+</sup>: 509.2435, found: 509.2438.

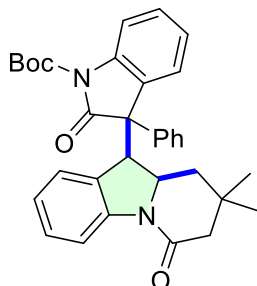

**<sup>1</sup>H NMR (400 MHz, CDCl<sub>3</sub>)** δ 8.14 – 7.94 (m, 0.6H), 7.92 – 7.72 (m, 1.5H), 7.72 – 7.61 (m, 1H), 7.60 – 7.20 (m, 5H), 7.18 – 7.05 (m, 1.3H), 7.02 – 6.88 (m, 1.3H), 6.83 (d,  $J$  = 7.6 Hz, 0.4H), 6.68 (m, 1H), 6.42 (d,  $J$  = 7.2 Hz, 0.4H), 6.13 – 5.99 (m, 0.6H), 5.80 (d,  $J$  = 7.5 Hz, 0.2H), 4.55 – 4.32 (m, 1H), 4.28 (m, 0.2H), 4.09 – 3.93 (m, 0.4H), 3.51 – 3.31 (m, 0.4H), 2.27 – 1.91 (m, 2H), 1.64 – 1.49 (m, 9H), 1.42 – 1.20 (m, 2H), 1.00 – 0.63 (m, 6H).

**<sup>13</sup>C NMR (101 MHz, CDCl<sub>3</sub>)** δ 175.99, 174.86, 169.83, 168.76, 148.87, 143.01, 141.93, 140.20, 139.69, 137.28, 136.55, 134.24, 129.36, 128.92, 128.78, 128.72, 128.38, 128.35, 128.30, 128.20, 126.66, 126.57, 125.97, 124.94, 124.87, 124.74, 124.32, 124.22, 123.54, 123.49, 123.28, 117.60, 116.70, 116.14, 115.08, 114.87, 84.85, 84.80, 60.82, 59.89, 59.22, 58.73, 54.84, 54.56, 51.33, 47.65, 46.93, 45.95, 45.88, 44.11, 36.01, 31.60, 31.44, 30.88, 30.23, 30.12, 30.02, 29.70, 28.48, 28.11, 28.07, 26.92, 24.49.

**HRMS (ESI)** calcd for  $C_{33}H_{34}N_2O_4$  ( $M+Na$ )<sup>+</sup>: 545.2411, found: 545.2410.

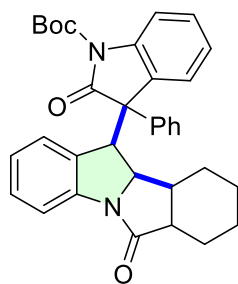

**<sup>1</sup>H NMR (400 MHz, CDCl<sub>3</sub>)** δ 7.91 (d, *J* = 8.1 Hz, 0.5H), 7.81 (d, *J* = 7.8 Hz, 0.5H), 7.61 (d, *J* = 7.8 Hz, 0.5H), 7.51 (d, *J* = 7.9 Hz, 0.5H), 7.49 – 7.45 (m, 1.5H), 7.44 – 7.30 (m, 4.5H), 7.27 – 7.17 (m, 1H), 7.11 – 7.00 (m, 1.5H), 6.82 (d, *J* = 7.6 Hz, 0.5H), 6.79 – 6.71 (m, 1H), 6.62 (s, 0.5H), 6.11 (d, *J* = 7.6 Hz, 0.5H), 4.96 – 4.84 (m, 1H), 4.47 – 4.38 (m, 0.5H), 3.82 (s, 0.5H), 2.89 – 2.74 (m, 1H), 2.42 – 2.04 (m, 2H), 1.88 – 1.68 (m, 2H), 1.67 (s, 4.5H), 1.64 (s, 4.5H), 1.62 – 1.46 (m, 1H), 1.46 – 1.33 (m, 1H) 1.24 – 0.75 (m, 3H).

**<sup>13</sup>C NMR (101 MHz, CDCl<sub>3</sub>)** δ 176.14, 175.37, 174.60, 173.05, 148.97, 148.84, 141.45, 139.80, 137.71, 137.60, 132.09, 131.63, 129.19, 128.93, 128.85, 128.71, 128.38, 128.31, 128.13, 127.95, 127.35, 125.40, 125.10, 124.64, 124.34, 123.49, 123.45, 123.29, 115.10, 114.52, 114.14, 84.88, 84.80, 66.36, 65.63, 59.43, 58.81, 48.65, 47.98, 46.58, 46.14, 41.33, 39.86, 28.11, 23.99, 23.91, 23.82, 23.34, 22.74, 22.61, 22.47, 22.26.

**HRMS (ESI)** calcd for C<sub>34</sub>H<sub>34</sub>N<sub>2</sub>O<sub>44</sub> (M+Na)<sup>+</sup>: 557.2411, found: 557.2410.

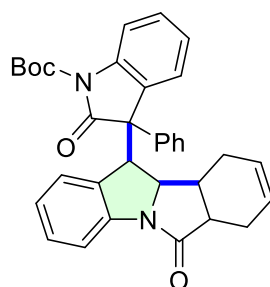

**<sup>1</sup>H NMR (400 MHz, CDCl<sub>3</sub>)** δ 7.92 (d, *J* = 8.2 Hz, 0.5H), 7.80 (d, *J* = 8.2 Hz, 0.5H), 7.58 (d, *J* = 7.8 Hz, 0.5H), 7.52 – 7.44 (m, 2H), 7.44 – 7.28 (m, 4.5H), 7.24 – 7.14 (m, 1H), 7.11 – 6.97 (m, 1.5H), 6.81 (d, *J* = 7.5 Hz, 0.5H), 6.74 (m, 1H), 6.61 (s, 0.5H), 6.08 (d, *J* = 7.5 Hz, 0.5H), 5.73 – 5.55 (m, 2H), 4.95 – 4.79 (m, 1H), 4.58 – 4.44 (m, 0.5H), 3.90 (s, 0.5H), 2.99 – 2.88 (m, 1H), 2.67 – 2.53 (m, 1H), 2.52 – 2.36 (m, 1H), 2.34 – 1.93 (m, 2H), 1.65 (s, 4.5H), 1.86 – 1.51 (m, 1H), 1.61 (s, 4.5H).

**<sup>13</sup>C NMR (101 MHz, CDCl<sub>3</sub>)** δ 176.14, 175.40, 174.79, 173.39, 148.98, 148.88, 141.64, 139.84, 137.57, 131.95, 131.55, 129.27, 128.99, 128.96, 128.80, 128.45, 128.42, 128.39, 128.11, 127.96, 127.29, 125.41, 125.28, 125.09, 124.71, 124.43, 123.91, 123.64, 123.62, 123.46, 123.42, 115.21, 115.18, 114.60, 114.27, 84.93, 84.87, 66.95, 66.24, 59.39, 58.84, 49.16, 48.45, 44.31, 43.90, 37.44, 36.16, 28.12, 28.10, 21.24, 21.19, 21.18, 20.71.

**HRMS (ESI)** calcd for C<sub>34</sub>H<sub>32</sub>N<sub>2</sub>O<sub>4</sub> (M+H)<sup>+</sup>: 533.2435, found: 533.2444.

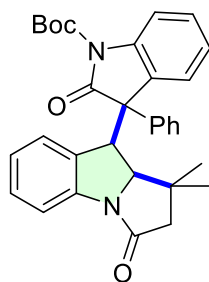

**<sup>1</sup>H NMR (400 MHz, CDCl<sub>3</sub>)** δ 7.97 (d, *J* = 8.0 Hz, 0.5H), 7.72 – 7.63 (m, 1.5H), 7.57 (d, *J* = 7.8 Hz, 0.5H), 7.48 – 7.29 (m, 5H), 7.23 – 7.14 (m, 1H), 7.10 – 6.94 (m, 2H), 6.81 – 6.65 (m, 1H), 6.26 (d, *J* = 7.5 Hz, 0.5H), 5.97 (d, *J* = 7.8 Hz, 1H), 4.84 (d, *J* = 6.7 Hz, 0.5H), 4.62 (d, *J* = 4.9 Hz, 0.5H), 4.30 (d, *J* = 4.9 Hz, 0.5H), 3.51 (d, *J* = 6.6 Hz, 0.5H), 2.62 – 2.46 (m, 1H), 2.17 – 2.00 (m, 1H), 1.64 (s, 4.5H), 1.60 (s, 4.5H), 1.16 (s, 1.5H), 1.09 (s, 1.5H), 0.81 (s, 1.5H), 0.40 (s, 1.5H).

**<sup>13</sup>C NMR (101 MHz, CDCl<sub>3</sub>)** δ 176.48, 175.49, 175.39, 172.79, 148.96, 148.82, 142.27, 141.70, 140.42, 139.52, 137.54, 136.57, 131.43, 130.60, 129.31, 128.90, 128.84, 128.81, 128.59, 128.54, 128.50, 128.43, 128.41, 126.71, 126.52, 126.34, 125.61, 125.55, 124.63, 123.98, 123.50, 123.35, 115.20, 115.00, 114.25, 113.90, 84.73, 72.91, 72.80, 59.97, 59.41, 51.27, 50.89, 50.41, 49.60, 42.70, 41.23, 28.12, 28.02, 24.12, 23.07, 22.04, 20.86.

**HRMS (ESI)** calcd for C<sub>32</sub>H<sub>32</sub>N<sub>2</sub>O<sub>4</sub> (M+Na)<sup>+</sup>: 531.2254, found: 531.2255.

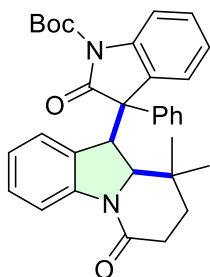

**<sup>1</sup>H NMR (400 MHz, CDCl<sub>3</sub>)** δ 8.09 (d, *J* = 8.0 Hz, 0.5H), 7.88 – 7.83 (m, 1H), 7.78 – 7.73 (m, 0.5H), 7.60 – 7.51 (m, 1.5H), 7.41 – 7.28 (m, 4H), 7.24 – 6.92 (m, 3H), 6.81 – 6.74 (m, 0.5H), 6.72 – 6.65 (m, 0.5H), 5.97 (d, *J* = 7.7 Hz, 0.5H), 5.92 (d, *J* = 7.4 Hz, 0.5H), 4.50 (d, *J* = 2.7 Hz, 0.5H), 4.35 (d, *J* = 2.2 Hz, 0.5H), 3.89 (d, *J* = 2.4 Hz, 0.5H), 3.08 (d, *J* = 2.8 Hz, 0.5H), 2.60 – 2.36 (m, 1H), 2.33 – 2.08 (m, 1H), 1.66 (s, 4.5H), 1.64 (s, 4.5H), 1.58 – 1.37 (m, 2H), 1.16 (s, 1.5H), 0.68 (s, 1.5H), 0.57 (s, 11.5H), 0.53 (s, 1.5H).

**<sup>13</sup>C NMR (101 MHz, CDCl<sub>3</sub>)** δ 176.32, 174.79, 170.03, 169.89, 148.92, 144.75, 143.54, 139.96, 139.40, 136.98, 135.29, 129.27, 129.21, 129.10, 128.85, 128.79, 128.56, 128.53, 128.45, 128.31, 128.24, 128.12, 126.83, 125.57, 125.36, 125.33, 125.22, 124.32, 123.74, 123.25, 123.13, 122.77, 115.08, 115.04, 114.82, 114.61, 84.73, 84.59, 68.53, 68.06, 60.99, 60.08, 51.70, 50.69, 35.36, 35.23, 34.65, 34.22, 31.49, 30.98, 28.09, 26.60, 26.58, 22.03.

**HRMS (ESI)** calcd for C<sub>33</sub>H<sub>34</sub>N<sub>2</sub>O<sub>4</sub> (M+Na)<sup>+</sup>: 545.2411, found: 545.2407.

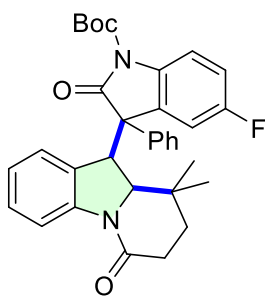

**<sup>1</sup>H NMR (400 MHz, CDCl<sub>3</sub>)** δ 8.12 (d, *J* = 8.1 Hz, 0.5H), 7.91 (d, *J* = 8.1 Hz, 0.5H), 7.89 – 7.83 (m, 1H), 7.78 – 7.69 (m, 1H), 7.52 (s, 1H), 7.43 – 7.29 (m, 3H), 7.23 (d, *J* = 7.8 Hz, 0.5H), 7.14 – 6.97 (m, 2H), 6.86 (t, *J* = 8.8 Hz, 0.5H), 6.78 (t, *J* = 7.5 Hz, 0.5H), 6.70 (t, *J* = 7.5 Hz, 0.5H), 5.97 (d, *J* = 7.6 Hz, 0.5H), 5.56 (d, *J* = 7.8 Hz, 0.5H), 4.51 (d, *J* = 1.6 Hz, 0.5H), 4.35 (d, *J* = 1.8 Hz, 0.5H), 3.82 (d, *J* = 1.4 Hz, 0.5H), 3.10 (d, *J* = 1.9 Hz, 0.5H), 2.67 – 2.37 (m, 1H), 2.37 – 2.09 (m, 1H), 1.63 (s, 4.5H), 1.60 (s, 4.5H), 1.54 – 1.37 (m, 2H), 1.13 (s, 1.5H), 0.66 (s, 1.5H), 0.54 (s, 1.5H), 0.51 (s, 1.5H).

**<sup>13</sup>C NMR (101 MHz, CDCl<sub>3</sub>)** δ 175.93, 174.38, 170.06, 169.91, 158.02, 157.85, 148.87, 148.65, 144.75, 143.58, 136.50, 136.02, 135.44, 134.71, 134.30, 132.71, 129.57, 129.10, 128.91, 128.73, 128.70, 128.60, 128.55, 128.46,

128.07, 127.53, 125.07, 123.58, 123.22, 123.20, 122.96, 116.17, 116.11, 116.04, 115.95, 115.88, 115.64, 115.35, 115.31, 114.45, 114.20, 113.03, 112.78, 84.97, 84.83, 68.47, 68.01, 61.29, 60.32, 51.70, 50.68, 35.42, 35.31, 34.64, 34.17, 31.38, 30.97, 28.10, 26.61, 21.89, 21.87.

**HRMS (ESI)** calcd for  $C_{33}H_{33}FN_2O_4$  ( $M+Na$ )<sup>+</sup>: 563.2317, found: 563.2318.

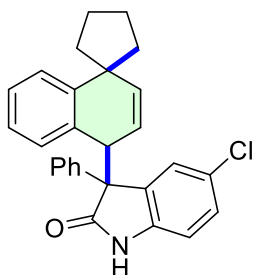

**<sup>1</sup>H NMR (400 MHz, DMSO-*d*<sub>6</sub>)** δ 10.64 (d, *J* = 3.6 Hz, 1H), 7.69 – 7.18 (m, 8H), 7.18 – 7.10 (m, 1H), 7.10 – 7.00 (m, 1H), 6.95 (td, *J* = 7.5, 7.1, 1.4 Hz, 0H), 6.85 (d, *J* = 8.3 Hz, 1H), 6.81 – 6.73 (m, 1H), 6.63 (d, *J* = 8.3 Hz, 0H), 6.16 (dd, *J* = 8.0, 1.4 Hz, 1H), 5.89 (dd, *J* = 10.4, 1.6 Hz, 0H), 5.78 – 5.61 (m, 1H), 5.40 – 5.24 (m, 1H), 4.70 (dd, *J* = 4.0, 1.5 Hz, 0H), 4.58 (d, *J* = 3.8 Hz, 1H), 2.18 – 1.37 (m, 8H).

**<sup>13</sup>C NMR (101 MHz, DMSO-*d*<sub>6</sub>)** δ 179.32, 178.05, 146.32, 142.03, 138.69, 138.51, 138.32, 138.04, 132.81, 132.39, 131.20, 130.02, 129.07, 128.87, 128.55, 128.47, 128.05, 127.89, 127.84, 127.80, 127.58, 127.51, 127.23, 127.18, 127.13, 126.88, 125.33, 125.26, 124.81, 119.26, 119.05, 111.16, 111.06, 62.67, 61.97, 47.01, 45.89, 45.76, 45.35, 45.11, 44.06, 44.01, 27.12, 26.39, 26.30, 26.24.

**HRMS (ESI)** calcd for  $C_{28}H_{24}ClNO$  ( $M+H$ )<sup>+</sup>: 426.1619, found: 426.1620.

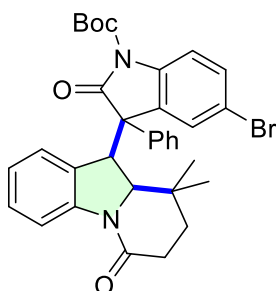

**<sup>1</sup>H NMR (400 MHz, CDCl<sub>3</sub>)** δ 7.91 (d, *J* = 8.0 Hz, 1H), 7.71 (d, *J* = 7.1 Hz, 2H), 7.48 (d, *J* = 8.8 Hz, 1H), 7.45 – 7.32 (m, 4H), 7.28 (dd, *J* = 8.8, 2.0 Hz, 1H), 7.11 – 6.99 (m, 2H), 6.78 (t, *J* = 7.5 Hz, 1H), 4.32 (d, *J* = 1.7 Hz, 1H), 3.79 (d, *J* = 2.1 Hz, 1H), 2.68 – 2.35 (m, 2H), 1.62 (s, 9H), 1.57 – 1.33 (m, 2H), 0.53 (s, 6H).

**<sup>13</sup>C NMR (101 MHz, CDCl<sub>3</sub>)** δ 175.49, 169.95, 148.51, 143.58, 138.51, 134.61, 131.77, 129.22, 128.95, 128.76, 128.62, 128.52, 127.91, 127.76, 123.16, 123.12, 116.76, 116.36, 115.29, 85.03, 68.10, 61.18, 51.80, 35.42, 34.17, 31.42, 28.10, 26.71, 22.11.

**HRMS (ESI)** calcd for  $C_{33}H_{33}BrN_2O_4$  ( $M+Na$ )<sup>+</sup>: 623.1516, found: 623.1518.

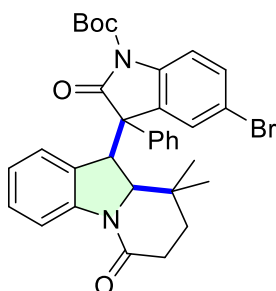



**<sup>1</sup>H NMR (600 MHz, CDCl<sub>3</sub>)** δ 8.03 (d, *J* = 8.1 Hz, 1H), 7.66 (d, *J* = 8.8 Hz, 1H), 7.42 (s, 2H), 7.35 (d, *J* = 8.7 Hz, 1H), 7.33 – 7.26 (m, *J* = 4.0 Hz, 3H), 7.16 (d, *J* = 15.5 Hz, 1H), 6.61 (t, *J* = 8.2 Hz, 1H), 5.87 (d, *J* = 7.6 Hz, 1H), 5.78 (s, 1H), 4.39 (d, *J* = 2.2 Hz, 1H), 2.98 (d, *J* = 0.7 Hz, 1H), 2.25 – 2.15 (m, 1H), 2.15 – 2.04 (m, 1H), 1.50 (s, 9H), 1.44 – 1.34 (m, 2H), 1.01 (s, 3H), 0.55 (s, 3H).

**<sup>13</sup>C NMR (151 MHz, CDCl<sub>3</sub>)** δ 173.99, 169.82, 148.70, 144.81, 138.99, 136.34, 134.33, 132.22, 129.89, 129.58, 128.79, 128.59, 128.50, 127.49, 124.95, 123.61, 122.99, 117.39, 116.18, 115.29, 85.16, 68.39, 60.28, 50.80, 35.26, 34.60, 31.00, 28.07, 28.07, 26.60, 21.87, 1.04.

**HRMS (ESI)** calcd for C<sub>33</sub>H<sub>33</sub>BrN<sub>2</sub>O<sub>4</sub> (M+Na)<sup>+</sup>: 623.1516, found: 623.1515.

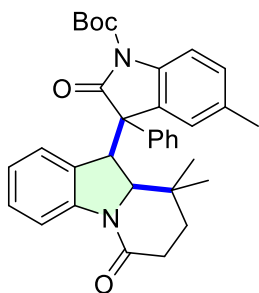

**<sup>1</sup>H NMR (400 MHz, CDCl<sub>3</sub>)** δ 8.20 (s, 0.4H), 8.08 (d, *J* = 8.1 Hz, 0.5H), 7.94 – 7.80 (m, 1H), 7.80 – 7.67 (m, 2H), 7.55 (s, 1H), 7.43 (d, *J* = 8.3 Hz, 0.5H), 7.41 – 7.29 (m, 2.5H), 7.25 – 7.18 (m, 0.5H), 7.14 – 7.04 (m, 1H), 7.03 – 6.90 (m, 1H), 6.76 (t, *J* = 7.4 Hz, 0.5H), 6.69 (t, *J* = 7.4 Hz, 0.5H), 5.99 (d, *J* = 7.5 Hz, 0.5H), 5.58 (s, 0.5H), 4.49 (d, *J* = 1.5 Hz, 0.5H), 4.33 (d, 0.5H), 3.87 (d, 0.5H), 3.06 (d, *J* = 1.6 Hz, 0.5H), 2.66 – 2.38 (m, 1H), 2.28 (s, 1.5H), 2.26 – 2.12 (m, 1H), 2.09 (s, 1.5H), 1.62 (s, 4.5H), 1.60 (s, 4.5H), 1.54 – 1.38 (m, 2H), 1.13 (s, 1.5H), 0.65 (s, 1.5H), 0.54 (s, 1.5H), 0.53 (s, 1.5H).

**<sup>13</sup>C NMR (101 MHz, CDCl<sub>3</sub>)** δ 175.37, 173.90, 168.90, 167.08, 147.93, 147.72, 143.83, 142.46, 136.49, 136.03, 135.98, 134.35, 133.25, 132.78, 132.18, 131.66, 128.62, 128.23, 128.10, 127.80, 127.51, 127.47, 127.44, 127.24, 127.14, 126.46, 125.01, 124.41, 124.14, 122.53, 122.27, 122.03, 121.76, 113.88, 113.47, 113.25, 83.50, 83.36, 67.36, 67.05, 60.00, 59.17, 50.66, 49.67, 34.28, 34.15, 33.57, 33.18, 30.45, 29.97, 27.07, 25.63, 25.55, 21.15, 20.99, 20.27, 20.04.

**HRMS (ESI)** calcd for C<sub>34</sub>H<sub>36</sub>N<sub>2</sub>O<sub>4</sub> (M+Na)<sup>+</sup>: 559.2567, found: 559.2570.

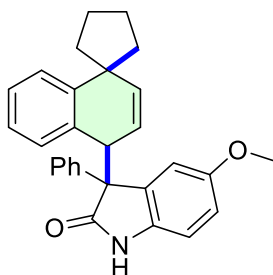

**<sup>1</sup>H NMR (400 MHz, DMSO-*d*<sub>6</sub>)** δ 10.31 (s, 1H), 7.54 (d, *J* = 7.3 Hz, 2H), 7.34 (dd, *J* = 17.6, 8.3 Hz, 4H), 7.21 (t, *J* = 7.5 Hz, 1H), 6.87 – 6.64 (m, 3H), 6.20 (d, *J* = 7.8 Hz, 1H), 5.68 (s, 2H), 5.07 (d, *J* = 2.3 Hz, 1H), 4.56 (d, *J* = 3.1 Hz, 1H), 3.40 (s, 3H), 1.93 – 1.35 (m, 7H), 0.65 – 0.49 (m, 1H).

**<sup>13</sup>C NMR (101 MHz, DMSO-*d*<sub>6</sub>)** δ 178.18, 154.07, 146.23, 139.44, 137.89, 136.41, 133.30, 129.06, 128.71, 128.68, 127.79, 127.74, 127.50, 127.15, 124.71, 119.59, 114.46, 113.78, 110.07, 62.71, 55.34, 47.02, 45.94, 45.06, 44.22, 26.11, 26.04.

**HRMS (ESI)** calcd for C<sub>29</sub>H<sub>27</sub>NO<sub>2</sub> (M+H)<sup>+</sup>: 422.2115, found: 422.2115.

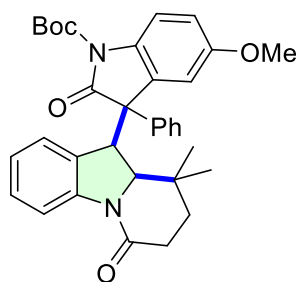

**<sup>1</sup>H NMR (400 MHz, CDCl<sub>3</sub>)** δ 8.12 (d, *J* = 8.0 Hz, 0.6H), 7.89 (d, *J* = 8.0 Hz, 0.5H), 7.82 – 7.72 (m, 1.5H), 7.69 – 7.45 (m, 1.5H), 7.43 – 7.29 (m, 3.3H), 7.21 (t, *J* = 7.4 Hz, 0.7H), 7.10 (d, *J* = 7.5 Hz, 0.5H), 7.01 (t, *J* = 7.7 Hz, 0.5H), 6.91 – 6.82 (m, 1H), 6.78 (t, *J* = 7.1 Hz, 0.5H), 6.73 – 6.66 (m, 1H), 6.01 (d, *J* = 7.6 Hz, 0.6H), 5.42 (d, *J* = 2.5 Hz, 0.6H), 4.53 (d, *J* = 2.6 Hz, 0.6H), 4.36 (d, *J* = 2.0 Hz, 0.4H), 3.86 (d, *J* = 2.2 Hz, 0.4H), 3.72 (s, 1.3H), 3.45 (s, 1.8H), 3.08 (d, *J* = 2.7 Hz, 0.6H), 2.67 – 2.37 (m, 1H), 2.35 – 2.11 (m, 1.3H), 1.62 (s, 3.6H), 1.60 (s, 5.4H), 1.57 – 1.39 (m, 2H), 1.14 (s, 1.8H), 0.67 (s, 1.8H), 0.55 (s, 1.3H), 0.52 (s, 1.3H).

**<sup>13</sup>C NMR (101 MHz, CDCl<sub>3</sub>)** δ 176.40, 174.85, 169.98, 156.27, 155.99, 148.99, 148.78, 144.87, 143.53, 137.07, 135.26, 133.28, 132.85, 129.19, 129.08, 128.92, 128.77, 128.61, 128.57, 128.35, 128.26, 128.18, 126.74, 126.44, 125.27, 123.30, 123.23, 122.91, 115.86, 115.68, 115.10, 114.38, 111.57, 84.52, 84.41, 68.55, 68.06, 61.36, 60.33, 55.82, 55.50, 51.48, 50.47, 35.40, 35.27, 34.62, 34.15, 31.50, 31.03, 28.12, 26.63, 22.11, 21.99.

**HRMS (ESI)** calcd for C<sub>34</sub>H<sub>36</sub>N<sub>2</sub>O<sub>5</sub> (M+Na)<sup>+</sup>: 575.2516, found: 575.2518.

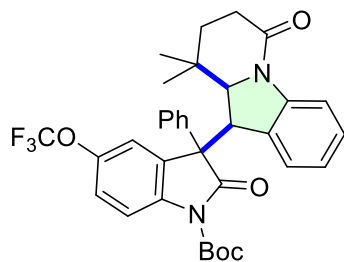

**<sup>1</sup>H NMR (400 MHz, CDCl<sub>3</sub>)** δ 8.11 (d, *J* = 8.1 Hz, 0.5H), 7.97 – 7.86 (m, 1H), 7.71 (m, 1H), 7.64 (d, *J* = 8.9 Hz, 0.5H), 7.60 – 7.32 (m, 4H), 7.25 – 7.14 (m, 1.5H), 7.12 – 6.95 (m, 1.5H), 6.74 (m, 1H), 5.95 (d, *J* = 7.6 Hz, 0.5H), 5.75 (s, 0.5H), 4.51 (d, *J* = 1.7 Hz, 0.5H), 4.36 (d, *J* = 1.8 Hz, 0.5H), 3.83 (d, *J* = 2.1 Hz, 0.5H), 3.06 (d, *J* = 2.9 Hz, 0.5H), 2.62 – 2.37 (m, 1H), 2.35 – 2.09 (m, 1H), 1.63 (s, 4.5H), 1.61 (s, 4.5H), 1.56 – 1.40 (m, 2H), 1.13 (s, 1.5H), 0.65 (s, 1.5H), 0.53 (s, 3H).

**<sup>13</sup>C NMR (101 MHz, CDCl<sub>3</sub>)** δ 175.90, 174.36, 169.97, 169.80, 148.83, 144.80, 143.75, 138.63, 138.10, 136.40, 134.56, 129.64, 129.26, 128.96, 128.92, 128.88, 128.75, 128.66, 128.61, 127.90, 127.35, 125.05, 123.20, 123.11, 123.03, 122.48, 122.11, 120.27, 118.74, 115.98, 115.84, 115.60, 85.35, 85.20, 68.62, 68.16, 61.24, 60.29, 51.94, 50.80, 35.64, 35.42, 34.67, 34.12, 31.39, 31.08, 28.17, 26.83, 26.69, 22.02.

**HRMS (ESI)** calcd for C<sub>34</sub>H<sub>33</sub>F<sub>3</sub>N<sub>2</sub>O<sub>5</sub> (M+H)<sup>+</sup>: 607.2414, found: 607.2424.

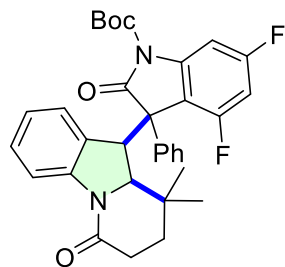

**<sup>1</sup>H NMR (400 MHz, CDCl<sub>3</sub>)** δ 8.13 (d, *J* = 8.0 Hz, 0.5H), 7.90 (d, *J* = 8.7 Hz, 0.5H), 7.81 – 7.58 (m, 1.5H), 7.54 – 7.48 (m, 0.5H), 7.46 – 7.35 (m, 3H), 7.25 – 7.21 (m, 0.5H), 7.16 (t, *J* = 7.7 Hz, 0.5H), 7.10 – 7.02 (m, 1H), 6.78 (t, *J* = 7.9 Hz, 0.5H), 6.72 – 6.51 (m, 2H), 6.17 (d, *J* = 7.6 Hz, 0.5H), 4.44 (d, *J* = 2.5 Hz, 0.5H), 4.41 (d, *J* = 1.0 Hz, 0.5H), 3.95 (d, *J* = 1.8 Hz, 0.5H), 3.63 (s, 0.5H), 2.52 – 2.22 (m, 2H), 1.64 (s, 5H), 1.56 (s, 4H), 1.53 – 1.36 (m, 2H), 0.78 (s, 1.5H), 0.70 (s, 1.5H), 0.60 (s, 1.5H), 0.52 (s, 1.5H).

**<sup>13</sup>C NMR (101 MHz, CDCl<sub>3</sub>)** δ 175.18, 173.14, 170.74, 170.00, 148.44, 148.25, 144.21, 143.56, 134.94, 133.61, 129.50, 129.25, 129.05, 128.94, 128.83, 128.72, 128.08, 127.57, 124.78, 123.18, 123.07, 122.87, 115.52, 115.01, 100.98, 100.72, 100.45, 100.28, 100.01, 85.72, 85.63, 68.12, 67.82, 62.55, 61.73, 52.38, 49.55, 35.70, 35.30, 34.65, 34.32, 31.53, 31.26, 28.14, 28.07, 27.22, 26.24, 22.67, 21.86.

**HRMS (ESI)** calcd for C<sub>33</sub>H<sub>32</sub>F<sub>2</sub>N<sub>2</sub>O<sub>4</sub> (M+H)<sup>+</sup>: 559.2403, found: 559.2407.

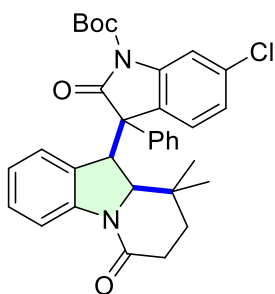

**<sup>1</sup>H NMR (400 MHz, CDCl<sub>3</sub>)** δ 7.99 (d, *J* = 8.1 Hz, 1H), 7.85 (d, *J* = 1.9 Hz, 1H), 7.39 (s, 1H), 7.33 – 7.20 (m, 4H), 7.15 – 7.04 (m, 1H), 6.85 (dd, *J* = 8.2, 1.9 Hz, 1H), 6.59 (t, *J* = 7.6 Hz, 1H), 5.84 (d, *J* = 7.6 Hz, 1H), 5.69 (d, *J* = 8.2 Hz, 1H), 4.40 (d, *J* = 2.5 Hz, 1H), 2.96 (d, *J* = 2.6 Hz, 1H), 2.29 – 2.06 (m, 2H), 1.49 (s, 9H), 1.45 – 1.29 (m, 2H), 1.02 (s, 3H), 0.55 (s, 3H).

**<sup>13</sup>C NMR (101 MHz, CDCl<sub>3</sub>)** δ 173.34, 168.95, 147.62, 143.70, 139.85, 135.56, 134.17, 128.37, 127.76, 127.67, 127.57, 127.43, 126.69, 126.64, 124.41, 124.14, 123.44, 122.72, 121.87, 114.44, 114.11, 84.26, 67.58, 58.86, 49.60, 34.20, 33.56, 29.89, 27.00, 25.53, 20.80.

**HRMS (ESI)** calcd for C<sub>33</sub>H<sub>33</sub>ClN<sub>2</sub>O<sub>4</sub> (M+H)<sup>+</sup>: 557.2202, found: 557.2205.

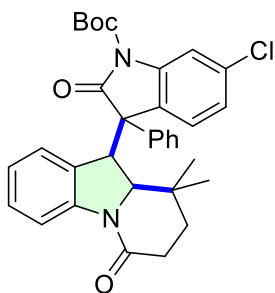

**<sup>1</sup>H NMR (400 MHz, CDCl<sub>3</sub>)** δ 7.81 – 7.75 (m, *J* = 8.3, 5.2 Hz, 1H), 7.62 – 7.54 (m, 3H), 7.31 – 7.20 (m, 3H), 7.12 (d, *J* = 8.2 Hz, 1H), 7.01 – 6.91 (m, 3H), 6.70 (t, *J* = 7.5 Hz, 1H), 4.24 (d, *J* = 2.0 Hz, 1H), 3.73 (d, *J* = 2.3 Hz, 1H), 2.54 – 2.25 (m, 2H), 1.53 (s, 9H), 1.45 – 1.27 (m, 2H), 0.43 (s, 3H), 0.40 (s, 3H).

**<sup>13</sup>C NMR (101 MHz, CDCl<sub>3</sub>)** δ 175.92, 170.13, 148.43, 143.50, 140.34, 134.85, 134.68, 134.34, 129.19, 128.92, 128.68, 128.55, 128.16, 126.07, 124.07, 123.89, 123.62, 123.33, 123.13, 115.63, 115.28, 85.16, 68.03, 60.92, 51.57, 35.35, 34.14, 31.43, 28.05, 26.58, 21.94.

**HRMS (ESI)** calcd for C<sub>33</sub>H<sub>33</sub>ClN<sub>2</sub>O<sub>4</sub> (M+H)<sup>+</sup>: 557.2202, found: 557.2205.

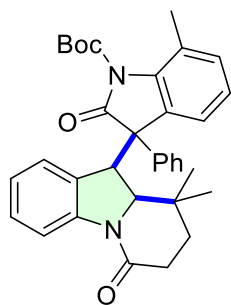

**<sup>1</sup>H NMR (400 MHz, CDCl<sub>3</sub>)** δ 8.05 (d, *J* = 8.0 Hz, 0.5H), 7.88 (d, *J* = 8.3 Hz, 0.5H), 7.77 – 7.70 (m, 1H), 7.60 – 7.49 (m, 1H), 7.40 – 7.28 (m, 3H), 7.20 (t, *J* = 7.8 Hz, 0.5H), 7.15 (dd, *J* = 6.5, 2.2 Hz, 0.5H), 7.09 (m, 1H), 7.05 – 6.98 (m, 0.5H), 6.98 – 6.91 (m, 1H), 6.85 (t, *J* = 7.7 Hz, 0.5H), 6.79 (t, *J* = 8.0 Hz, 0.5H), 6.68 (t, *J* = 8.0 Hz, 0.5H), 6.01 (d, *J* = 7.6 Hz, 0.5H), 5.71 (d, *J* = 7.5 Hz, 0.5H), 4.47 (d, *J* = 2.4 Hz, 0.5H), 4.32 (d, *J* = 2.2 Hz, 0.5H), 3.87 (d, *J* = 2.4 Hz, 0.5H), 3.18 (d, *J* = 2.6 Hz, 0.5H), 2.60 – 2.34 (m, 1H), 2.23 (s, 1.5H), 2.21 – 2.10 (m, 1H), 2.04 (s, 1.5H), 1.64 (s, 4.5H), 1.62 (s, 4.5H), 1.57 – 1.36 (m, 2H), 1.13 (s, 1.5H), 0.64 (s, 1.5H), 0.54 (s, 1.5H), 0.47 (s, 1.5H).

**<sup>13</sup>C NMR (101 MHz, CDCl<sub>3</sub>)** δ 177.01, 175.94, 170.01, 169.93, 149.48, 149.05, 144.78, 143.54, 138.60, 138.00, 136.68, 135.49, 132.02, 131.59, 129.15, 128.98, 128.80, 128.69, 128.51, 128.41, 128.26, 128.19, 128.11, 126.87, 126.22, 125.15, 124.61, 123.95, 123.76, 123.42, 123.17, 123.08, 122.89, 122.67, 114.96, 85.31, 85.03, 68.04, 67.94, 60.99, 60.27, 51.52, 50.95, 35.34, 35.28, 34.77, 34.24, 31.48, 31.13, 29.71, 27.76, 27.73, 26.55, 26.38, 22.24, 21.98, 19.24, 19.16.

**HRMS (ESI)** calcd for C<sub>34</sub>H<sub>36</sub>N<sub>2</sub>O<sub>4</sub> (M+Na)<sup>+</sup>: 559.2567, found: 559.2571.

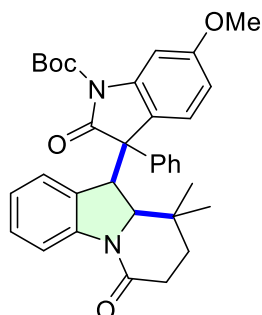

**<sup>1</sup>H NMR (400 MHz, CDCl<sub>3</sub>)** δ 8.09 (d, *J* = 8.0 Hz, 0.5H), 7.88 (d, *J* = 8.0 Hz, 0.5H), 7.79 – 7.69 (m, 1H), 7.53 (s, 1H), 7.47 (d, *J* = 2.4 Hz, 0.5H), 7.40 – 7.27 (m, 3H), 7.23 – 7.15 (m, 1.5H), 7.11 (d, *J* = 7.5 Hz, 0.5H), 7.01 (t, *J* = 7.7 Hz, 0.5H), 6.79 (t, *J* = 8.0 Hz, 0.5H), 6.67 (t, *J* = 7.6 Hz, 0.5H), 6.59 (dd, *J* = 8.5, 2.5 Hz, 0.5H), 6.47 (dd, *J* = 8.5, 2.5 Hz, 0.5H), 5.93 (d, *J* = 7.6 Hz, 0.5H), 5.77 (d, *J* = 8.5 Hz, 0.5H), 4.48 (d, *J* = 2.6 Hz, 0.5H), 4.31 (d, *J* = 2.1 Hz, 0.5H), 3.85 (d, *J* = 2.3 Hz, 0.5H), 3.80 (s, 1.5H), 3.71 (s, 1.5H), 3.09 (d, *J* = 2.7 Hz, 0.5H), 2.62 – 2.34 (m, 1H), 2.35 – 2.09 (m, 1H), 1.62 (s, 4.5H), 1.61 (s, 4.5H), 1.59 – 1.37 (m, 2H), 1.13 (s, 1.5H), 0.65 (s, 1.5H), 0.53 (s, 1.5H), 0.47 (s, 1.5H).

**<sup>13</sup>C NMR (101 MHz, CDCl<sub>3</sub>)** δ 176.88, 175.38, 170.17, 170.08, 160.39, 160.00, 148.95, 148.74, 144.81, 143.65, 141.08, 140.55, 137.58, 135.91, 129.22, 129.17, 128.94, 128.89, 128.75, 128.62, 128.59, 128.37, 128.33, 128.26, 127.58, 126.00, 125.30, 123.39, 123.27, 122.84, 117.31, 116.97, 115.22, 115.12, 109.59, 109.34, 101.69, 101.65, 84.81, 84.66, 68.71, 68.15, 60.70, 59.79, 55.51, 55.42, 51.71, 50.79, 35.41, 35.28, 34.73, 34.25, 31.59, 31.12, 28.18, 26.70, 26.64, 22.12, 22.09.

**HRMS (ESI)** calcd for C<sub>34</sub>H<sub>36</sub>N<sub>2</sub>O<sub>5</sub> (M+Na)<sup>+</sup>: 559.2567, found: 559.2566.

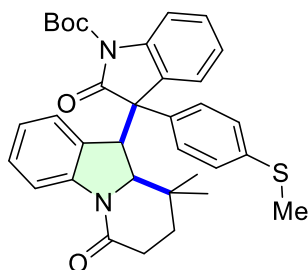

**<sup>1</sup>H NMR (400 MHz, CDCl<sub>3</sub>)** δ 8.08 (d, *J* = 8.0 Hz, 0.5H), 7.85 (d, *J* = 2.9 Hz, 0.5H), 7.83 (d, *J* = 2.8 Hz, 0.5H), 7.69 – 7.60 (m, 1H), 7.57 (d, *J* = 7.9 Hz, 0.5H), 7.44 (s, 1H), 7.36 – 7.27 (m, 1H), 7.25 – 7.18 (m, 2.5H), 7.18 – 7.11 (m, 0.5H), 7.11 – 7.02 (m, 1H), 7.01 – 6.90 (m, 1H), 6.83 – 6.66 (m, 1H), 6.09 (d, *J* = 7.6 Hz, 0.5H), 5.87 (d, *J* = 7.5 Hz, 0.5H), 4.46 (d, *J* = 2.5 Hz, 0.5H), 4.32 (d, *J* = 1.9 Hz, 0.5H), 3.88 (d, *J* = 2.2 Hz, 0.5H), 3.05 (d, *J* = 2.6 Hz, 0.5H), 2.62 – 2.37 (m, 4H), 2.34 – 2.01 (m, 1H), 1.63 (s, 4.5H), 1.61 (s, 4.5H), 1.57 – 1.37 (m, 2H), 1.12 (s, 1.5H), 0.65 (s, 1.5H), 0.58 (s, 1.5H), 0.54 (s, 1.5H).

**<sup>13</sup>C NMR (101 MHz, CDCl<sub>3</sub>)** δ 175.28, 173.74, 169.02, 168.87, 147.84, 147.62, 143.67, 142.46, 138.87, 138.31, 138.18, 137.95, 132.47, 130.77, 128.46, 128.29, 128.22, 128.10, 127.87, 127.83, 127.34, 127.02, 125.65, 125.02, 124.98, 124.45, 124.24, 124.13, 123.35, 122.78, 122.15, 122.11, 121.84, 114.04, 113.82, 113.61, 83.73, 83.59, 67.46, 67.04, 59.59, 58.68, 50.41, 49.36, 34.38, 34.17, 33.54, 33.07, 30.43, 29.92, 27.04, 25.82, 25.53, 20.98, 14.40, 14.38.

**HRMS (ESI)** calcd for C<sub>34</sub>H<sub>36</sub>N<sub>2</sub>O<sub>4</sub>S (M+Na)<sup>+</sup>: 591.2288, found: 591.2291.

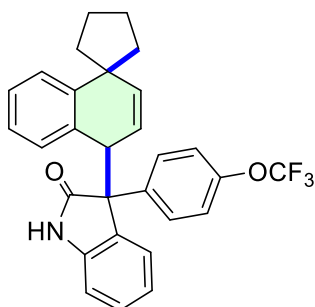

**<sup>1</sup>H NMR (400 MHz, DMSO-*d*<sub>6</sub>)** δ 10.59 (s, 1H), 7.65 (m, 1H), 7.59 (m, 1H), 7.42 – 7.28 (m, 4H), 7.27 – 7.14 (m, 1H), 7.13 – 6.81 (m, 3H), 6.74 (m, 1H), 6.64 (m, 0.5H), 6.15 (m, 0.5H), 5.86 (m, 0.5H), 5.68 (s, 1H), 5.52 (m, 0.5H), 4.67 (m, 0.5H), 4.56 (m, 0.5H), 1.97 – 1.38 (m, 8H).

**<sup>13</sup>C NMR (101 MHz, DMSO-*d*<sub>6</sub>)** δ 179.24, 177.98, 148.10, 147.94, 147.92, 146.14, 145.38, 143.14, 142.28, 138.80, 138.60, 138.20, 137.89, 132.99, 132.54, 130.65, 129.94, 128.84, 128.69, 127.93, 127.78, 127.65, 127.42, 127.28, 127.19, 127.04, 125.13, 124.68, 121.83, 121.29, 121.23, 121.07, 119.24, 119.18, 110.04, 109.83, 61.88, 61.30, 47.34, 46.73, 45.88, 45.71, 45.43, 45.12, 44.35, 44.04, 26.87, 26.28, 26.09, 26.03.

**<sup>19</sup>F NMR (376 MHz, DMSO-*d*<sub>6</sub>)** δ -56.81, -56.83.

**HRMS (ESI)** calcd for C<sub>29</sub>H<sub>24</sub>F<sub>3</sub>NO<sub>2</sub> (M+H)<sup>+</sup>: 476.1832, found: 476.1834.

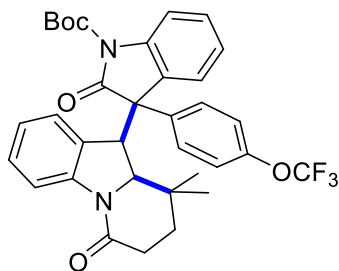

**<sup>1</sup>H NMR (400 MHz, CDCl<sub>3</sub>)** δ 8.02 (d, *J* = 8.0 Hz, 0.5H), 7.86 – 7.68 (m, 2H), 7.61 – 7.44 (m, 1.5H), 7.37 – 7.21 (m, 1H), 7.18 – 6.84 (m, 5H), 6.71 (t, *J* = 7.1 Hz, 0.5H), 6.65 (t, *J* = 7.9 Hz, 0.5H), 5.90 (d, *J* = 7.6 Hz, 0.5H), 5.83 (d, *J* = 7.4 Hz, 0.5H), 4.38 (d, *J* = 2.4 Hz, 0.5H), 4.25 (d, *J* = 1.8 Hz, 0.5H), 3.78 (d, *J* = 2.1 Hz, 0.5H), 2.98 (d, *J* = 2.5 Hz, 0.5H), 2.59 – 2.28 (m, 1H), 2.26 – 1.95 (m, 1H), 1.57 (s, 4.5H), 1.55 (s, 4.5H), 1.51 – 1.31 (m, 2H), 1.05 (s, 1.8H), 0.58 (s, 1.7H), 0.53 – 0.40 (m, 2.4H).

**<sup>13</sup>C NMR (101 MHz, CDCl<sub>3</sub>)** δ 175.02, 173.53, 168.95, 168.83, 148.06, 147.71, 147.50, 143.72, 142.46, 138.88, 138.37, 134.57, 132.97, 129.68, 129.31, 128.55, 128.40, 128.15, 128.01, 126.92, 126.65, 125.64, 124.09, 124.02, 123.93, 123.83, 123.51, 122.96, 122.15, 121.84, 119.72, 114.14, 114.08, 113.97, 113.77, 83.98, 83.82, 67.46, 67.06, 59.39, 58.54, 50.86, 49.78, 34.29, 34.14, 33.52, 33.07, 30.41, 29.90, 27.03, 25.59, 25.48, 20.95.

**HRMS (ESI)** calcd for C<sub>34</sub>H<sub>33</sub>F<sub>3</sub>N<sub>2</sub>O<sub>5</sub> (M+Na)<sup>+</sup>: 629.2234, found: 629.2237.

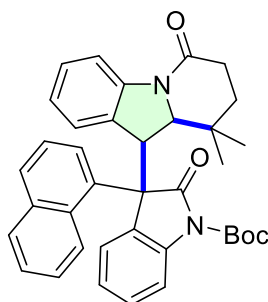

**<sup>1</sup>H NMR (400 MHz, CDCl<sub>3</sub>)** δ 8.06 – 7.21 (m, 8.5H), 7.15 – 6.60 (m, 5H), 6.43 (t, *J* = 6.7 Hz, 0.5H), 5.73 (s, 0.5H), 5.40 (s, 1H), 4.81 (s, 0.5H), 3.75 (s, 0.5H), 3.17 (s, 0.5H), 2.44 – 1.97 (m, 2H), 1.51 (s, 9H), 1.44 – 1.25 (m, 2H), 1.20 (s, 1.6H), 0.60 (s, 1.8H), 0.52 – 0.07 (m, 2.6H).

**<sup>13</sup>C NMR (101 MHz, CDCl<sub>3</sub>)** δ 173.26, 169.01, 168.78, 147.93, 143.84, 142.86, 138.60, 138.05, 134.30, 131.96, 130.92, 129.34, 129.21, 128.68, 128.39, 128.28, 128.06, 128.00, 127.01, 125.26, 125.05, 124.58, 124.11, 123.58, 123.36, 123.23, 121.90, 121.75, 113.84, 113.71, 113.55, 113.32, 83.75, 83.52, 66.75, 48.17, 35.02, 34.52, 33.50, 30.59, 29.98, 27.02, 26.99, 26.11, 21.74, 21.34, -0.01.

**HRMS (ESI)** calcd for C<sub>37</sub>H<sub>36</sub>N<sub>2</sub>O<sub>4</sub> (M+Na)<sup>+</sup>: 595.2567, found: 595.2572.

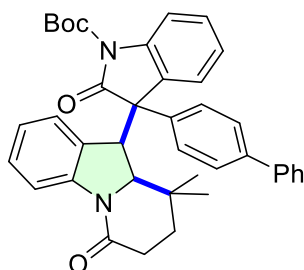

**<sup>1</sup>H NMR (400 MHz, CDCl<sub>3</sub>)** δ 8.11 (d, *J* = 8.0 Hz, 0.5H), 7.92 – 7.85 (m, 1H), 7.84 – 7.78 (m, 1H), 7.69 – 7.55 (m, 5.5H), 7.51 – 7.41 (m, 2H), 7.41 – 7.30 (m, 2H), 7.24 – 7.05 (m, 2H), 7.05 – 6.94 (m, 1H), 6.79 (t, *J* = 7.0 Hz, 0.5H), 6.71 (t, *J* = 7.1 Hz, 0.5H), 6.11 (d, *J* = 7.6 Hz, 0.5H), 5.95 (d, *J* = 7.5 Hz, 0.5H), 4.55 (d, *J* = 2.6 Hz, 0.5H), 4.40 (d, *J* = 2.0 Hz, 0.5H), 3.95 (d, *J* = 2.3 Hz, 0.5H), 3.10 (d, *J* = 2.6 Hz, 0.5H), 2.64 – 2.38 (m, 1H), 2.33 – 2.09 (m, 1H), 1.64 (s, 4.5H), 1.63 (s, 4.5H), 1.58 – 1.37 (m, 2H), 1.16 (s, 1.5H), 0.68 (s, 1.5H), 0.58 (s, 1.5H), 0.56 (s, 1.5H).

**<sup>13</sup>C NMR (101 MHz, CDCl<sub>3</sub>)** δ 176.36, 174.83, 170.09, 169.94, 148.93, 148.71, 144.77, 143.56, 141.07, 140.90, 140.15, 139.98, 139.43, 136.00, 134.29, 129.56, 129.37, 129.29, 129.23, 128.92, 128.42, 128.12, 127.71, 127.12, 127.08, 127.05, 126.81, 125.59, 125.30, 124.44, 123.86, 123.26, 123.18, 122.89, 115.11, 114.89, 114.69, 84.81, 84.66, 68.54, 68.14, 60.87, 59.97, 51.67, 50.60, 35.43, 35.25, 34.64, 34.16, 31.52, 31.01, 28.12, 26.79, 26.61, 22.09.

**HRMS (ESI)** calcd for C<sub>39</sub>H<sub>38</sub>N<sub>2</sub>O<sub>4</sub> (M+Na)<sup>+</sup>: 621.2724, found: 621.2725.

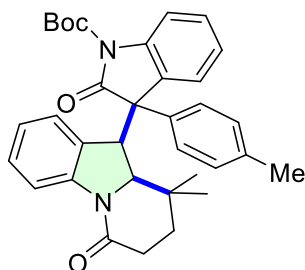

**<sup>1</sup>H NMR (400 MHz, CDCl<sub>3</sub>)** δ 8.08 (d, *J* = 8.0 Hz, 0.5H), 7.89 – 7.81 (m, 1H), 7.64 – 7.58 (m, 1H), 7.57 (d, *J* = 8.1 Hz, 0.5H), 7.41 (s, 1H), 7.35 – 7.27 (m, 1H), 7.21 (t, *J* = 7.4 Hz, 0.5H), 7.19 – 7.13 (m, 2H), 7.13 – 6.90 (m, 2.5H), 6.76 (t, *J* = 7.5 Hz, 0.5H), 6.71 (t, *J* = 7.1 Hz, 0.5H), 6.04 (d, *J* = 7.6 Hz, 0.5H), 5.89 (d, *J* = 7.6 Hz, 0.5H), 4.48 (d, *J* = 2.6 Hz, 0.5H), 4.33 (d, *J* = 2.0 Hz, 0.5H), 3.90 (d, *J* = 2.3 Hz, 0.5H), 3.07 (d, *J* = 2.6 Hz, 0.5H), 2.61 – 2.40 (m, 1H), 2.37 (s, 1.5H), 2.33 (s, 1.5H), 2.29 – 2.06 (m, 1H), 1.62 (s, 4.5H), 1.60 (s, 4.5H), 1.55 – 1.38 (m, 2H), 1.12 (s, 1.5H), 0.65 (s, 1.5H), 0.60 – 0.44 (m, 3H).

**<sup>13</sup>C NMR (101 MHz, CDCl<sub>3</sub>)** δ 176.60, 175.05, 170.17, 170.02, 149.05, 148.83, 144.81, 143.60, 140.02, 139.45, 138.27, 138.16, 134.05, 132.33, 129.37, 129.29, 129.25, 129.07, 128.88, 128.71, 128.35, 126.85, 125.90, 125.67, 125.42, 125.34, 124.39, 123.82, 123.33, 123.23, 122.88, 115.16, 115.11, 114.87, 114.66, 84.73, 84.59, 68.60, 68.13, 60.86, 59.92, 51.54, 50.54, 35.49, 35.31, 34.71, 34.25, 31.59, 31.08, 28.18, 26.83, 26.68, 22.14, 21.21, 21.11.

**HRMS (ESI)** calcd for C<sub>34</sub>H<sub>36</sub>N<sub>2</sub>O<sub>4</sub> (M+Na)<sup>+</sup>: 559.2567, found: 559.2570.

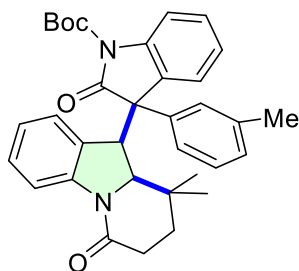

**<sup>1</sup>H NMR (400 MHz, CDCl<sub>3</sub>)** δ 8.09 (d, *J* = 8.0 Hz, 0.5H), 7.86 (d, *J* = 3.0 Hz, 0.5H), 7.84 (d, *J* = 3.0 Hz, 0.5H), 7.63 (s, 0.5H), 7.57 (d, *J* = 7.7 Hz, 0.5H), 7.39 (d, *J* = 7.8 Hz, 0.5H), 7.37 – 7.27 (m, 2H), 7.24 – 6.90 (m, 5H), 6.77 (t, *J* = 8.0 Hz, 0.5H), 6.70 (t, *J* = 8.0 Hz, 0.5H), 6.01 (d, *J* = 7.6 Hz, 0.5H), 5.90 (d, *J* = 7.5 Hz, 0.5H), 4.50 (d, *J* = 2.6 Hz, 0.5H), 4.36 (d, *J* = 2.0 Hz, 0.5H), 3.88 (d, *J* = 2.3 Hz, 0.5H), 3.06 (d, *J* = 2.6 Hz, 0.5H), 2.60 – 2.39 (m, 1H), 2.39 – 2.32 (m, 3H), 2.30 – 2.06 (m, 1H), 1.63 (s, 4.5H), 1.61 (s, 4.5H), 1.57 – 1.37 (m, 2H), 1.13 (s, 1.5H), 0.66 (s, 1.5H), 0.61 – 0.50 (m, 3H).

**<sup>13</sup>C NMR (101 MHz, CDCl<sub>3</sub>)** δ 176.42, 174.83, 170.08, 169.93, 148.96, 148.73, 144.74, 143.53, 139.93, 139.38, 138.23, 136.88, 135.19, 129.90, 129.31, 129.21, 129.03, 128.83, 128.53, 128.37, 128.27, 128.21, 126.83, 126.12, 125.94, 125.71, 125.56, 125.33, 124.32, 123.75, 123.22, 123.13, 122.78, 115.07, 115.03, 114.78, 114.58, 84.69, 84.56, 68.53, 68.08, 60.97, 60.03, 51.65, 50.55, 35.46, 35.24, 34.63, 34.20, 31.51, 30.99, 28.11, 26.62, 22.10, 22.07, 21.74, 21.68.

**HRMS (ESI)** calcd for C<sub>34</sub>H<sub>36</sub>N<sub>2</sub>O<sub>4</sub> (M+Na)<sup>+</sup>: 559.2567, found: 559.2571.

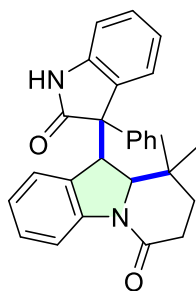

**$^1\text{H}$  NMR (400 MHz,  $\text{CDCl}_3$ )**  $\delta$  8.70 (s, 1H), 7.90 (d,  $J$  = 8.0 Hz, 1H), 7.85 (d,  $J$  = 7.4 Hz, 2H), 7.47 – 7.30 (m, 5H), 7.24 (d,  $J$  = 7.5 Hz, 1H), 7.08 (t,  $J$  = 7.1 Hz, 1H), 7.05 – 6.91 (m, 2H), 6.82 – 6.66 (m, 2H), 4.28 (d,  $J$  = 2.5 Hz, 1H), 3.98 (d,  $J$  = 2.5 Hz, 1H), 2.68 – 2.39 (m, 2H), 1.67 – 1.37 (m, 2H), 0.57 (s, 3H), 0.46 (s, 3H).

**$^{13}\text{C}$  NMR (101 MHz,  $\text{CDCl}_3$ )**  $\delta$  179.53, 170.18, 143.52, 140.46, 135.75, 128.94, 128.72, 128.60, 128.47, 128.12, 127.29, 125.89, 123.61, 123.17, 122.00, 114.95, 110.07, 68.15, 61.19, 50.75, 35.24, 34.22, 31.48, 26.34, 21.91.

**HRMS (ESI)** calcd for  $\text{C}_{28}\text{H}_{26}\text{N}_2\text{O}_2$  ( $\text{M}+\text{H}$ ) $^+$ : 423.2067, found: 423.2065.

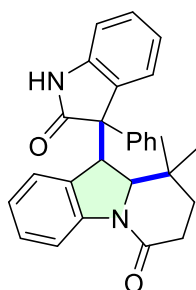

**$^1\text{H}$  NMR (400 MHz,  $\text{CDCl}_3$ )**  $\delta$  9.17 (d,  $J$  = 61.2 Hz, 1H), 8.12 (d,  $J$  = 8.0 Hz, 1H), 7.62 (s, 2H), 7.40 (m, 3H), 7.24 (dd,  $J$  = 17.5, 8.2 Hz, 2H), 6.96 (d,  $J$  = 7.8 Hz, 1H), 6.87 (t,  $J$  = 7.6 Hz, 1H), 6.71 (t,  $J$  = 7.5 Hz, 1H), 5.98 (d,  $J$  = 7.5 Hz, 2H), 4.44 (d,  $J$  = 1.5 Hz, 1H), 3.16 (s, 1H), 2.39 – 2.09 (m, 2H), 1.75 – 1.37 (m, 2H), 1.13 (s, 3H), 0.66 (s, 3H).

**$^{13}\text{C}$  NMR (101 MHz,  $\text{CDCl}_3$ )**  $\delta$  178.79, 169.99, 144.55, 141.06, 137.16, 129.06, 129.01, 128.69, 128.60, 128.49, 128.03, 127.25, 125.23, 122.74, 122.56, 114.98, 110.08, 68.33, 60.49, 49.88, 35.24, 34.53, 31.06, 26.45, 22.19.

**HRMS (ESI)** calcd for  $\text{C}_{28}\text{H}_{26}\text{N}_2\text{O}_2$  ( $\text{M}+\text{H}$ ) $^+$ : 423.2067, found: 423.2068.

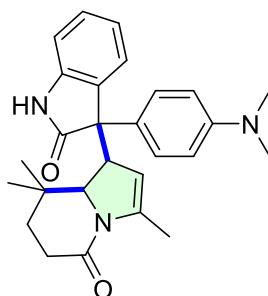

**$^1\text{H}$  NMR (400 MHz,  $\text{CDCl}_3$ )**  $\delta$  9.14 (s, 0.5H), 8.89 (s, 0.5H), 7.50 – 7.41 (m, 1H), 7.27 – 7.09 (m, 3H), 7.02 – 6.91 (m, 1H), 6.88 (d,  $J$  = 7.5 Hz, 0.5H), 6.81 (d,  $J$  = 7.6 Hz, 0.5H), 6.65 – 6.55 (m, 2H), 4.53 (d,  $J$  = 0.6 Hz, 0.5H), 4.43 (d,  $J$  = 0.9 Hz, 0.5H), 3.82 (d,  $J$  = 1.4 Hz, 0.5H), 3.68 (d,  $J$  = 3.0 Hz, 0.5H), 3.49 (d,  $J$  = 1.5 Hz, 0.5H), 2.85 (s, 3H), 2.83 (s, 3H), 2.75 (d,  $J$  = 3.6 Hz, 0.5H), 2.41 – 2.16 (m, 1.5H), 2.12 (s, 1.5H), 2.08 – 1.95 (m, 0.5H), 1.83 (s, 1.5H), 1.44 – 1.25 (m, 2H), 0.87 (s, 1.5H), 0.74 (s, 1.5H), 0.65 (s, 1.5H), 0.31 (s, 1.5H).

**$^{13}\text{C}$  NMR (101 MHz,  $\text{CDCl}_3$ )**  $\delta$  180.53, 179.87, 169.42, 169.17, 149.99, 149.72, 144.01, 143.92, 141.57, 140.95, 129.58, 129.38, 129.22, 128.53, 128.40, 128.13, 126.63, 125.70, 125.63, 123.26, 122.62, 121.85, 112.39, 112.22,



110.20, 109.96, 107.65, 107.31, 67.80, 67.40, 59.76, 59.07, 51.52, 49.71, 40.48, 40.44, 34.90, 34.77, 34.37, 34.26, 31.69, 31.09, 26.09, 25.67, 21.90, 15.72, 15.42.

**HRMS (ESI)** calcd for  $C_{27}H_{31}N_3O_2$  ( $M+Na$ )<sup>+</sup>: 452.2308, found: 452.2309.

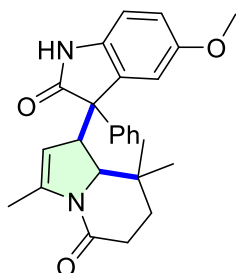

**$^1H$  NMR (400 MHz,  $CDCl_3$ )**  $\delta$  9.27 (s, 0.6H), 9.04 (s, 0.4H), 7.84 – 7.74 (m, 0.8H), 7.52 – 7.43 (m, 1.2H), 7.42 – 7.32 (m, 3H), 7.02 – 6.81 (m, 3H), 4.62 – 4.55 (m, 1H), 4.00 (d,  $J$  = 3.0 Hz, 0.6H), 3.85 – 3.79 (m, 3H), 3.72 (d,  $J$  = 3.0 Hz, 0.4H), 3.66 (d,  $J$  = 1.6 Hz, 0.4H), 2.90 (d,  $J$  = 3.6 Hz, 0.6H), 2.48 – 2.31 (m, 1H), 2.26 (s, 1.6H), 2.23 – 2.11 (m, 0.6H), 2.06 – 2.01 (m, 0.4H), 2.00 (s, 1.4H), 1.54 – 1.40 (m, 2H), 1.00 (s, 1.8H), 0.87 (s, 1.8H), 0.77 (s, 1.2H), 0.34 (s, 1.2H).

**$^{13}C$  NMR (101 MHz,  $CDCl_3$ )**  $\delta$  179.79, 179.17, 169.28, 169.23, 155.69, 155.23, 144.40, 144.34, 138.25, 136.06, 134.91, 134.40, 130.26, 130.15, 128.63, 128.44, 128.38, 127.76, 127.56, 114.27, 113.36, 113.26, 113.06, 110.55, 110.50, 106.94, 106.87, 67.80, 67.33, 60.83, 60.20, 56.06, 55.83, 51.79, 49.87, 34.74, 34.28, 31.62, 31.12, 25.76, 25.58, 21.89, 21.84, 15.80, 15.47.

**HRMS (ESI)** calcd for  $C_{26}H_{28}N_2O_3$  ( $M+Na$ )<sup>+</sup>: 439.1992, found: 439.1994.

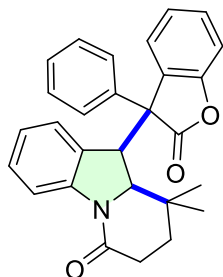

**$^1H$  NMR (400 MHz,  $CDCl_3$ )**  $\delta$  8.09 (d,  $J$  = 8.1 Hz, 0.5H), 7.88 (d,  $J$  = 8.1 Hz, 0.5H), 7.83 – 7.72 (m, 1H), 7.68 – 7.48 (m, 1H), 7.47 – 7.29 (m, 4H), 7.25 – 7.10 (m, 2H), 7.10 – 6.93 (m, 1.5H), 6.92 – 6.78 (m, 1H), 6.72 (t,  $J$  = 7.1 Hz, 0.5H), 6.00 – 5.85 (m, 1H), 4.43 (d,  $J$  = 2.2 Hz, 0.5H), 4.26 (d,  $J$  = 2.2 Hz, 0.5H), 3.91 (d,  $J$  = 2.4 Hz, 0.5H), 3.17 (d,  $J$  = 2.4 Hz, 0.5H), 2.65 – 2.36 (m, 1H), 2.34 – 2.07 (m, 1H), 1.79 – 1.59 (m, 1H), 1.58 – 1.40 (m, 1H), 1.17 (s, 1.5H), 0.63 (s, 1.5H), 0.55 (s, 1.5H), 0.39 (s, 1.5H).

**$^{13}C$  NMR (101 MHz,  $CDCl_3$ )**  $\delta$  177.60, 176.43, 170.05, 153.27, 152.69, 144.76, 143.59, 136.08, 134.67, 130.09, 129.73, 129.63, 129.23, 128.95, 128.79, 128.72, 128.47, 128.08, 127.46, 127.35, 125.79, 125.31, 125.16, 124.94, 124.46, 123.97, 123.75, 123.47, 122.93, 115.31, 115.23, 111.02, 110.90, 68.99, 68.02, 60.59, 59.47, 51.94, 51.10, 35.49, 35.23, 34.39, 34.24, 31.51, 31.11, 26.42, 26.25, 22.20, 21.90.

**HRMS (ESI)** calcd for  $C_{28}H_{25}NO_3$  ( $M+H$ )<sup>+</sup>: 424.1907, found: 424.1907.

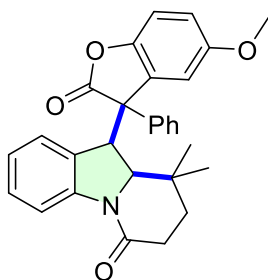

**$^1\text{H}$  NMR (400 MHz,  $\text{CDCl}_3$ )**  $\delta$  8.05 (d,  $J = 8.0$  Hz, 0.5H), 7.84 (d,  $J = 8.0$  Hz, 0.5H), 7.72 (m, 1H), 7.48 (m, 1H), 7.42 – 7.24 (m, 4H), 7.18 – 7.09 (m, 1H), 7.00 – 6.96 (m, 1H), 6.83 – 6.75 (m, 1.5H), 6.73 – 6.57 (m, 1.5H), 5.88 (d,  $J = 7.6$  Hz, 0.5H), 5.33 (d,  $J = 2.5$  Hz, 0.5H), 4.39 (d,  $J = 2.3$  Hz, 0.5H), 4.19 (d,  $J = 2.1$  Hz, 0.5H), 3.80 (d,  $J = 2.3$  Hz, 0.5H), 3.65 (s, 1.5H), 3.42 (s, 1.5H), 3.10 (d,  $J = 2.5$  Hz, 0.5H), 2.52 – 2.33 (m, 1H), 2.28 – 2.13 (m, 1H), 1.71 – 1.56 (m, 1H), 1.52 – 1.34 (m, 1H), 1.12 (s, 1.5H), 0.58 (s, 1.5H), 0.48 (s, 1.5H), 0.34 (s, 1.5H).

**$^{13}\text{C}$  NMR (101 MHz,  $\text{CDCl}_3$ )**  $\delta$  177.82, 176.69, 170.02, 169.88, 156.19, 155.98, 146.96, 146.51, 144.78, 143.47, 136.10, 134.56, 129.48, 129.18, 128.86, 128.70, 128.63, 128.59, 128.32, 128.04, 127.43, 125.84, 125.45, 125.23, 123.67, 123.44, 122.92, 116.52, 115.19, 115.05, 111.86, 111.32, 111.24, 68.90, 67.91, 61.16, 59.96, 56.08, 55.74, 51.68, 50.81, 35.43, 35.14, 34.29, 34.12, 31.42, 31.04, 26.35, 26.20, 22.06, 21.89.

**HRMS (ESI)** calcd for  $\text{C}_{29}\text{H}_{27}\text{NO}_4$  ( $\text{M}+\text{H}$ ) $^+$ : 454.2013, found: 454.2012.

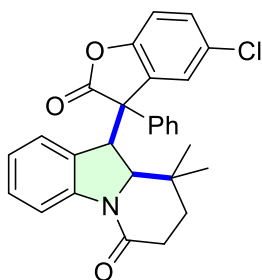

**$^1\text{H}$  NMR (400 MHz,  $\text{CDCl}_3$ )**  $\delta$  8.06 (d,  $J = 8.1$  Hz, 0.5H), 7.88 (d,  $J = 8.1$  Hz, 0.5H), 7.68 (m, 1H), 7.54 – 7.28 (m, 4H), 7.24 (m, 1.5H), 7.14 – 7.05 (m, 1H), 7.05 – 6.94 (m, 1H), 6.85 – 6.71 (m, 1H), 6.68 (t,  $J = 7.5$  Hz, 0.5H), 5.86 (d,  $J = 7.6$  Hz, 0.5H), 5.72 (s, 0.5H), 4.37 (d,  $J = 1.9$  Hz, 0.5H), 4.18 (d,  $J = 1.9$  Hz, 0.5H), 3.76 (d,  $J = 2.3$  Hz, 0.5H), 3.12 (d,  $J = 2.1$  Hz, 0.5H), 2.60 – 2.34 (m, 1H), 2.34 – 2.07 (m, 1H), 1.74 – 1.54 (m, 1H), 1.53 – 1.33 (m, 1H), 1.09 (s, 1.5H), 0.57 (s, 1.5H), 0.47 (s, 1.5H), 0.34 (s, 1.5H).

**$^{13}\text{C}$  NMR (101 MHz,  $\text{CDCl}_3$ )**  $\delta$  176.80, 175.63, 169.88, 151.55, 151.04, 144.70, 143.52, 135.32, 133.84, 130.12, 129.87, 129.72, 129.68, 129.44, 129.19, 129.03, 128.96, 128.89, 128.43, 128.15, 127.45, 126.79, 126.62, 125.89, 124.97, 123.67, 123.27, 123.00, 115.40, 115.35, 111.98, 111.86, 68.81, 67.89, 60.97, 59.88, 51.88, 51.11, 35.46, 35.15, 34.26, 34.11, 31.31, 31.02, 26.32, 26.17, 21.94, 21.71.

**HRMS (ESI)** calcd for  $\text{C}_{28}\text{H}_{24}\text{ClNO}_3$  ( $\text{M}+\text{H}$ ) $^+$ : 458.1517, found: 458.1518.

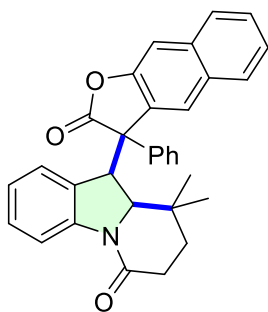

**<sup>1</sup>H NMR (400 MHz, CDCl<sub>3</sub>)** δ 7.92 (d, *J* = 8.8 Hz, 0.5H), 7.83 – 7.74 (m, 1H), 7.73 – 7.56 (m, 3.5H), 7.48 – 7.34 (m, 5H), 7.25 – 7.16 (m, 1H), 7.13 (d, *J* = 7.5 Hz, 0.5H), 7.06 (d, *J* = 8.8 Hz, 0.5H), 6.90 – 6.79 (m, 1.5H), 6.75 (t, *J* = 7.0 Hz, 0.5H), 6.66 (d, *J* = 7.6 Hz, 0.5H), 5.83 (d, *J* = 8.5 Hz, 0.5H), 4.73 (d, *J* = 2.0 Hz, 0.5H), 4.61 (s, 0.5H), 4.08 (d, *J* = 1.2 Hz, 0.5H), 3.16 (d, *J* = 1.8 Hz, 0.5H), 2.51 – 1.88 (m, 2H), 1.75 – 1.36 (m, 2H), 1.16 (s, 1.5H), 1.03 (s, 1.5H), 0.62 (s, 1.5H), 0.53 (s, 1.5H).

**<sup>13</sup>C NMR (101 MHz, CDCl<sub>3</sub>)** δ 178.19, 177.01, 169.75, 169.70, 151.68, 151.12, 144.68, 142.85, 135.06, 134.43, 132.23, 131.63, 131.32, 131.10, 130.50, 130.13, 129.76, 129.73, 129.63, 129.15, 129.10, 129.03, 128.83, 128.69, 128.65, 128.45, 127.68, 126.69, 125.62, 124.70, 124.67, 124.29, 123.44, 123.16, 123.03, 119.16, 118.47, 116.05, 114.40, 111.09, 110.89, 68.95, 68.44, 64.02, 63.07, 51.77, 50.01, 36.33, 35.36, 34.29, 34.20, 31.77, 31.09, 27.77, 26.11, 22.96, 22.27.

**HRMS (ESI)** calcd for C<sub>32</sub>H<sub>27</sub>NO<sub>3</sub> (M+H)<sup>+</sup>: 474.2064, found: 474.2063.

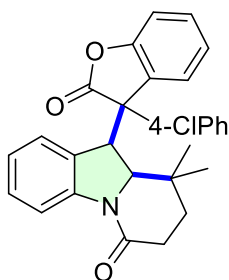

**<sup>1</sup>H NMR (400 MHz, CDCl<sub>3</sub>)** δ 8.02 (d, *J* = 8.1 Hz, 0.5H), 7.80 (d, *J* = 8.0 Hz, 0.5H), 7.71 – 7.61 (m, 1H), 7.50 – 7.37 (m, 1H), 7.37 – 7.29 (m, 2H), 7.29 – 7.21 (m, 1H), 7.15 – 7.06 (m, 1.5H), 7.04 – 6.88 (m, 1.5H), 6.85 – 6.73 (m, 1.5H), 6.70 (t, *J* = 7.5 Hz, 0.5H), 5.92 (d, *J* = 7.6 Hz, 0.5H), 5.83 (d, *J* = 7.5 Hz, 0.5H), 4.31 (d, *J* = 2.4 Hz, 0.5H), 4.15 (d, *J* = 2.3 Hz, 0.5H), 3.79 (d, *J* = 2.4 Hz, 0.5H), 3.06 (d, *J* = 2.5 Hz, 0.5H), 2.57 – 2.31 (m, 1H), 2.29 – 1.96 (m, 1H), 1.69 – 1.34 (m, 2H), 1.10 (s, 1.5H), 0.56 (s, 1.5H), 0.48 (s, 1.5H), 0.40 (s, 1.5H).

**<sup>13</sup>C NMR (101 MHz, CDCl<sub>3</sub>)** δ 177.20, 176.05, 169.93, 153.12, 152.56, 144.67, 143.45, 134.95, 134.82, 134.57, 133.21, 130.26, 130.07, 129.90, 129.78, 129.72, 129.28, 129.02, 128.98, 127.60, 127.09, 127.03, 125.48, 125.07, 124.64, 124.55, 124.38, 124.07, 123.69, 123.31, 122.94, 115.24, 111.07, 110.95, 68.88, 67.99, 60.04, 58.97, 51.80, 50.95, 35.38, 35.16, 34.25, 34.07, 31.37, 30.97, 26.41, 26.28, 22.09, 21.78.

**HRMS (ESI)** calcd for C<sub>22</sub>H<sub>20</sub>NO<sub>3</sub> (M+ Na)<sup>+</sup>: 369.1335, found: 369.1336.

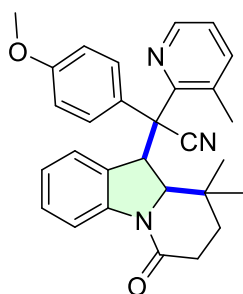

**<sup>1</sup>H NMR (400 MHz, CDCl<sub>3</sub>)** δ 8.67 (dd, *J* = 4.6, 1.2 Hz, 0.5H), 8.51 (s, 0.5H), 8.25 (d, *J* = 8.0 Hz, 0.5H), 7.96 (t, *J* = 11.4 Hz, 0.5H), 7.49 – 7.39 (m, 1H), 7.37 – 7.25 (m, 1.5H), 7.22 – 7.03 (m, 1.5H), 6.93 – 6.55 (m, 5H), 5.29 (d, *J* = 9.2 Hz, 0.5H), 5.00 (s, 0.5H), 4.14 (d, *J* = 2.1 Hz, 0.5H), 3.82 (d, *J* = 3.1 Hz, 0.5H), 3.77 (s, 1.5H), 3.72 (s, 1.5H), 2.66 – 2.30 (m, 2H), 2.13 (s, 1.5H), 1.95 (s, 1.5H), 1.83 – 1.61 (m, 1.5H), 1.57 – 1.36 (m, 2H), 0.67 – 0.54 (m, 3H), 0.23 (s, 1.5H).

**<sup>1</sup>H NMR (400 MHz, CDCl<sub>3</sub>)** δ 170.15, 169.87, 159.56, 159.25, 153.68, 145.18, 145.03, 144.72, 140.98, 140.88, 134.38, 129.76, 129.18, 128.93, 128.85, 128.06, 126.15, 123.71, 123.17, 122.38, 118.55, 115.59, 114.79, 113.92,

113.52, 69.29, 67.06, 58.57, 55.37, 55.25, 49.46, 36.41, 35.20, 34.71, 34.35, 31.53, 31.27, 26.10, 23.22, 21.84, 20.15, 20.07.

**HRMS (ESI)** calcd for  $C_{29}H_{29}N_3O_2$  ( $M+Na$ )<sup>+</sup>: 474.2152, found: 474.2153.

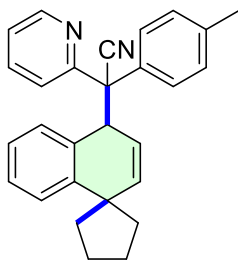

**<sup>1</sup>H NMR (400 MHz, DMSO-*d*<sub>6</sub>)** δ 8.76 (dd, *J* = 10.3, 4.1 Hz, 1H), 7.86 (t, *J* = 7.8 Hz, 1H), 7.78 (t, *J* = 6.9 Hz, 1H), 7.68 (d, *J* = 8.3 Hz, 1H), 7.62 (d, *J* = 7.9 Hz, 1H), 7.46 (d, *J* = 9.1 Hz, 0H), 7.38 (dd, *J* = 14.3, 7.6 Hz, 3H), 7.29 – 7.11 (m, 3H), 6.66 (dt, *J* = 21.0, 7.0 Hz, 1H), 6.10 – 5.85 (m, 2H), 5.50 (dd, *J* = 10.3, 4.3 Hz, 0H), 5.35 (dd, *J* = 10.3, 4.3 Hz, 1H), 5.25 (d, *J* = 4.4 Hz, 1H), 5.05 (d, *J* = 4.3 Hz, 0H), 2.28 (s, 3H), 2.17 – 1.62 (m, 8H).

**<sup>13</sup>C NMR (101 MHz, DMSO-*d*<sub>6</sub>)** δ 157.59, 157.55, 149.83, 149.67, 146.34, 146.28, 138.91, 138.67, 138.47, 138.28, 137.94, 137.71, 135.26, 135.03, 132.79, 131.79, 129.73, 129.55, 127.97, 127.91, 127.84, 127.46, 127.20, 124.79, 124.29, 123.77, 123.56, 122.78, 120.78, 120.66, 120.05, 119.84, 63.29, 62.93, 46.76, 46.48, 46.43, 46.26, 46.00, 45.42, 45.36, 45.21, 26.33, 26.30, 26.24, 20.98, 20.93.

**HRMS (ESI)** calcd for  $C_{28}H_{26}N_2$  ( $M+H$ )<sup>+</sup>: 391.2169, found: 391.2172.

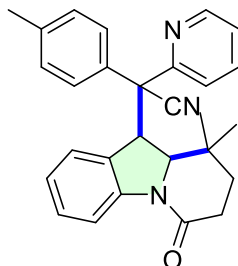

**<sup>1</sup>H NMR (400 MHz, CDCl<sub>3</sub>)** δ 8.82 (d, *J* = 5.6 Hz, 0.5H), 8.70 (d, *J* = 5.6 Hz, 0.5H), 8.23 (d, *J* = 8.1 Hz, 0.5H), 8.11 (d, *J* = 8.1 Hz, 0.5H), 7.80 – 7.70 (m, 1H), 7.68 – 7.58 (m, 1H), 7.55 (d, *J* = 8.0 Hz, 0.5H), 7.50 (d, *J* = 8.0 Hz, 0.5H), 7.45 – 7.37 (m, 1H), 7.35 – 7.28 (m, 0.5H), 7.28 – 7.24 (m, 0.5H), 7.21 – 7.11 (m, 2H), 7.11 – 7.04 (m, 1H), 6.69 – 6.58 (m, 1H), 6.09 (d, *J* = 7.6 Hz, 0.5H), 6.04 (d, *J* = 7.7 Hz, 0.5H), 4.94 (d, *J* = 2.6 Hz, 0.5H), 4.84 (d, *J* = 2.1 Hz, 0.5H), 3.80 (d, *J* = 2.3 Hz, 0.5H), 3.78 (d, *J* = 2.8 Hz, 0.5H), 2.64 – 2.33 (m, 2H), 2.33 – 2.27 (m, 3H), 1.63 – 1.33 (m, 2H), 0.77 (s, 1.5H), 0.58 (s, 1.5H), 0.57 (s, 1.5H), 0.30 (s, 1.5H).

**<sup>13</sup>C NMR (101 MHz, CDCl<sub>3</sub>)** δ 170.19, 170.10, 156.57, 156.29, 149.53, 148.95, 144.78, 144.53, 138.73, 138.67, 137.69, 137.38, 133.15, 132.33, 129.50, 129.20, 128.70, 128.45, 128.29, 127.88, 125.61, 124.89, 123.94, 123.54, 123.41, 123.39, 123.06, 122.78, 120.26, 119.48, 115.82, 115.42, 69.56, 68.24, 60.96, 60.23, 50.99, 50.66, 35.78, 35.24, 34.58, 34.34, 31.43, 31.32, 26.95, 26.15, 22.56, 21.97, 21.16, 21.08.

**HRMS (ESI)** calcd for  $C_{28}H_{27}N_3O$  ( $M+Na$ )<sup>+</sup>: 444.2046, found: 444.2050.

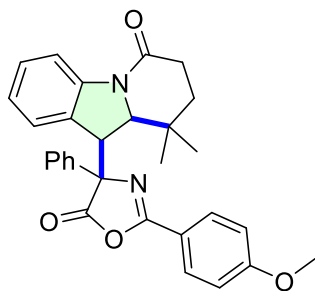

**<sup>1</sup>H NMR (400 MHz, CDCl<sub>3</sub>)** δ 8.08 (d, *J* = 8.1 Hz, 0.5H), 7.98 (d, *J* = 8.1 Hz, 0.5H), 7.88 – 7.79 (m, 1H), 7.79 – 7.74 (m, 1H), 7.72 – 7.66 (m, 1H), 7.62 – 7.55 (m, 1H), 7.38 – 7.23 (m, 3H), 7.16 – 7.06 (m, 1H), 7.00 (t, *J* = 7.8 Hz, 0.5H), 6.90 – 6.84 (m, 1H), 6.82 – 6.76 (m, 1H), 6.76 – 6.70 (m, 1H), 6.65 (t, *J* = 7.5 Hz, 0.5H), 4.00 (d, *J* = 3.1 Hz, 0.5H), 3.99 (d, *J* = 2.8 Hz, 0.5H), 3.90 (d, *J* = 2.5 Hz, 0.5H), 3.82 (d, *J* = 2.9 Hz, 0.5H), 3.77 (s, 1.5H), 3.71 (s, 1.5H), 2.57 – 2.22 (m, 2H), 1.57 – 1.29 (m, 2H), 0.50 – 0.41 (m, 3H), 0.32 (s, 1.5H), 0.12 (s, 1.5H).

**<sup>13</sup>C NMR (151 MHz, CDCl<sub>3</sub>)** δ 178.65, 176.24, 170.06, 169.78, 163.43, 163.21, 160.41, 160.06, 144.36, 144.09, 136.17, 135.57, 130.00, 129.83, 129.43, 129.39, 128.88, 128.82, 128.76, 128.71, 127.28, 127.18, 126.75, 126.64, 125.76, 123.76, 123.33, 122.78, 117.74, 117.46, 115.57, 115.28, 114.33, 114.02, 67.33, 66.47, 55.52, 55.43, 52.29, 52.05, 34.84, 34.41, 34.30, 33.96, 31.11, 25.64, 25.32, 25.14, 24.97, 21.42.

**HRMS (ESI)** calcd for C<sub>30</sub>H<sub>28</sub>N<sub>2</sub>O<sub>4</sub> (M+H)<sup>+</sup>: 481.2122, found: 481.2123.

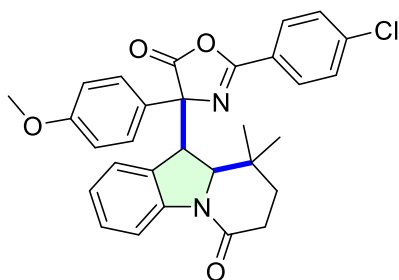

**<sup>1</sup>H NMR (400 MHz, CDCl<sub>3</sub>)** δ 8.19 – 7.95 (m, 1H), 7.89 – 7.80 (m, 1H), 7.78 – 7.70 (m, 0.7H), 7.69 – 7.56 (m, 1.5H), 7.54 – 7.44 (m, 0.6H), 7.39 – 7.23 (m, 2H), 7.21 – 7.19 (m, 0.7H), 7.17 – 7.10 (m, 0.9H), 7.08 – 6.65 (m, 4H), 4.62 – 3.87 (m, 1.6H), 3.87 – 3.56 (m, 4.3H), 2.66 – 2.17 (m, 2H), 1.64 – 1.31 (m, 2H), 1.10 – 0.17 (m, 6H).

**<sup>13</sup>C NMR (101 MHz, CDCl<sub>3</sub>)** δ 178.32, 176.14, 169.99, 169.73, 163.57, 163.35, 160.63, 144.35, 144.11, 135.06, 134.96, 134.67, 134.07, 130.07, 129.89, 129.57, 128.87, 128.84, 128.71, 128.63, 128.56, 128.28, 126.38, 126.25, 125.74, 123.74, 123.54, 123.36, 122.84, 117.47, 117.19, 115.59, 115.31, 114.40, 114.08, 76.74, 76.45, 68.82, 67.34, 66.59, 55.55, 55.50, 55.45, 53.00, 52.25, 51.95, 49.48, 35.74, 34.87, 34.42, 34.25, 31.08, 26.15, 25.63, 25.46, 22.70, 21.43, 21.39.

**HRMS (ESI)** calcd for C<sub>30</sub>H<sub>27</sub>ClN<sub>2</sub>O<sub>4</sub> (M+H)<sup>+</sup>: 515.1732, found: 515.1730.

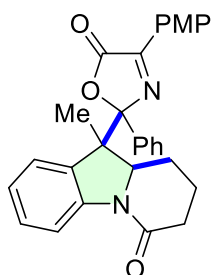

**<sup>1</sup>H NMR (400 MHz, CDCl<sub>3</sub>)** δ 8.17 – 8.03 (m, 1H), 8.00 – 7.92 (m, 1H), 7.75 (m, 3H), 7.35 – 7.20 (m, 4H), 7.16 – 7.01 (m, 1H), 6.98 – 6.78 (m, 3H), 4.79 (dd, *J* = 11.7, 2.6 Hz, 0.5H), 4.70 (dd, *J* = 11.9, 2.8 Hz, 0.5H), 3.82 (s, 1.5H),

3.75 (s, 1.5H), 2.62 – 2.21 (m, 2H), 1.85 – 1.67 (m, 2H), 1.67 – 1.50 (m, 1H), 1.42 (s, 1.5H), 1.37 (s, 1.5H), 1.31 – 1.20 (m, 2H), 1.05 – 0.67 (m, 1H).

**<sup>13</sup>C NMR (101 MHz, CDCl<sub>3</sub>)** δ 177.43, 176.96, 168.92, 168.75, 163.54, 163.27, 160.11, 159.25, 141.74, 141.51, 134.55, 134.37, 134.15, 130.12, 129.88, 128.79, 128.48, 128.25, 128.21, 127.77, 127.63, 124.25, 124.08, 123.27, 117.87, 117.68, 117.20, 116.99, 114.42, 114.12, 64.68, 63.34, 55.57, 55.47, 54.78, 53.49, 32.23, 24.91, 24.79, 20.21, 20.15, 19.69, 18.43.

**HRMS (ESI)** calcd for C<sub>29</sub>H<sub>26</sub>N<sub>2</sub>O<sub>4</sub> (M+H)<sup>+</sup>: 467.1965, found: 467.1963.

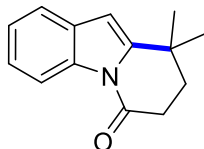

**<sup>1</sup>H NMR (400 MHz, CDCl<sub>3</sub>)** δ 8.48 (d, *J* = 7.9 Hz, 1H), 7.47 (d, *J* = 8.9 Hz, 1H), 7.32 – 7.21 (m, 2H), 6.36 (s, 1H), 2.87 (t, *J* = 6.7 Hz, 2H), 1.95 (t, *J* = 6.7 Hz, 2H), 1.43 (s, 6H).

**<sup>13</sup>C NMR (101 MHz, CDCl<sub>3</sub>)** δ 169.30, 147.40, 135.20, 129.83, 124.33, 124.05, 119.97, 116.59, 103.29, 35.29, 31.61, 31.23, 28.76.

**HRMS (ESI)** calcd for C<sub>14</sub>H<sub>15</sub>NO (M+H)<sup>+</sup>: 214.1226, found: 214.1228.

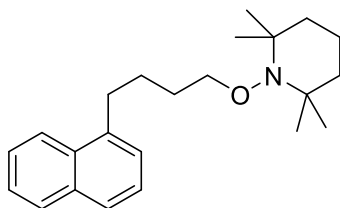

**<sup>1</sup>H NMR (400 MHz, CDCl<sub>3</sub>)** δ 8.06 (d, *J* = 8.2 Hz, 1H), 7.88 (dd, *J* = 7.5, 2.1 Hz, 1H), 7.74 (d, *J* = 8.1 Hz, 1H), 7.57 – 7.46 (m, 2H), 7.45 – 7.39 (m, 1H), 7.35 (d, *J* = 7.0 Hz, 1H), 3.14 (q, *J* = 4.5, 4.0 Hz, 2H), 2.44 (t, *J* = 6.6 Hz, 2H), 1.94 – 1.80 (m, 4H), 1.79 – 1.37 (m, 7H), 1.11 (d, *J* = 35.2 Hz, 12H).

**<sup>13</sup>C NMR (101 MHz, CDCl<sub>3</sub>)** δ 138.19, 133.92, 131.84, 128.79, 126.65, 125.98, 125.78, 125.54, 125.45, 123.79, 59.93, 38.99, 32.92, 32.82, 32.02, 30.51, 25.41, 20.54, 16.99.

**HRMS (ESI)** calcd for C<sub>23</sub>H<sub>33</sub>NO (M+H)<sup>+</sup>: 214.1226, found: 214.1228.

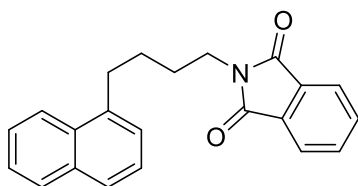

**<sup>1</sup>H NMR (400 MHz, CDCl<sub>3</sub>)** δ 8.07 (d, *J* = 7.9 Hz, 1H), 7.94 – 7.86 (m, 3H), 7.80 (dd, *J* = 5.5, 3.1 Hz, 2H), 7.75 (d, *J* = 8.1 Hz, 1H), 7.53 (dddd, *J* = 19.8, 8.0, 6.8, 1.4 Hz, 2H), 7.47 – 7.40 (m, 1H), 7.37 (d, *J* = 5.7 Hz, 1H), 3.16 (d, *J* = 7.1 Hz, 2H), 2.81 – 2.69 (m, 2H), 2.04 – 1.90 (m, 4H).

**<sup>13</sup>C NMR (101 MHz, CDCl<sub>3</sub>)** δ 169.50, 161.99, 137.79, 134.76, 133.93, 131.81, 128.95, 128.82, 126.76, 126.04, 125.87, 125.57, 125.49, 123.98, 123.73, 32.55, 30.91, 29.80, 24.72.

**HRMS (ESI)** calcd for C<sub>22</sub>H<sub>19</sub>NO<sub>2</sub> (M+H)<sup>+</sup>: 214.1226, found: 214.1228.

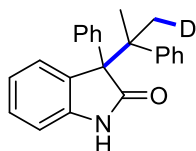

**$^1\text{H}$  NMR (400 MHz,  $\text{CDCl}_3$ )**  $\delta$  8.40 (s, 1H), 7.90 – 7.78 (m, 2H), 7.35 – 7.30 (m, 3H), 7.23 – 7.12 (m, 4H), 7.07 – 6.95 (m, 7H), 6.86 (m, 1H), 6.71 (d,  $J$  = 7.4 Hz, 1H), 6.56 (d,  $J$  = 7.2 Hz, 1H), 2.30 – 2.10 (m, 2H).

**$^{13}\text{C}$  NMR (101 MHz,  $\text{CDCl}_3$ )**  $\delta$  179.42, 146.41, 143.40, 141.16, 136.29, 132.07, 131.56, 129.69, 129.35, 128.45, 128.08, 127.48, 127.41, 127.25, 127.15, 126.53, 126.49, 121.24, 110.04, 63.45, 53.50, 28.10 – 27.58 (m, 1C).

**HRMS HRMS (ESI)** calcd for  $\text{C}_{28}\text{H}_{22}\text{DNO}$  ( $\text{M} + \text{Na}$ ) $^+$  413.1735, found 413.1738.

## 9 NMR spectra

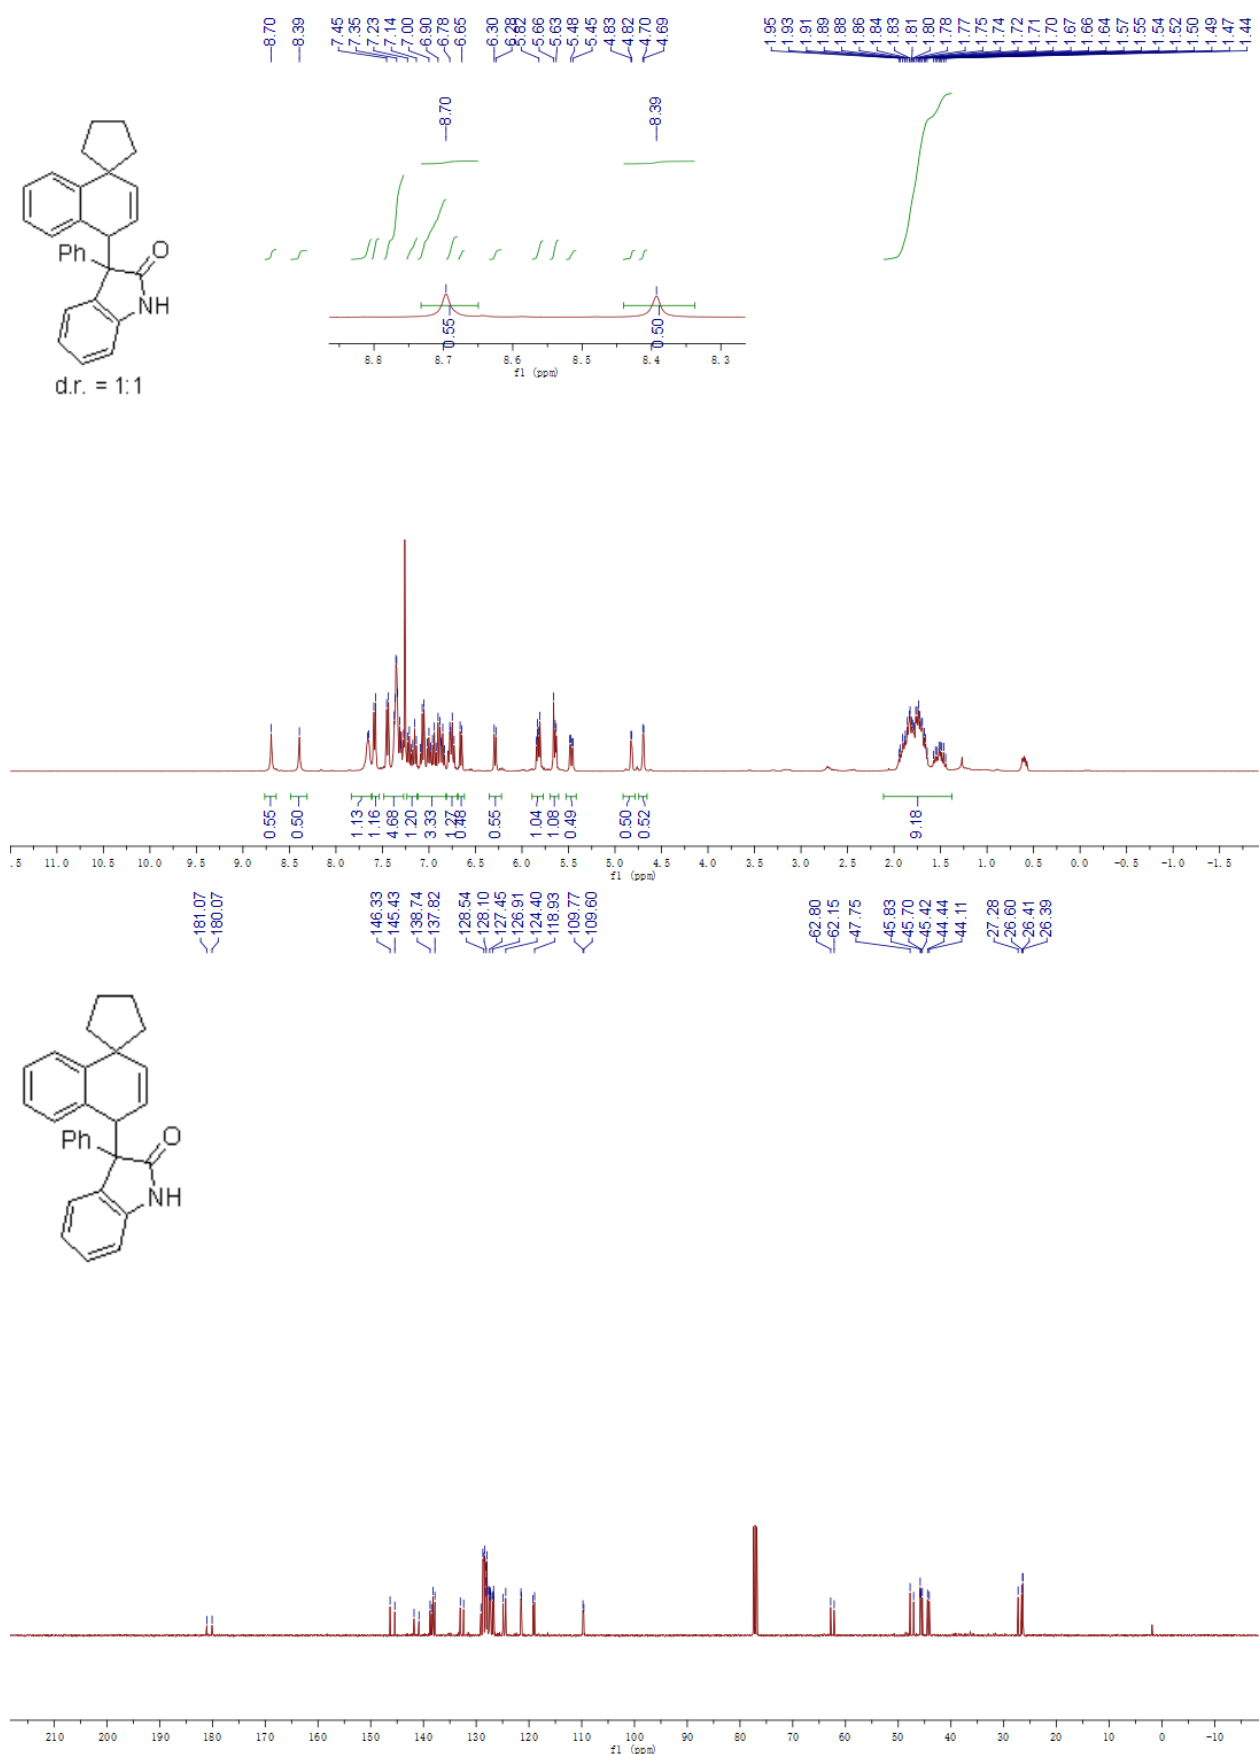



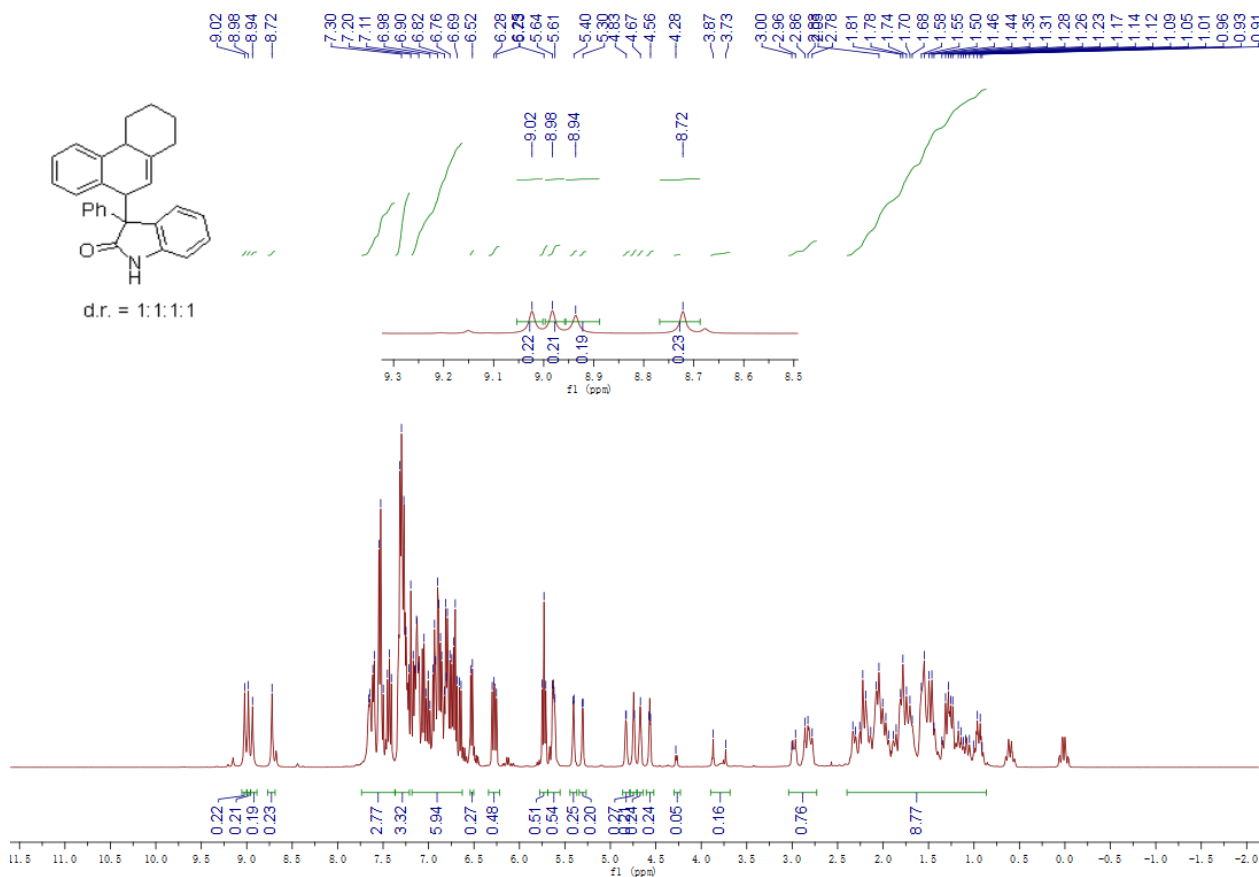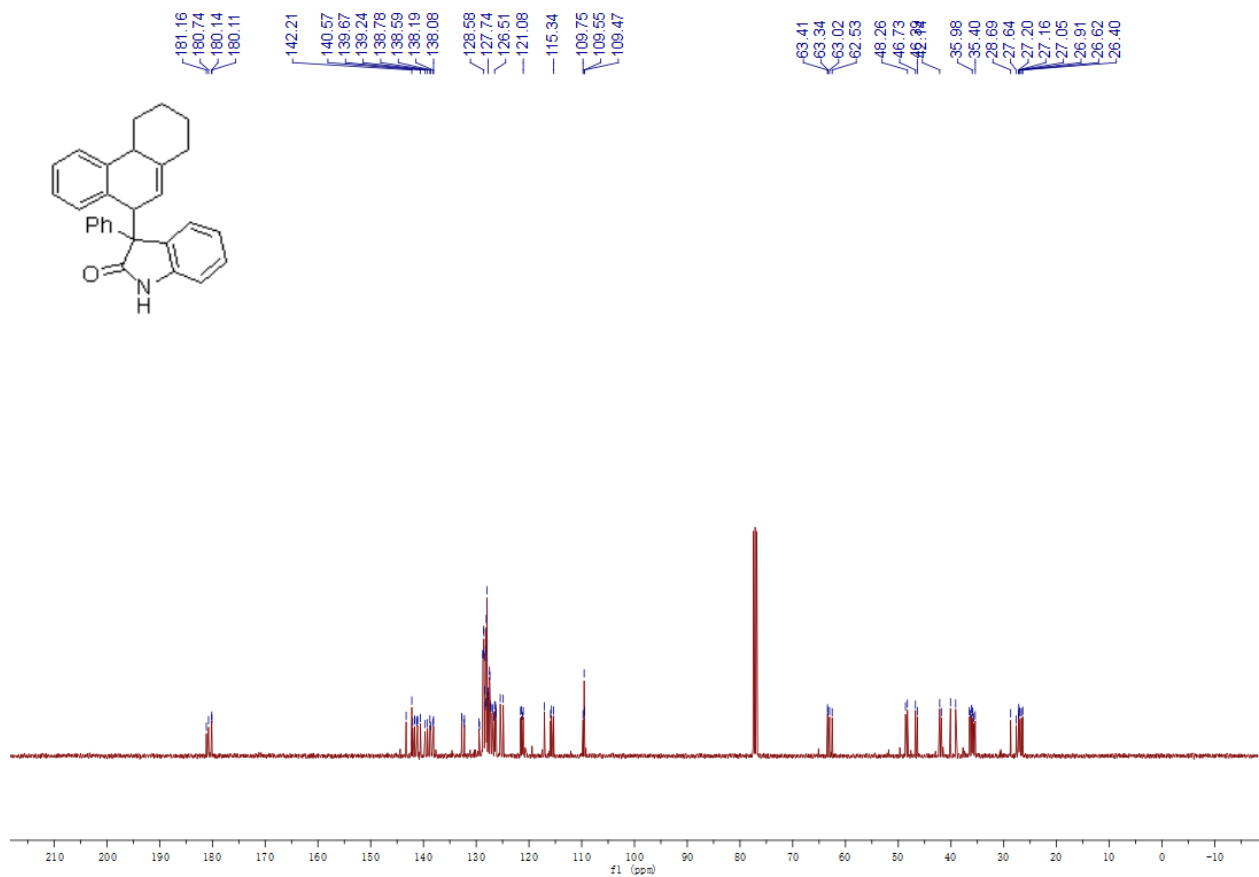

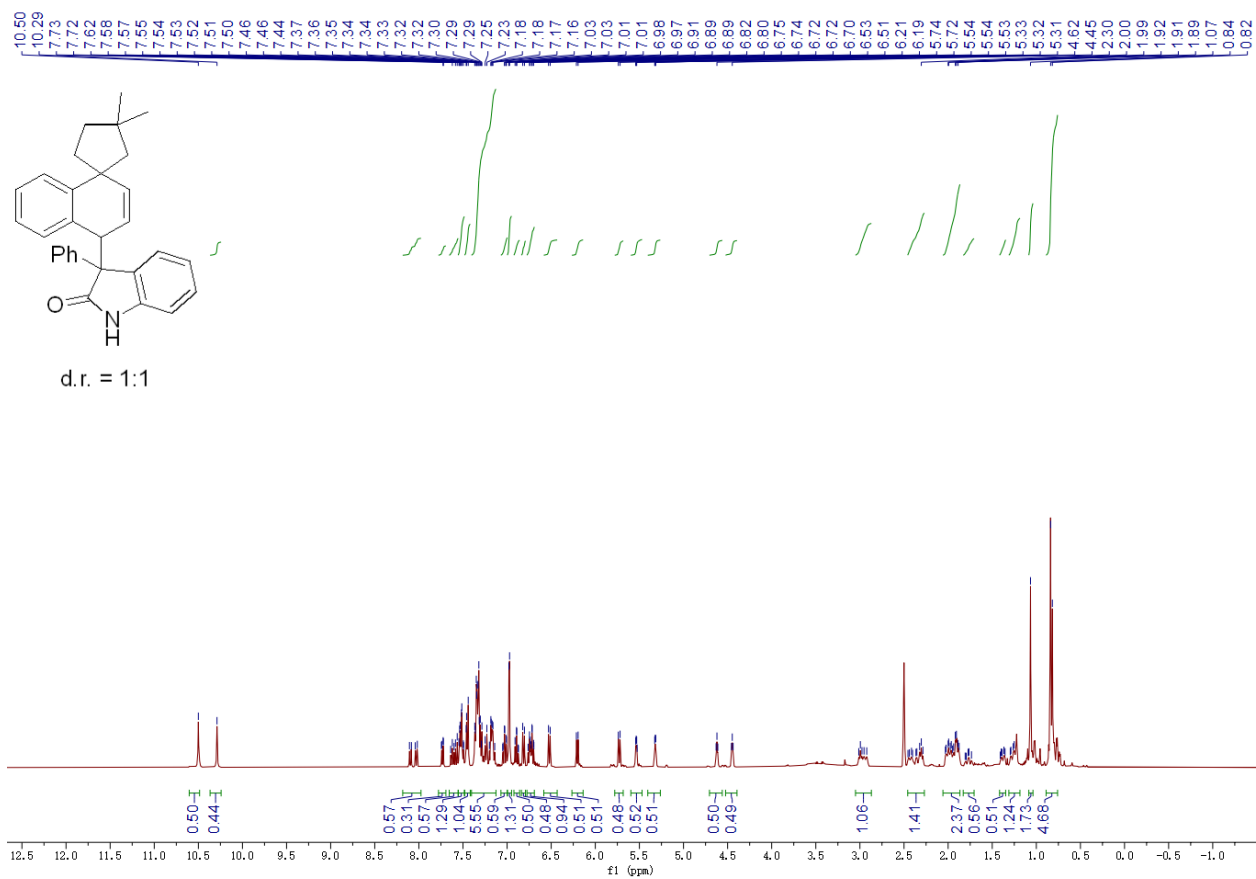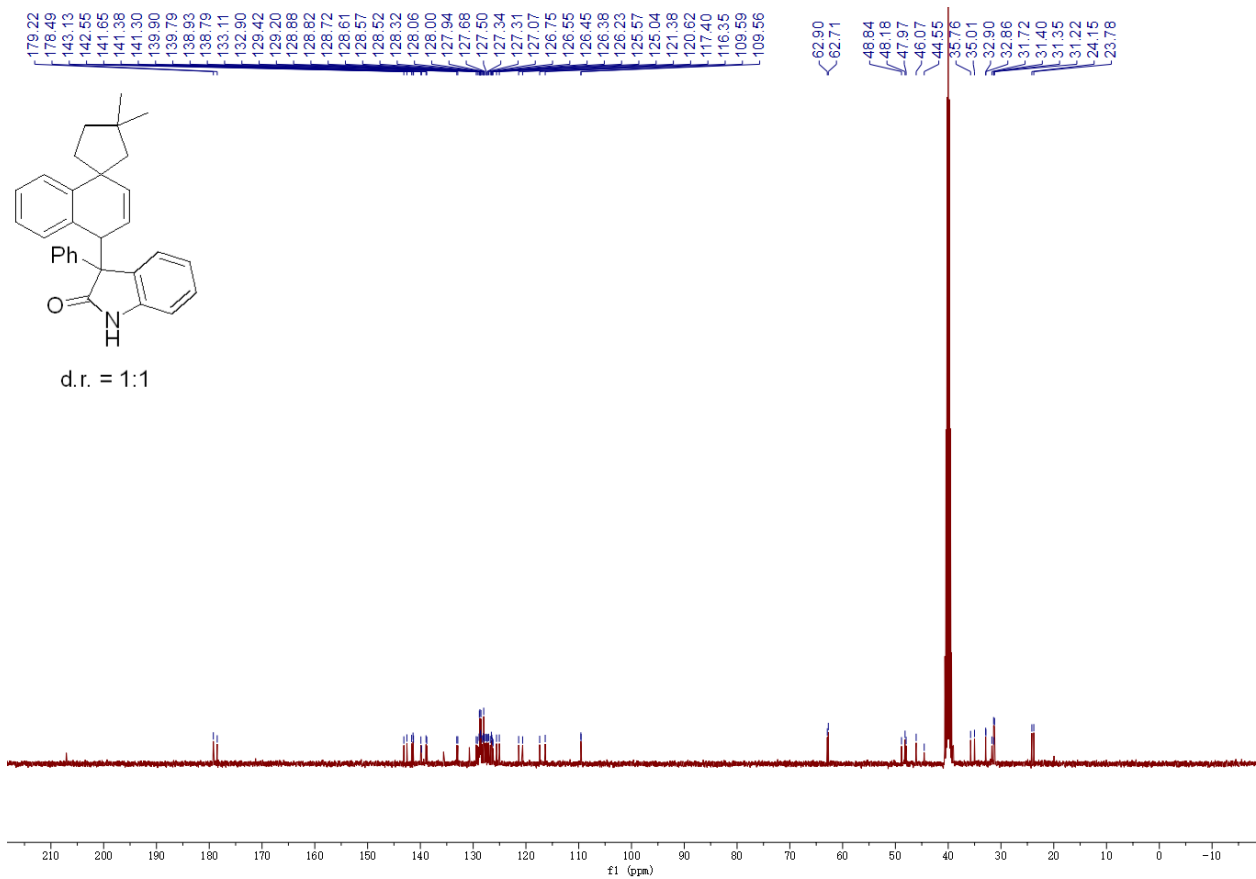

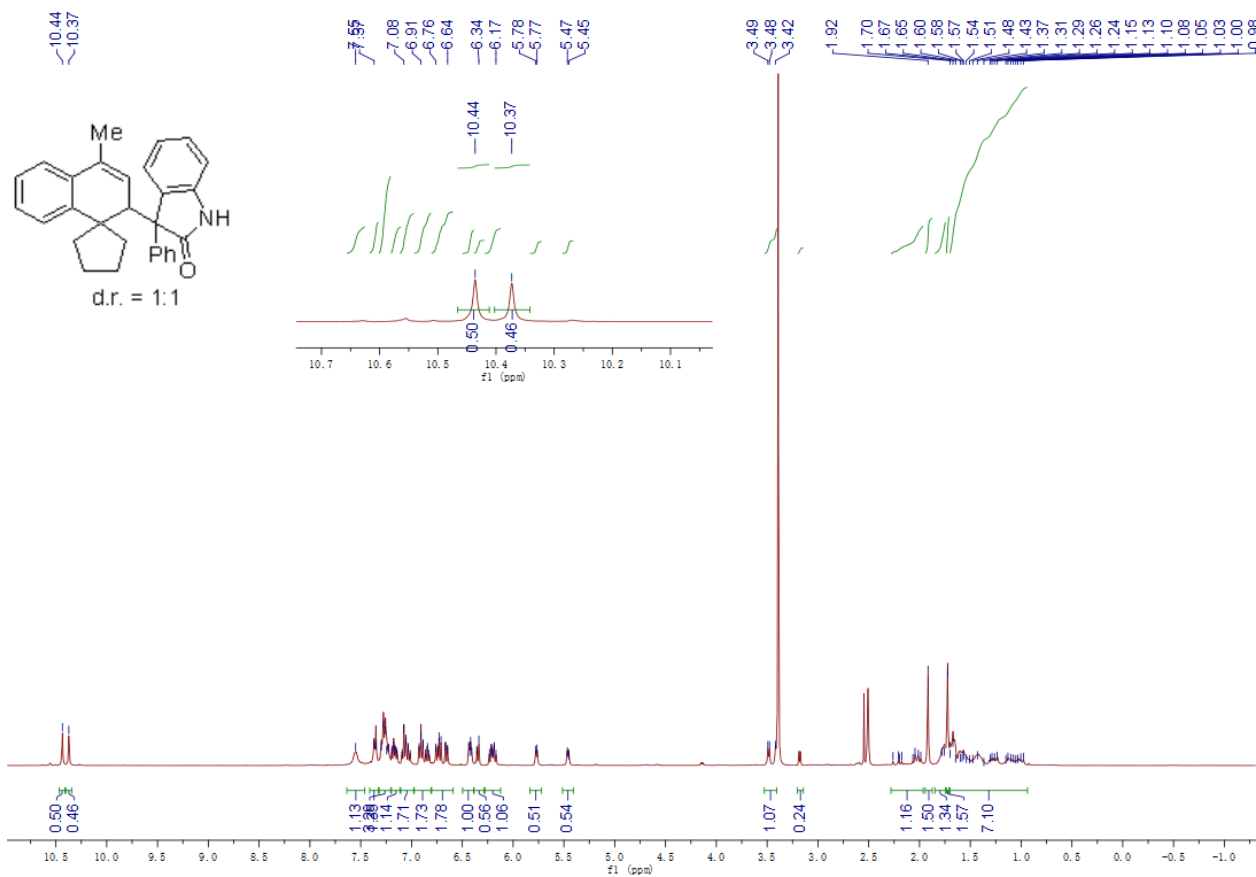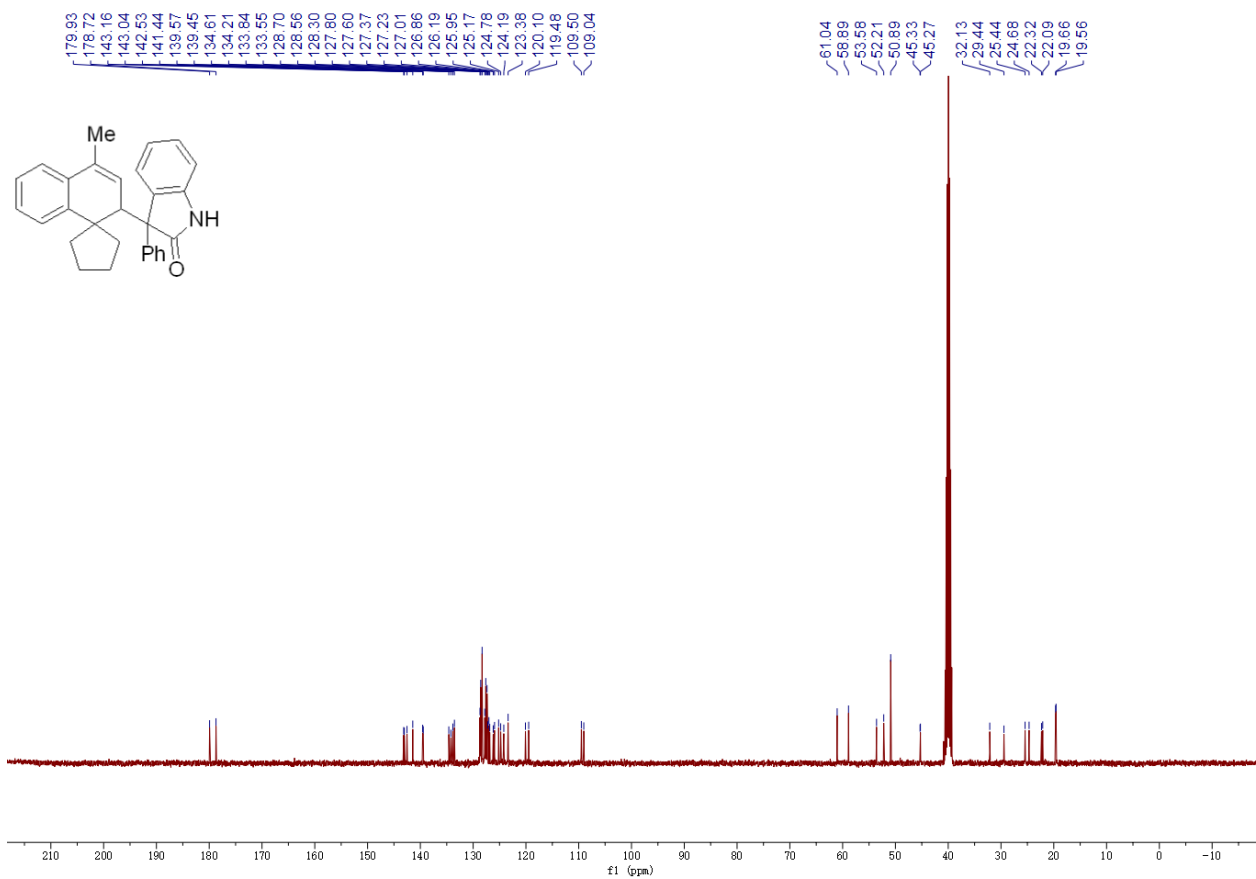

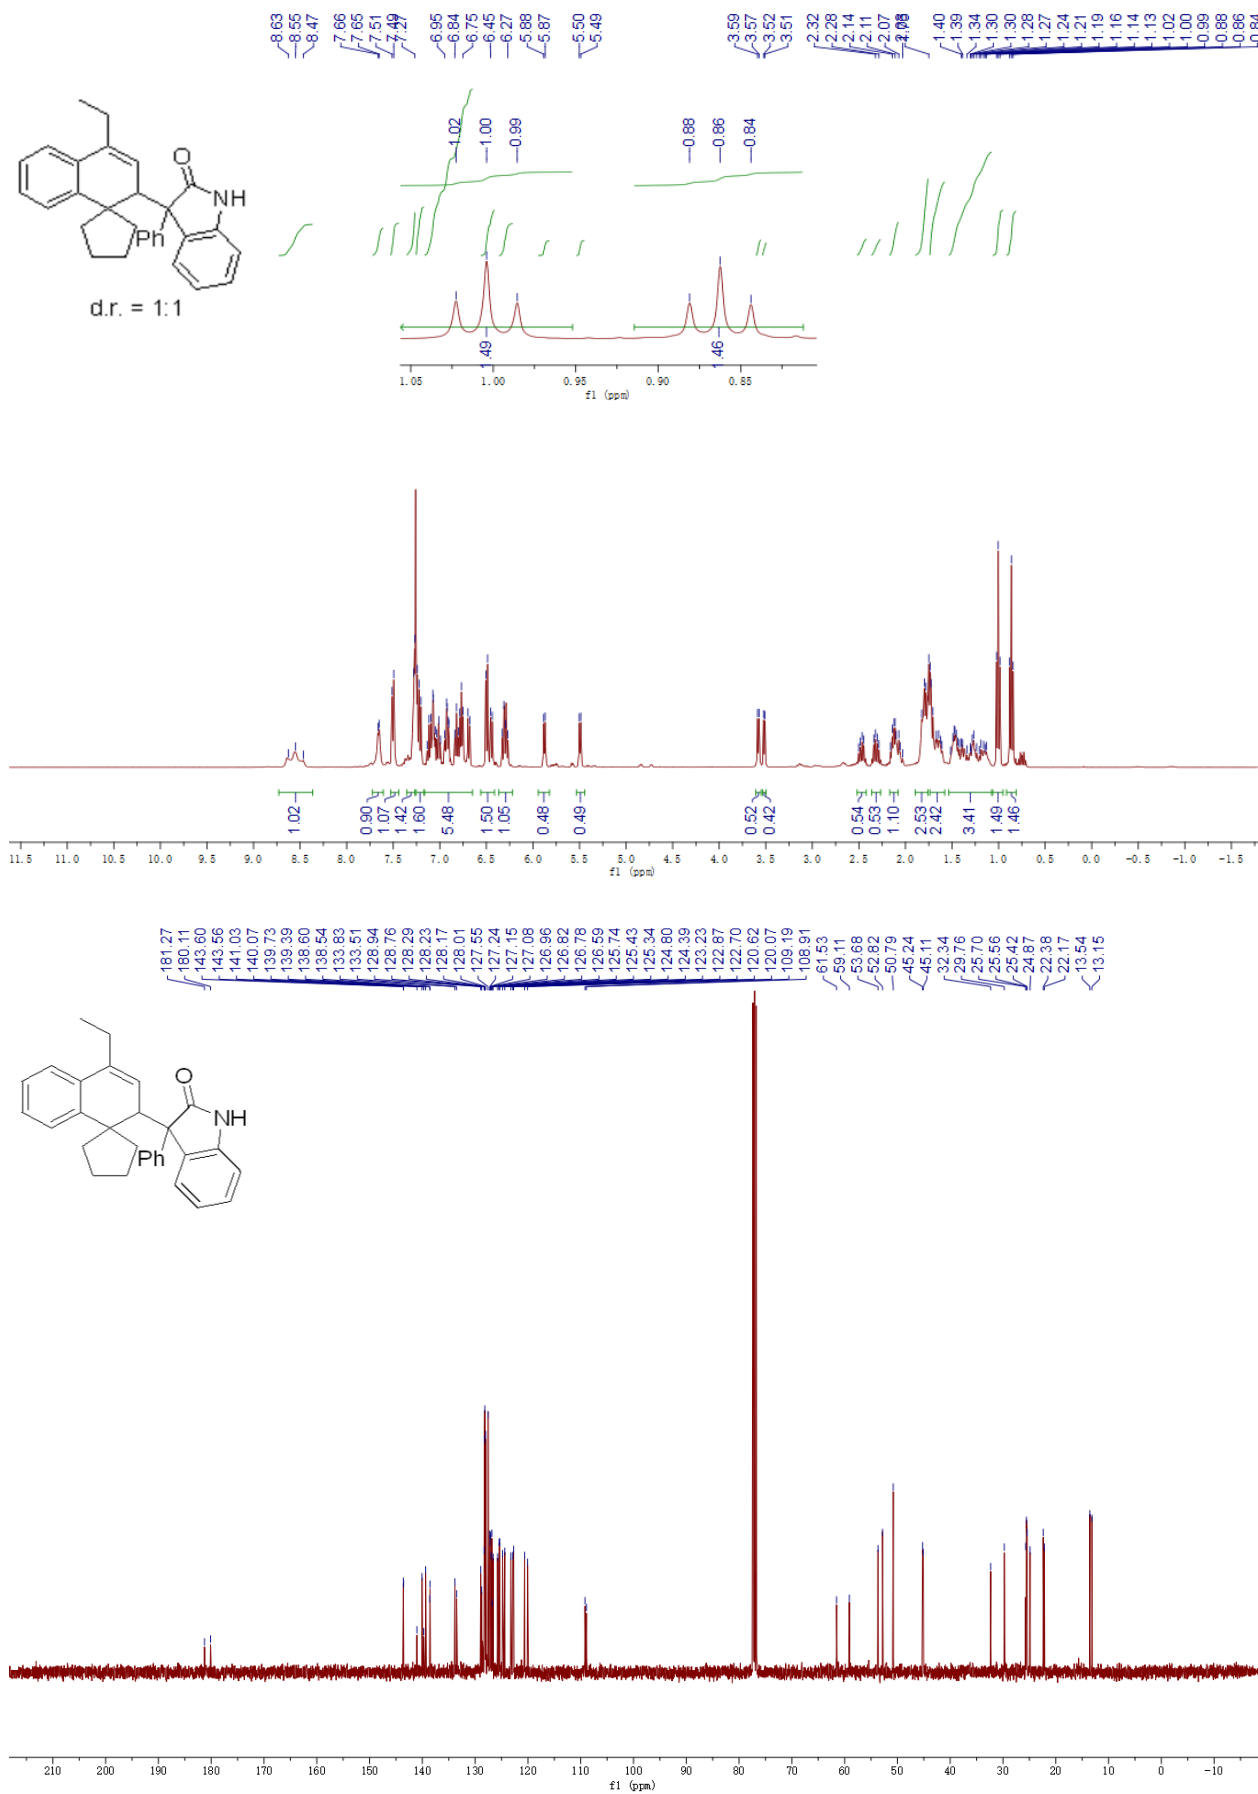

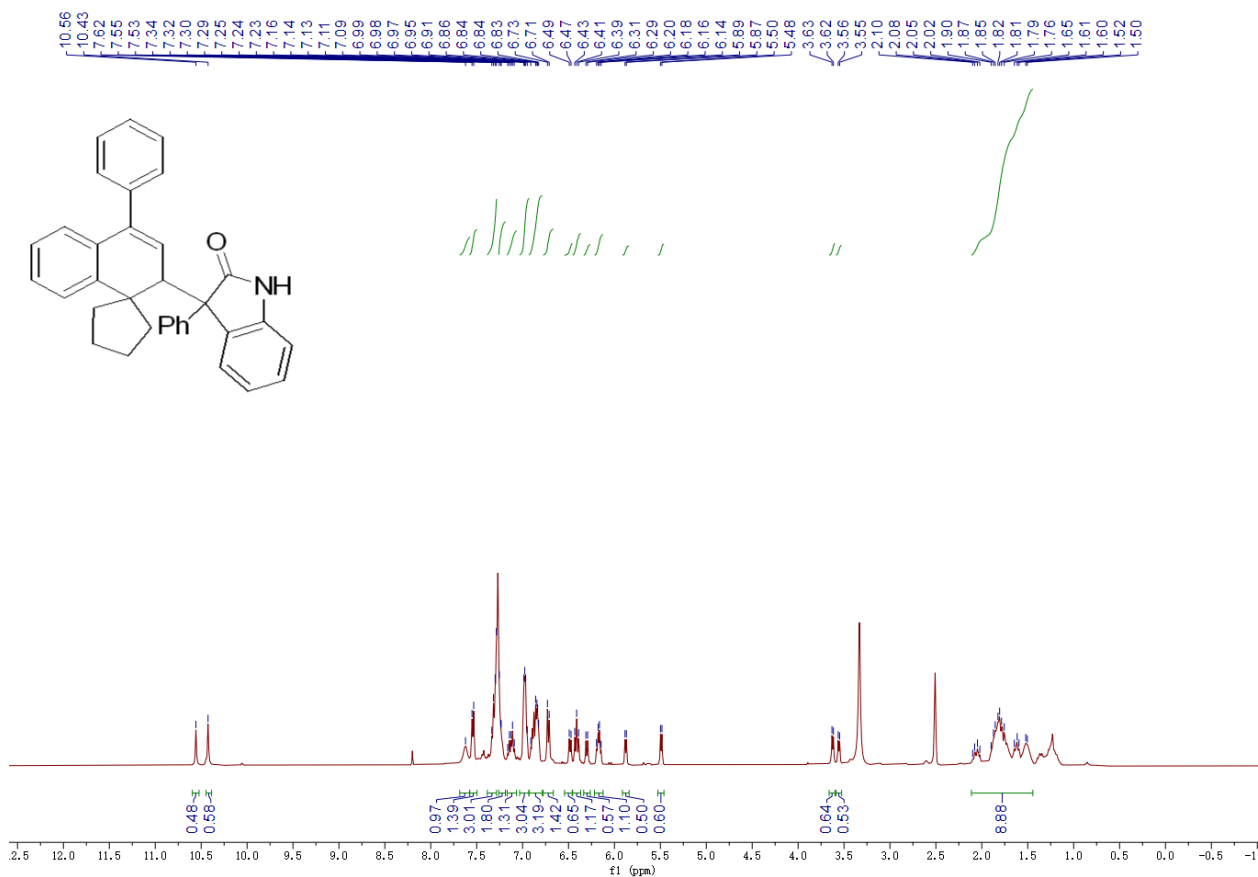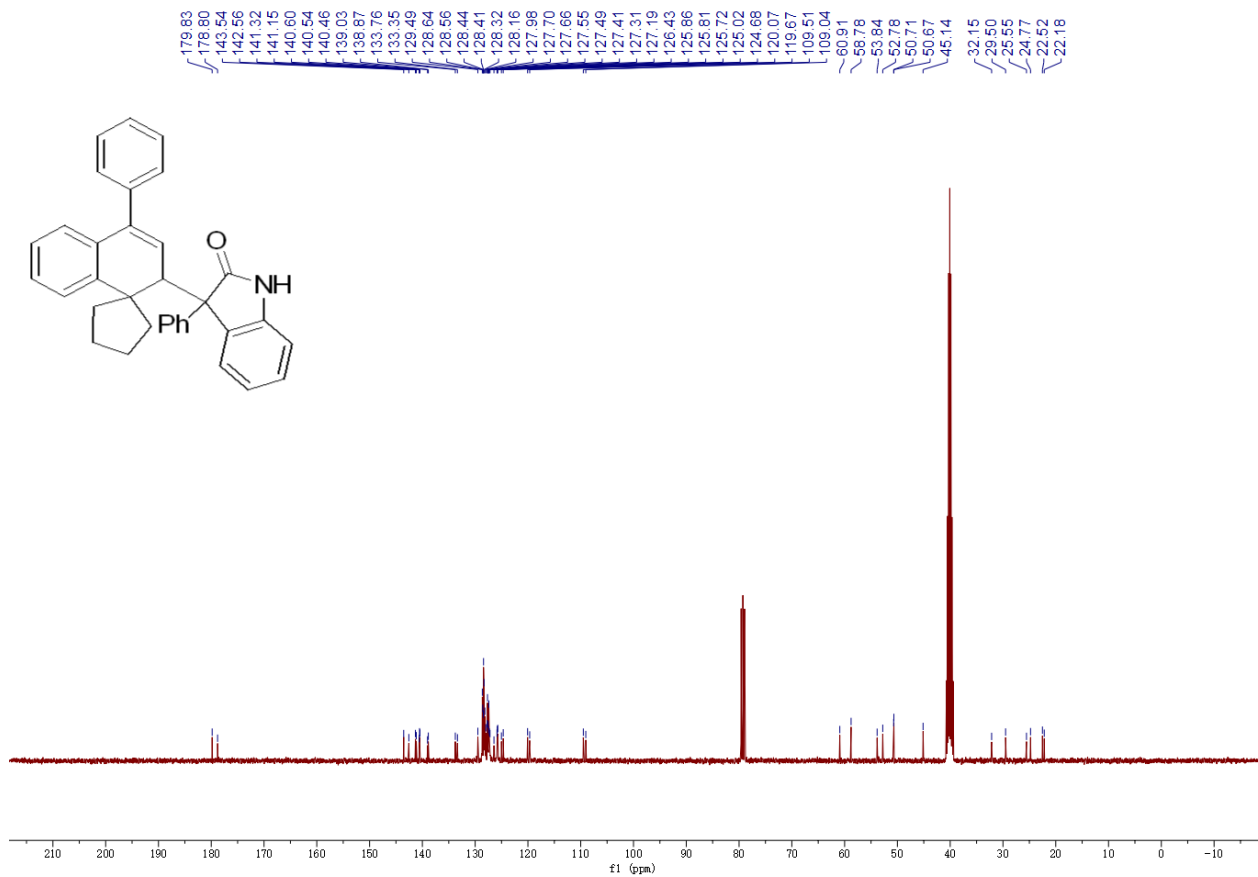

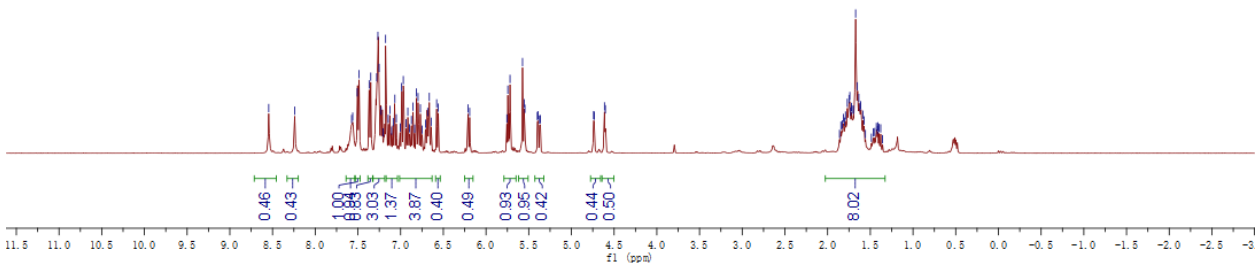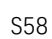

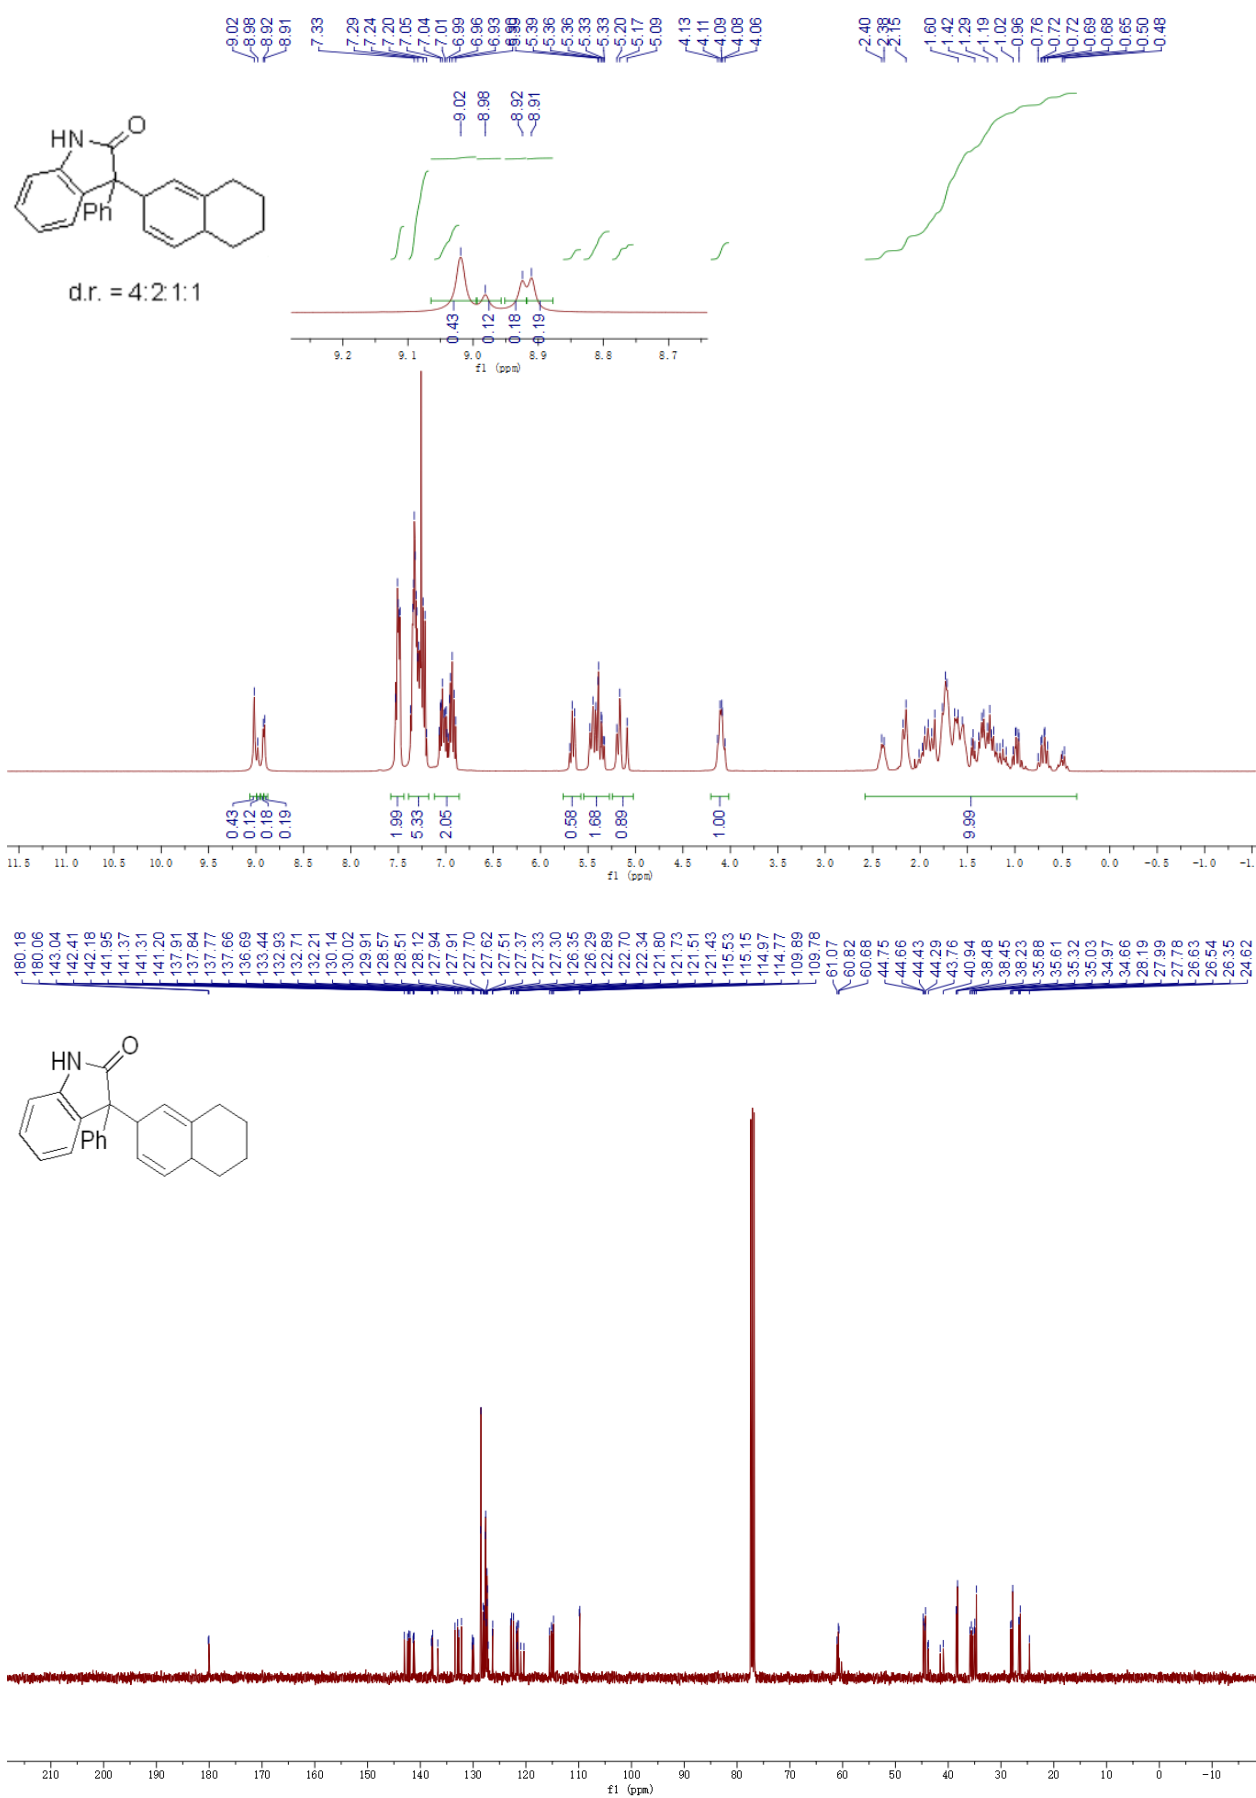

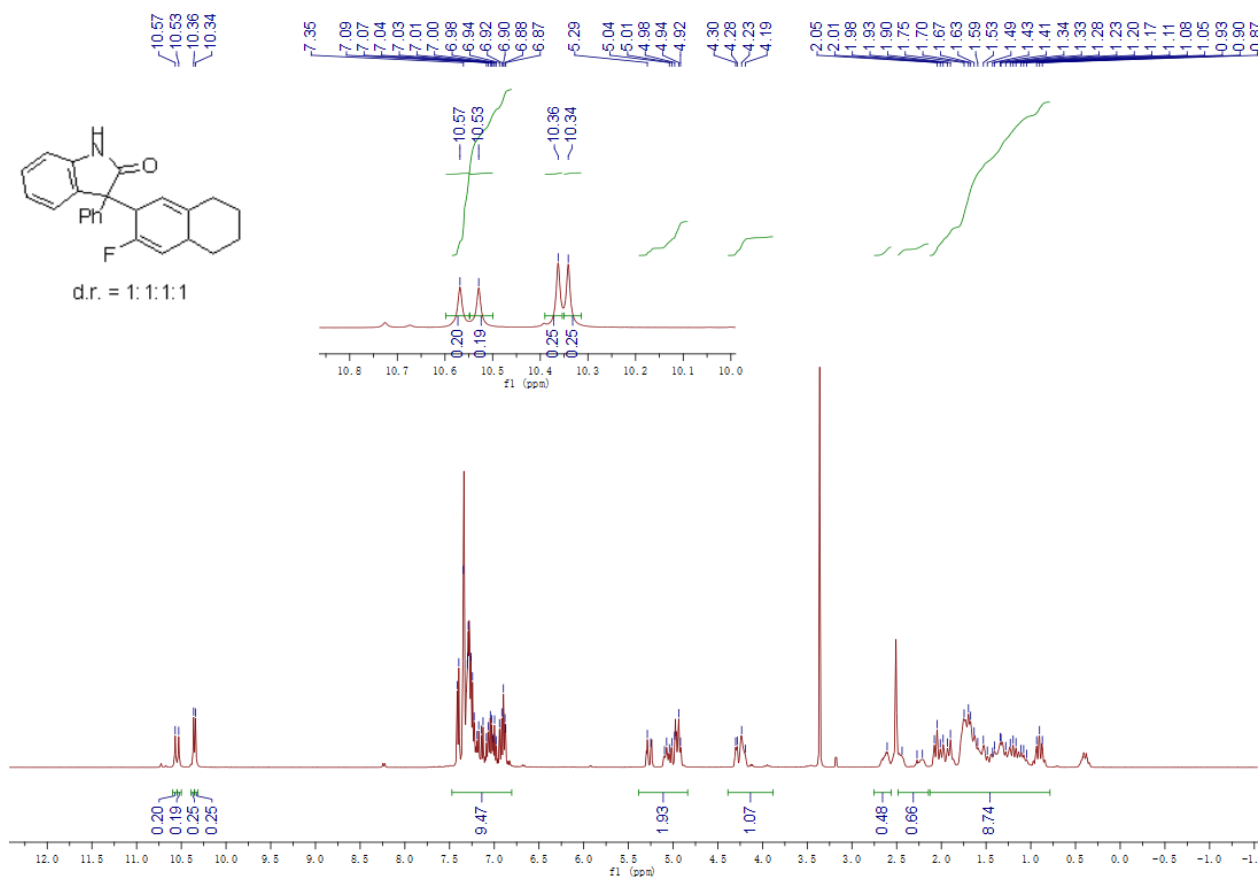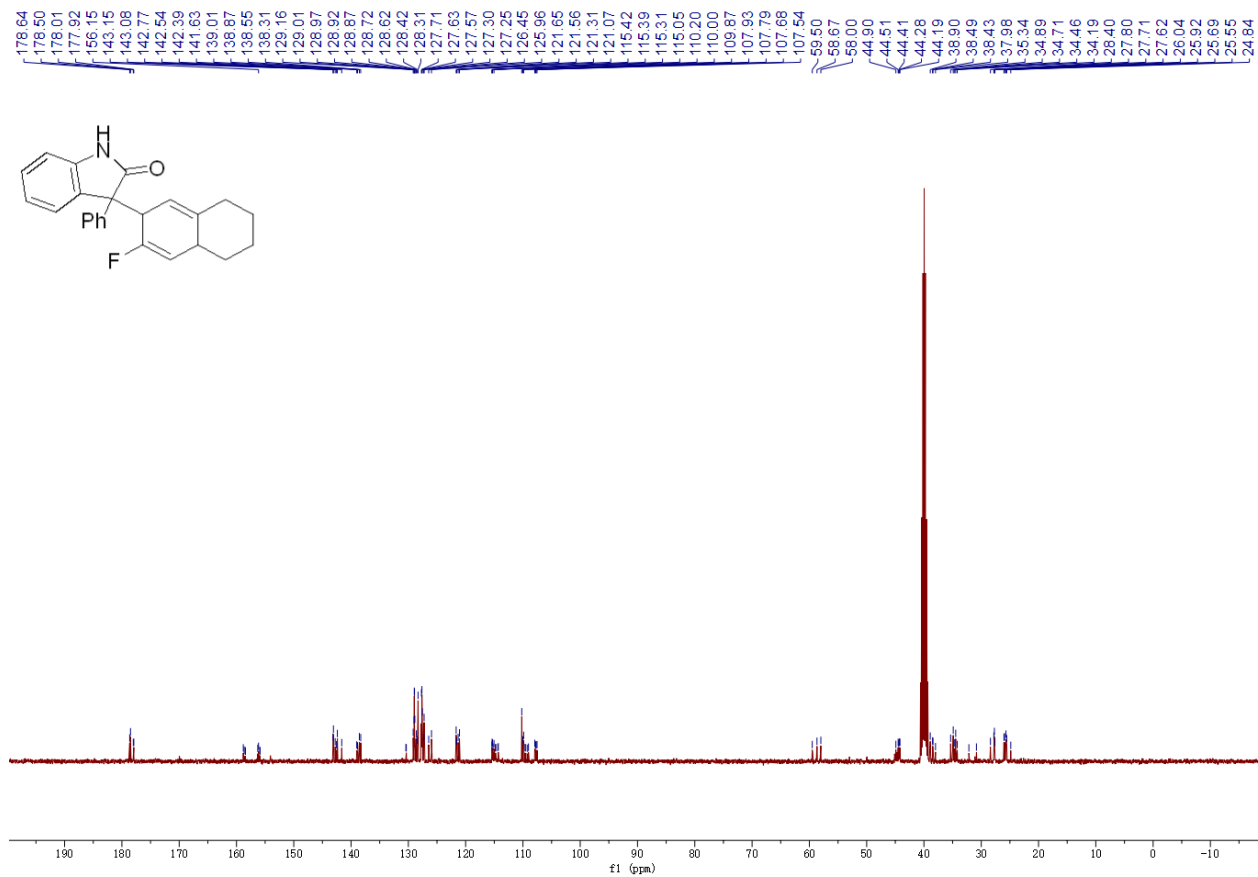



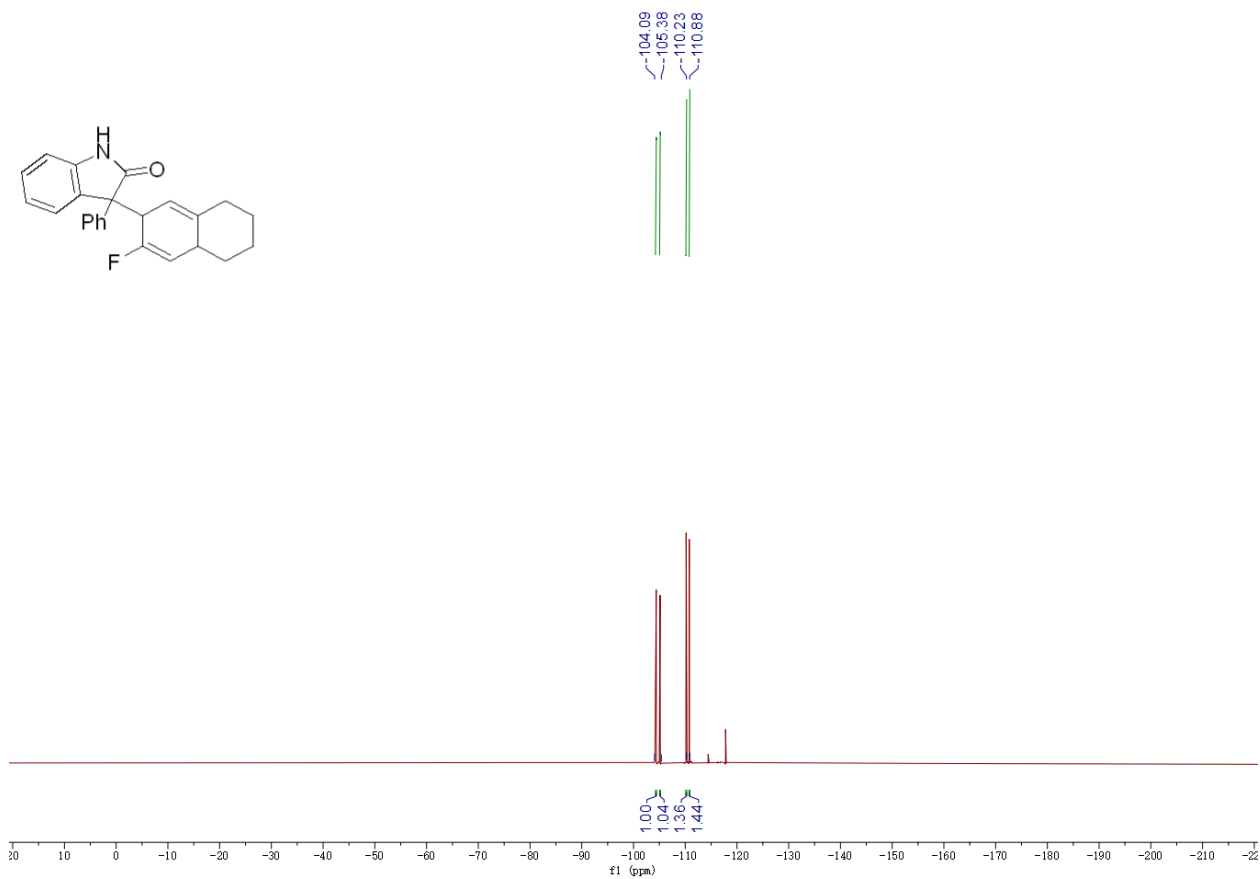

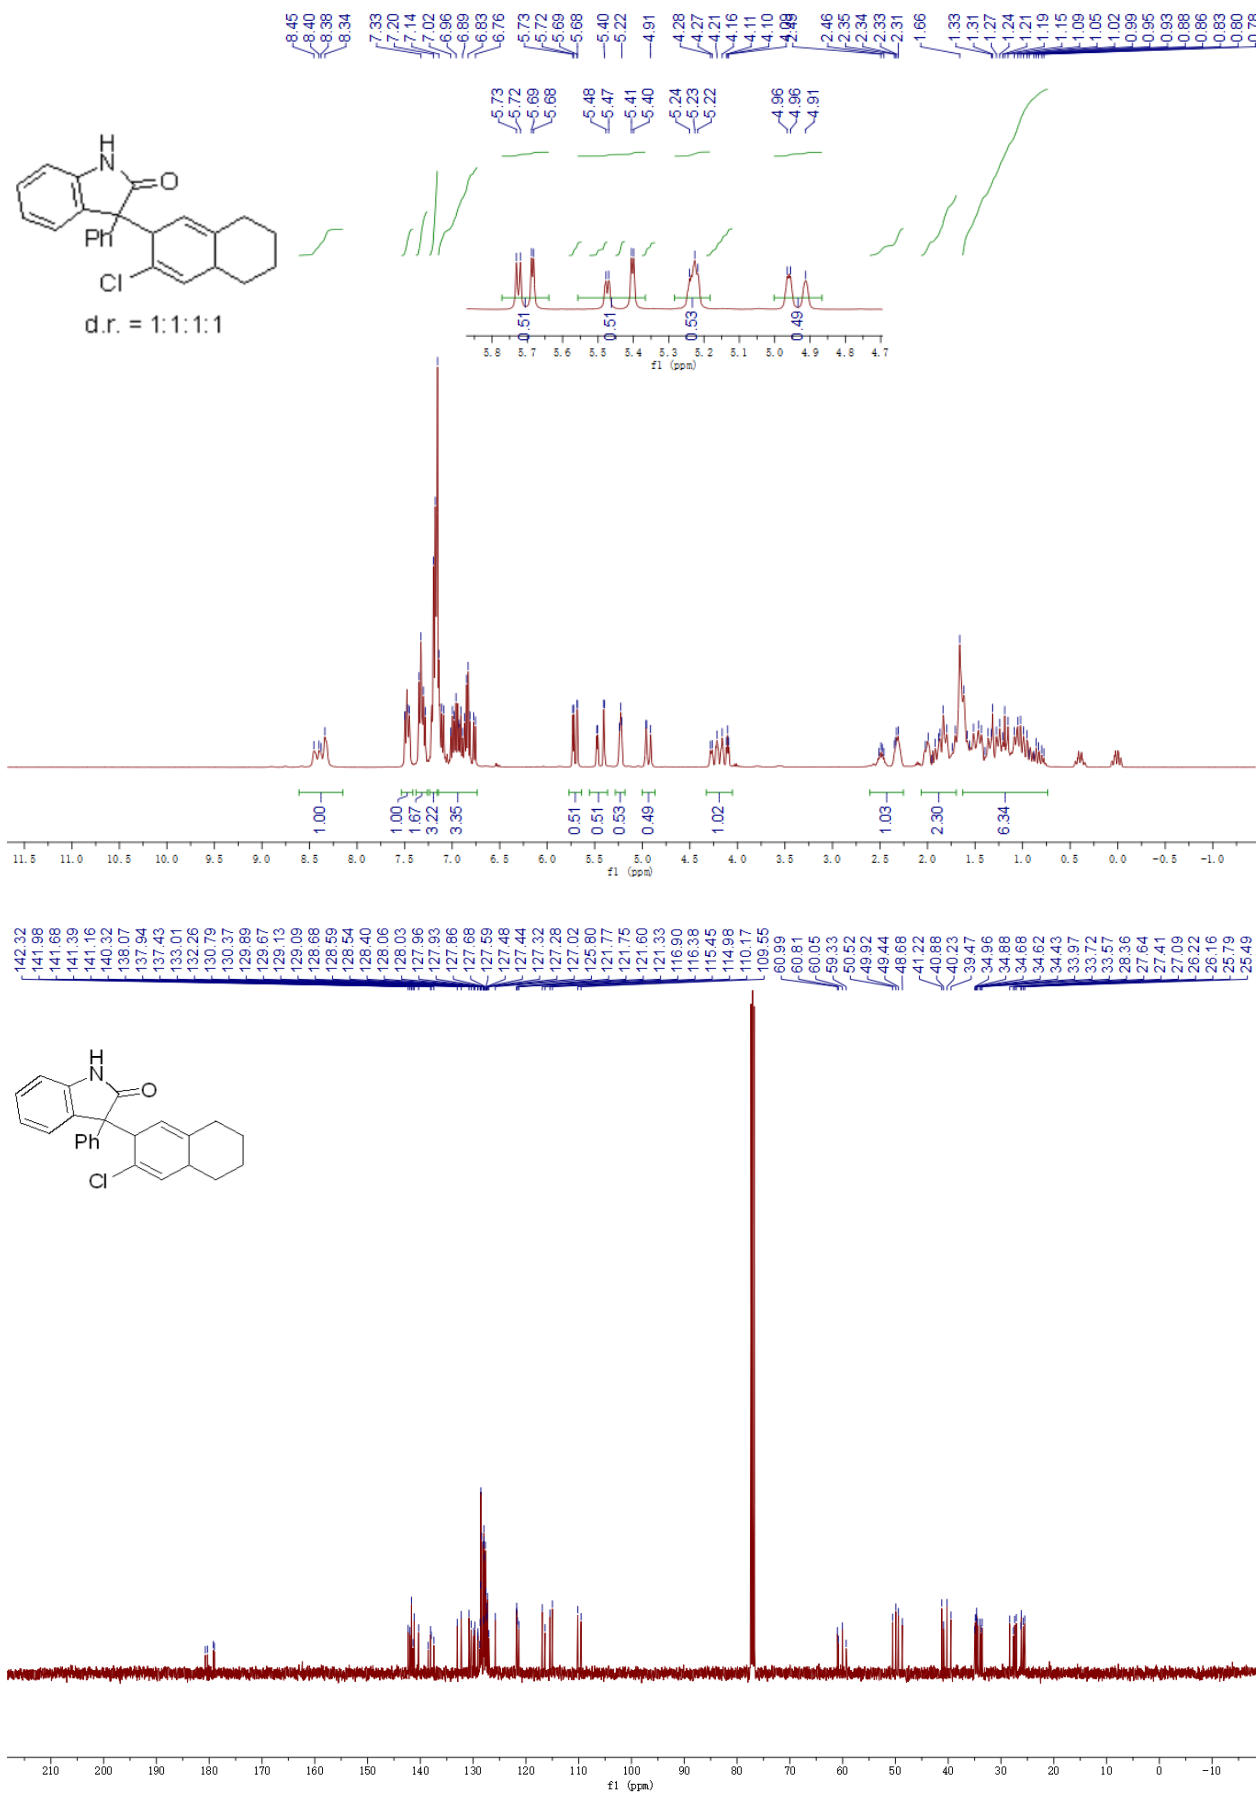

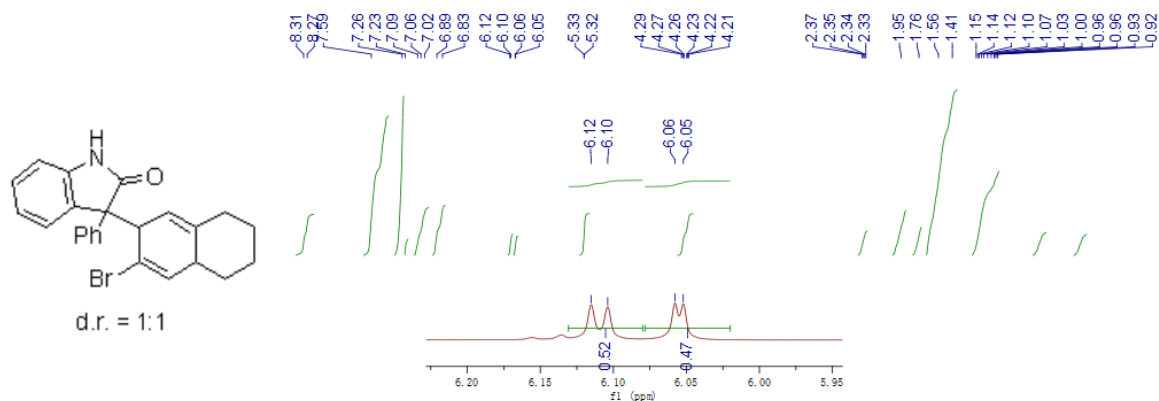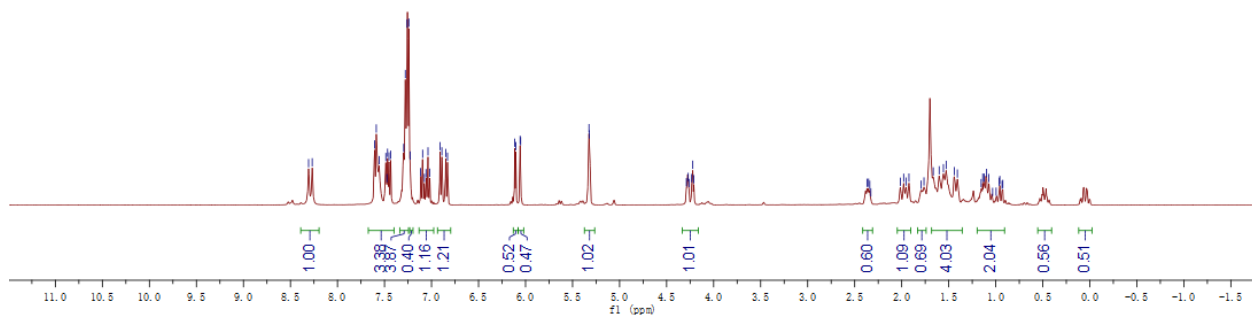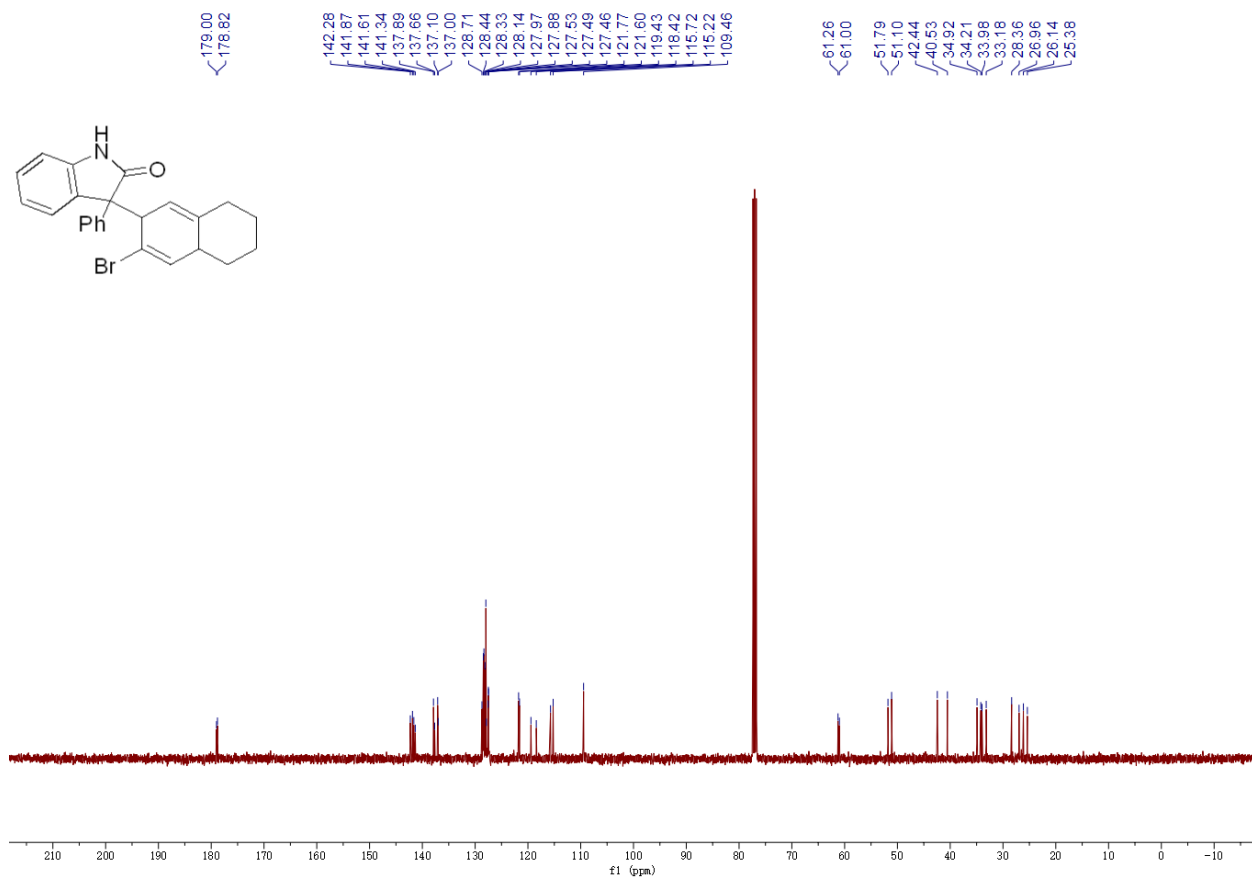

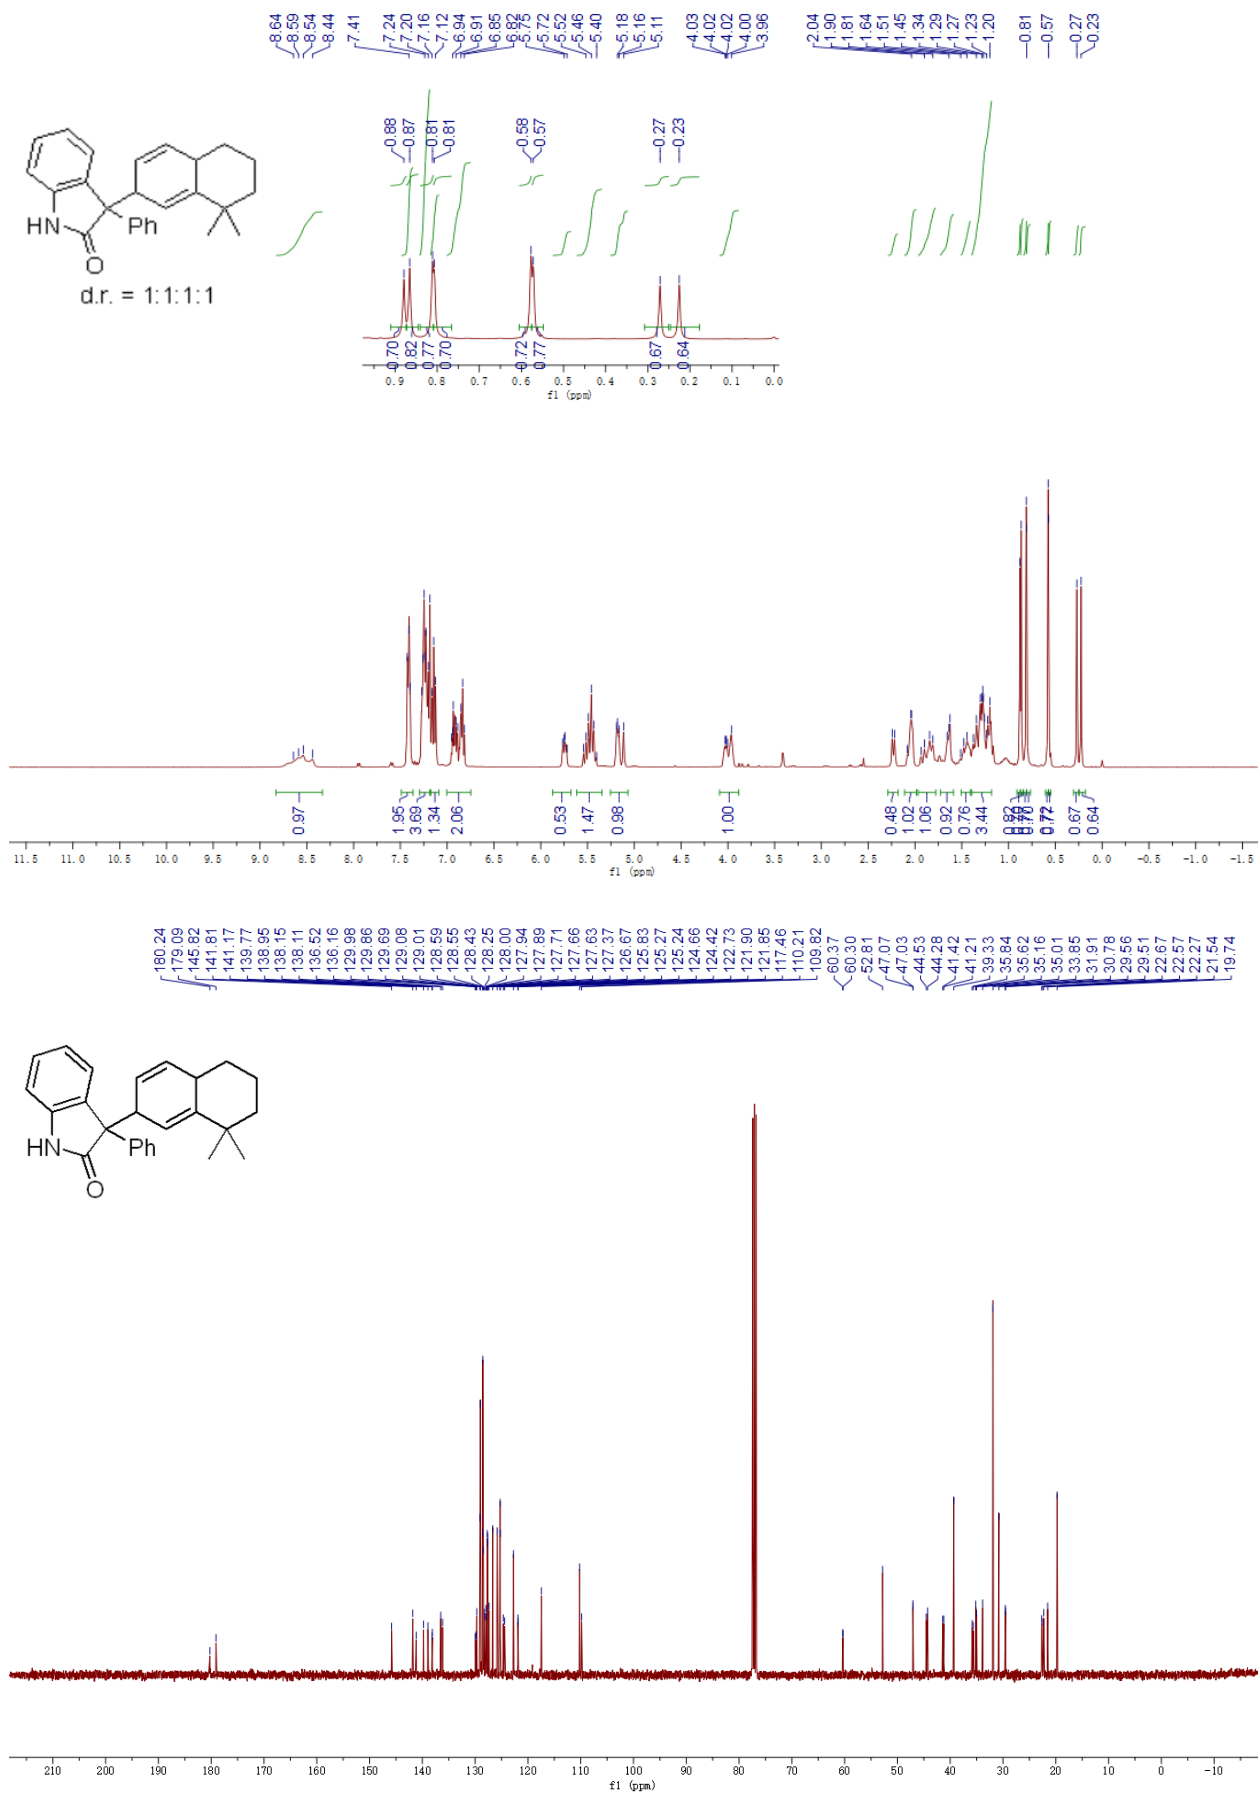



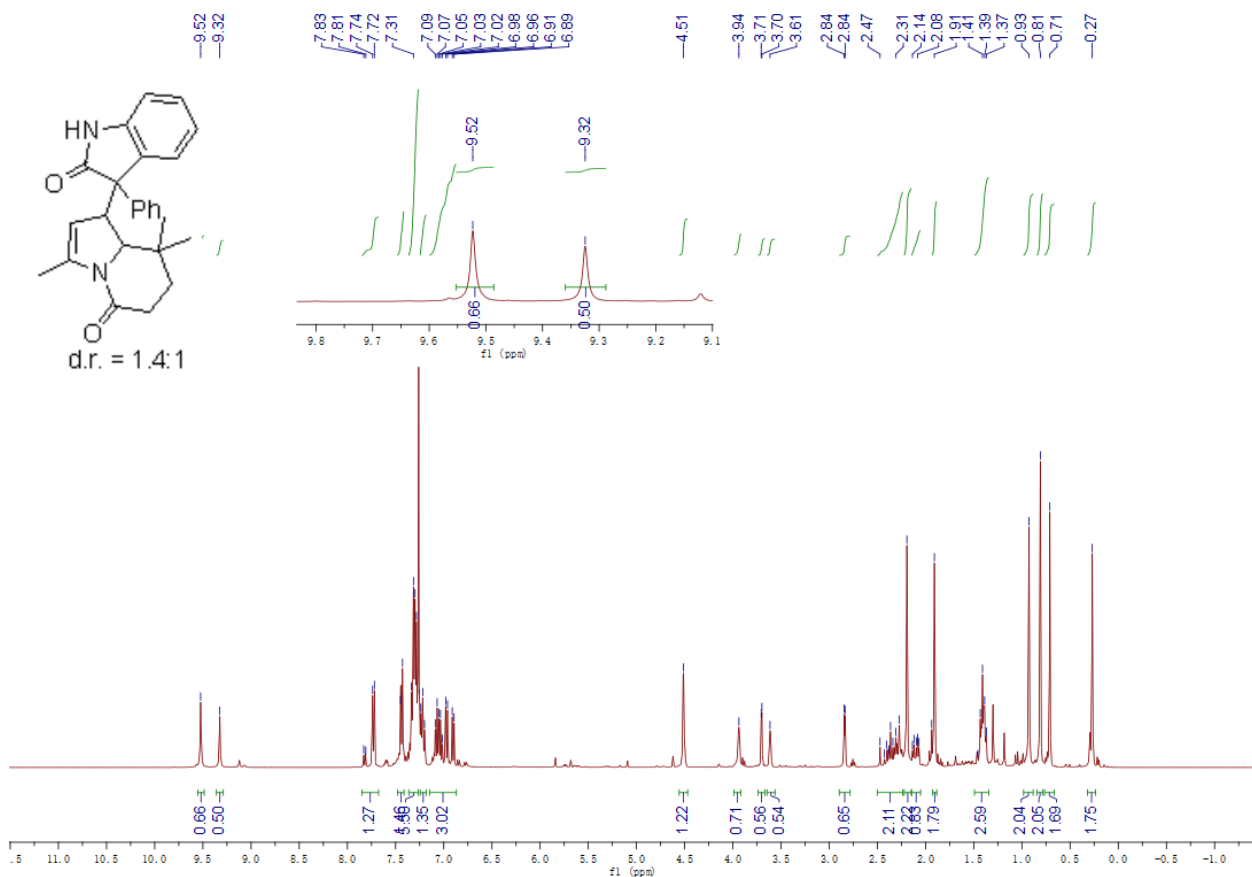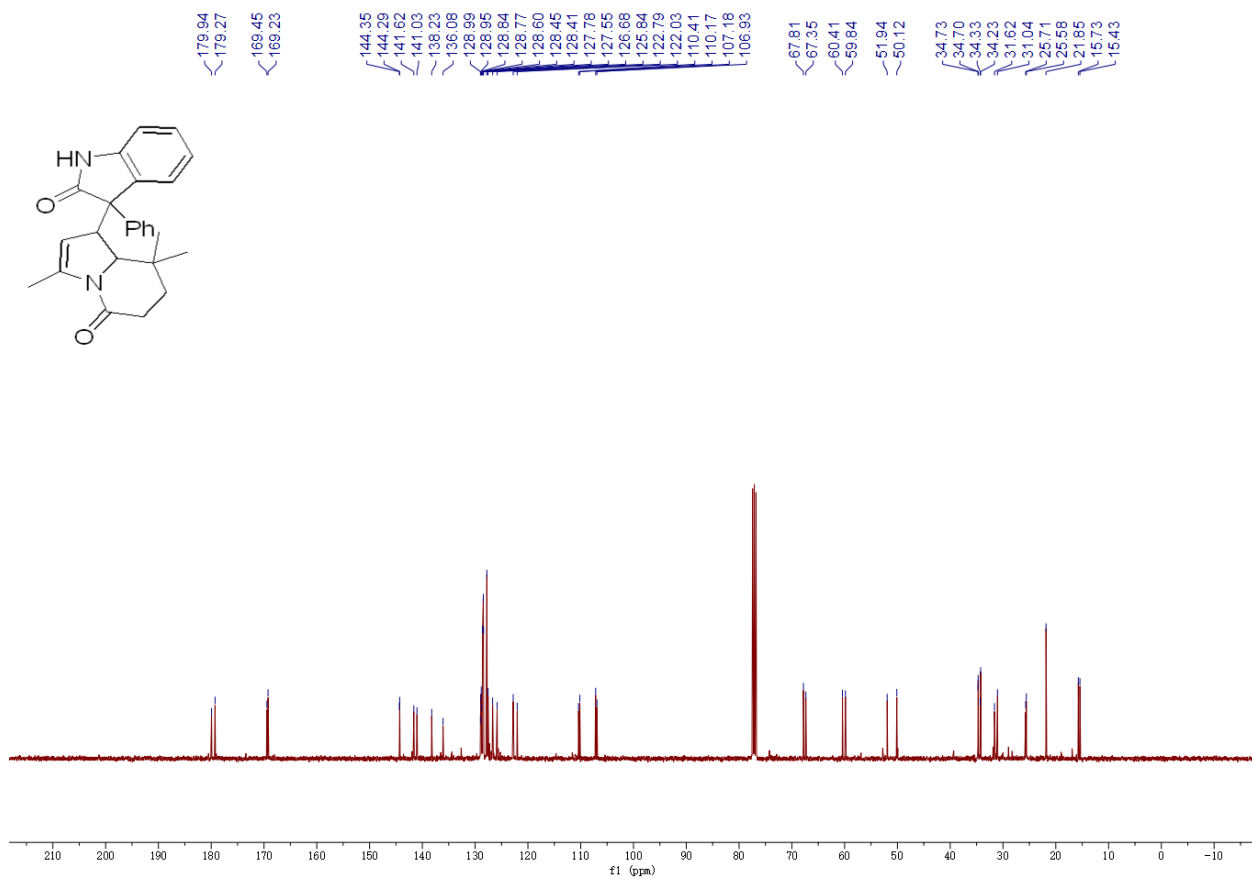

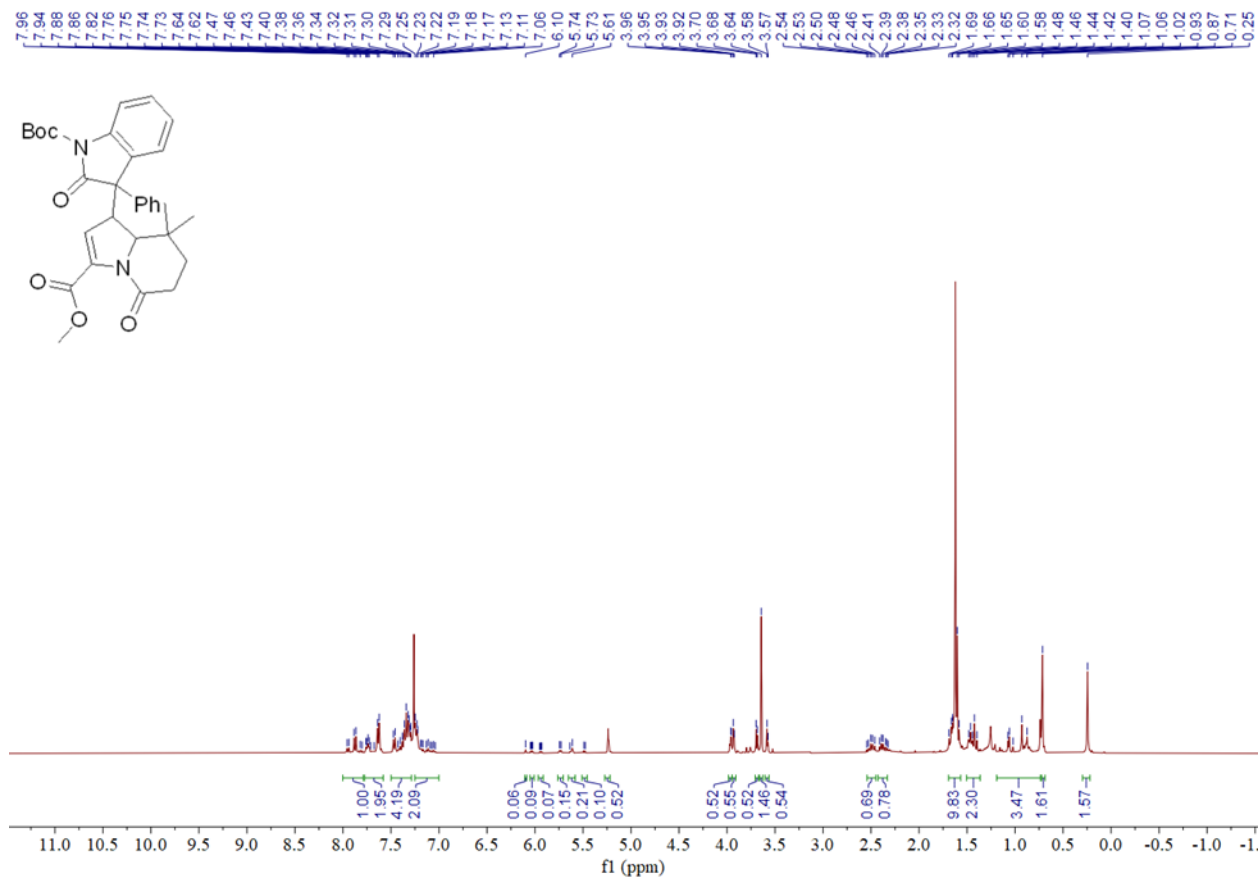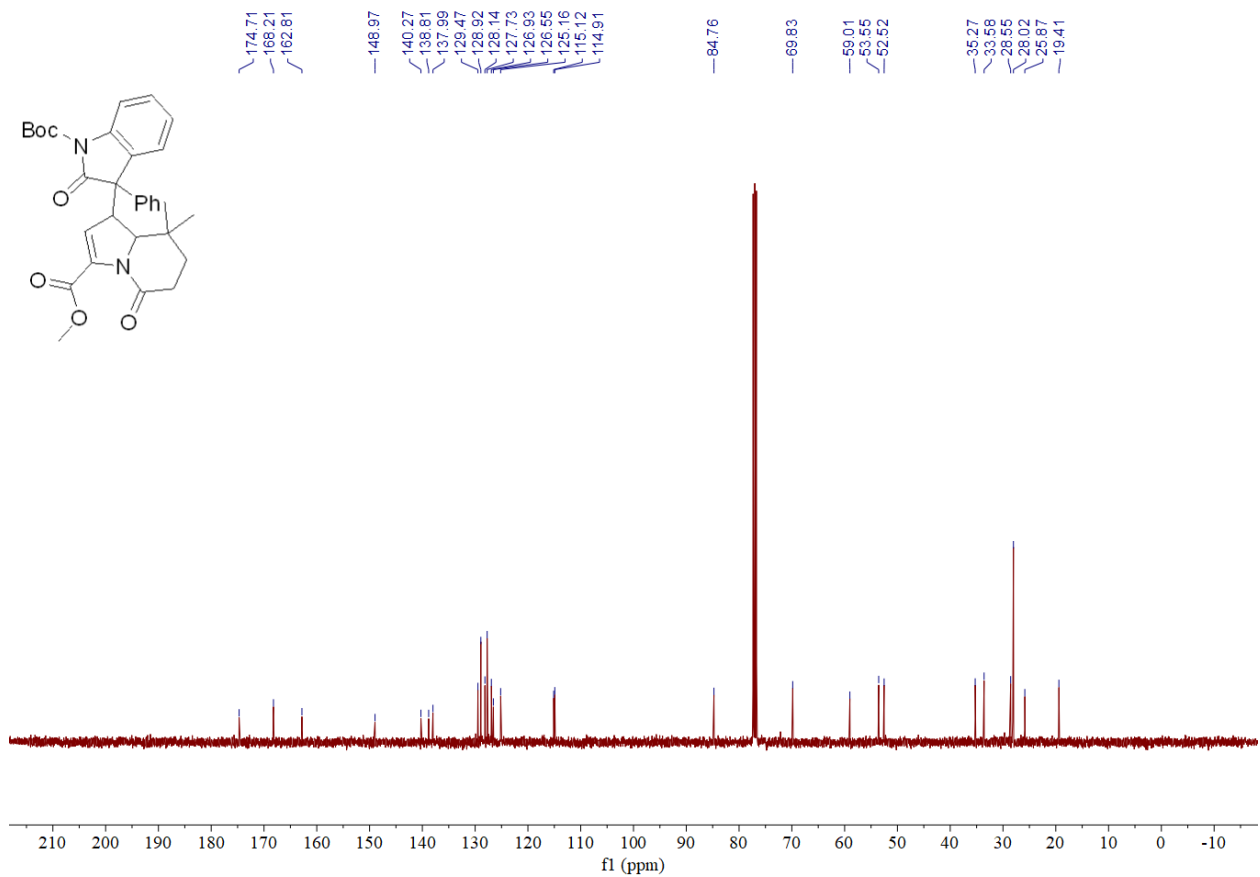





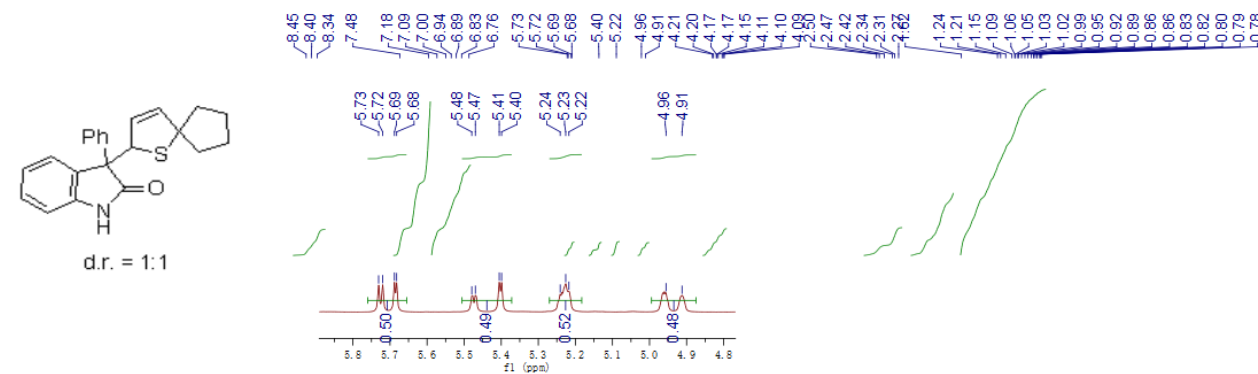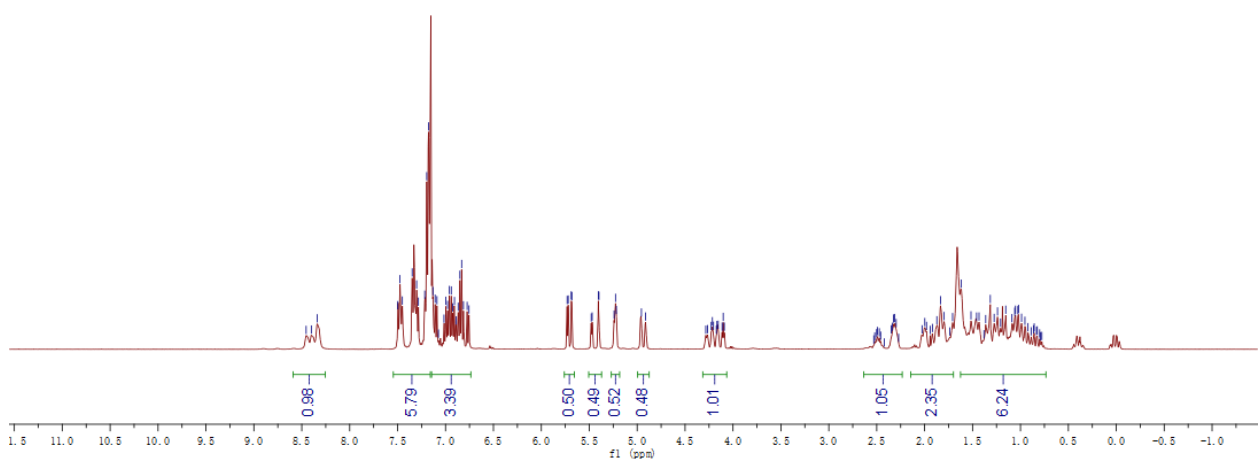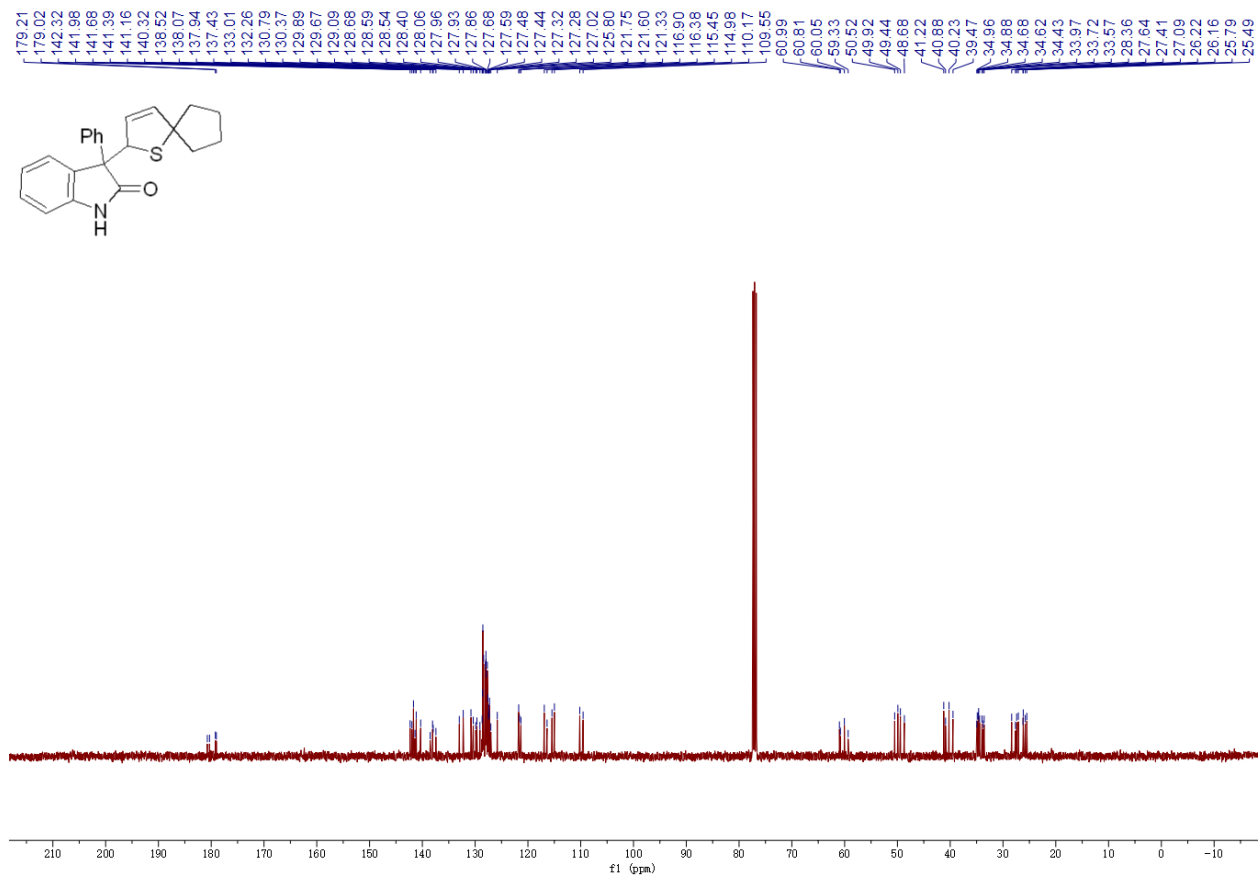

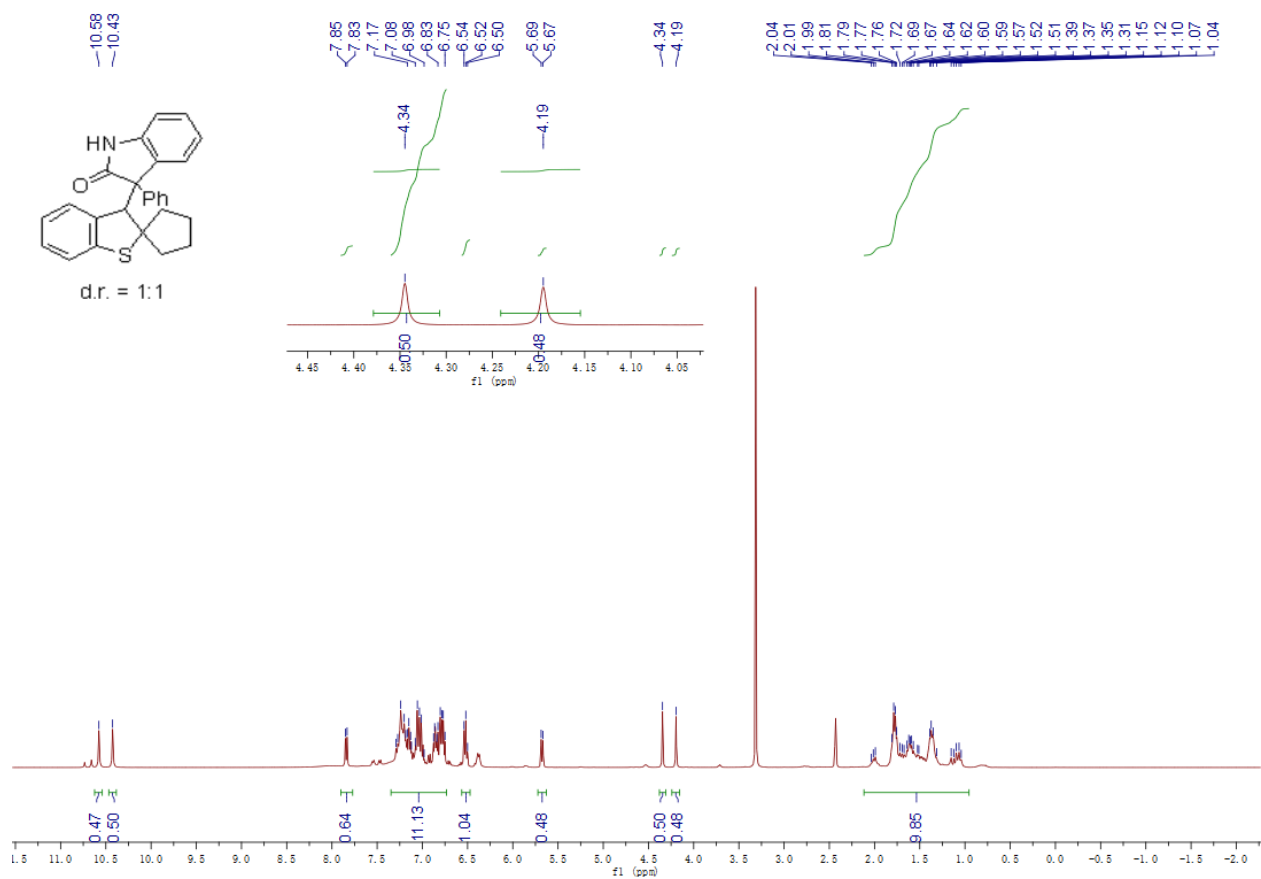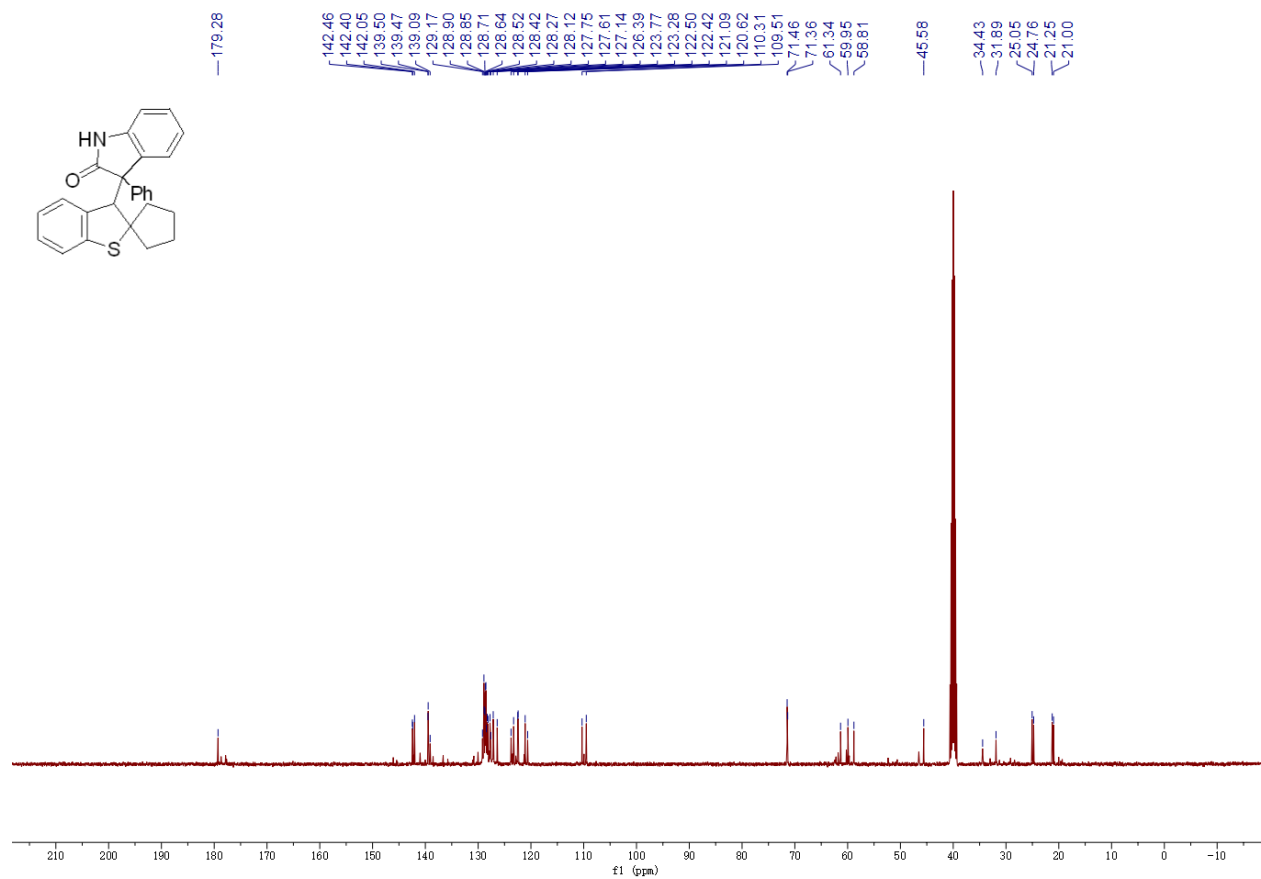

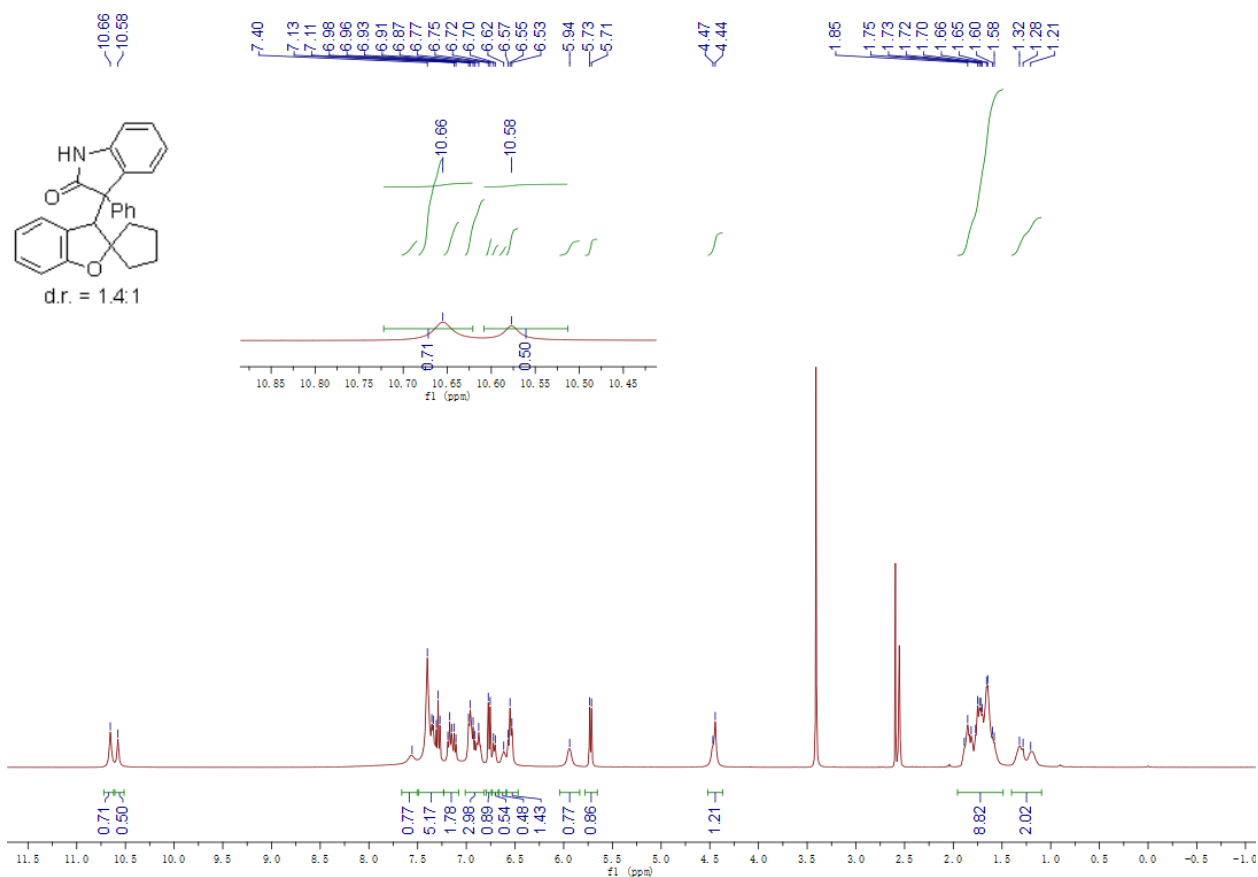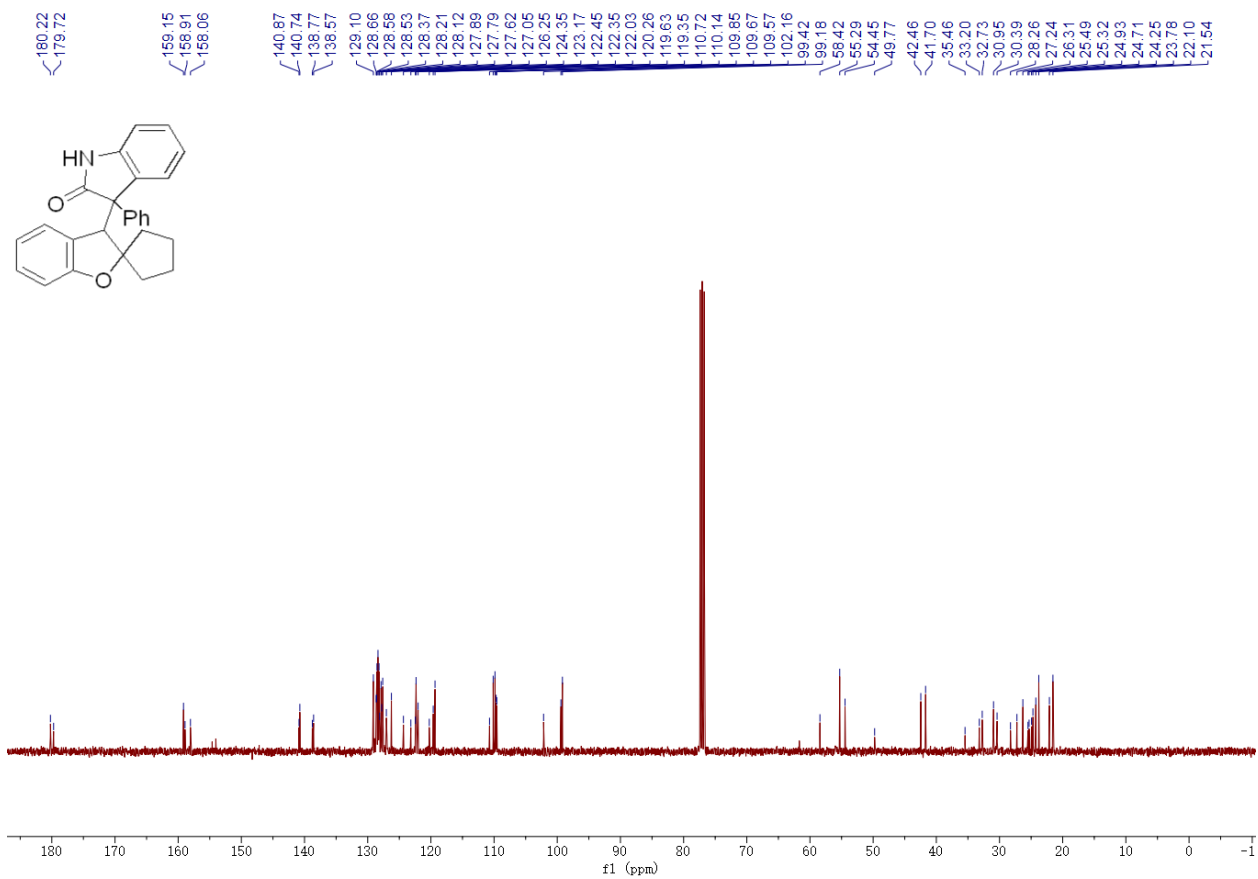

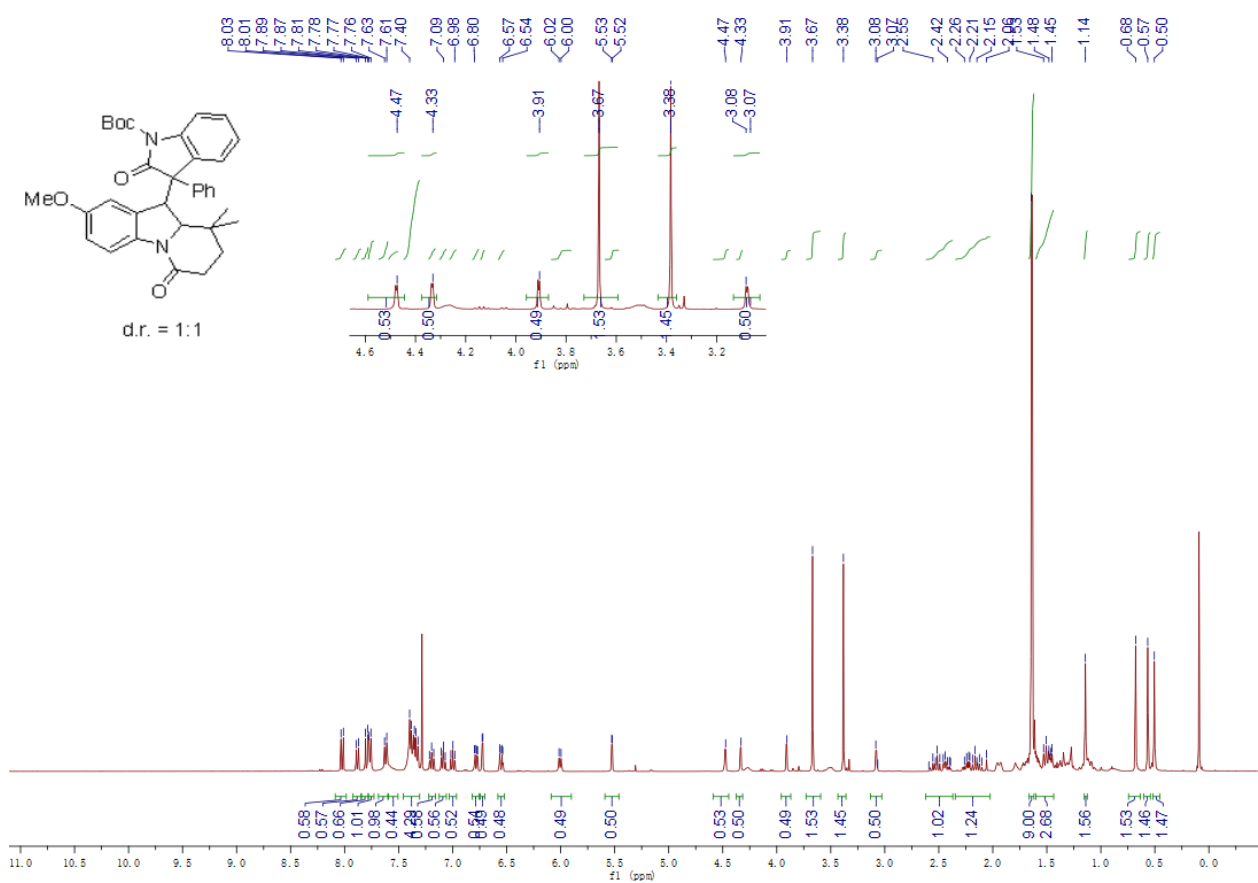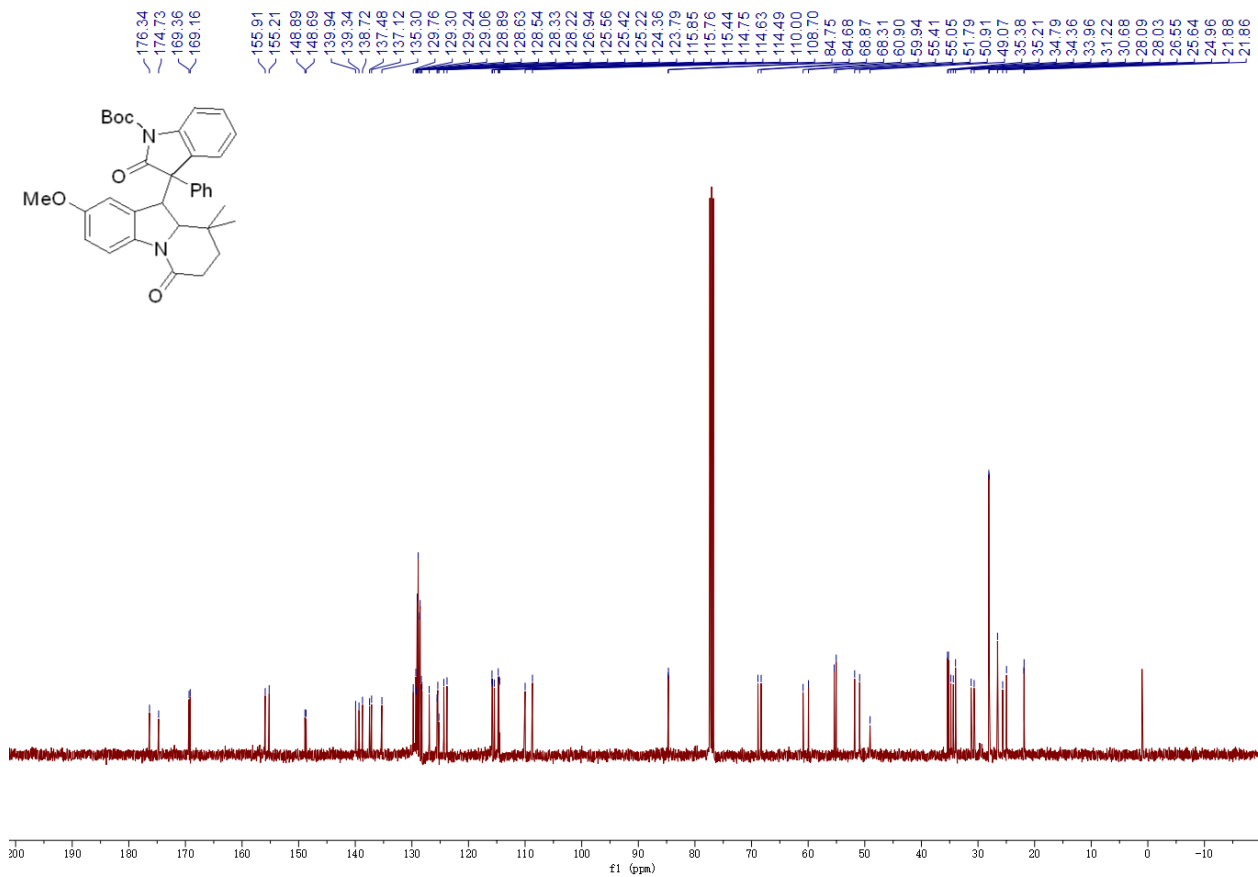



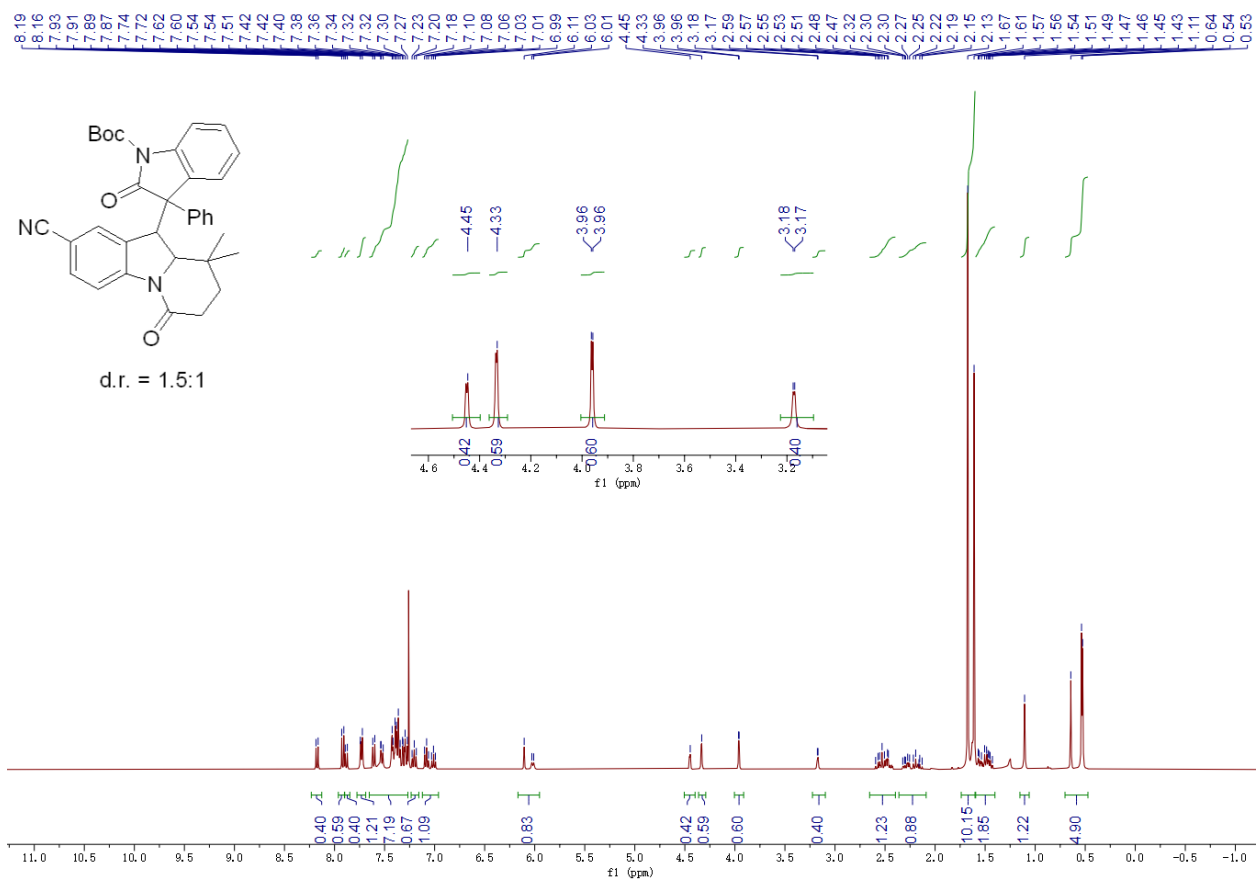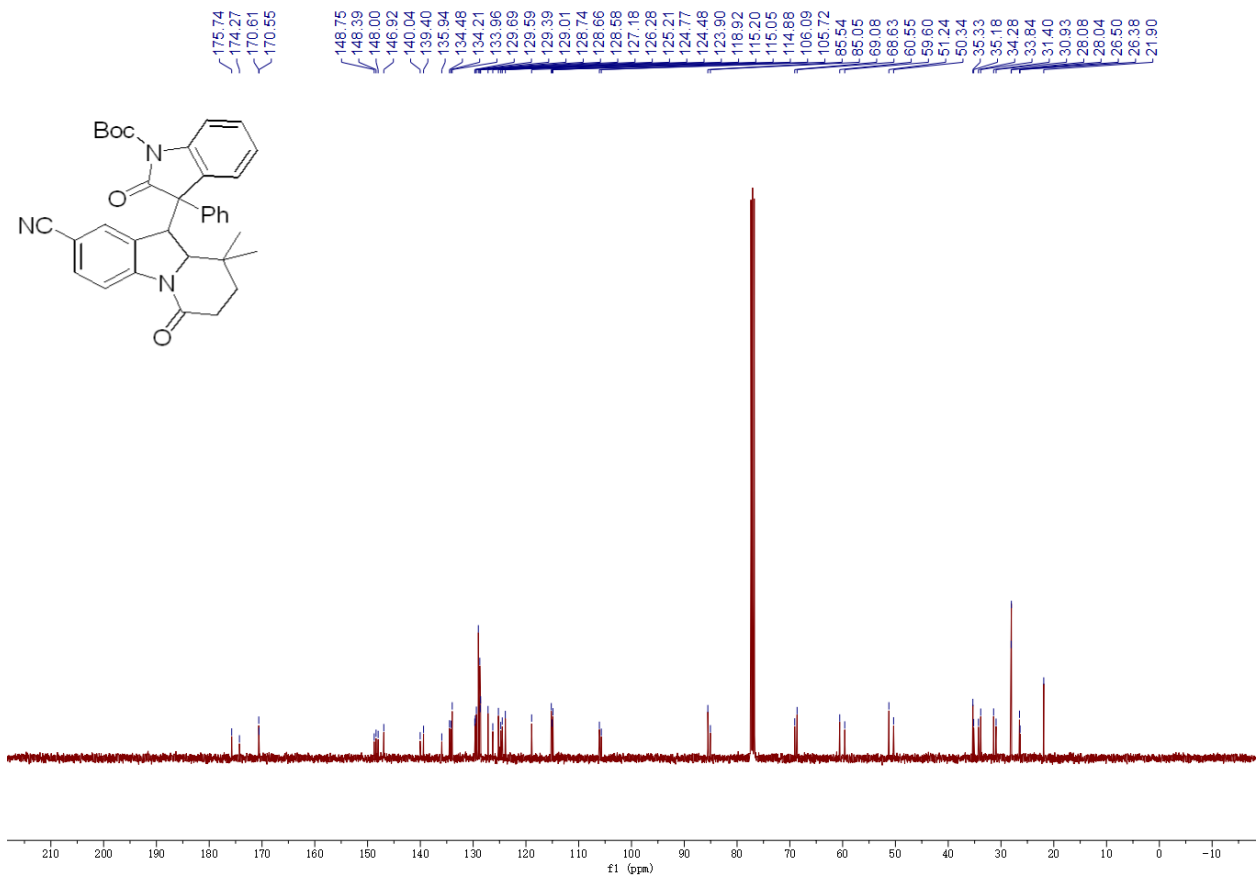

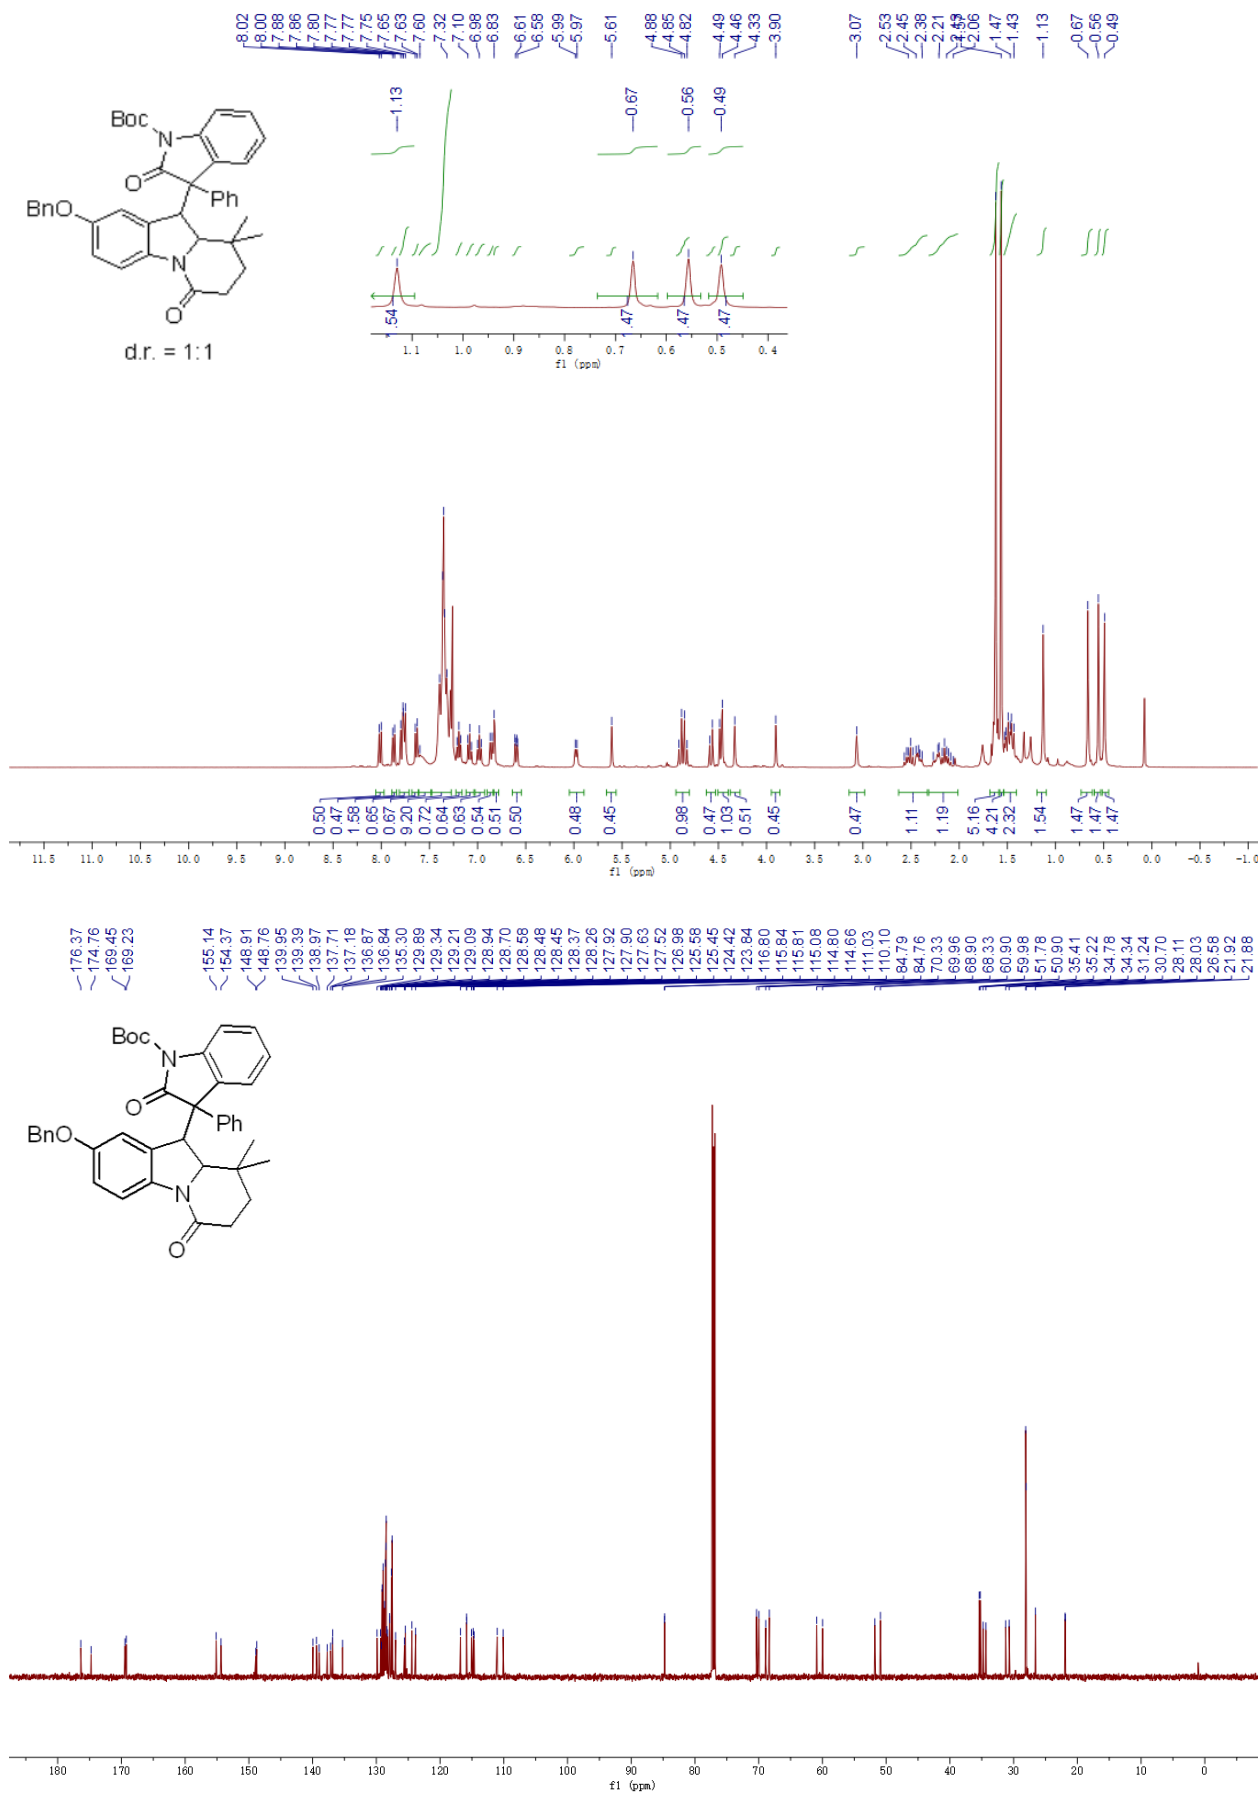

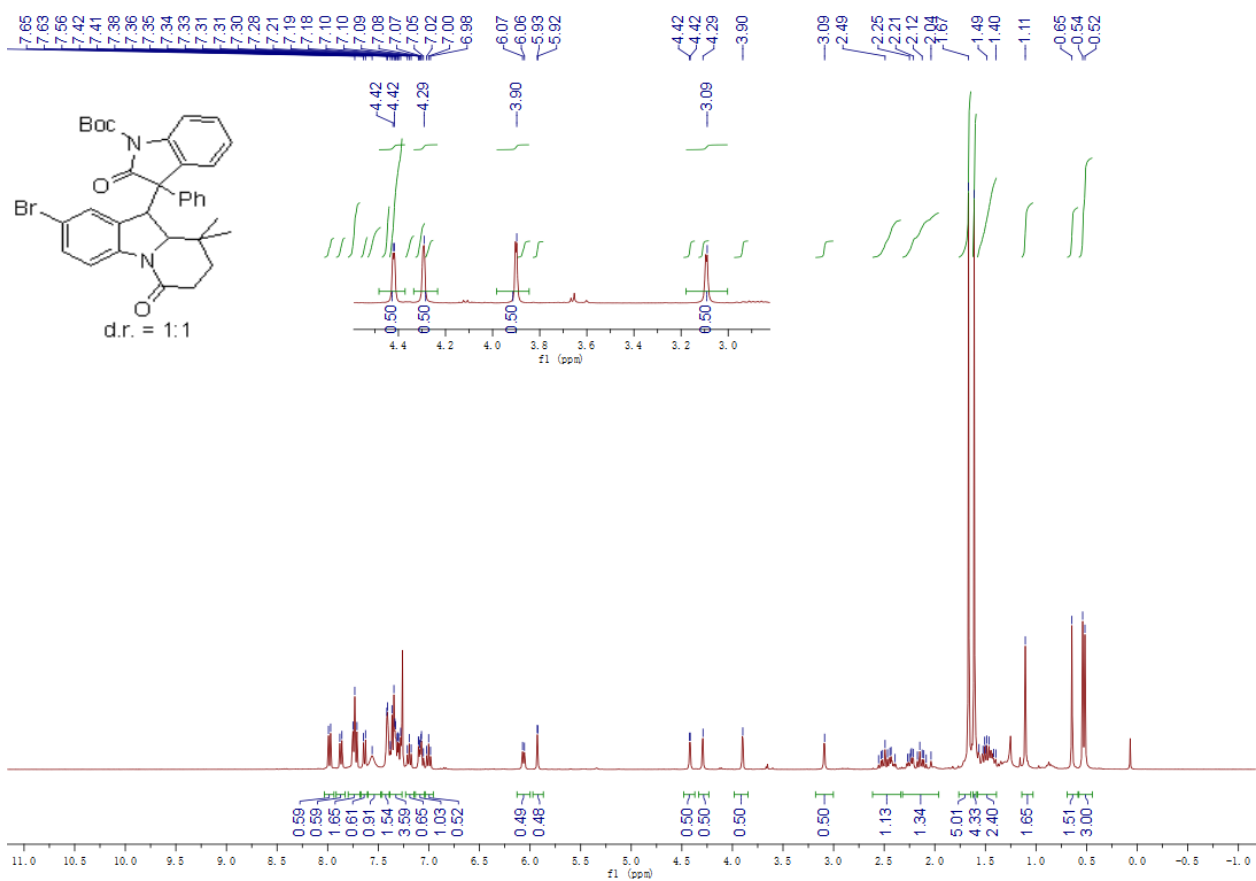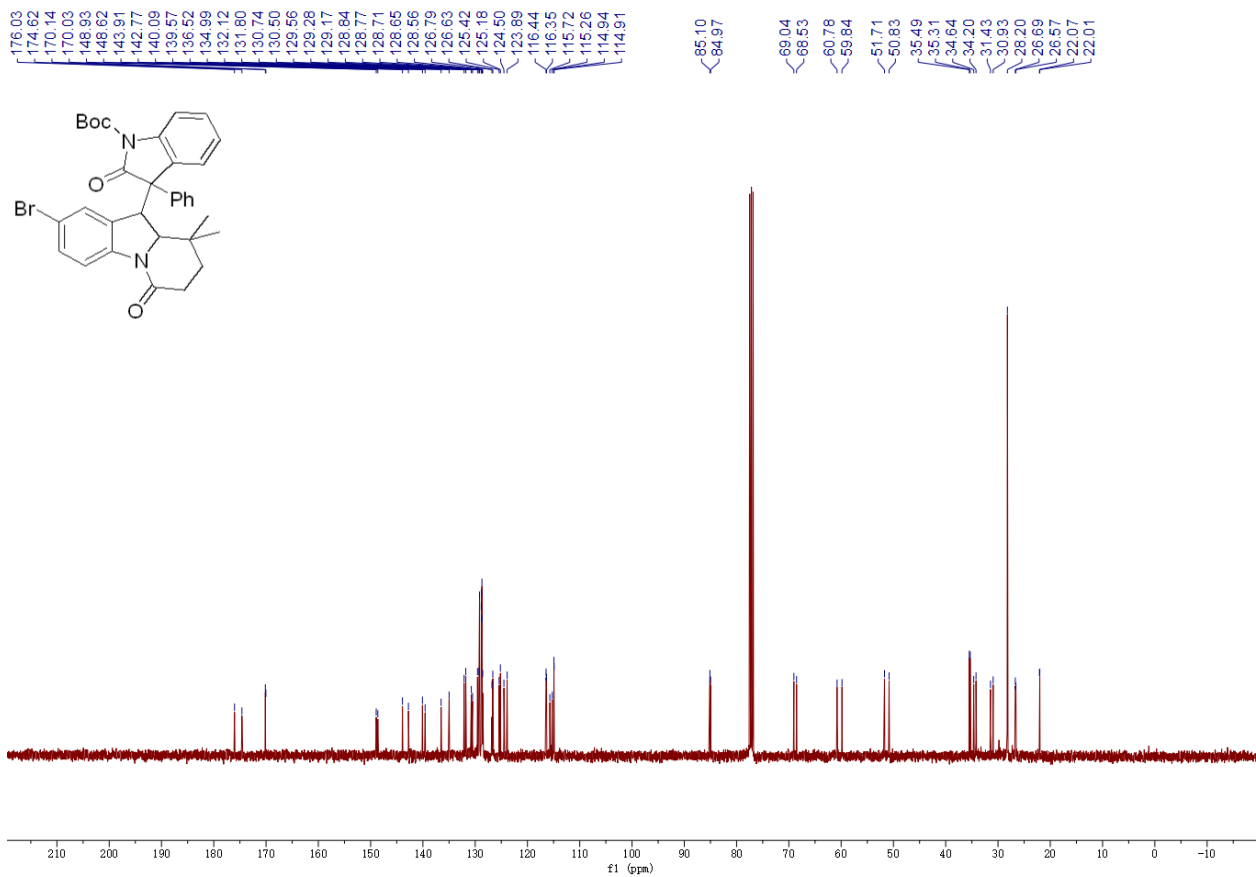



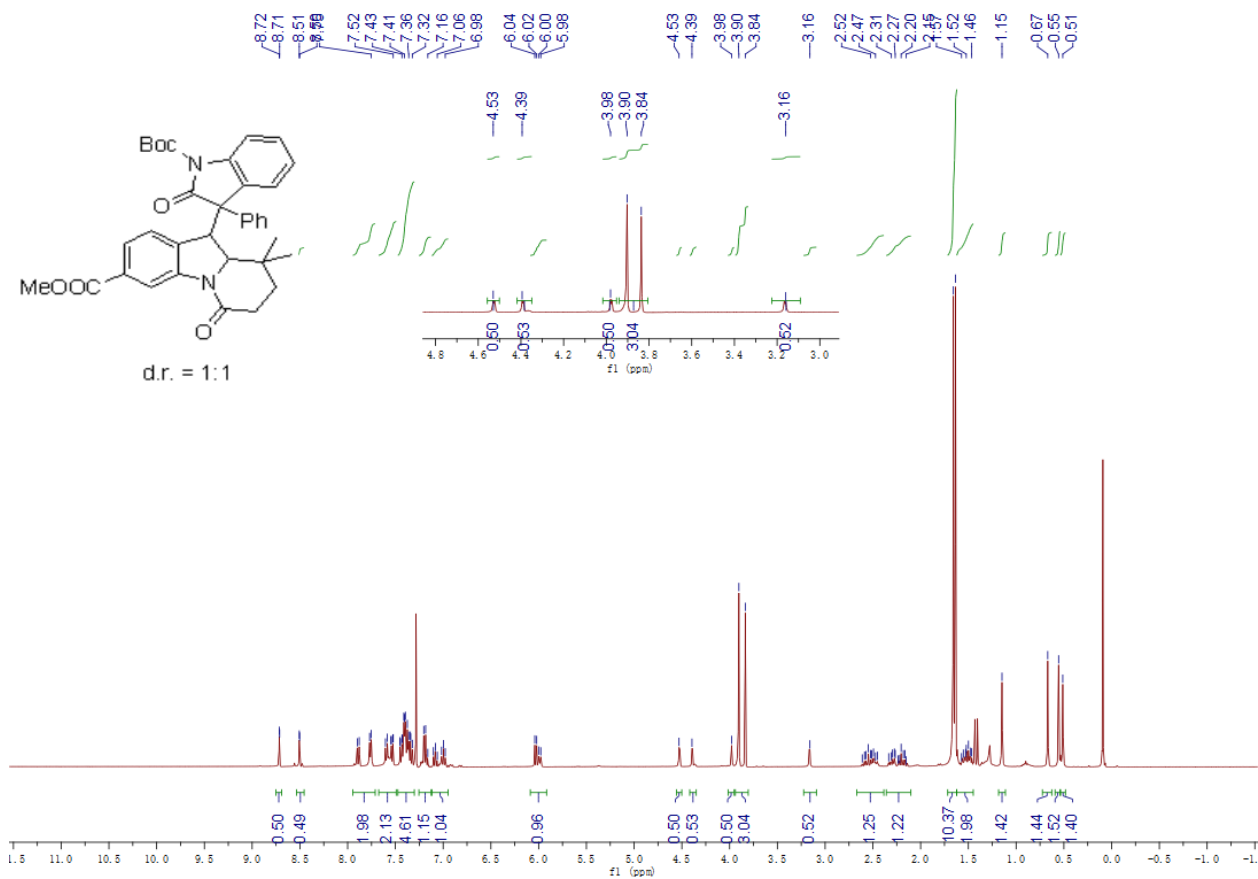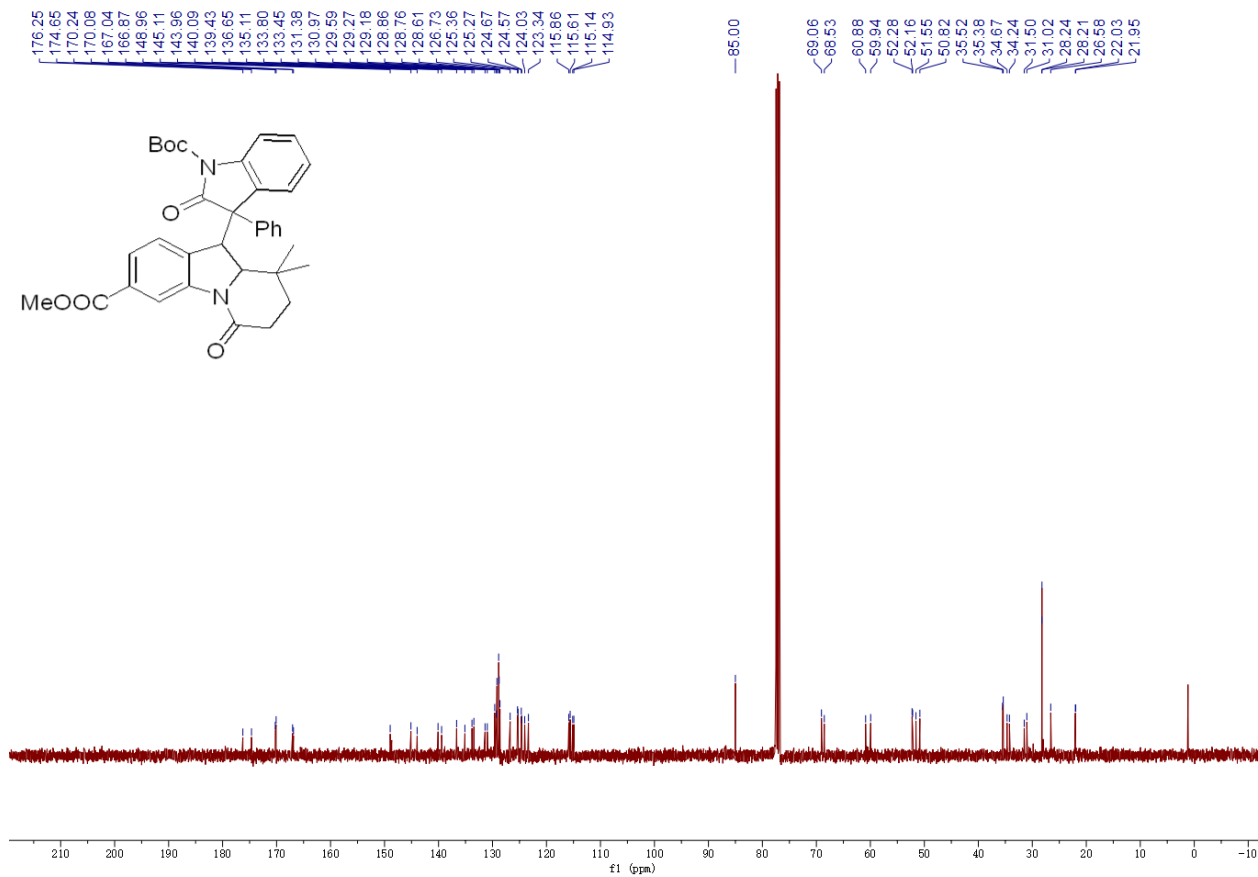

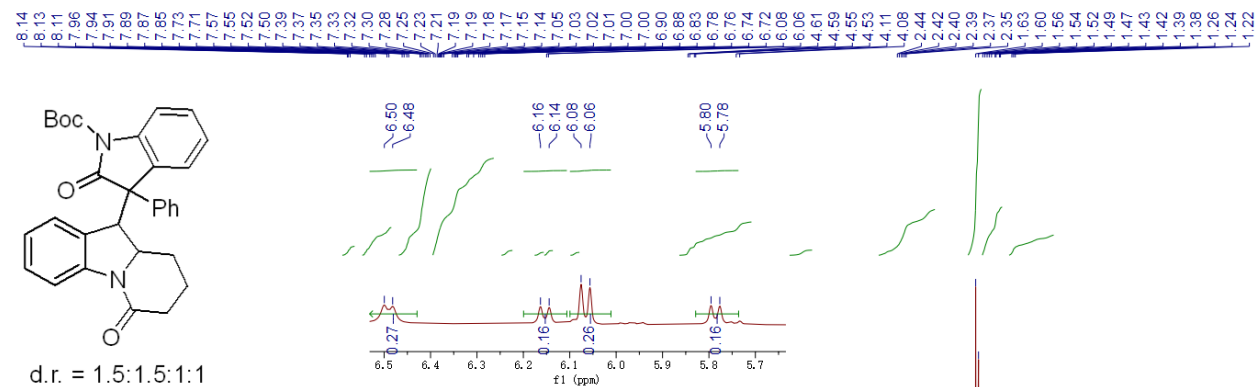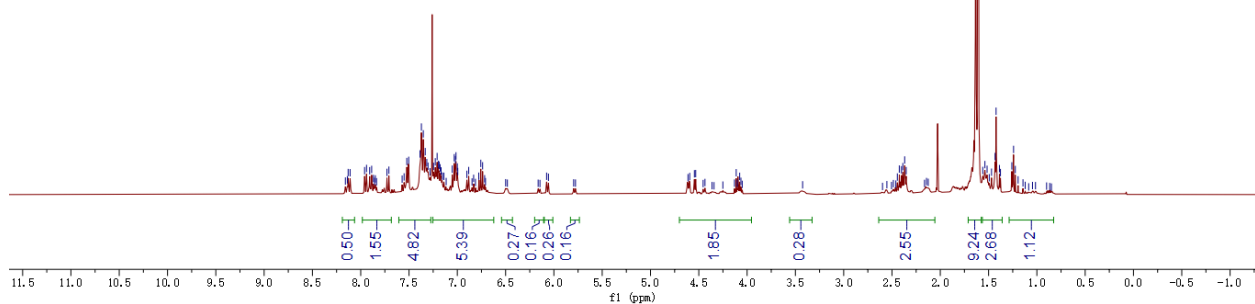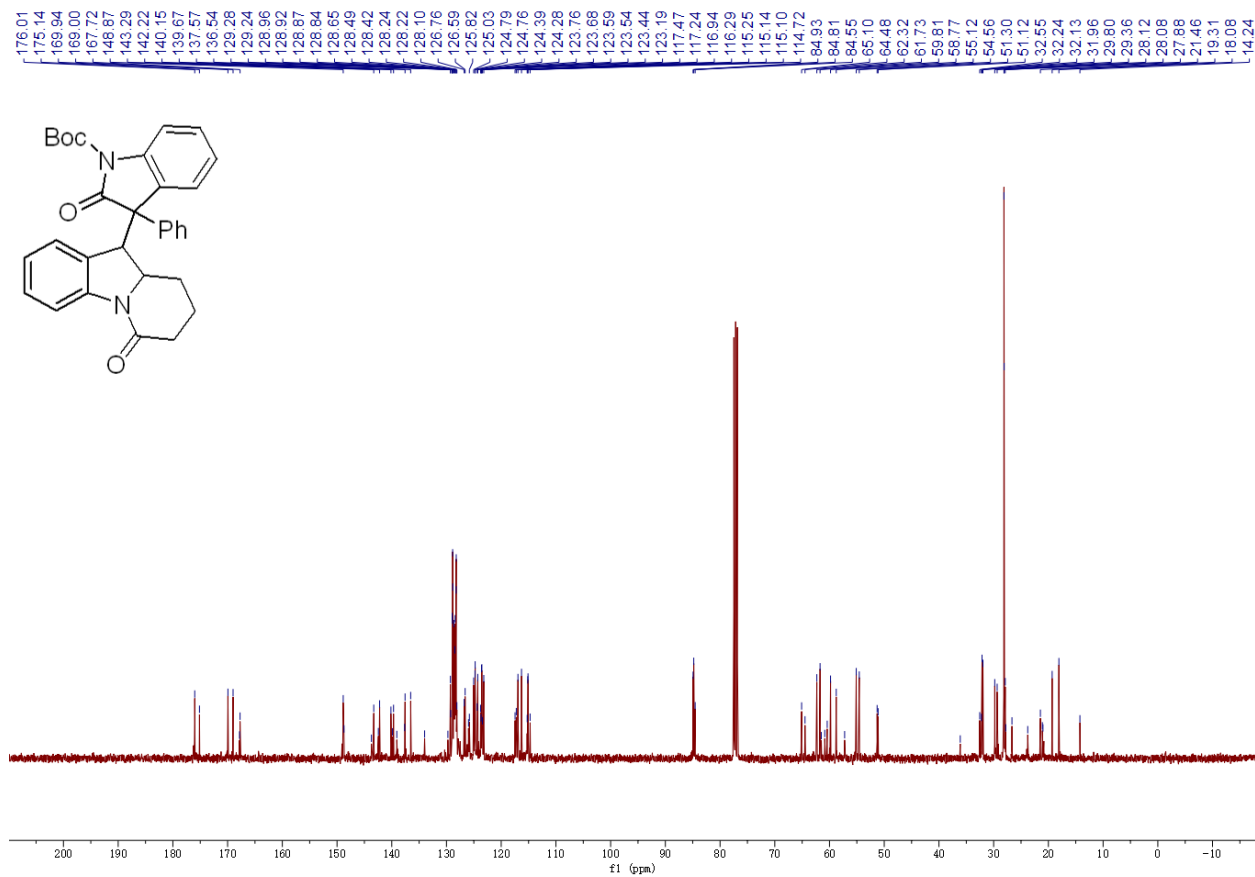

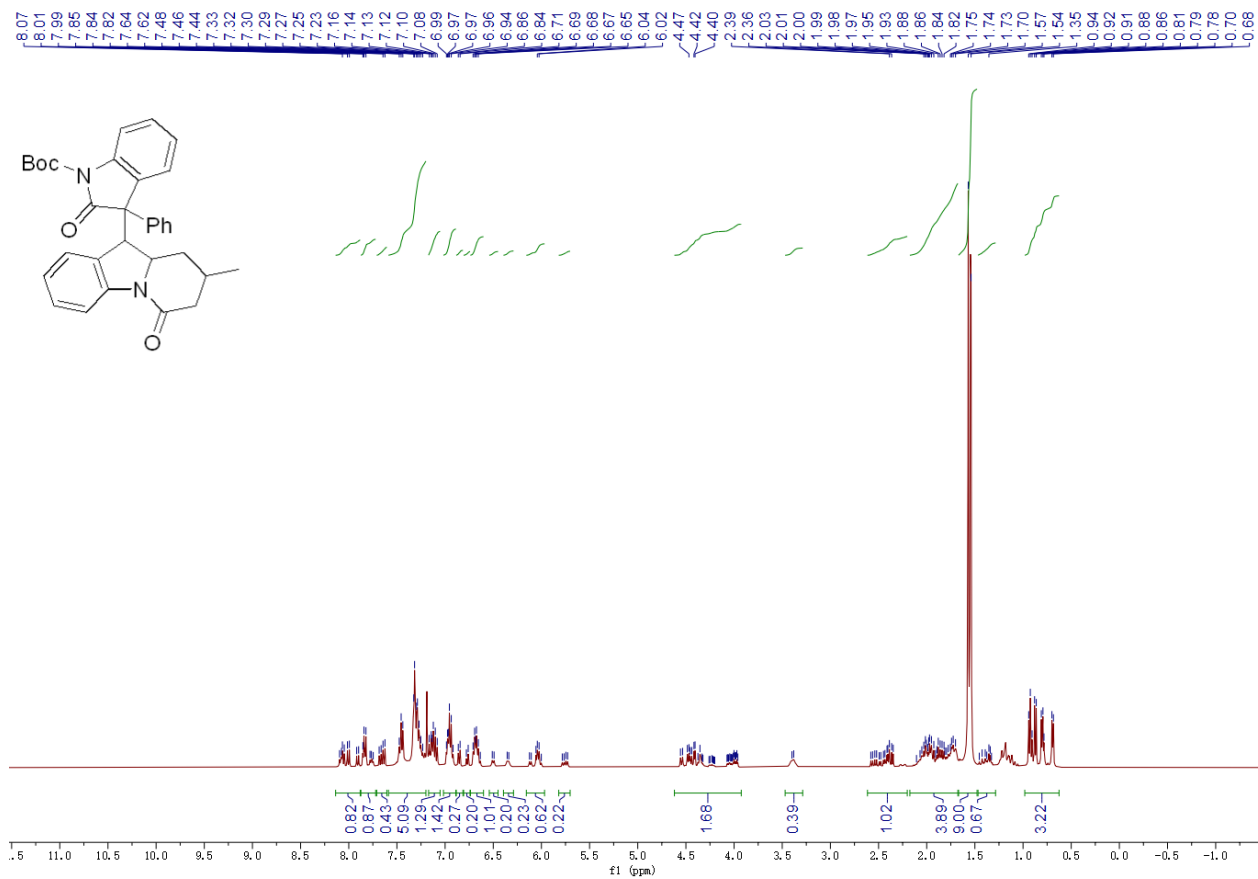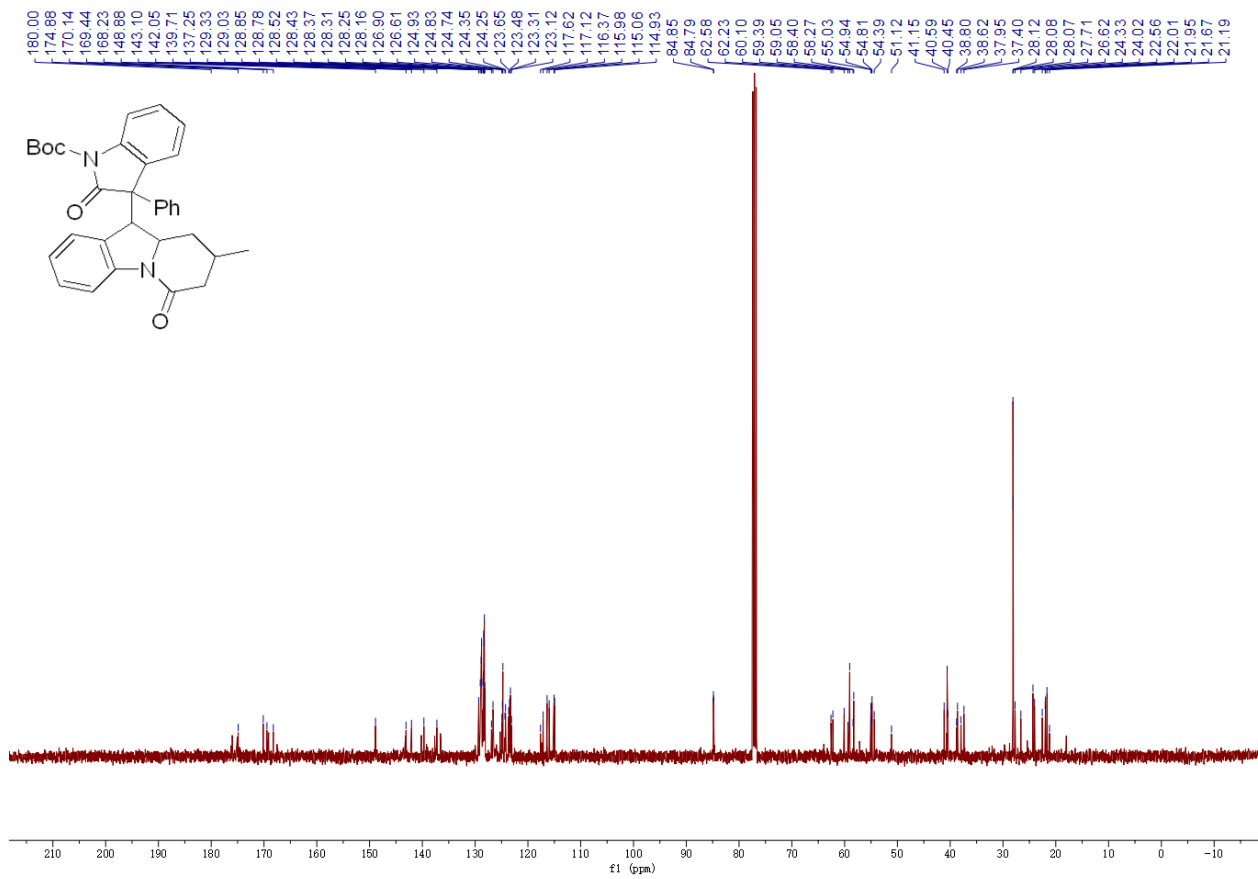

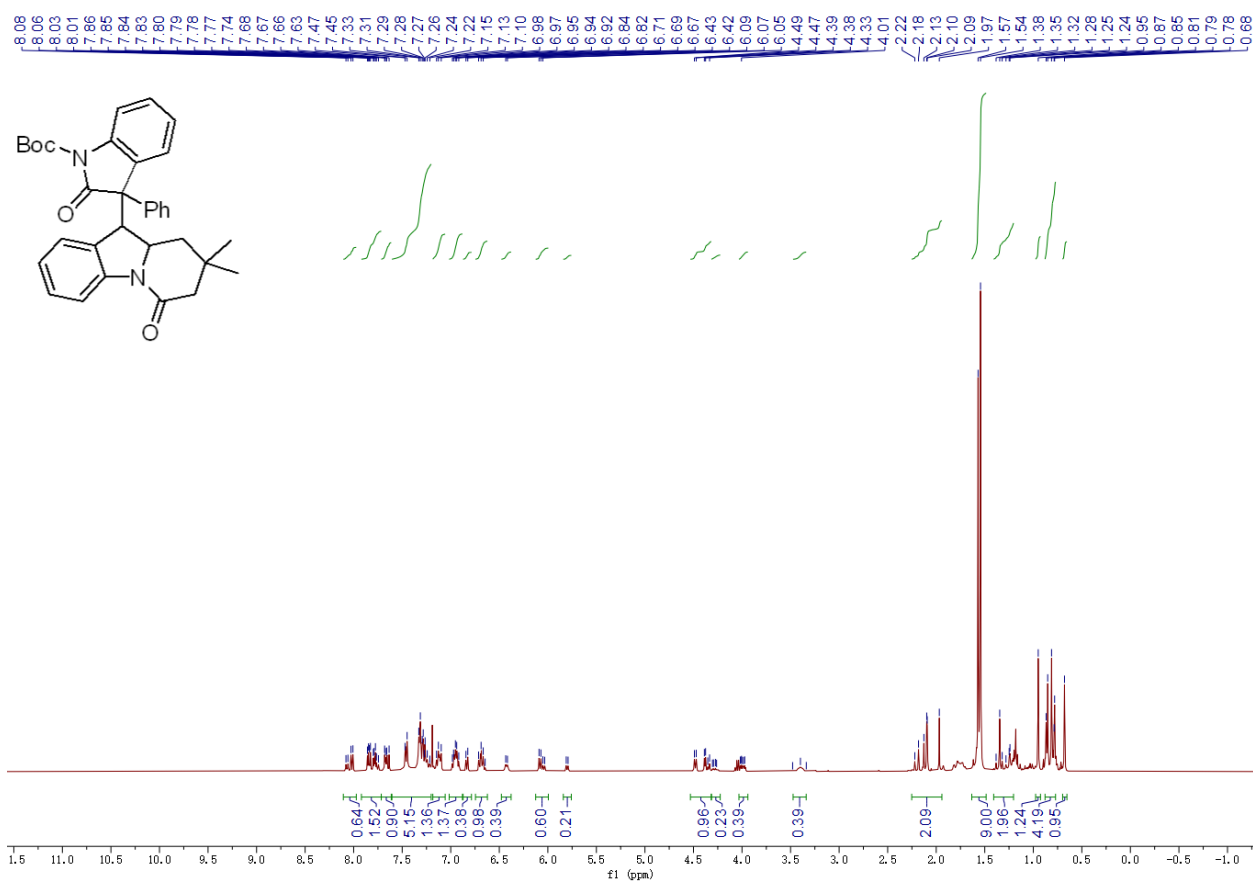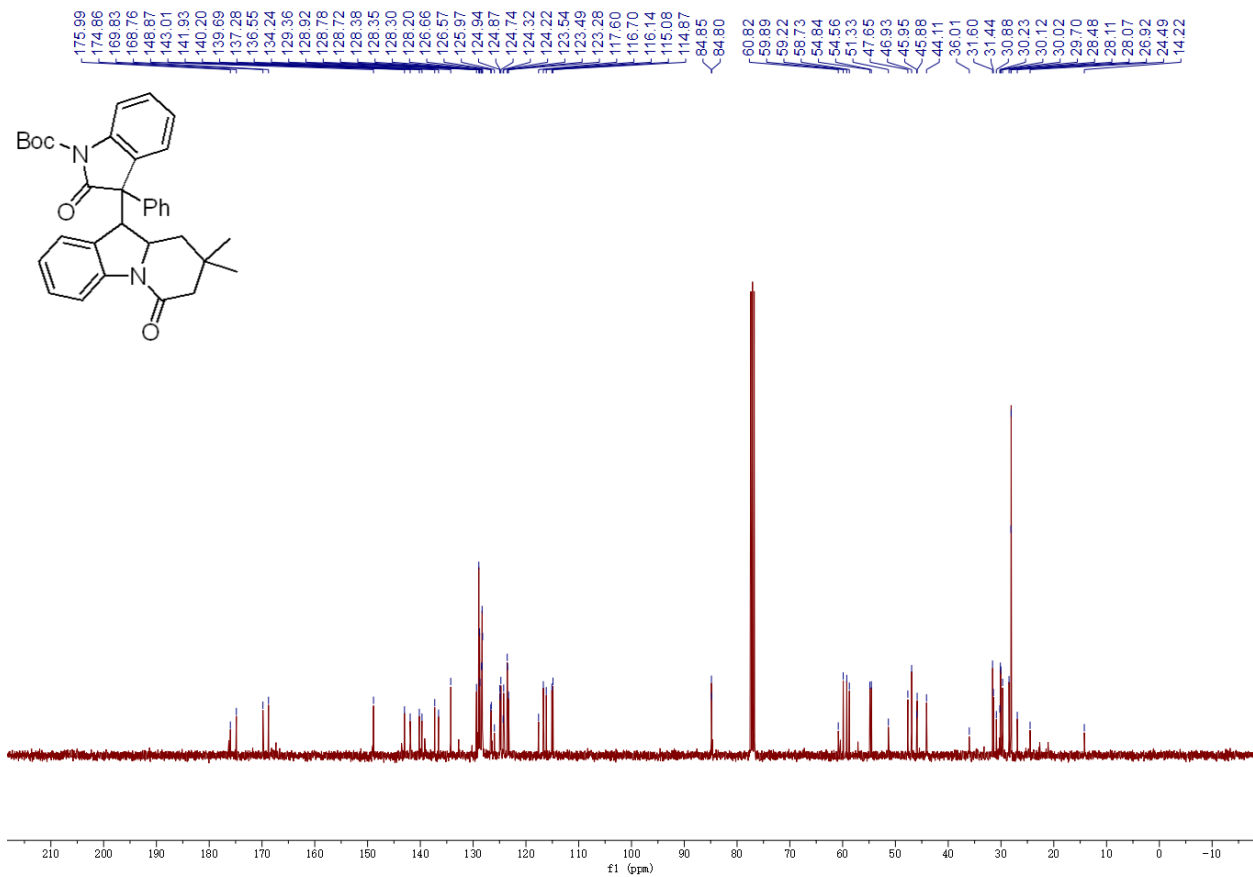

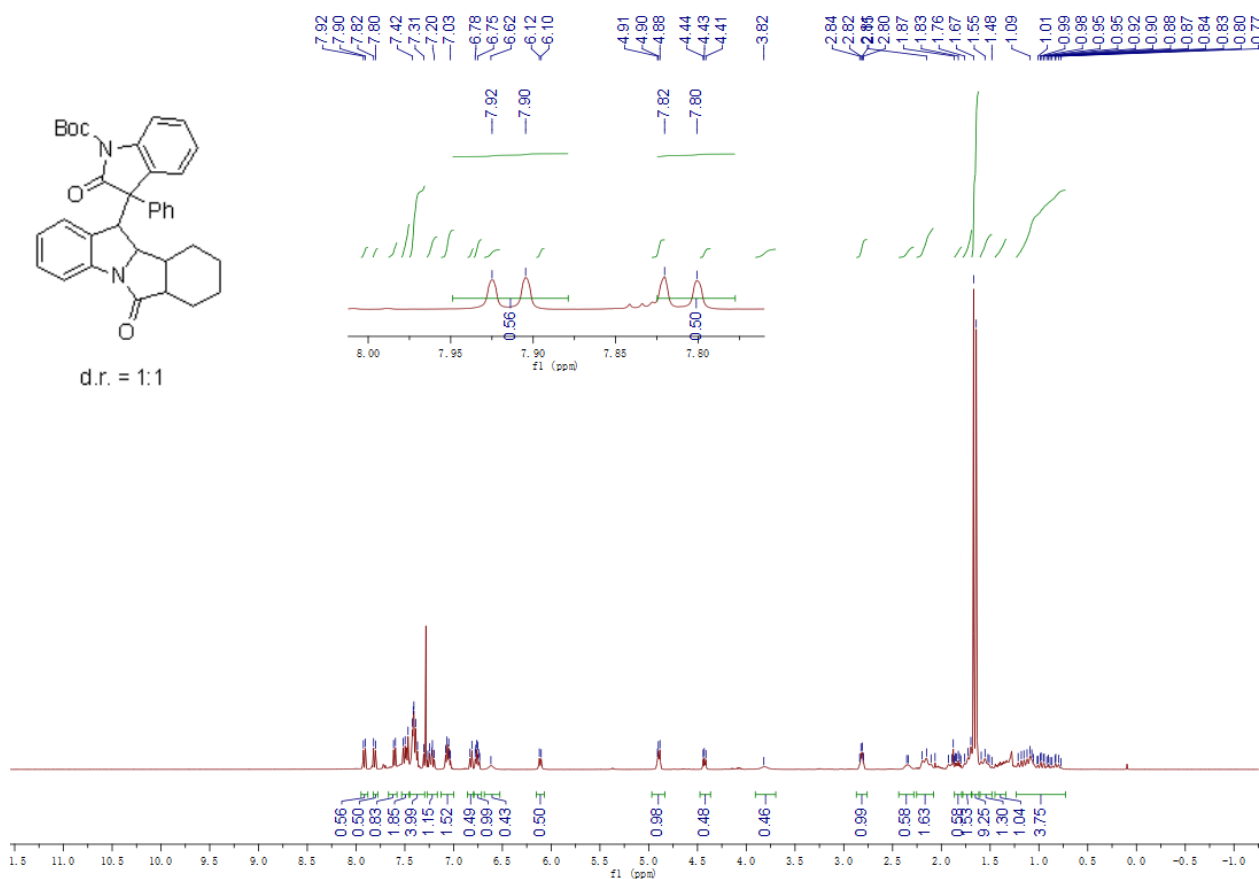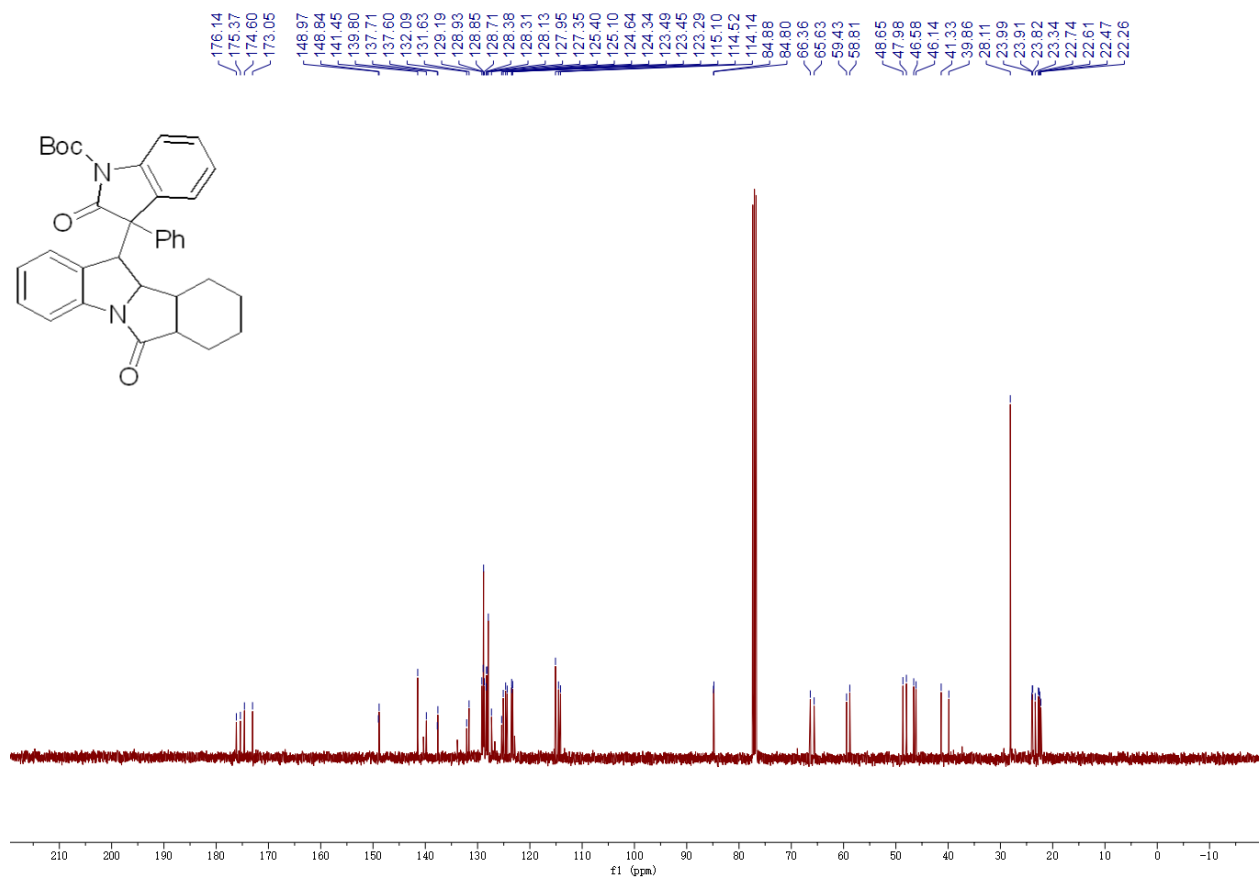

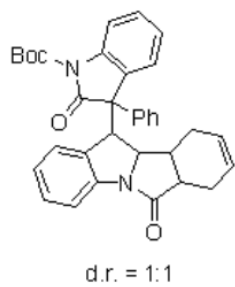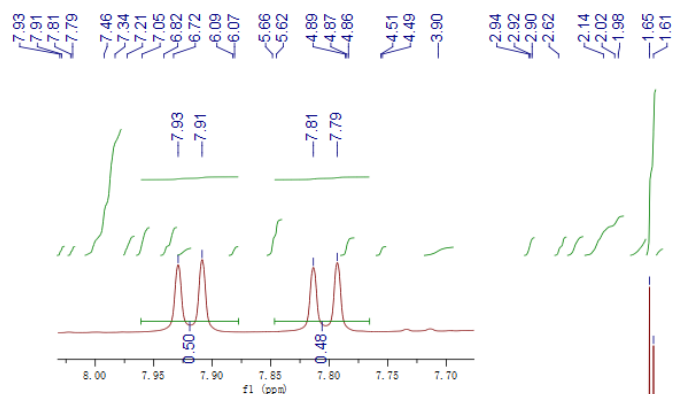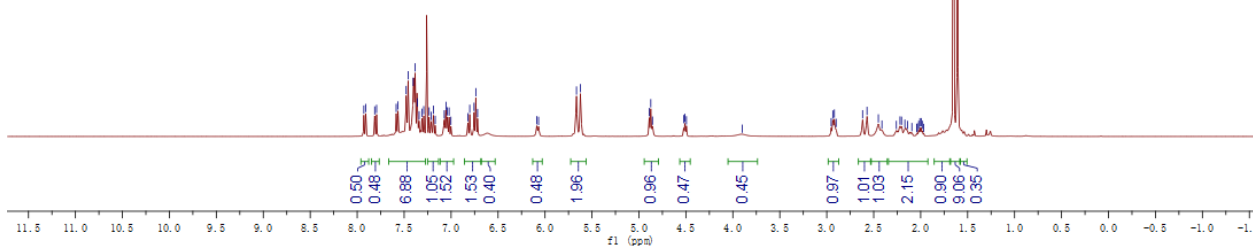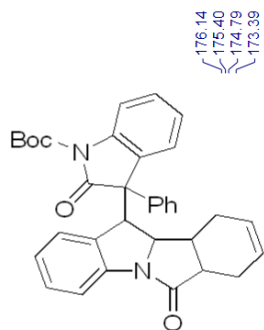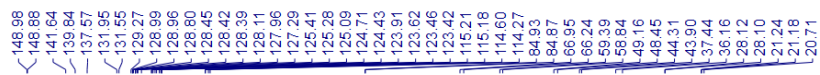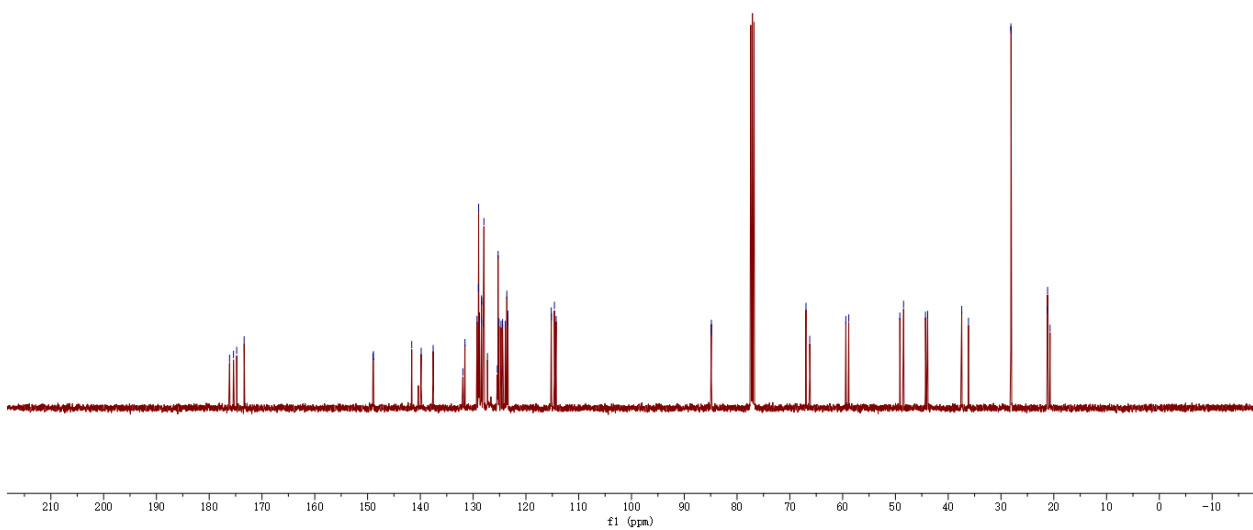

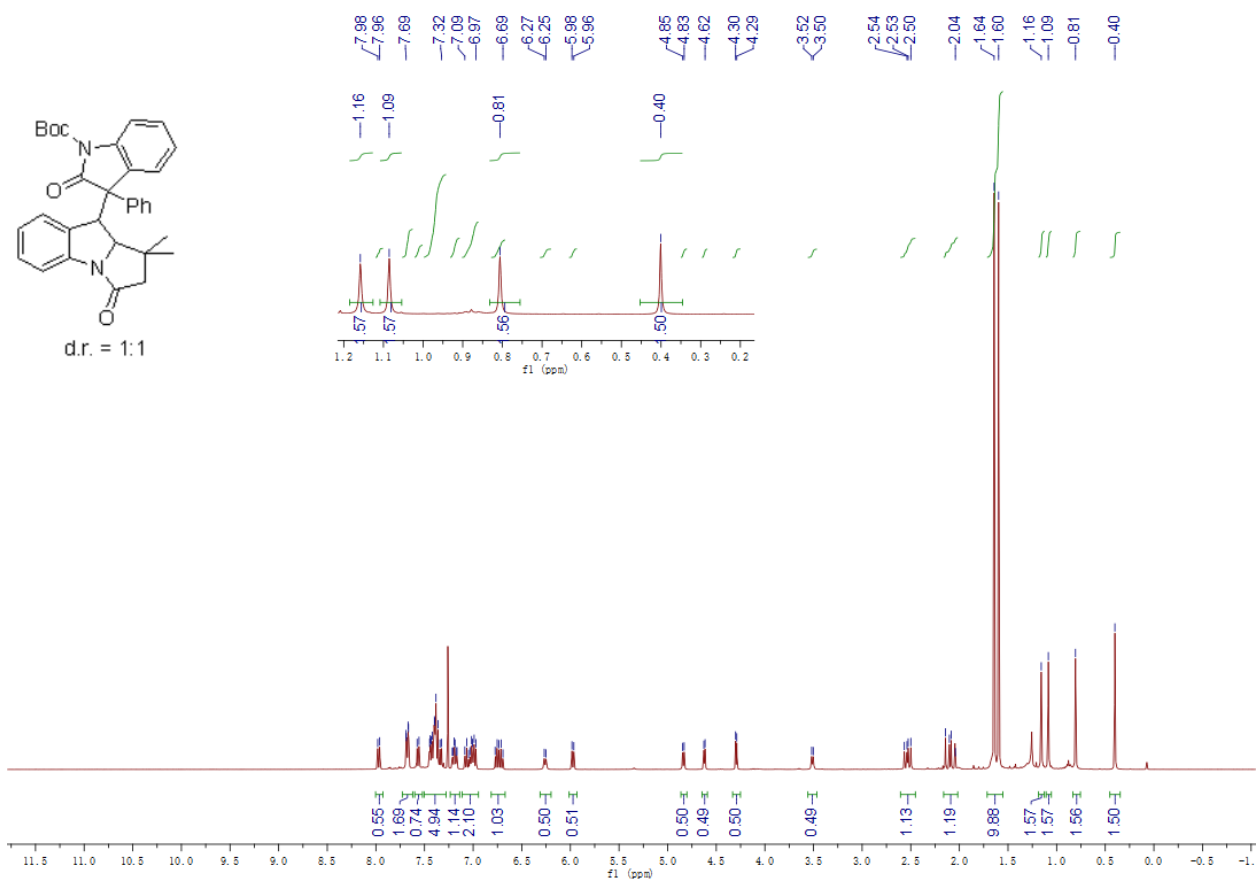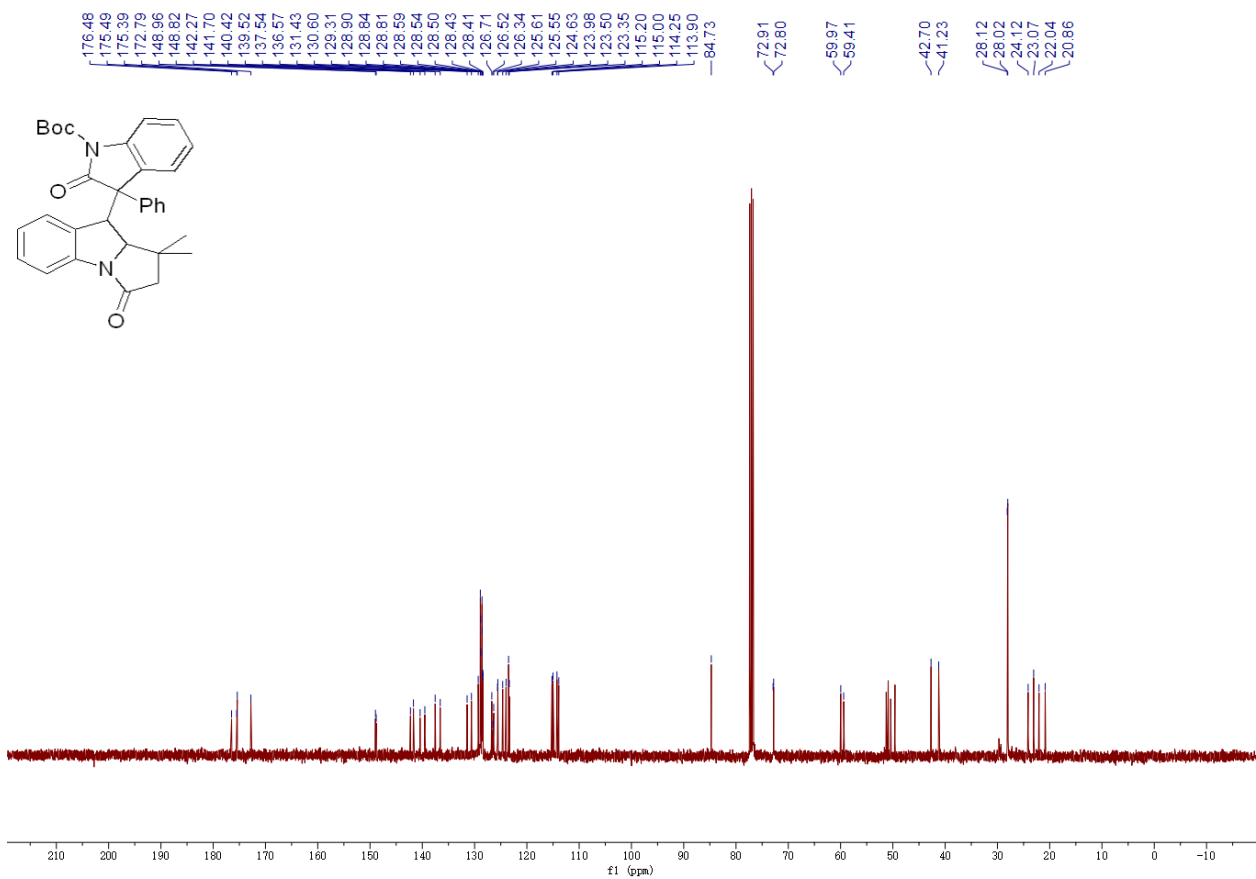

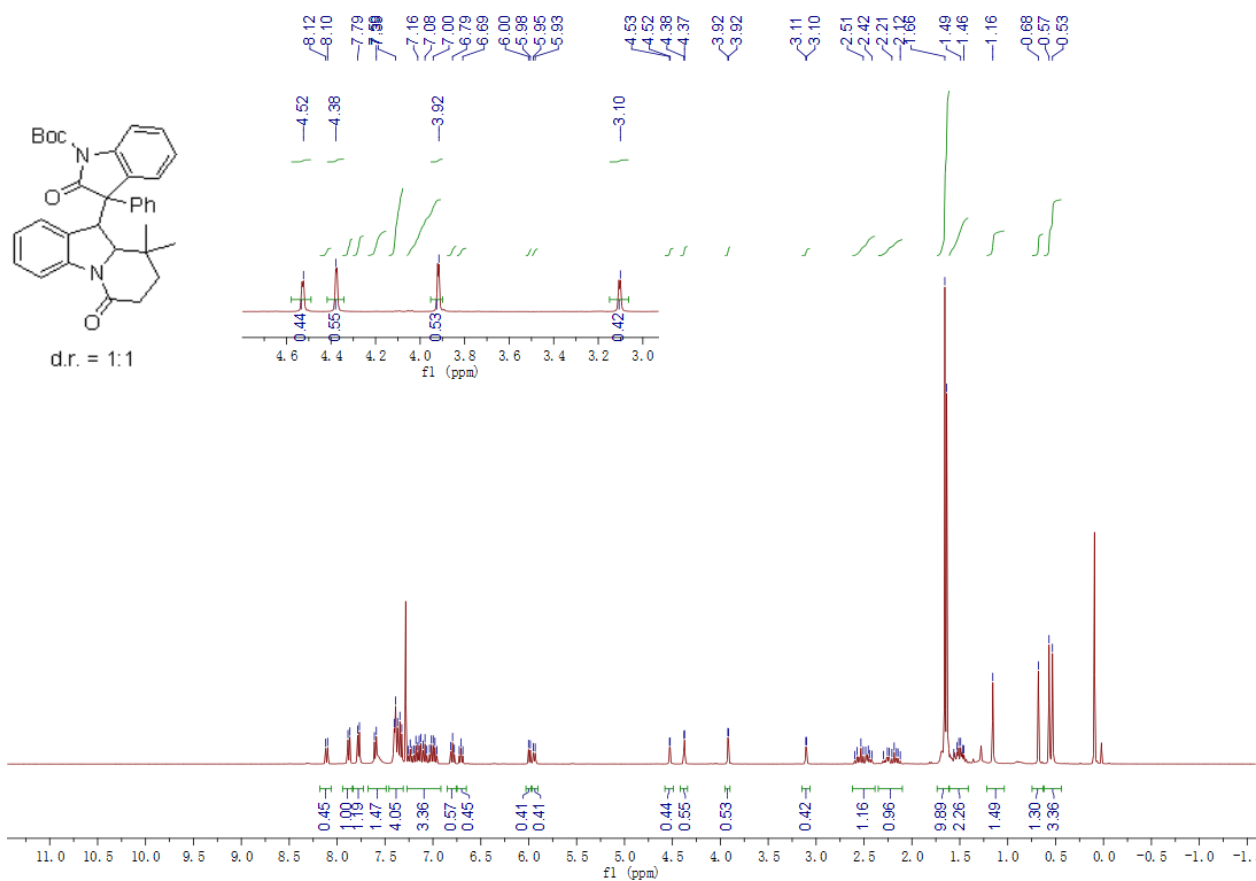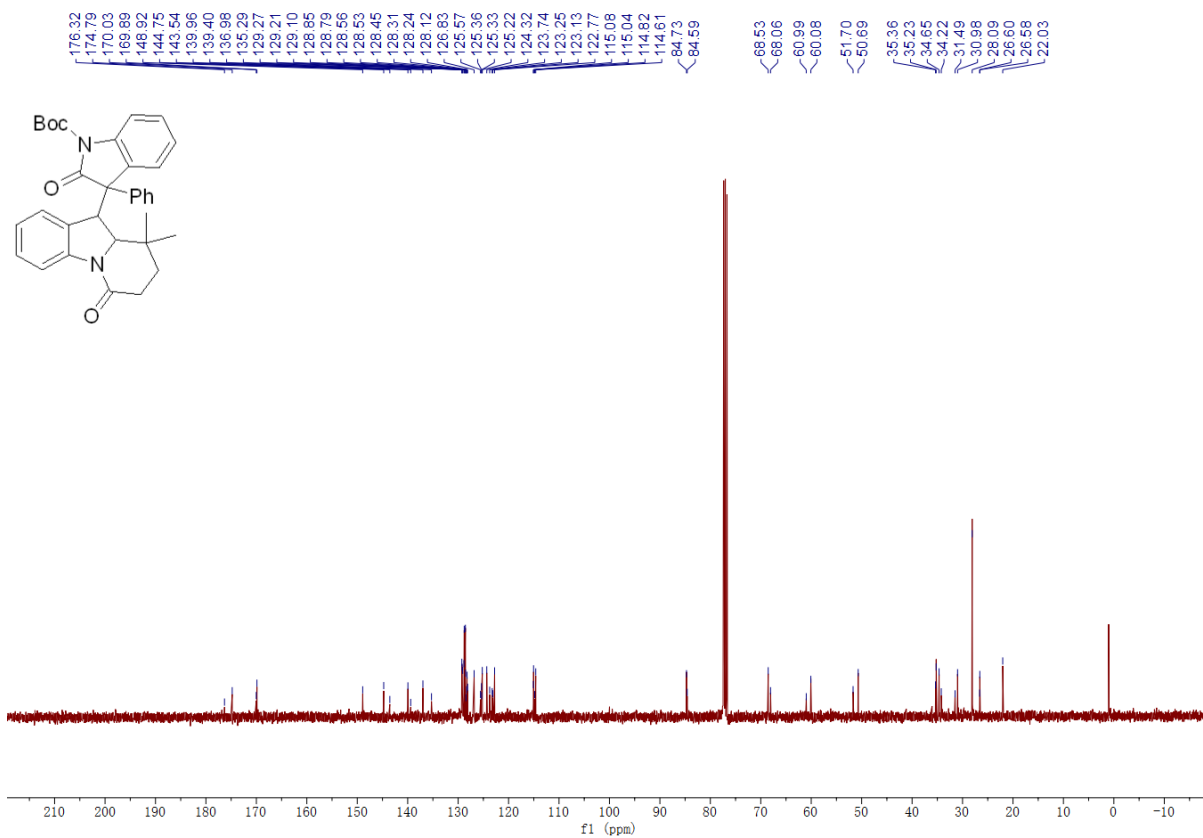



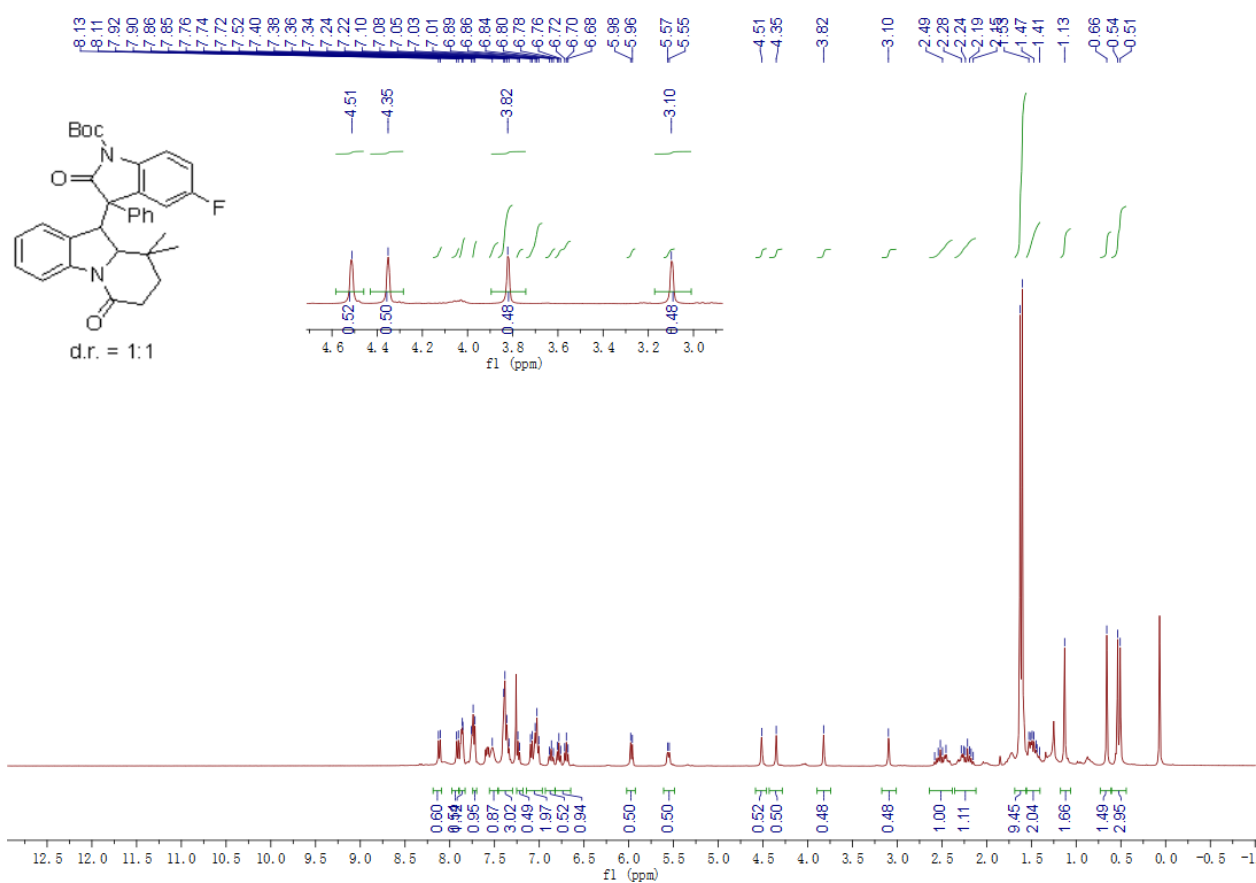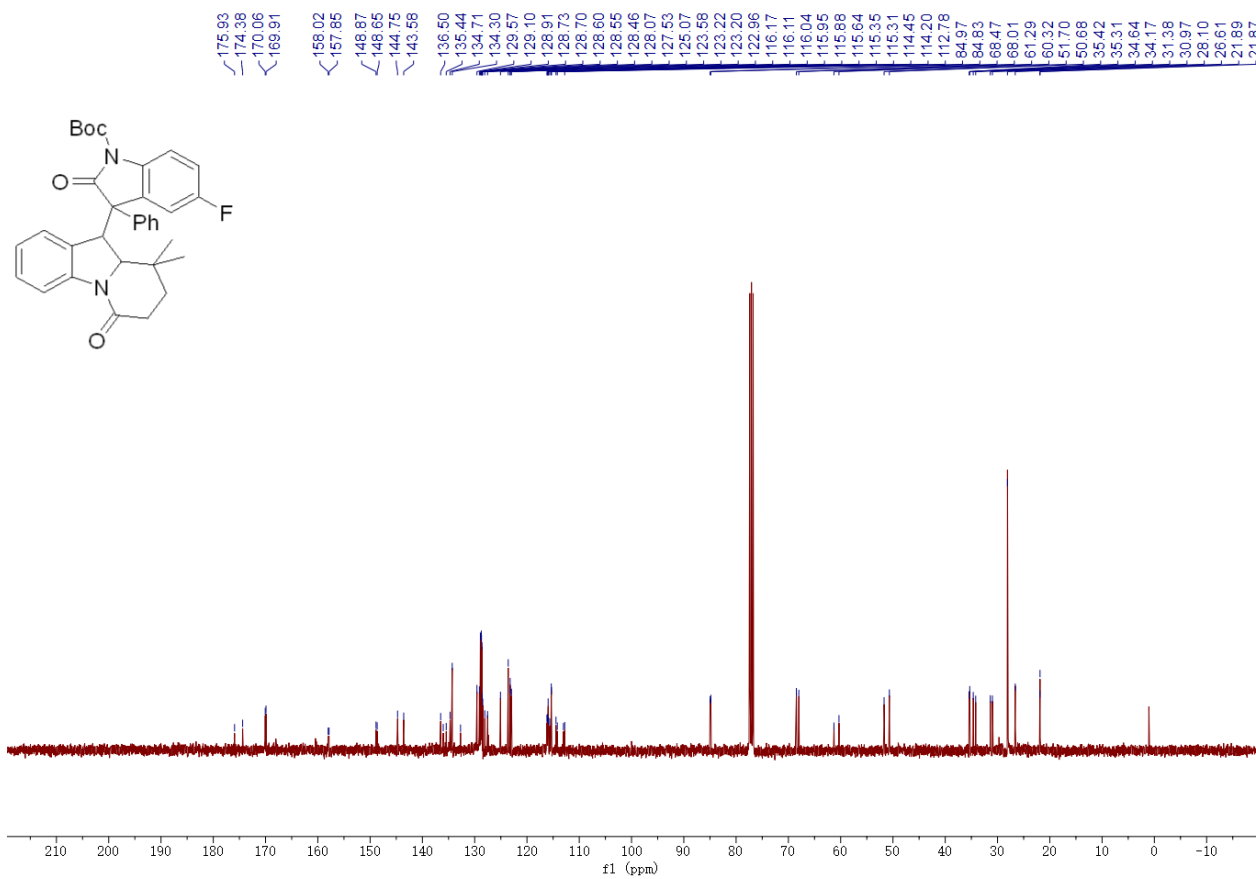

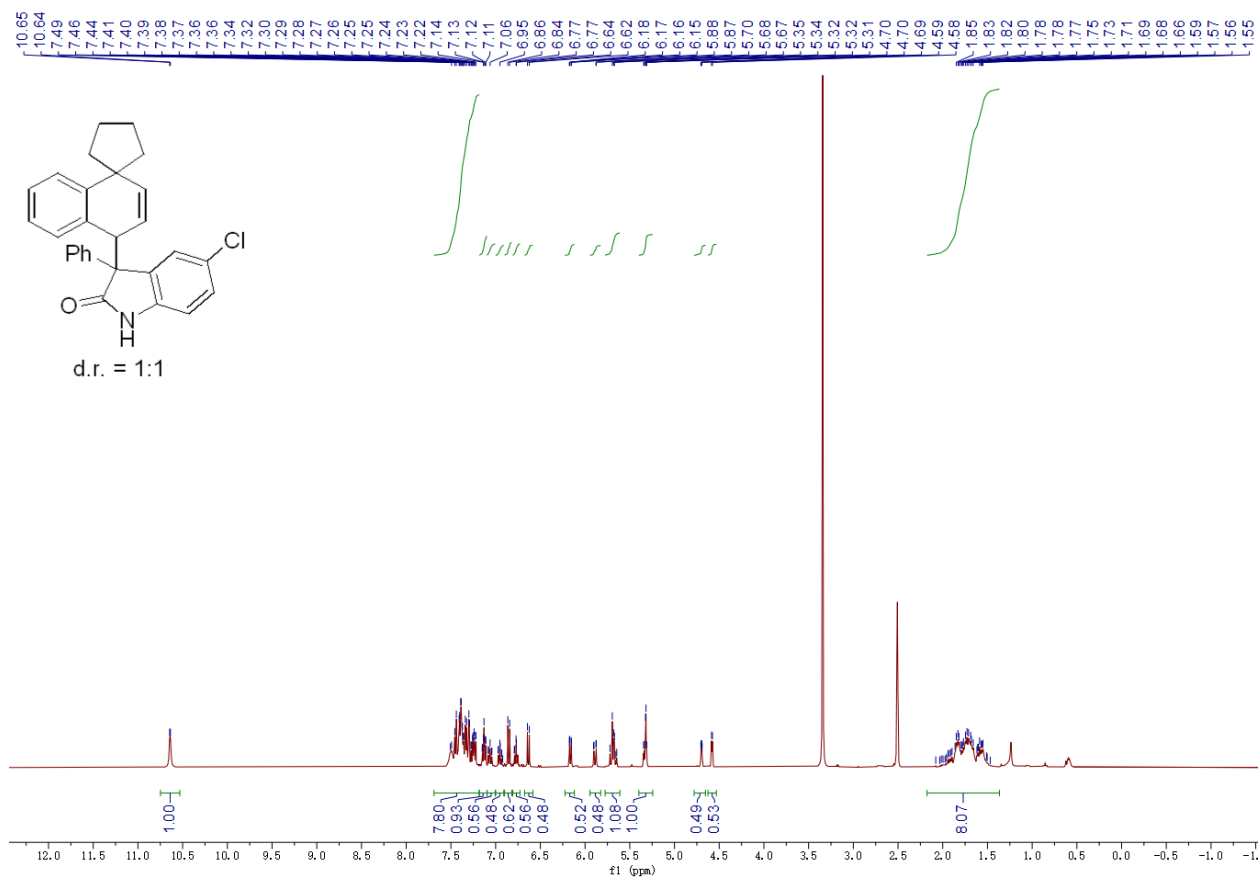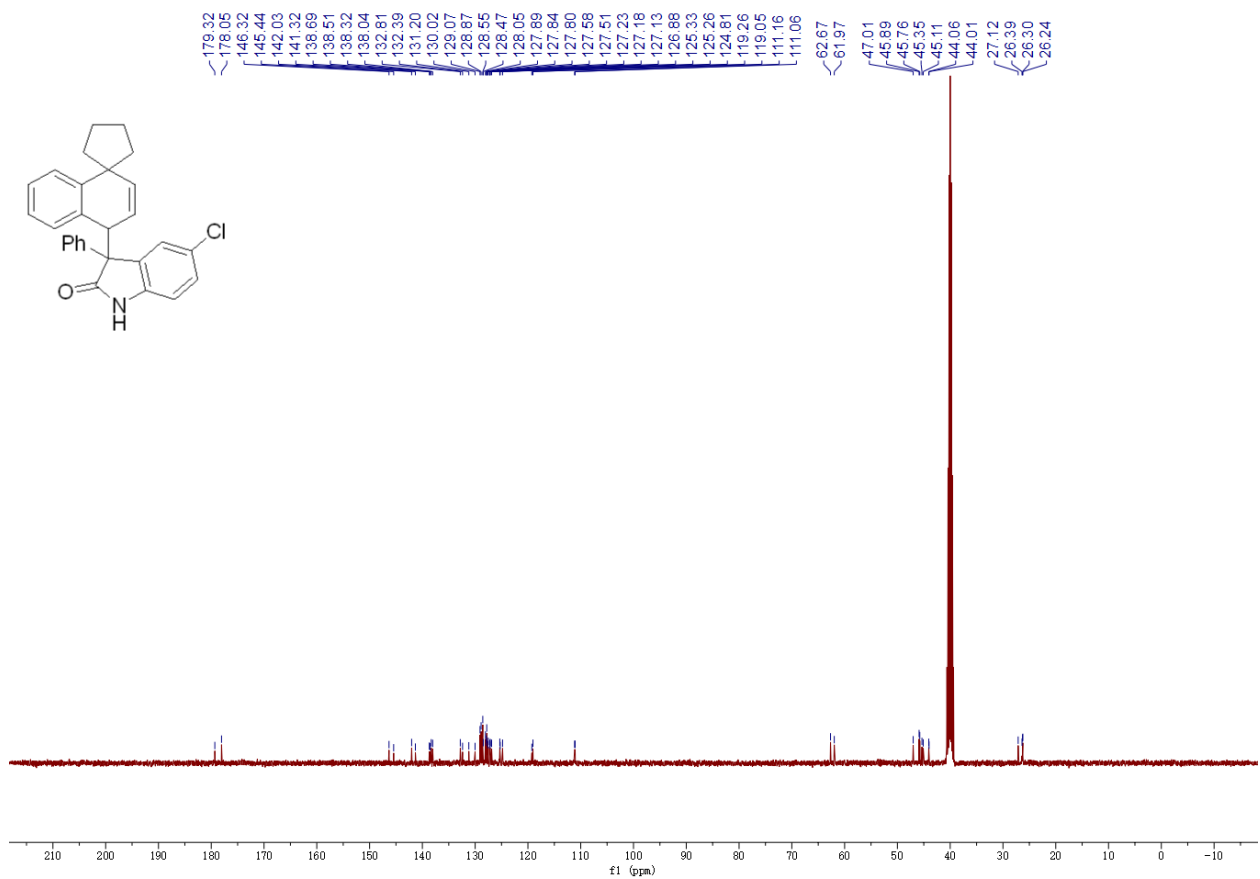

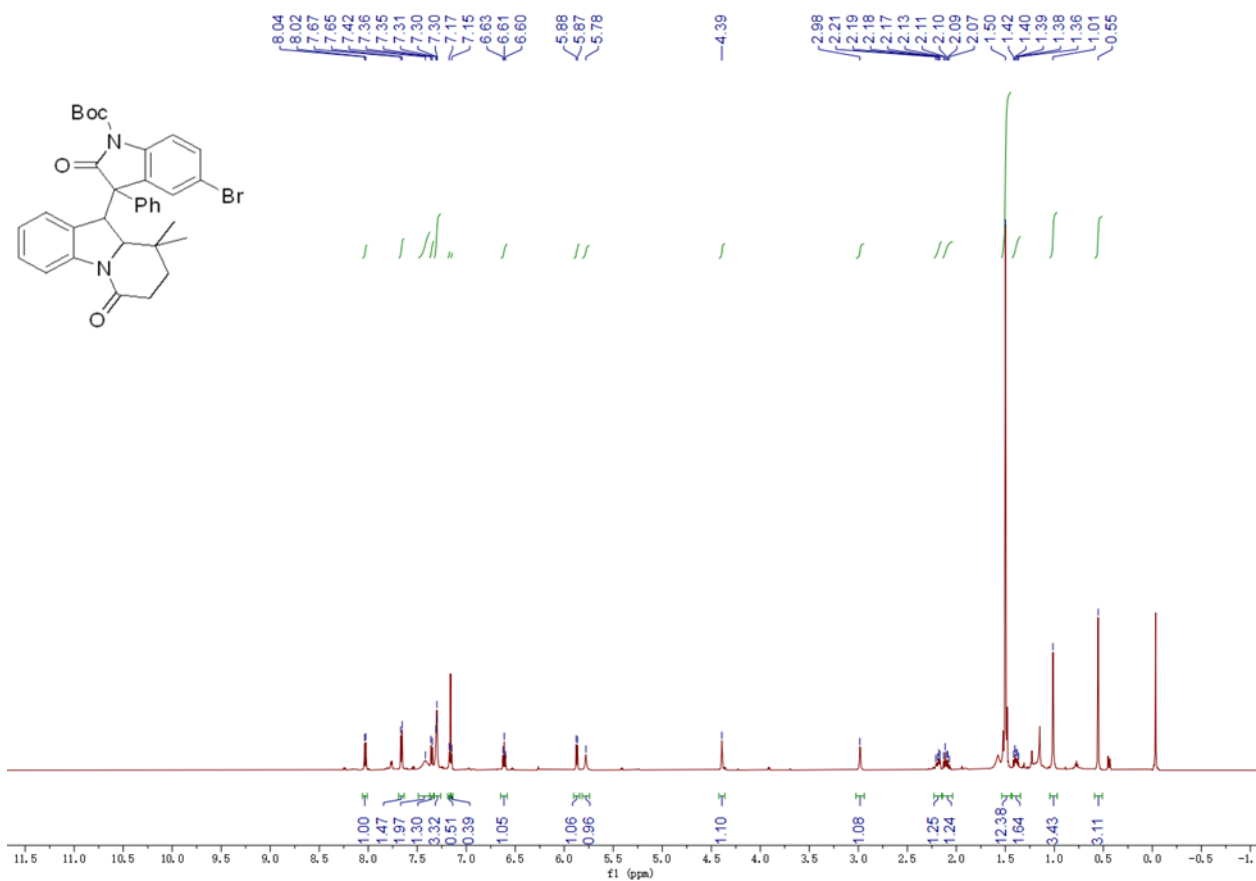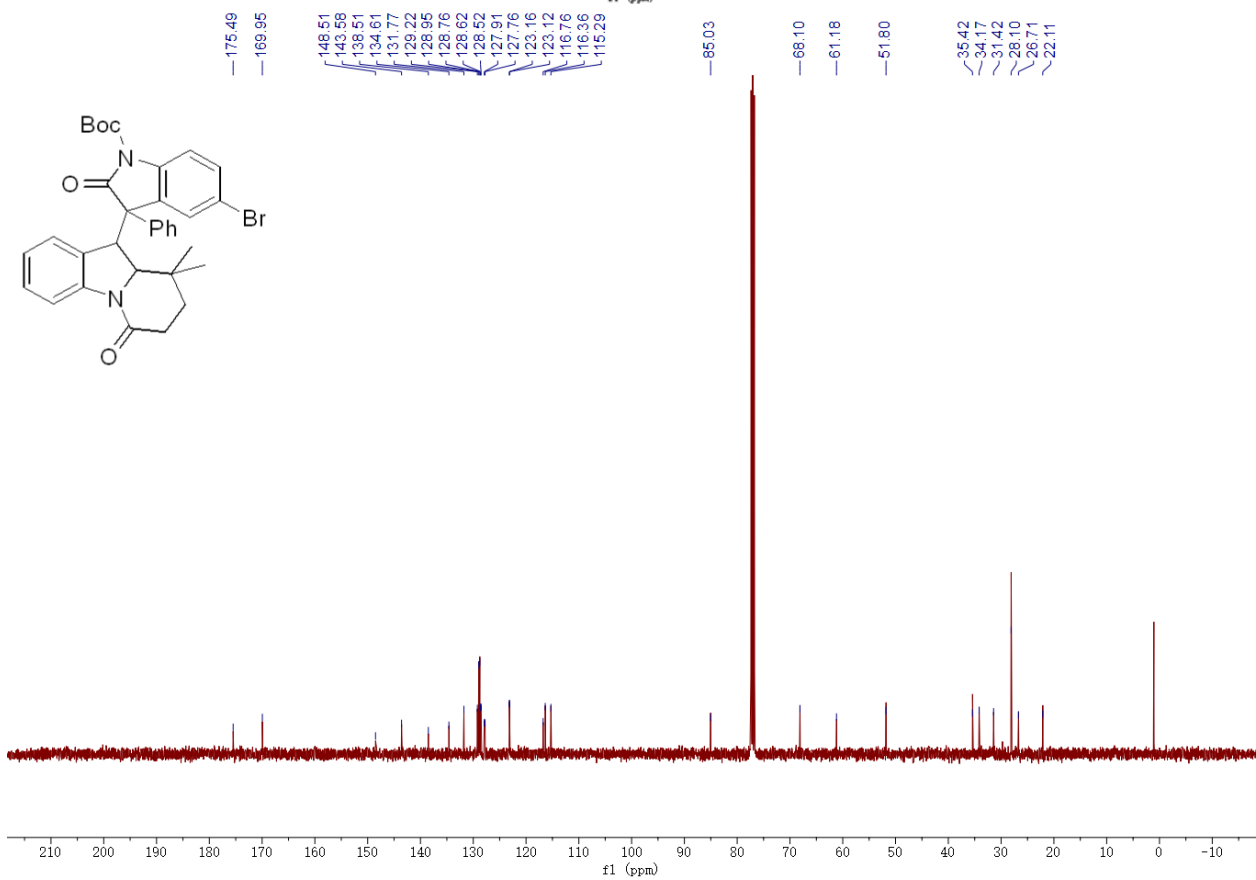

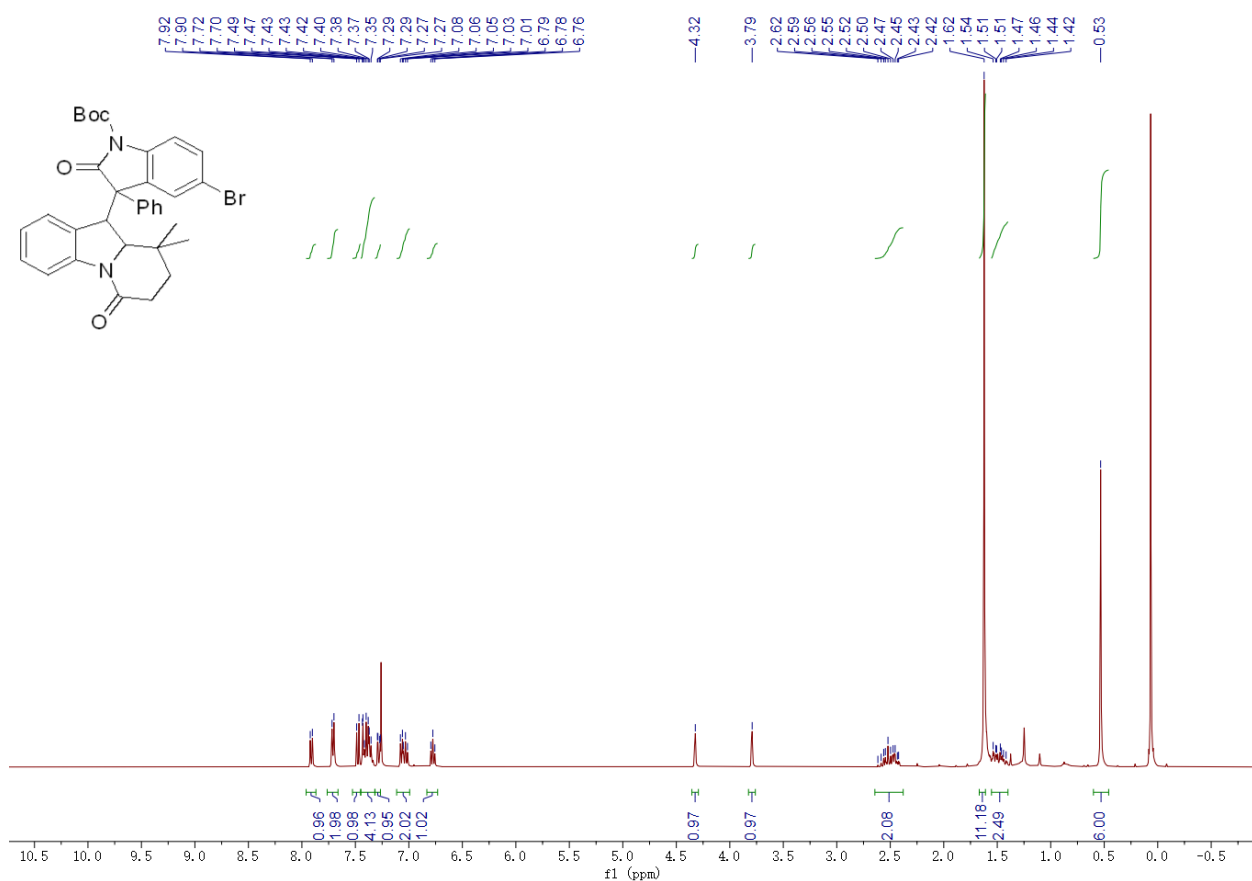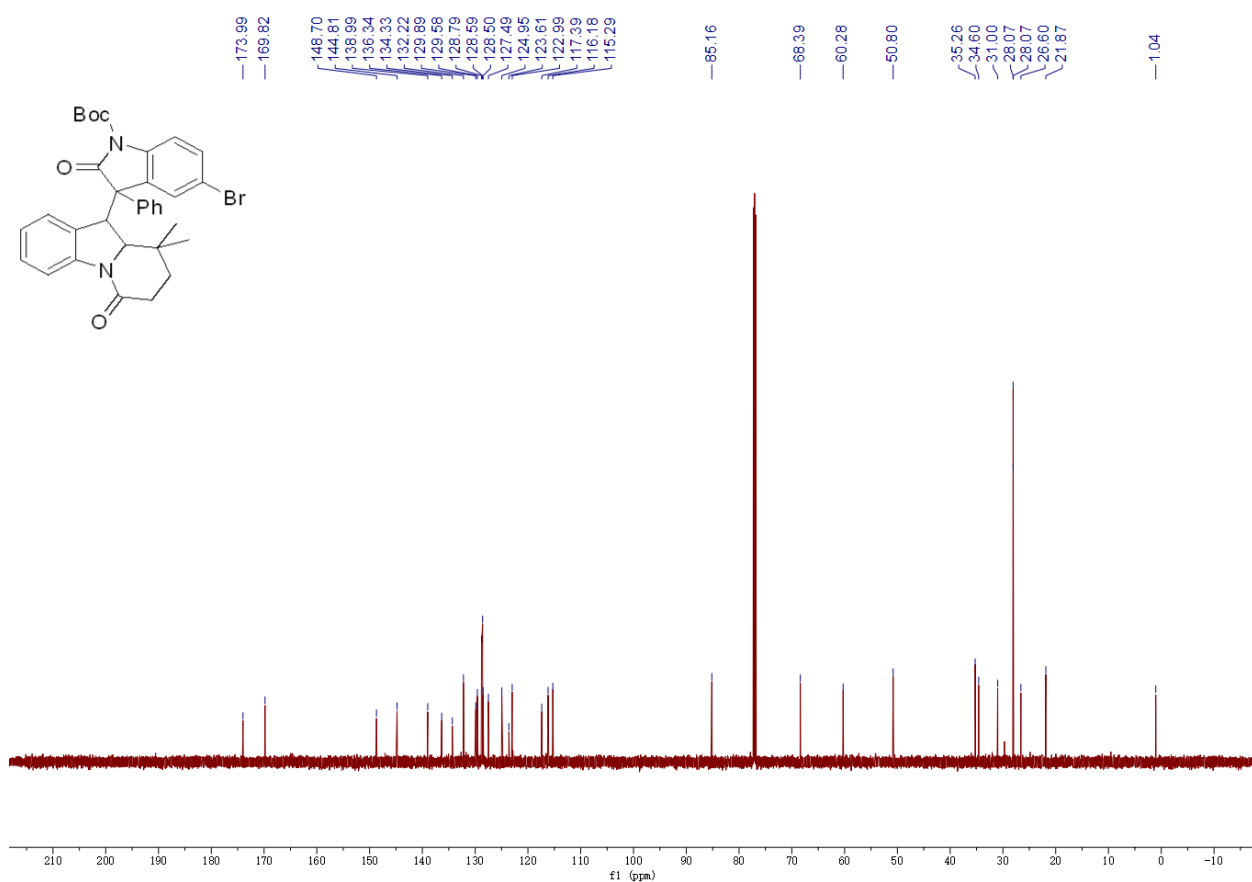

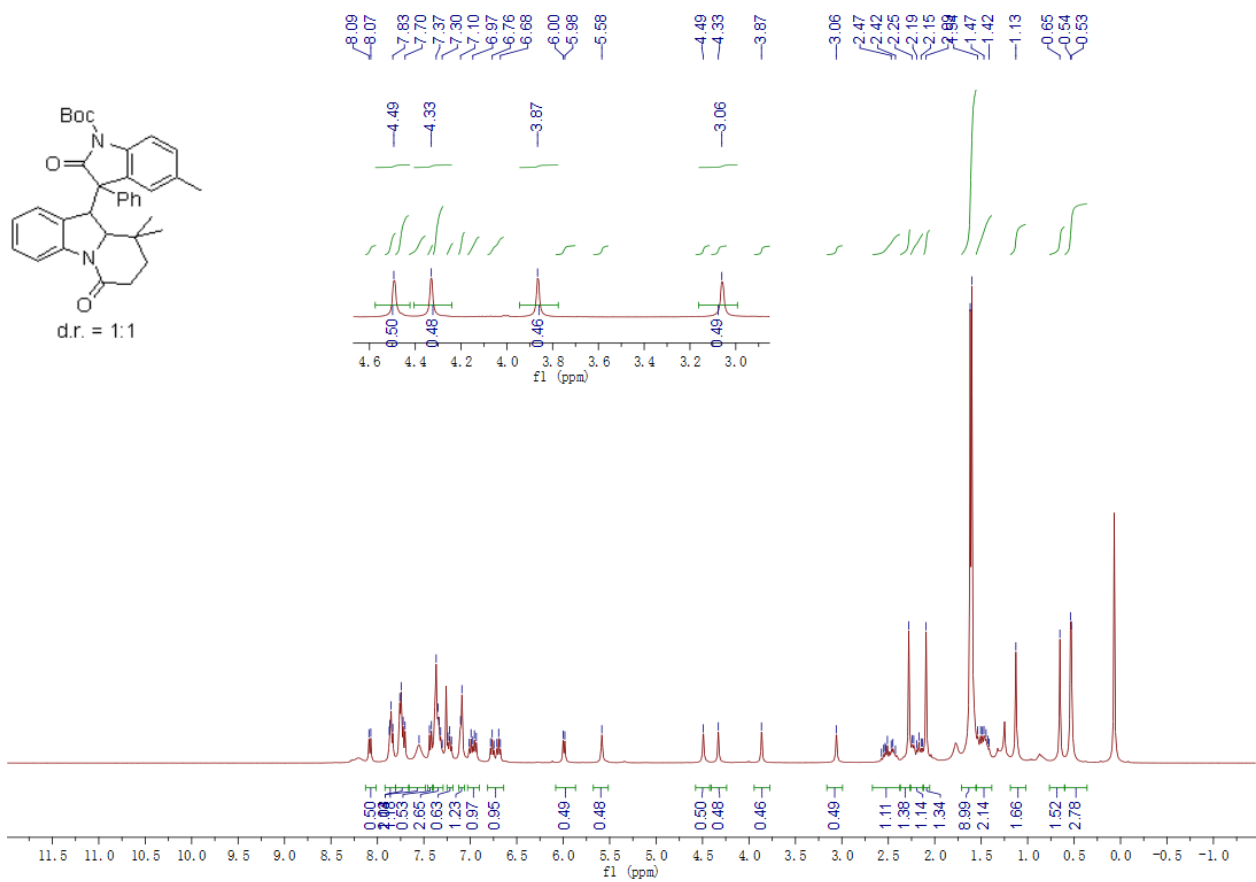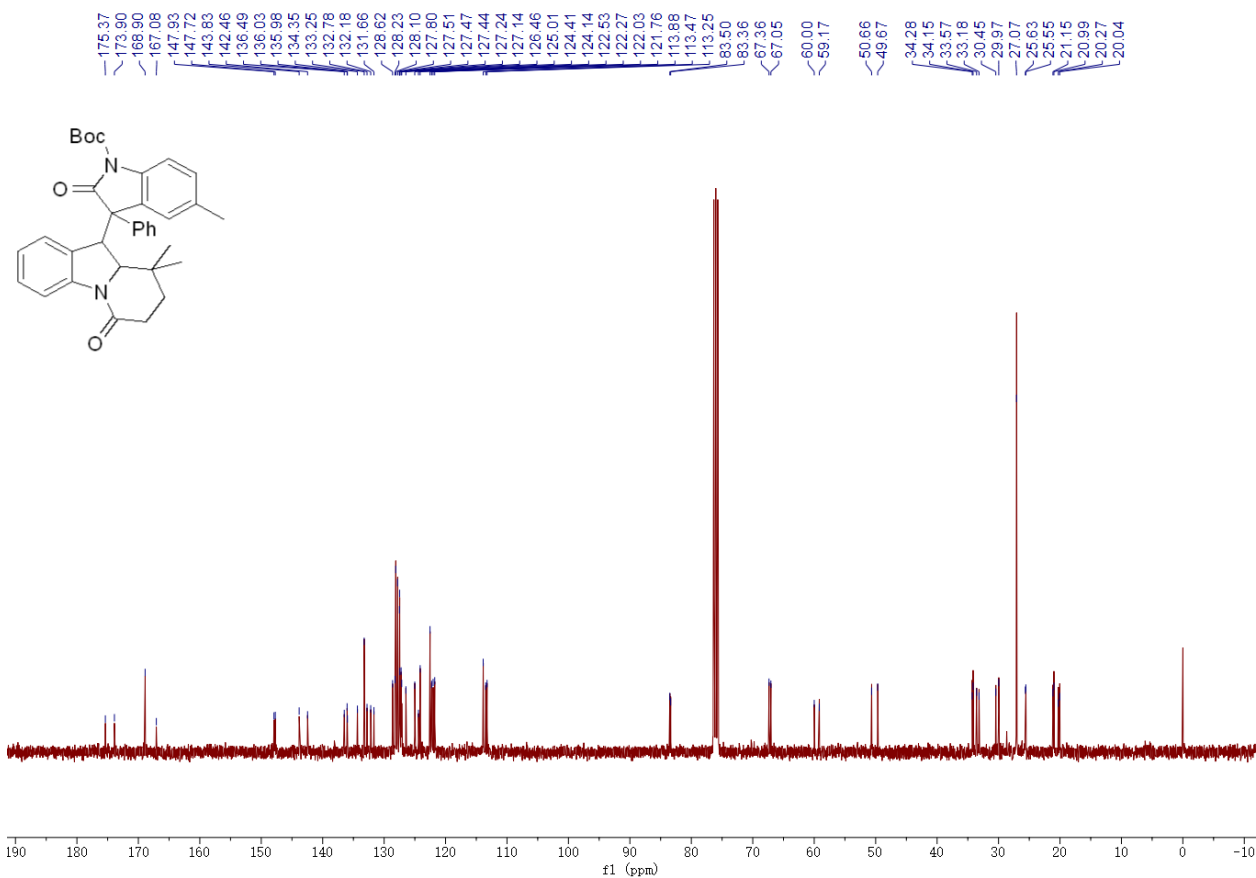

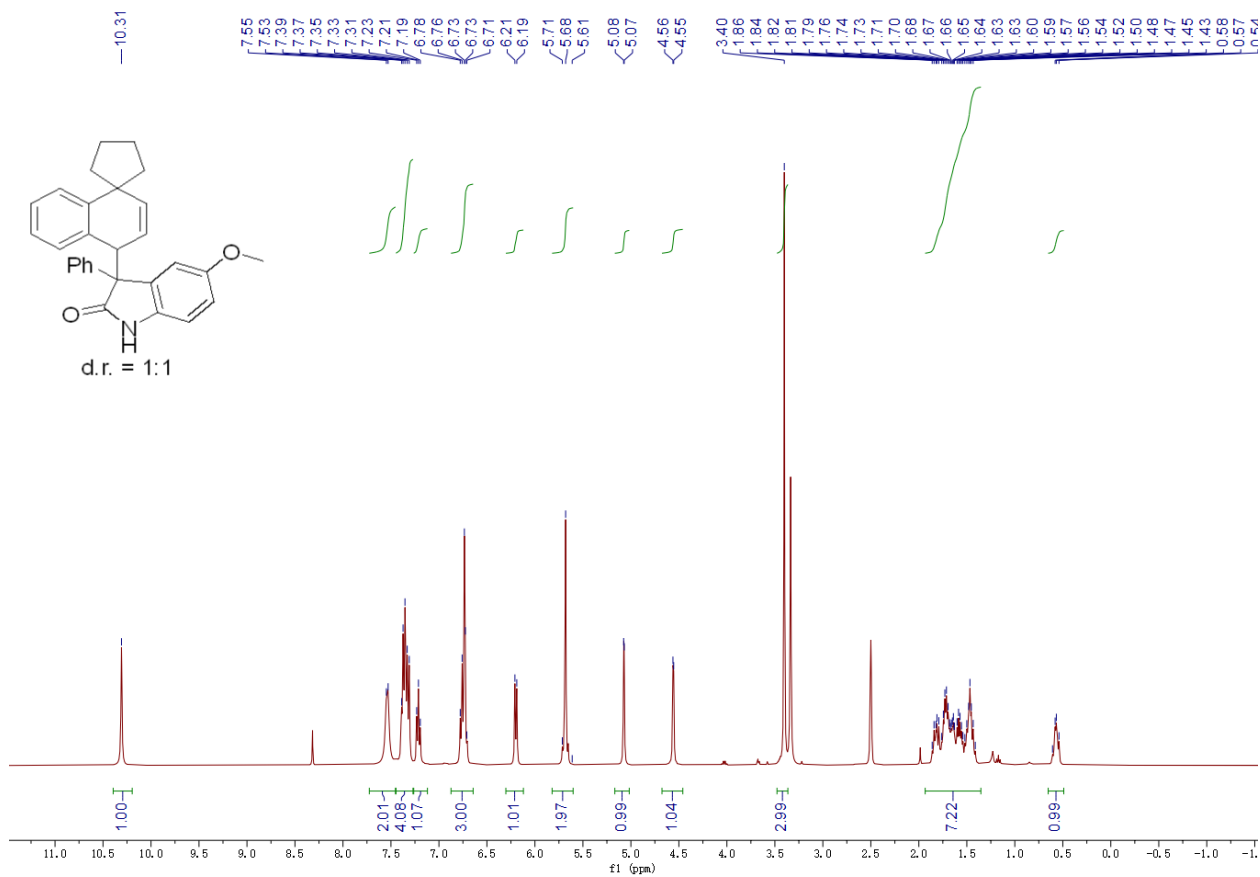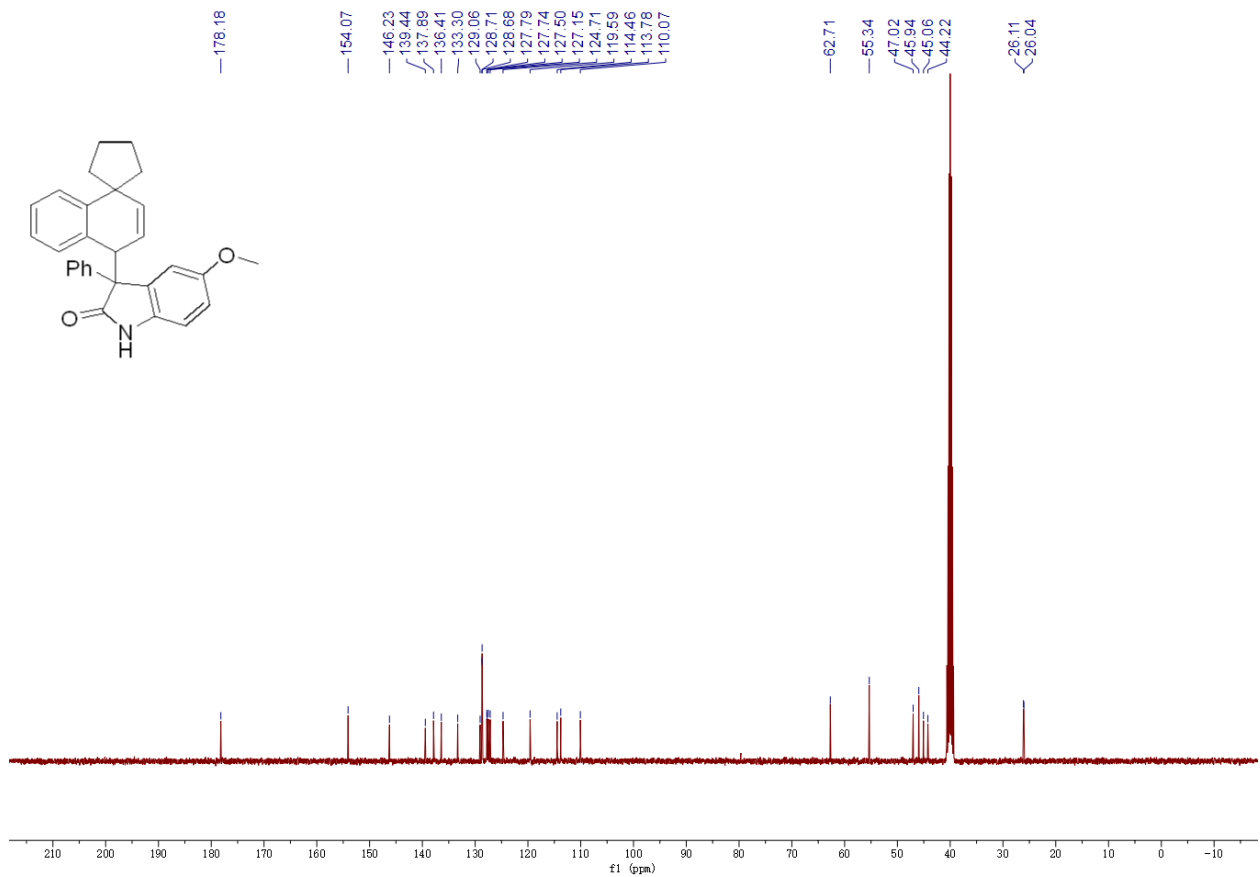

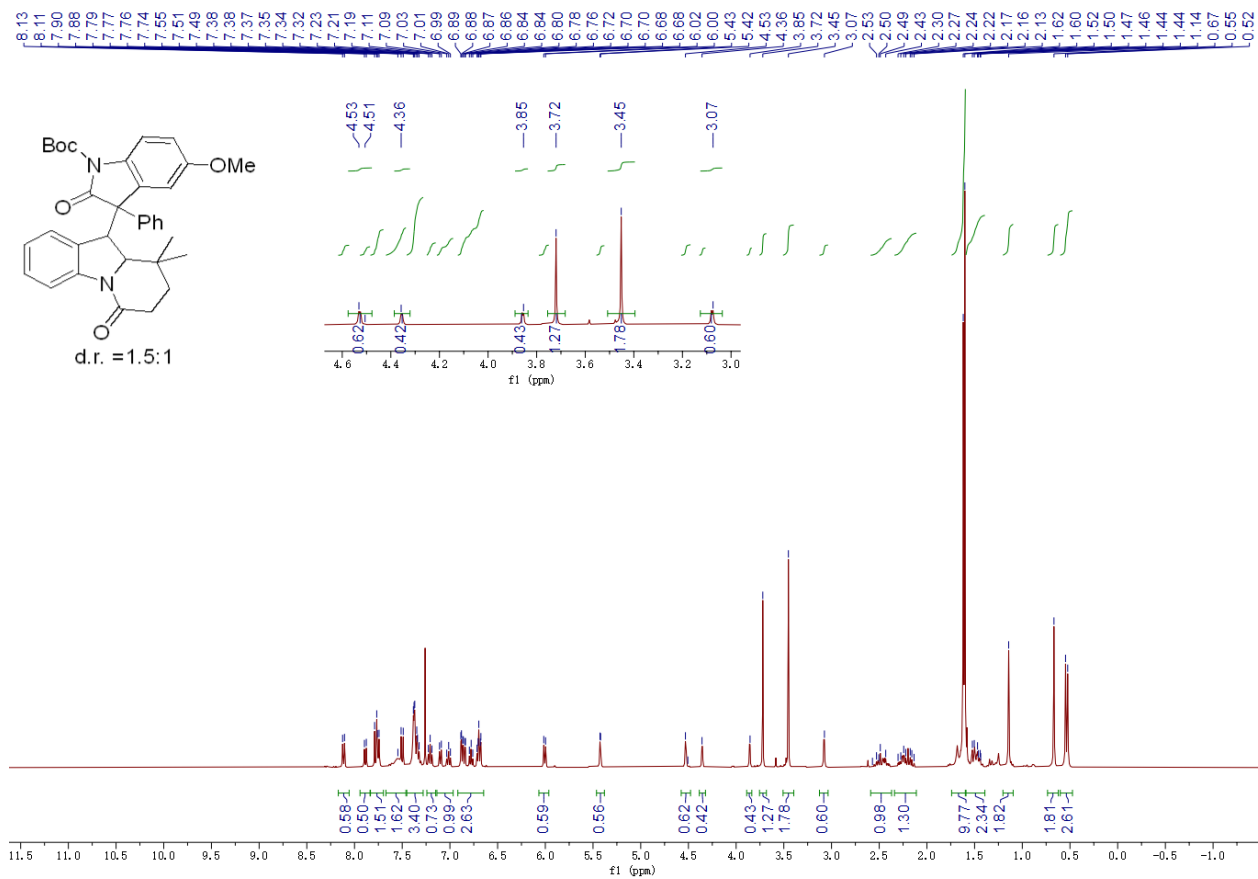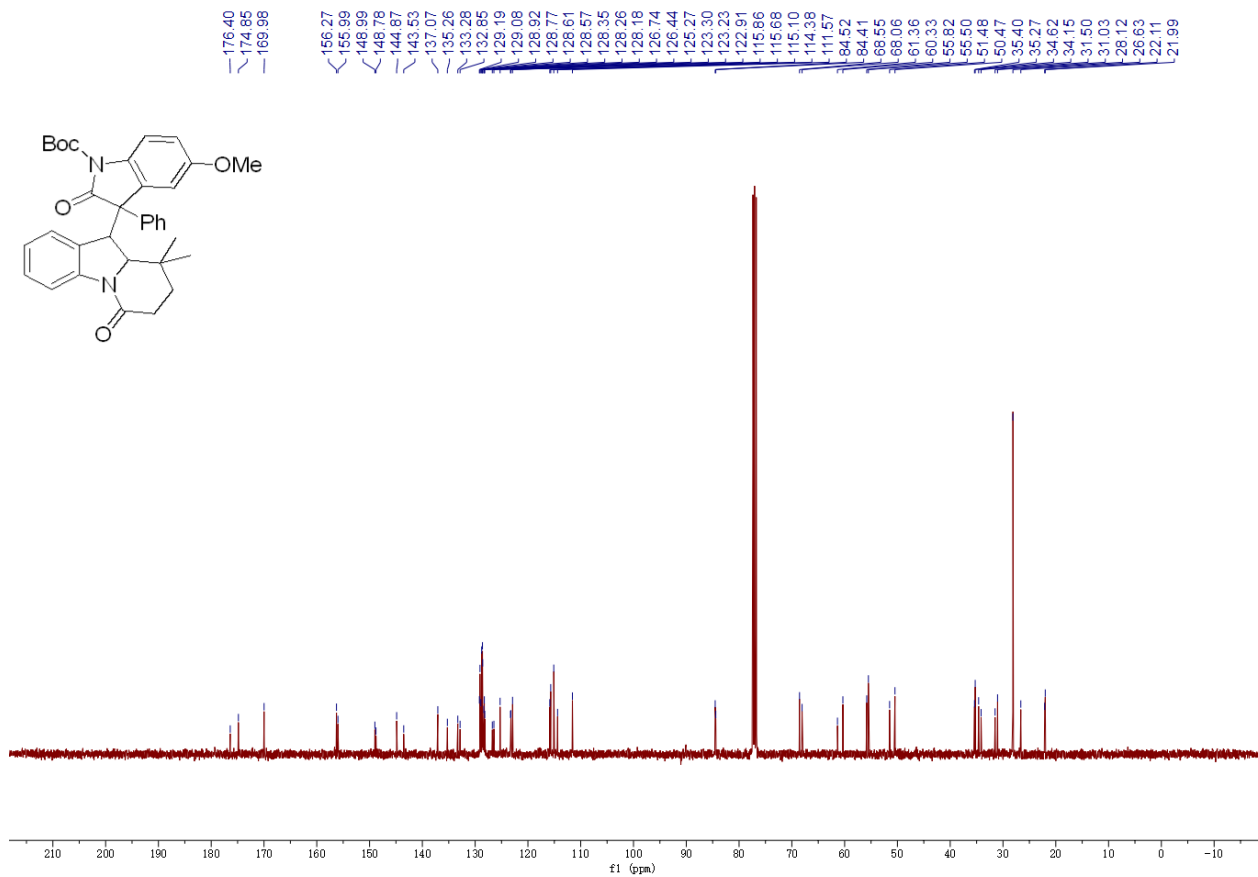

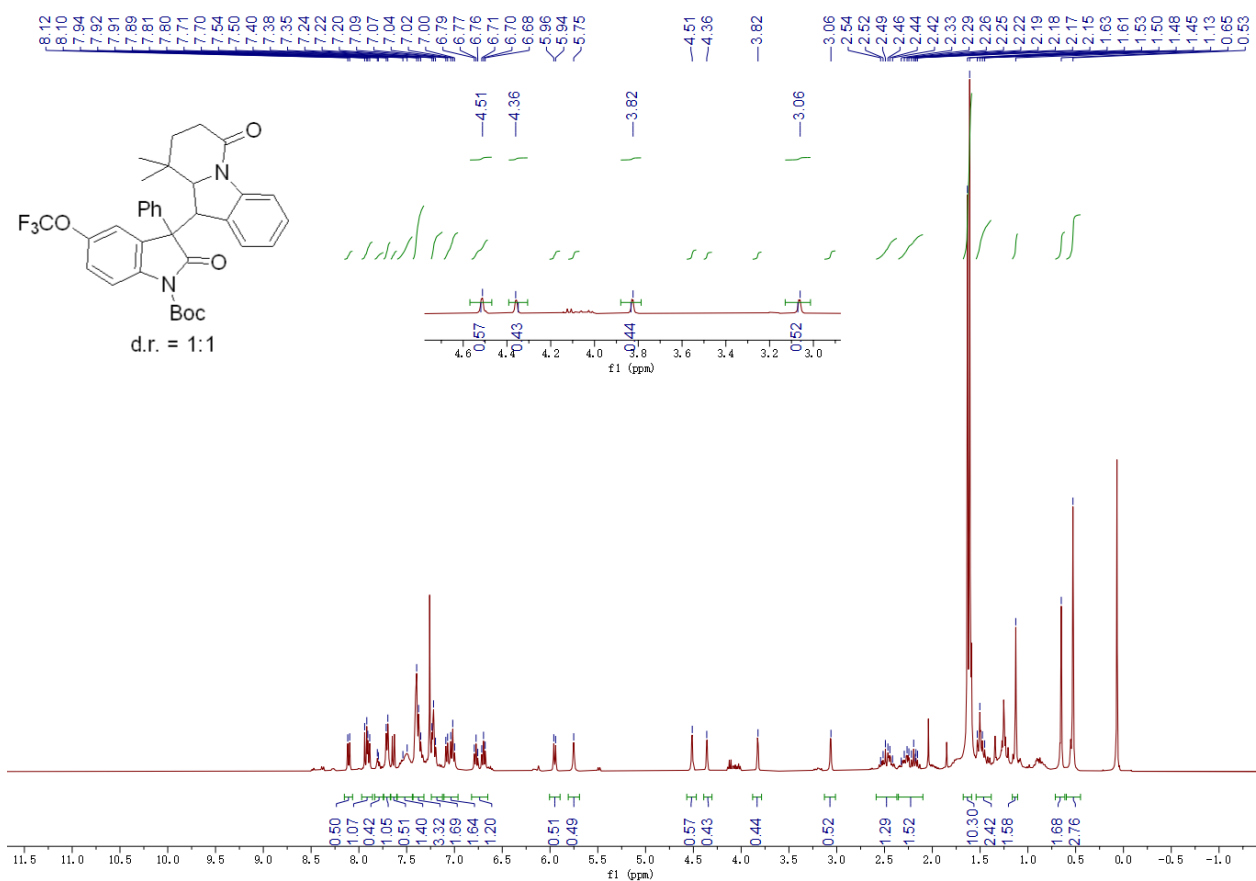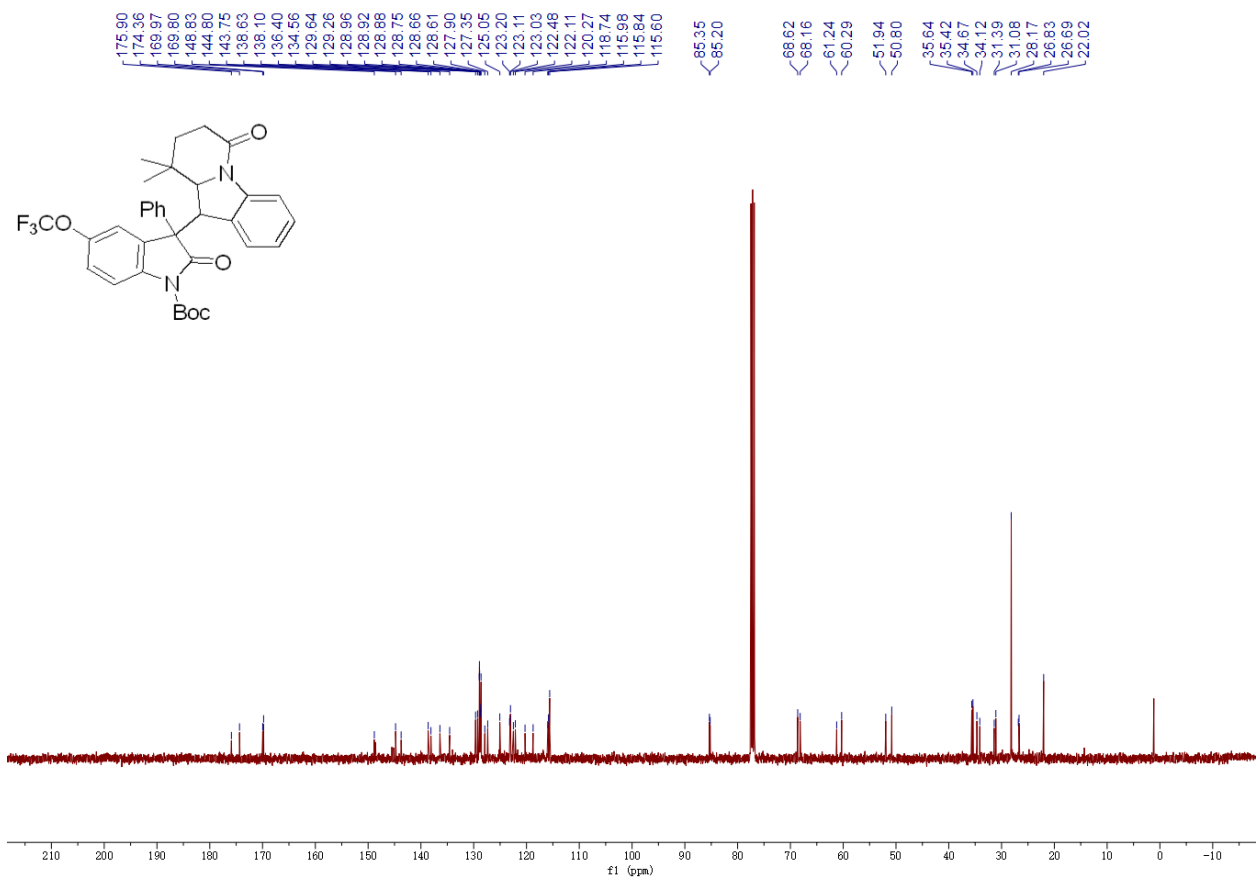



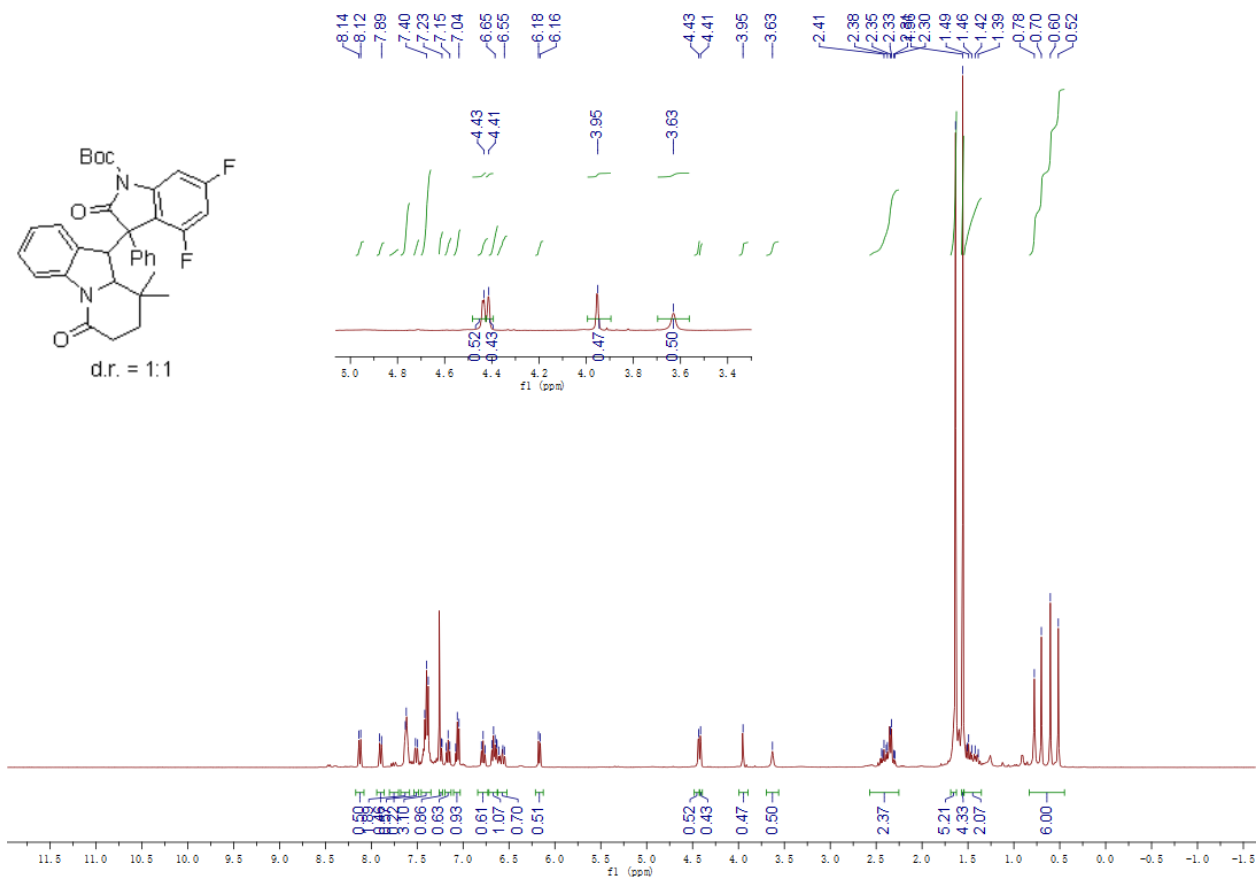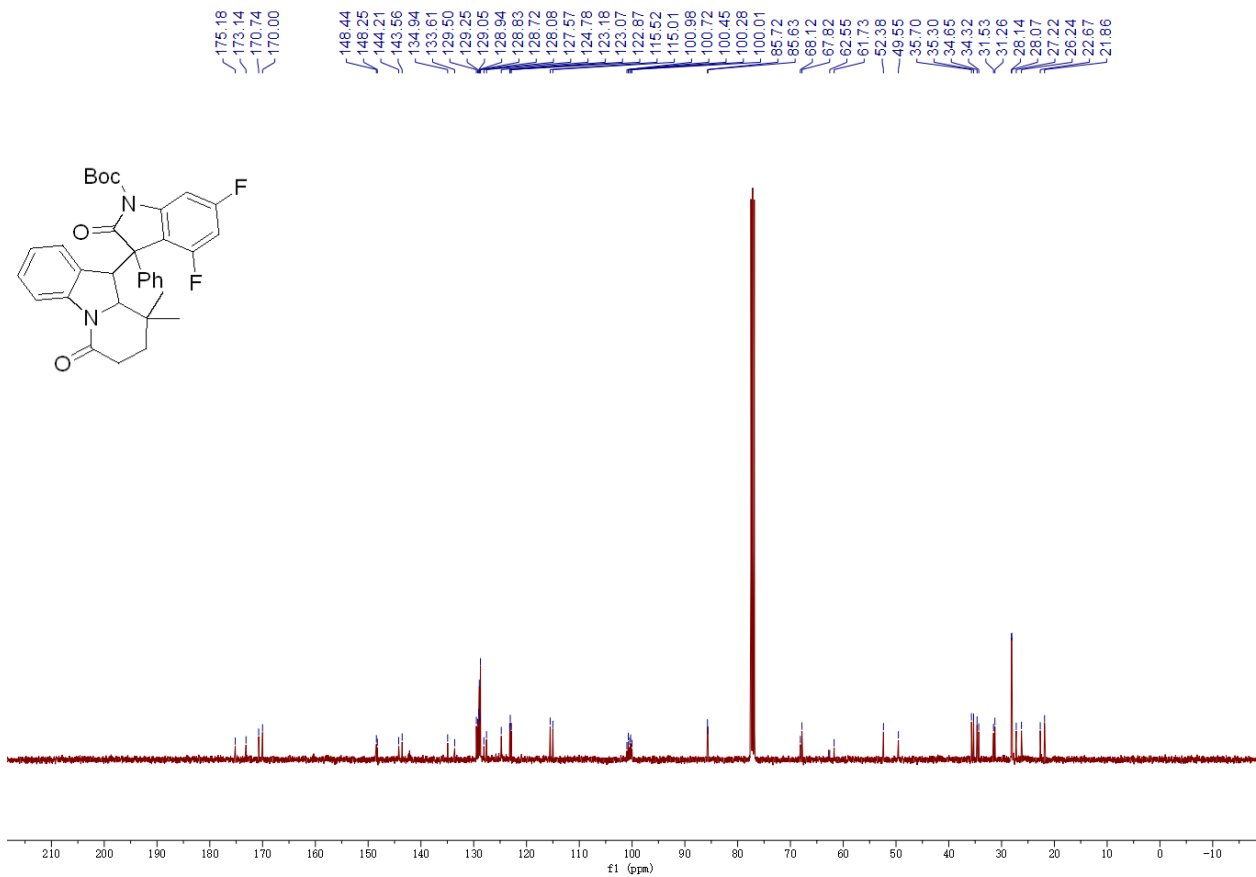

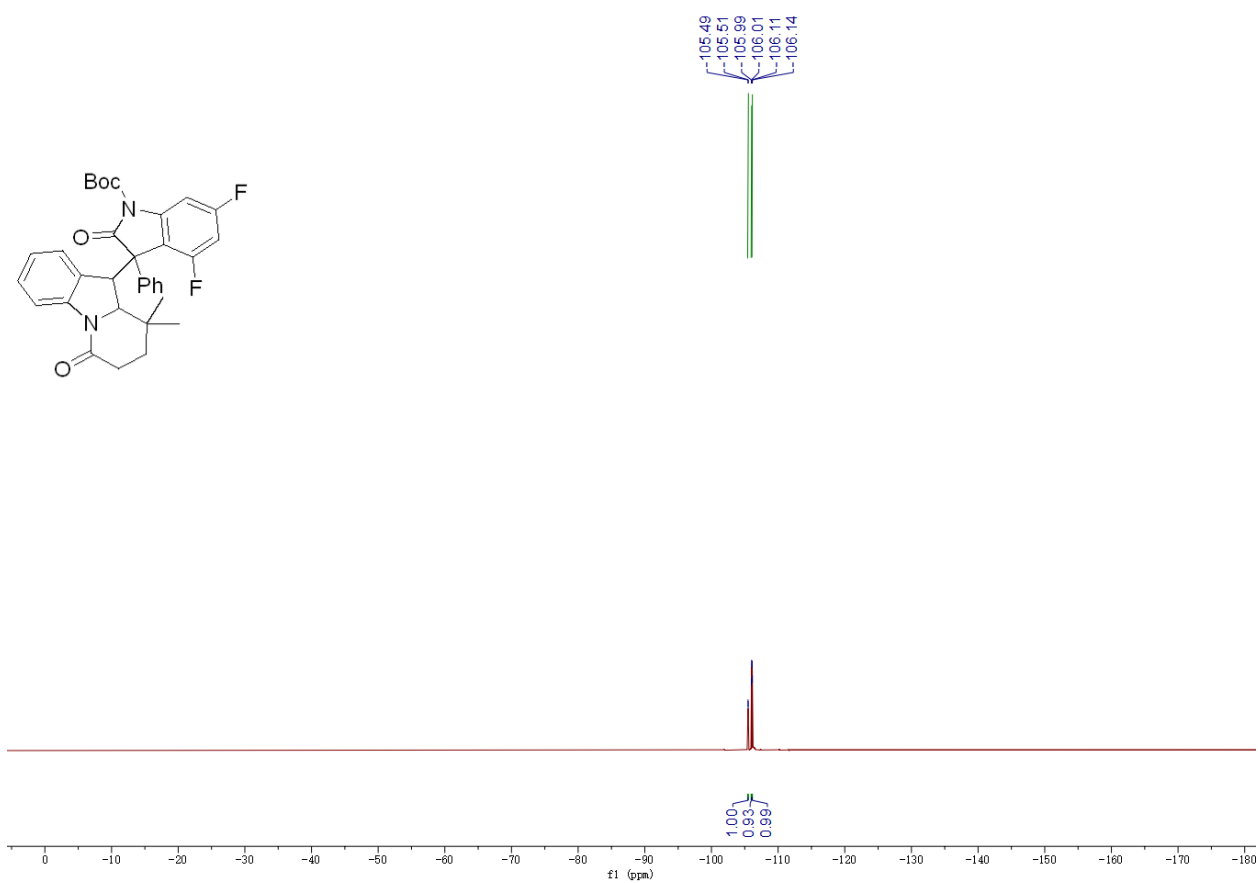

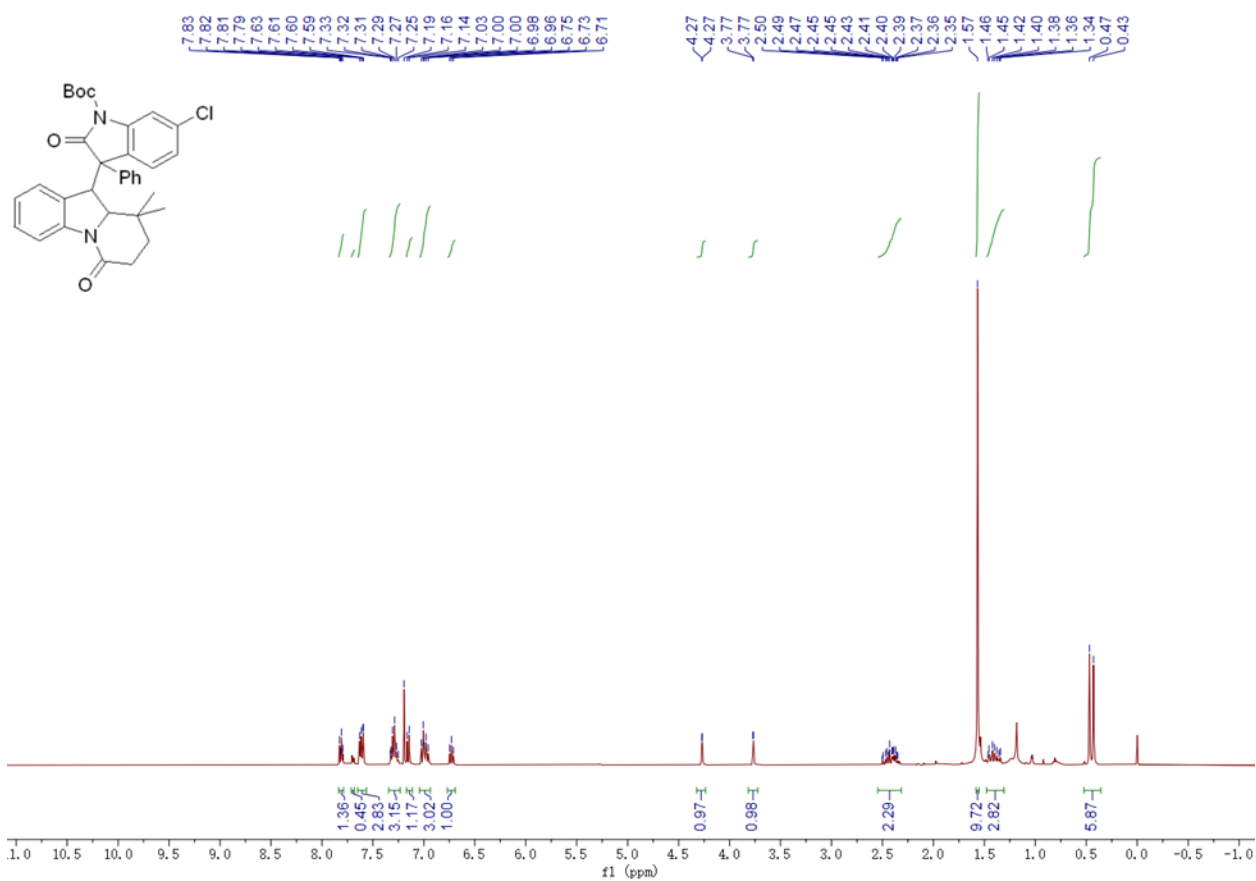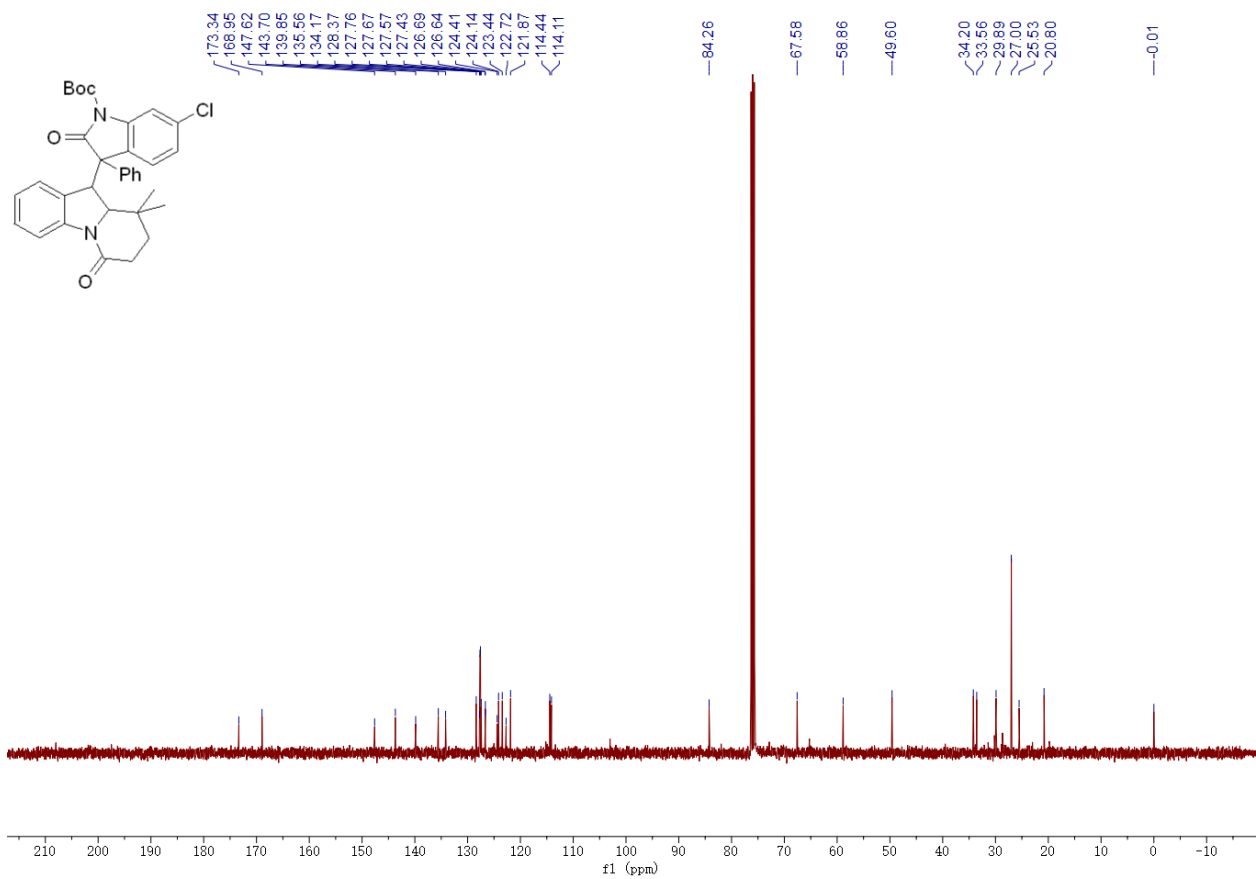





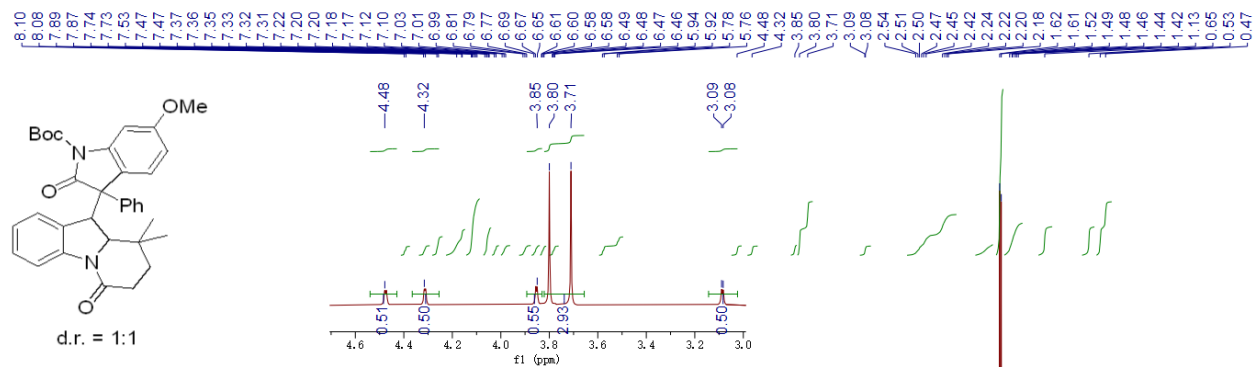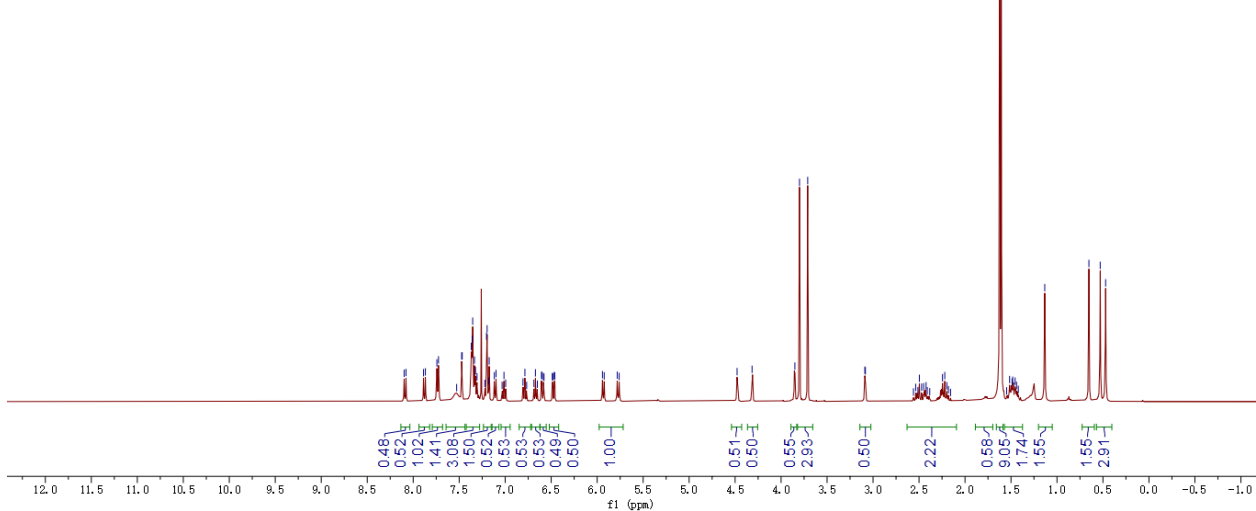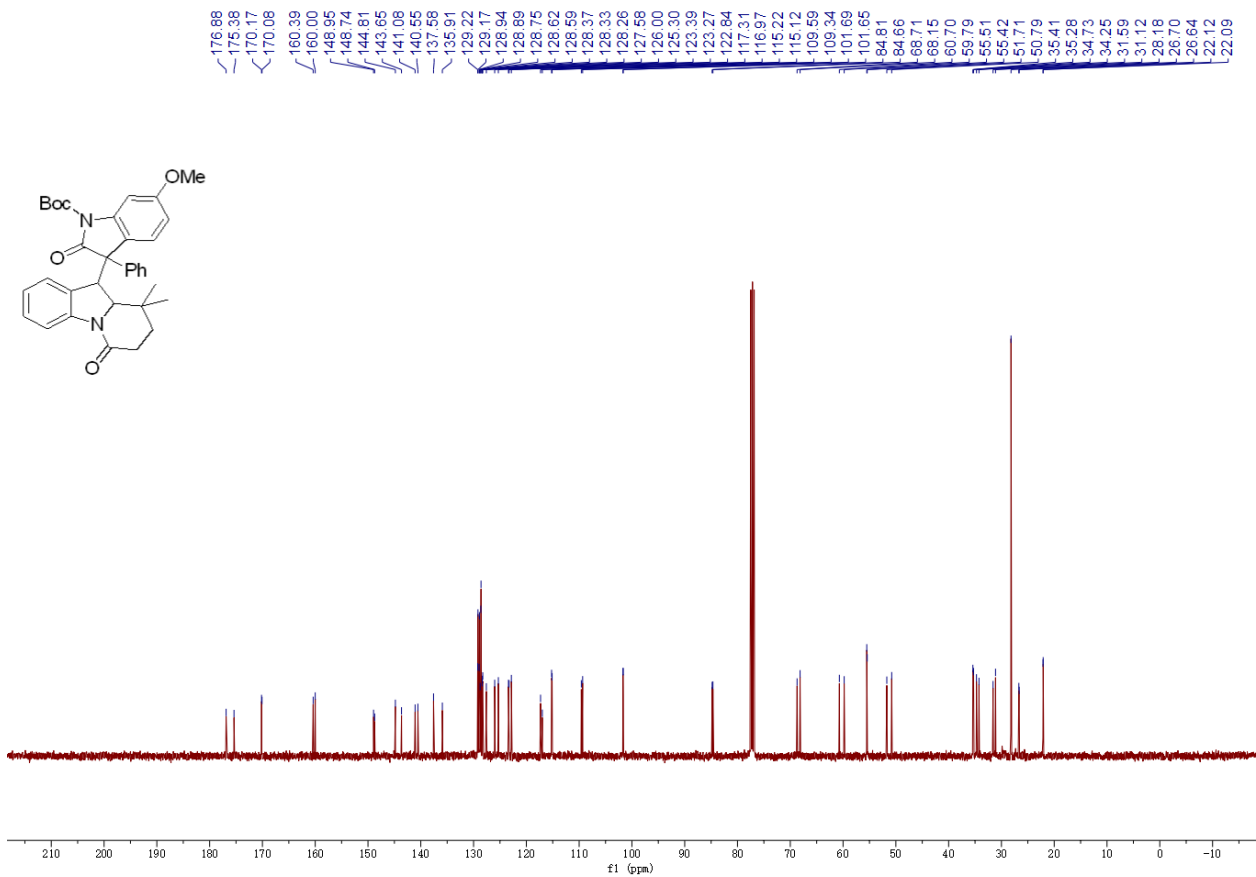

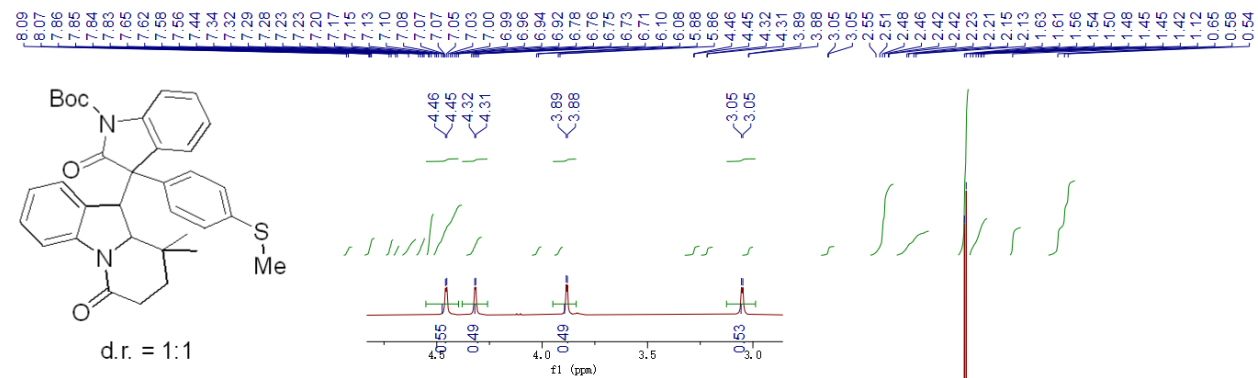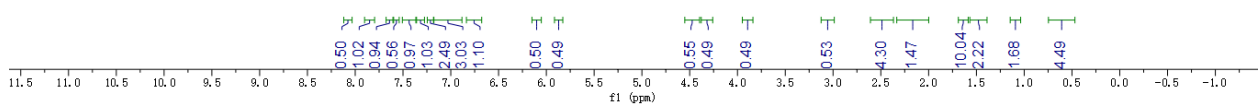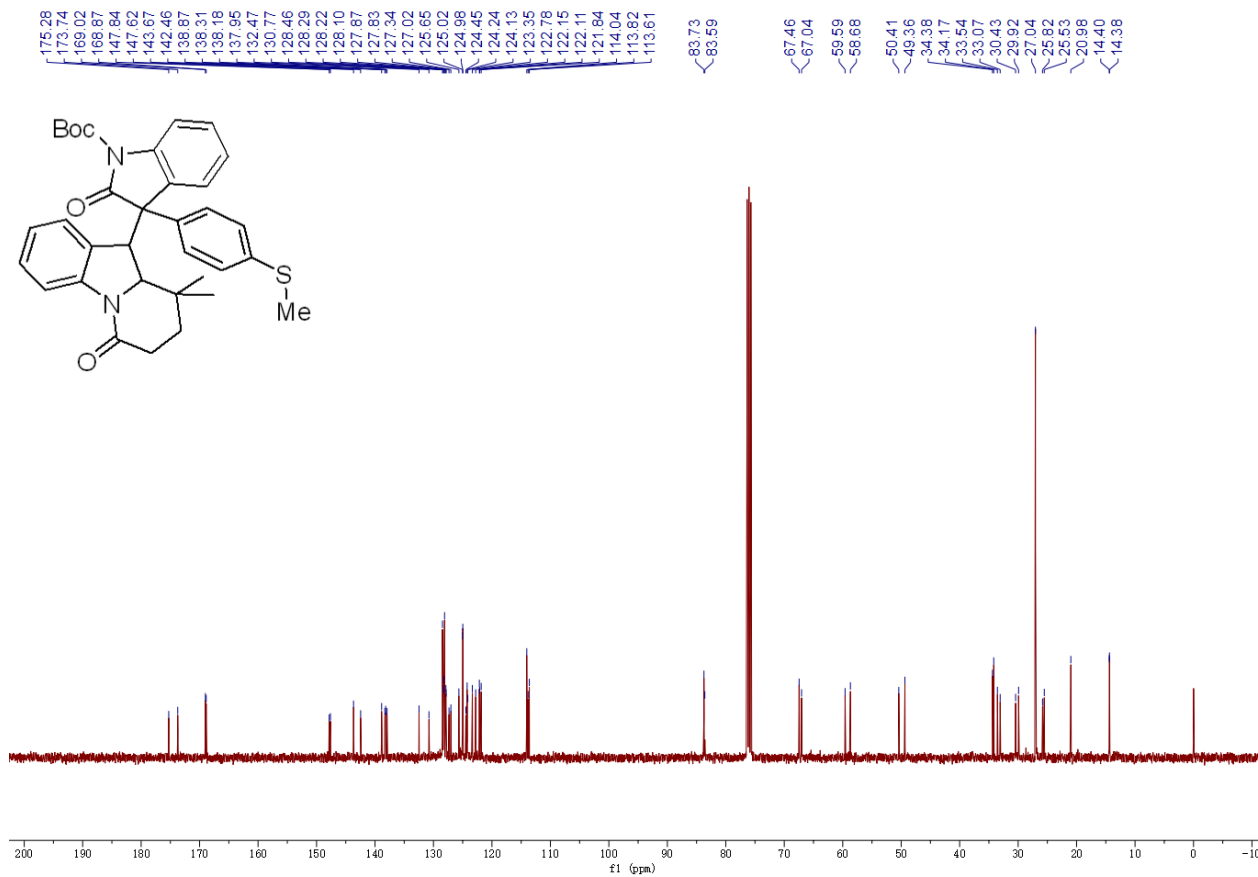

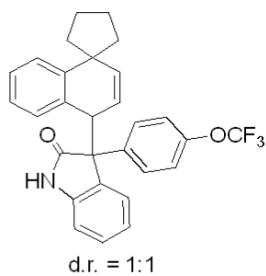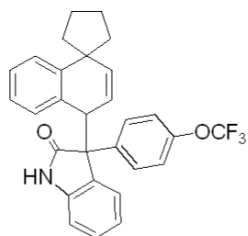



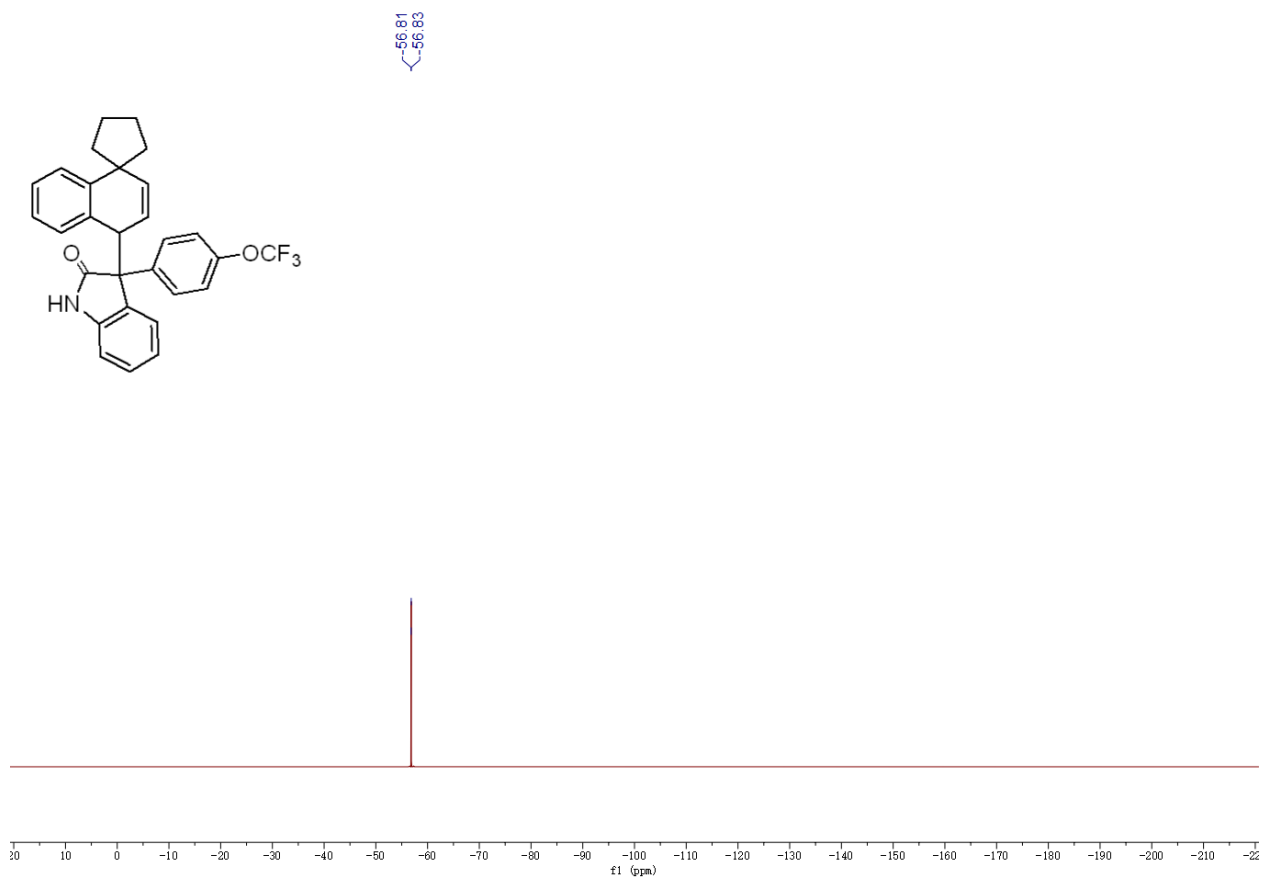

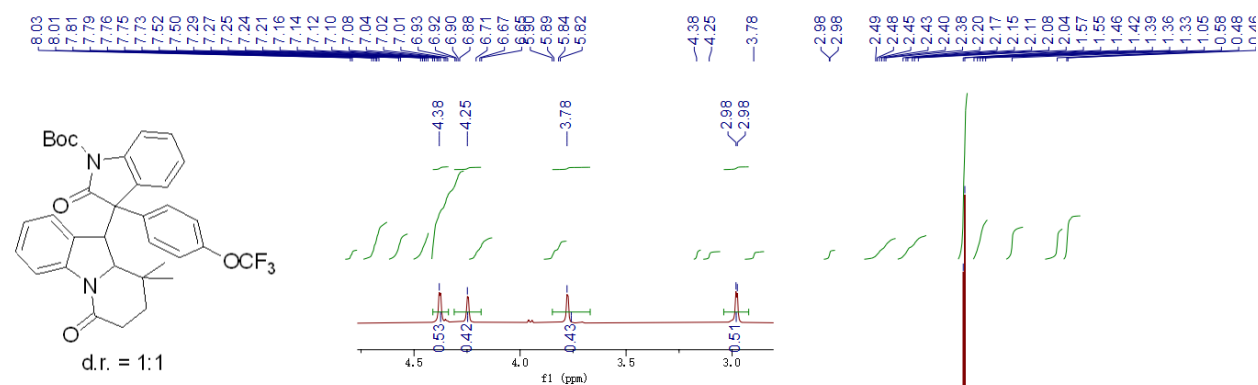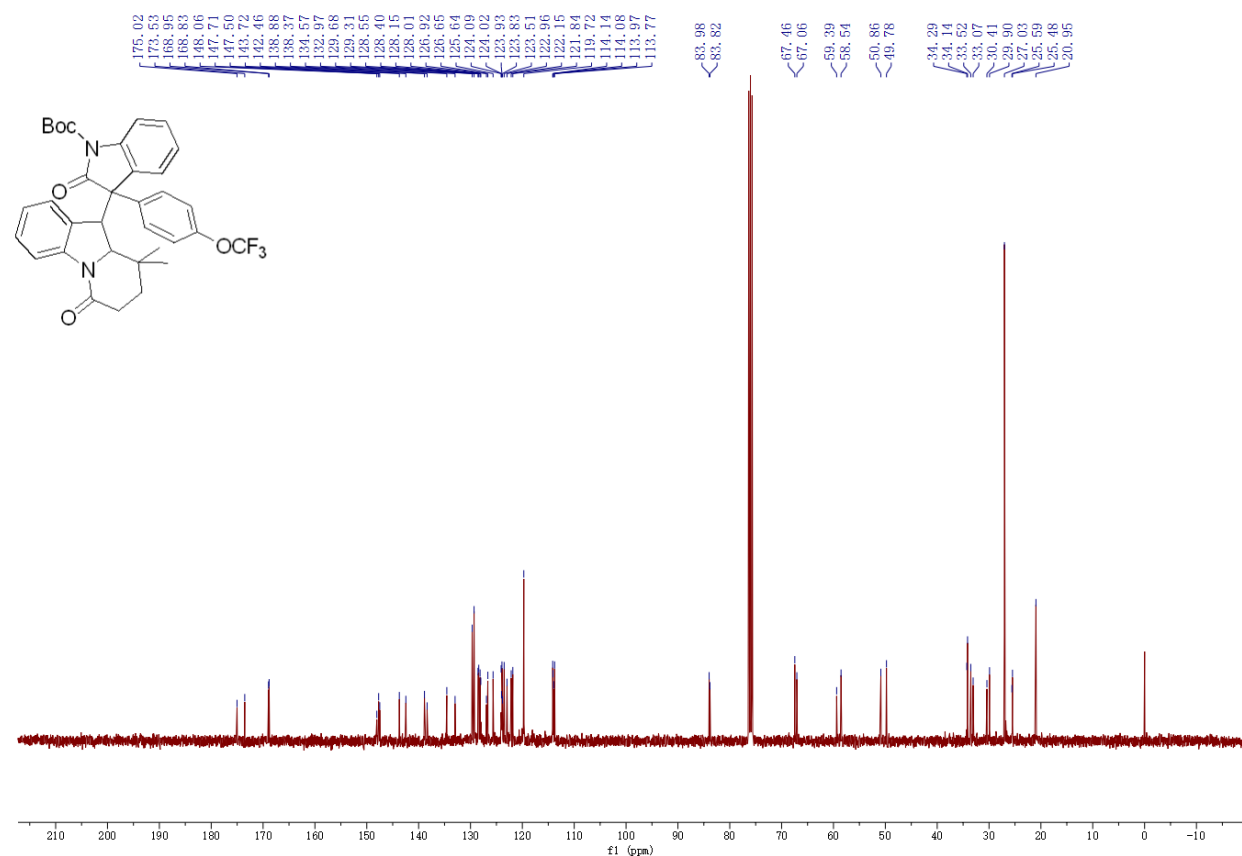

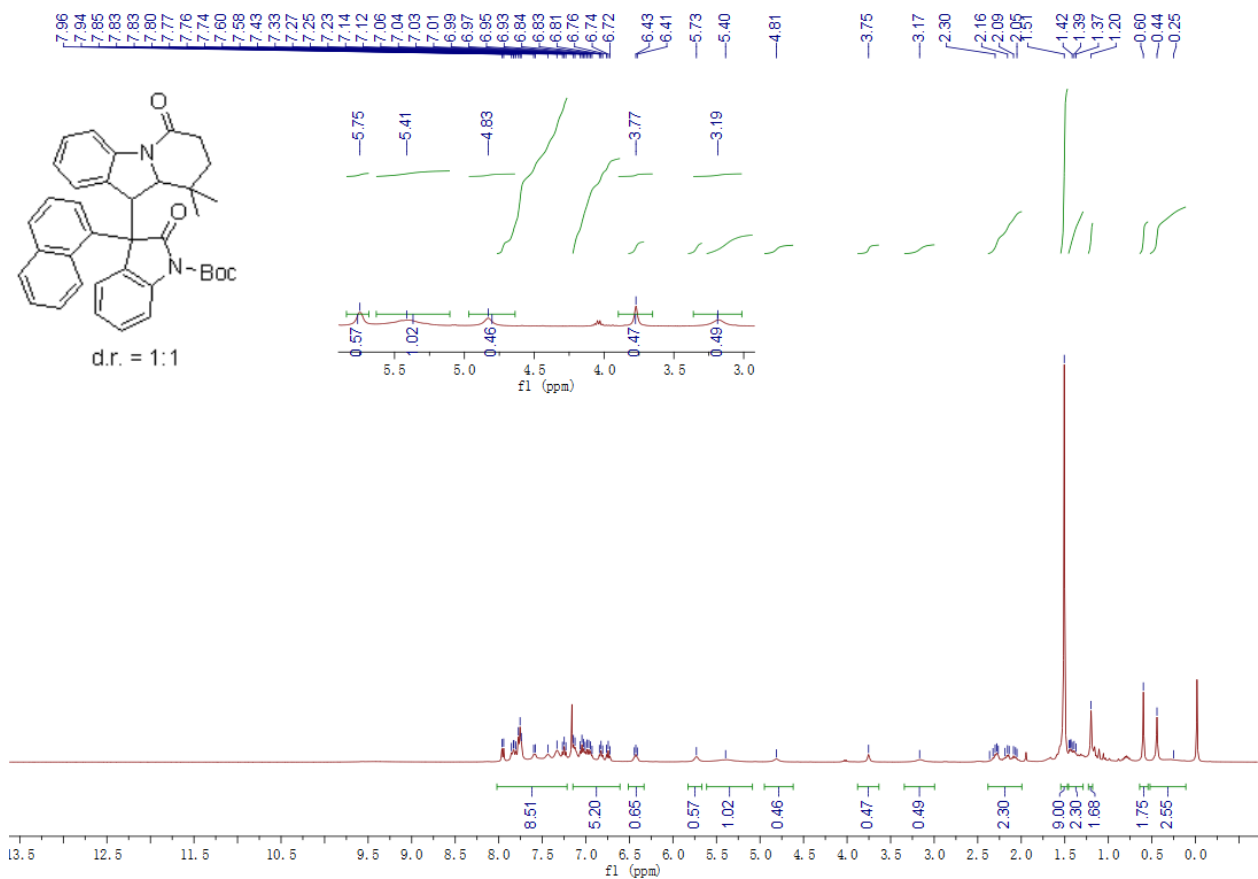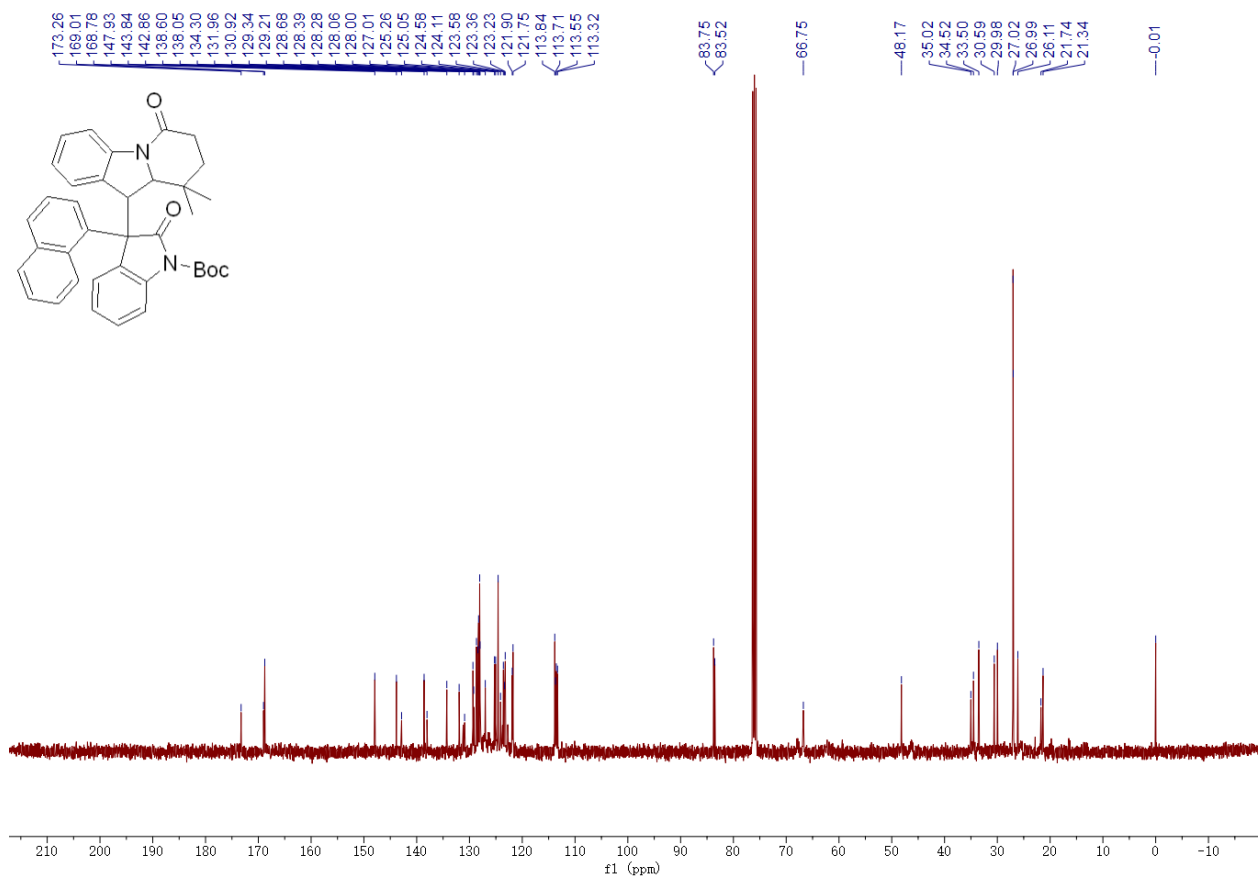

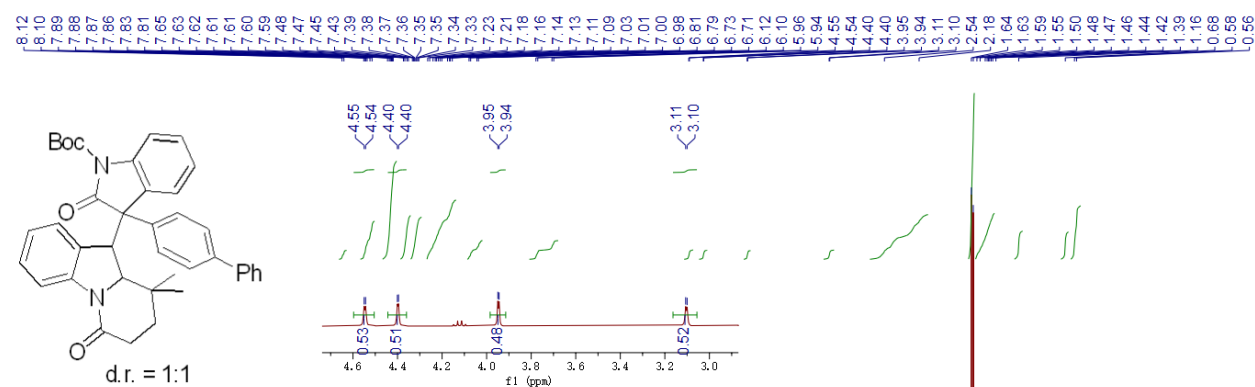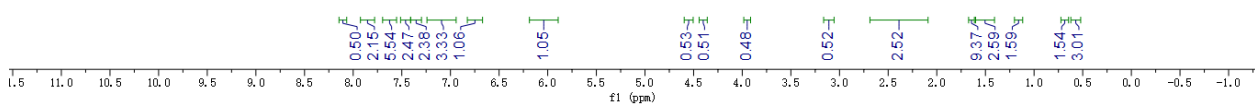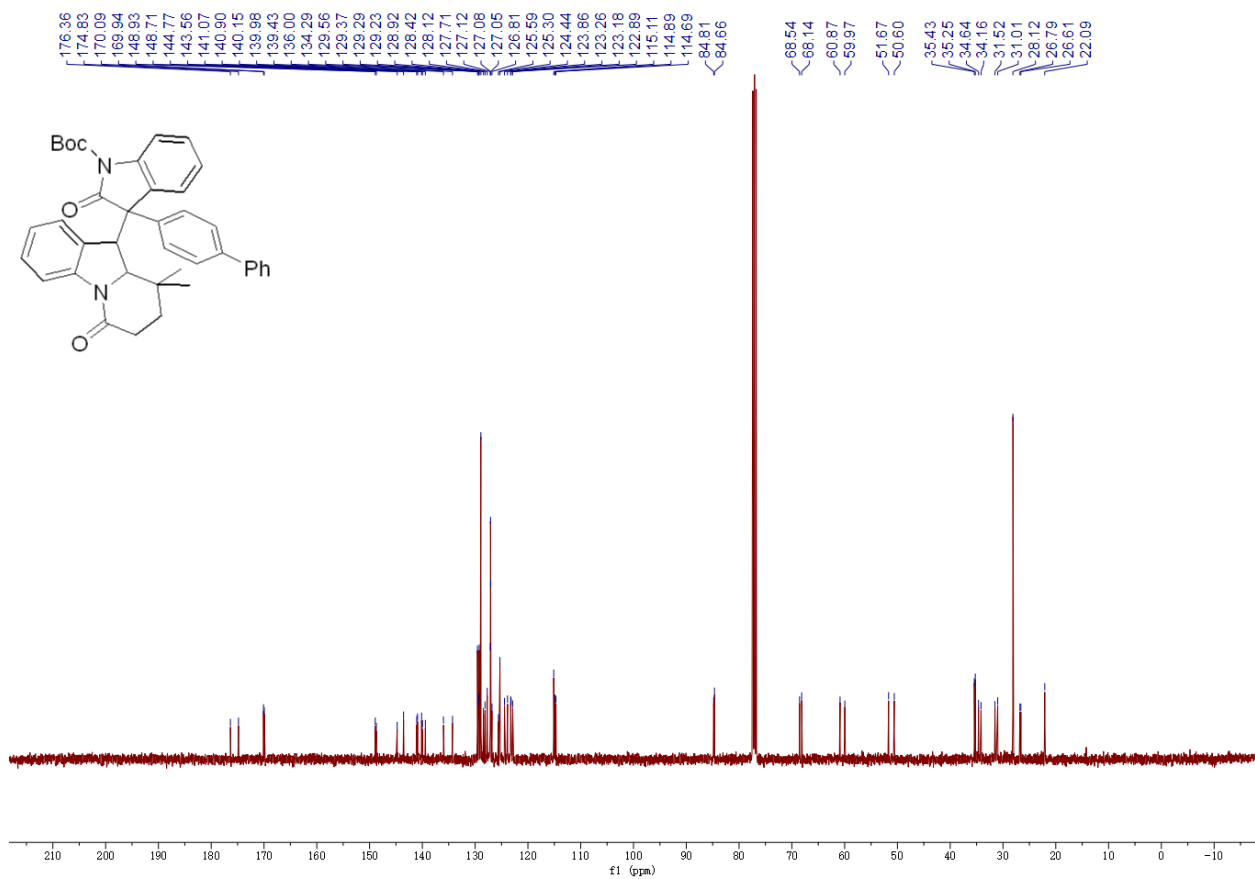

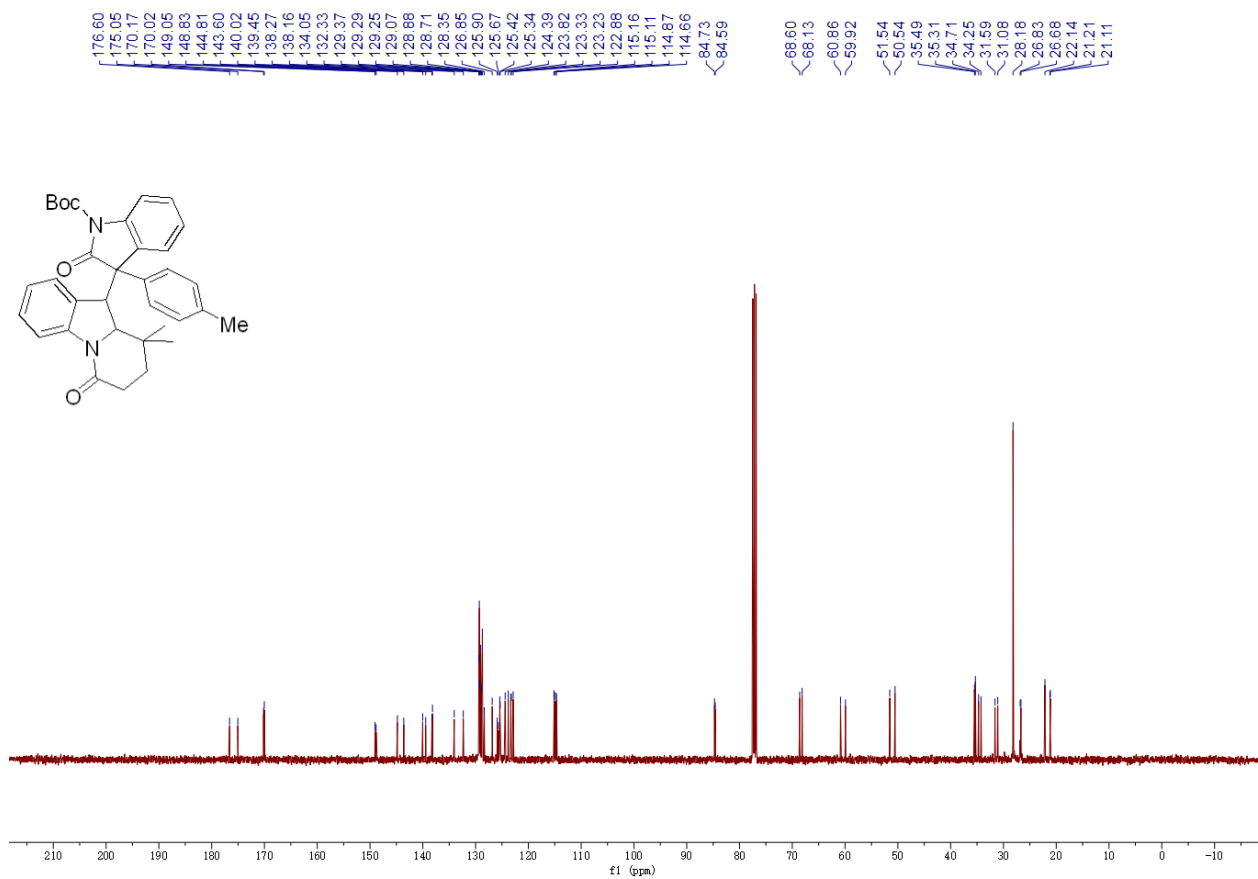

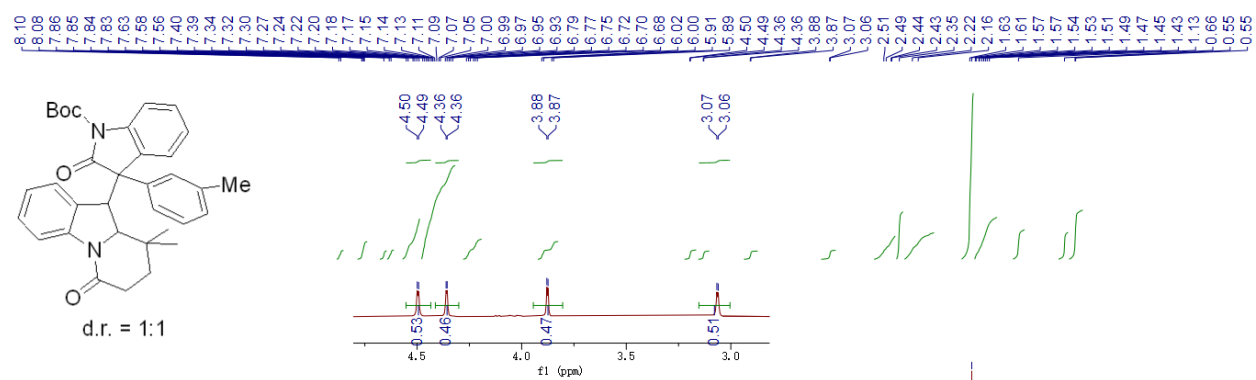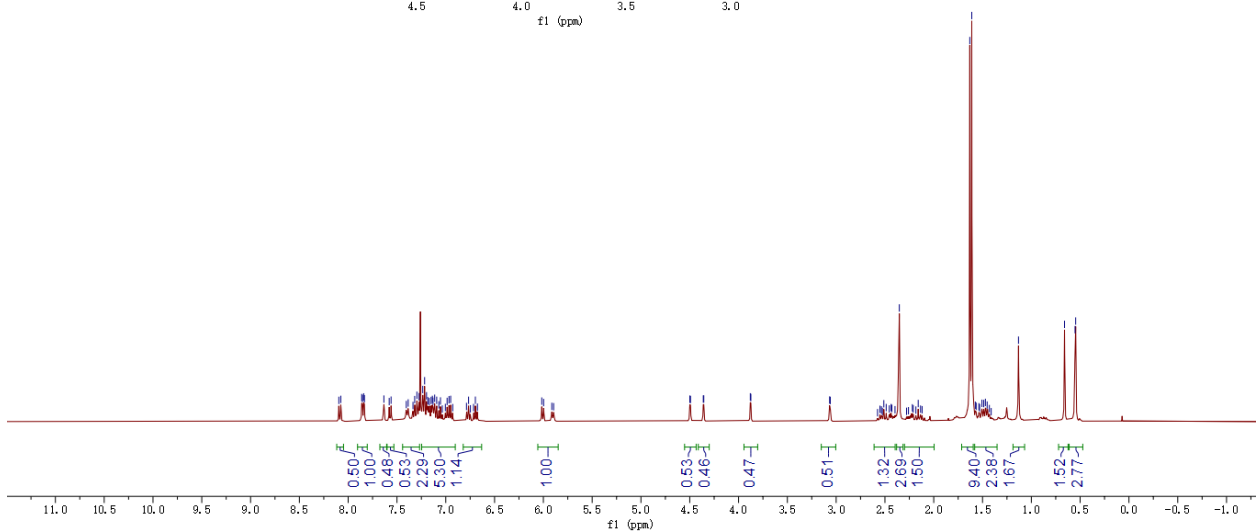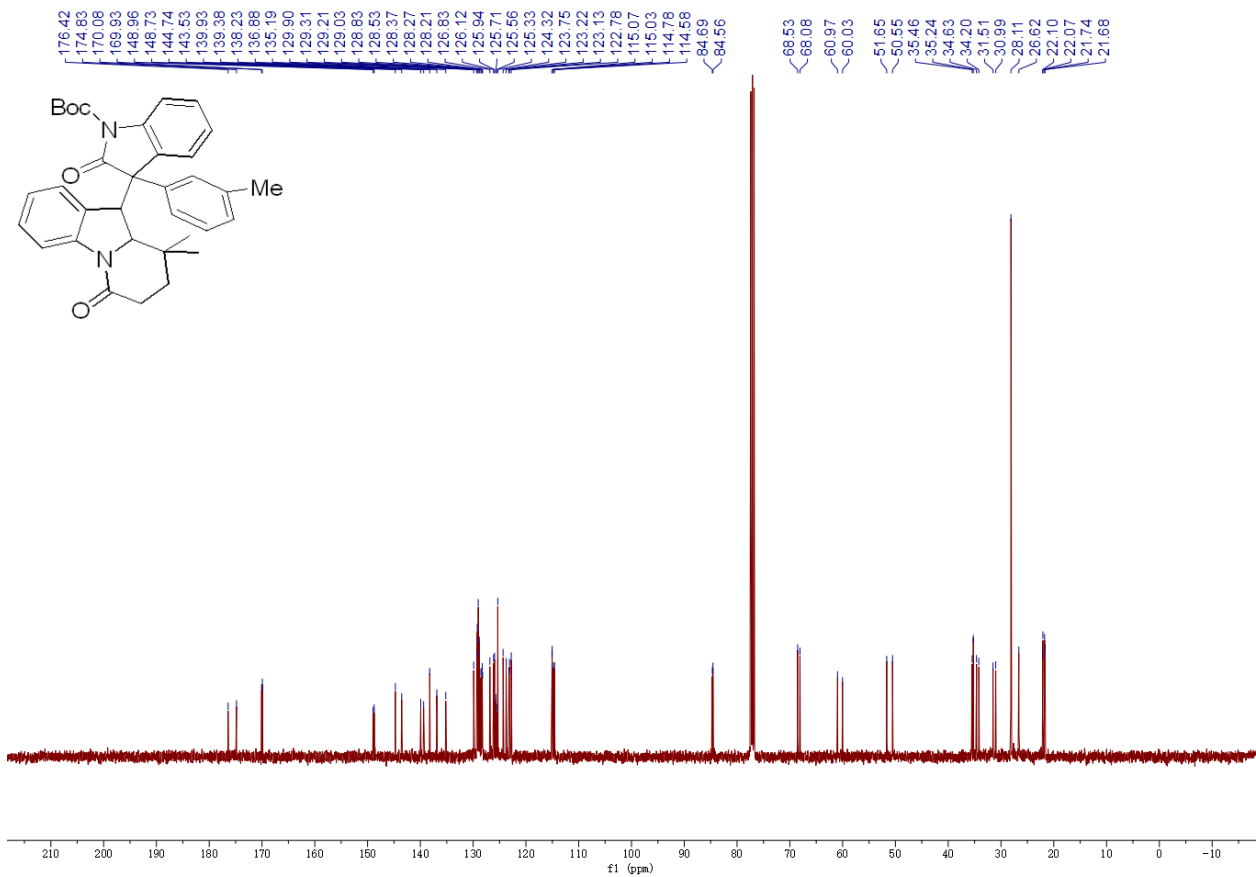

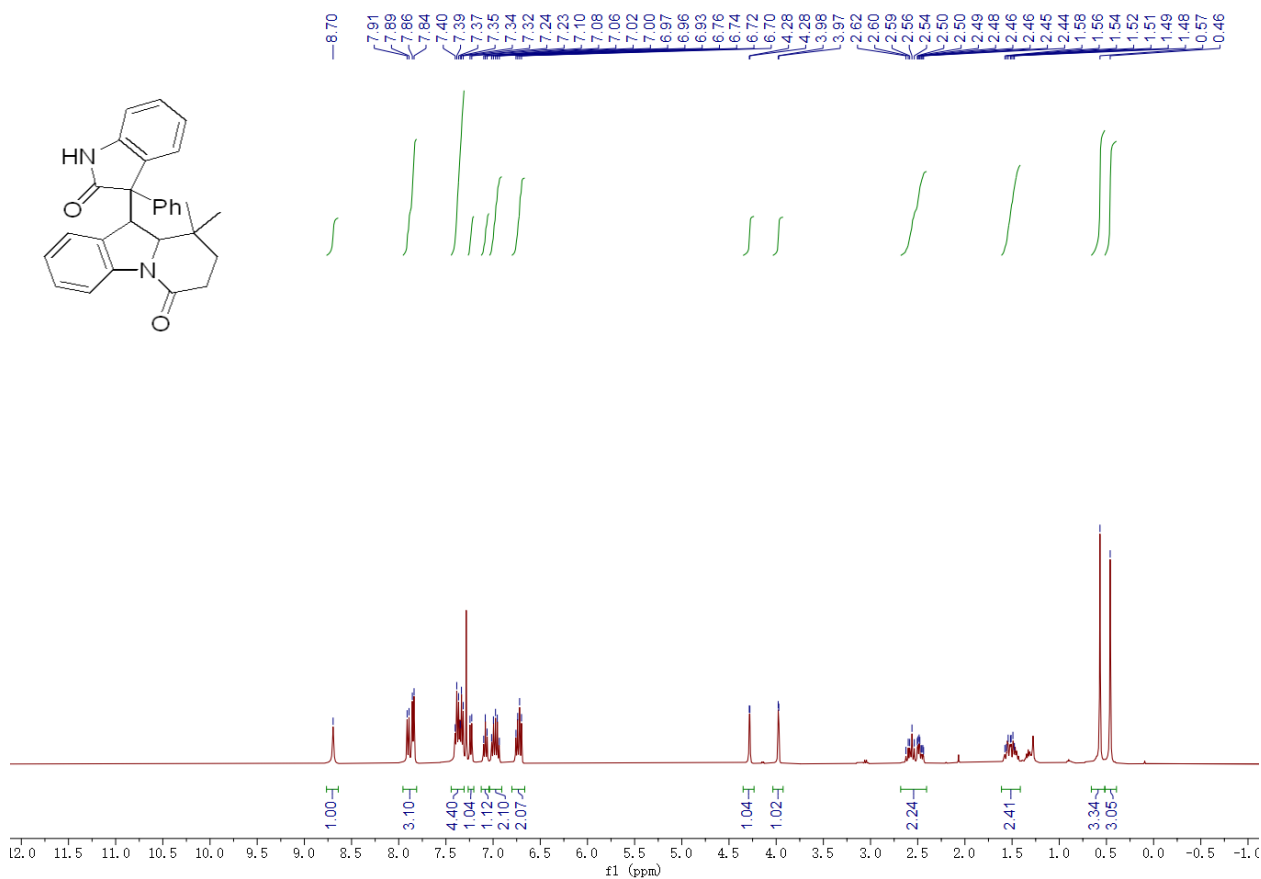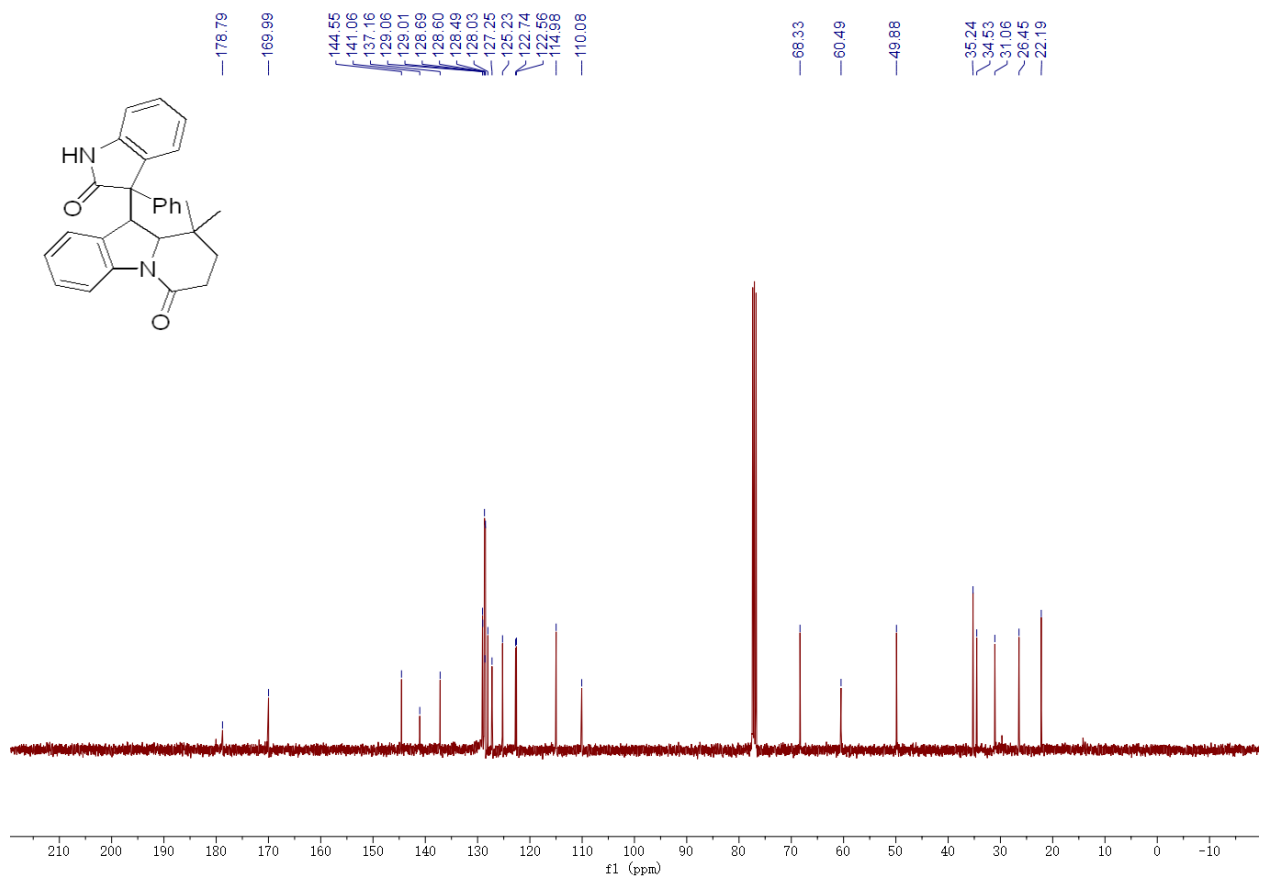

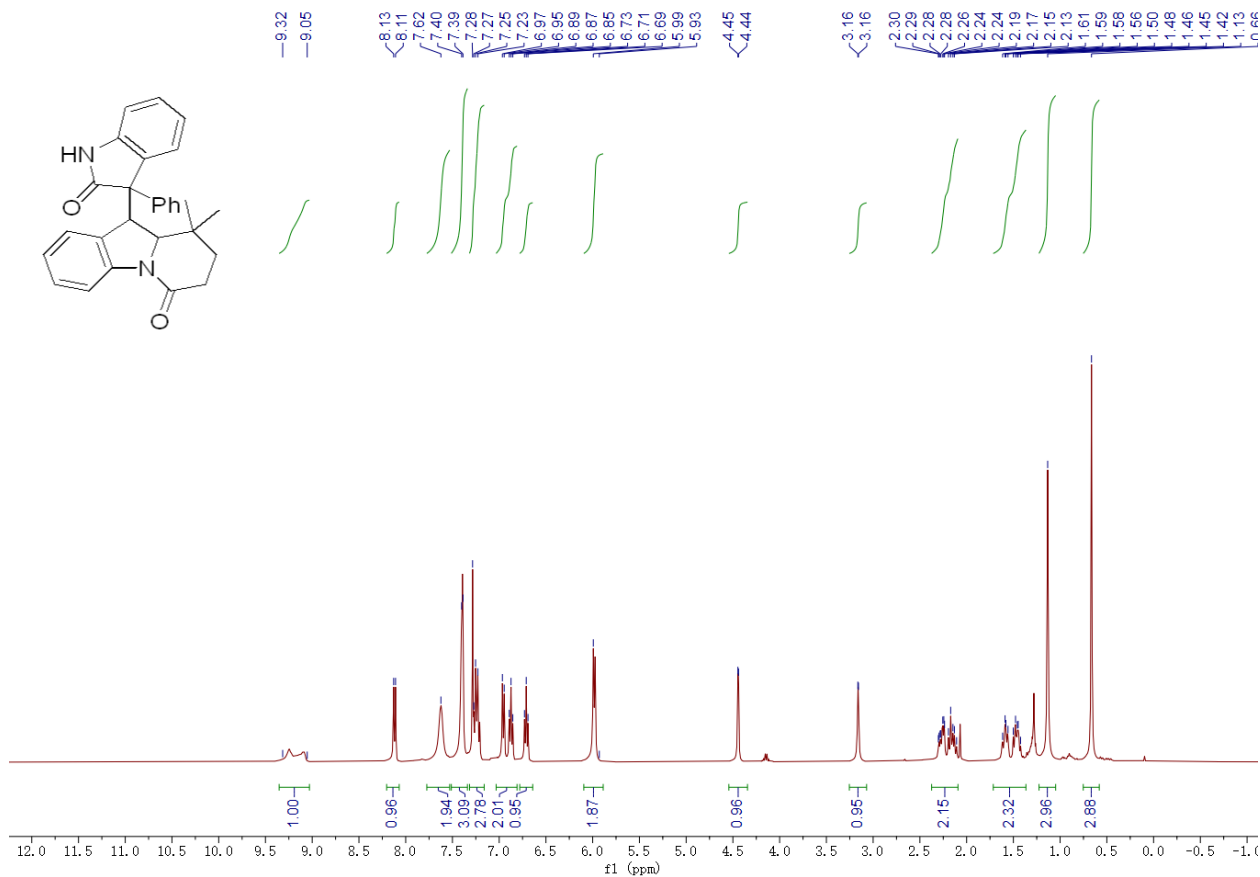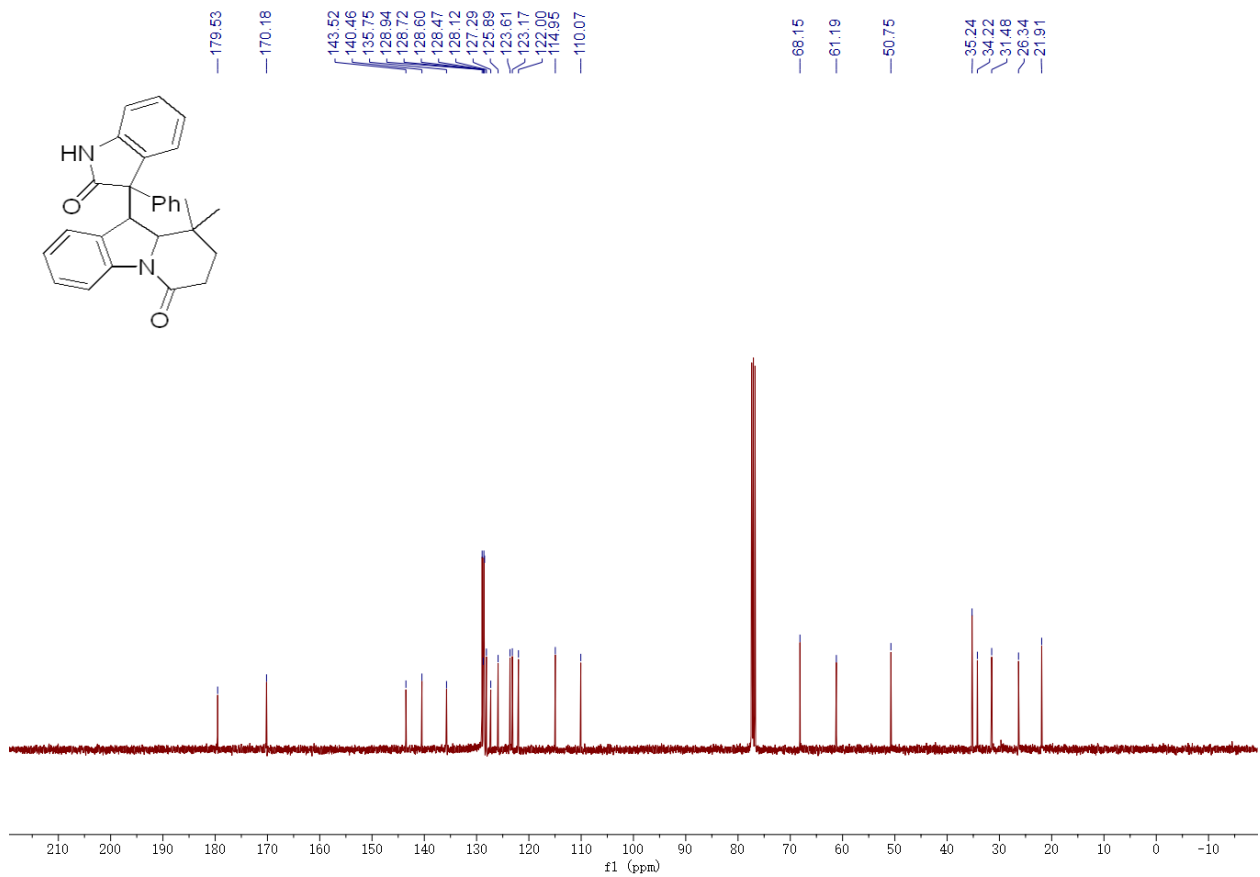



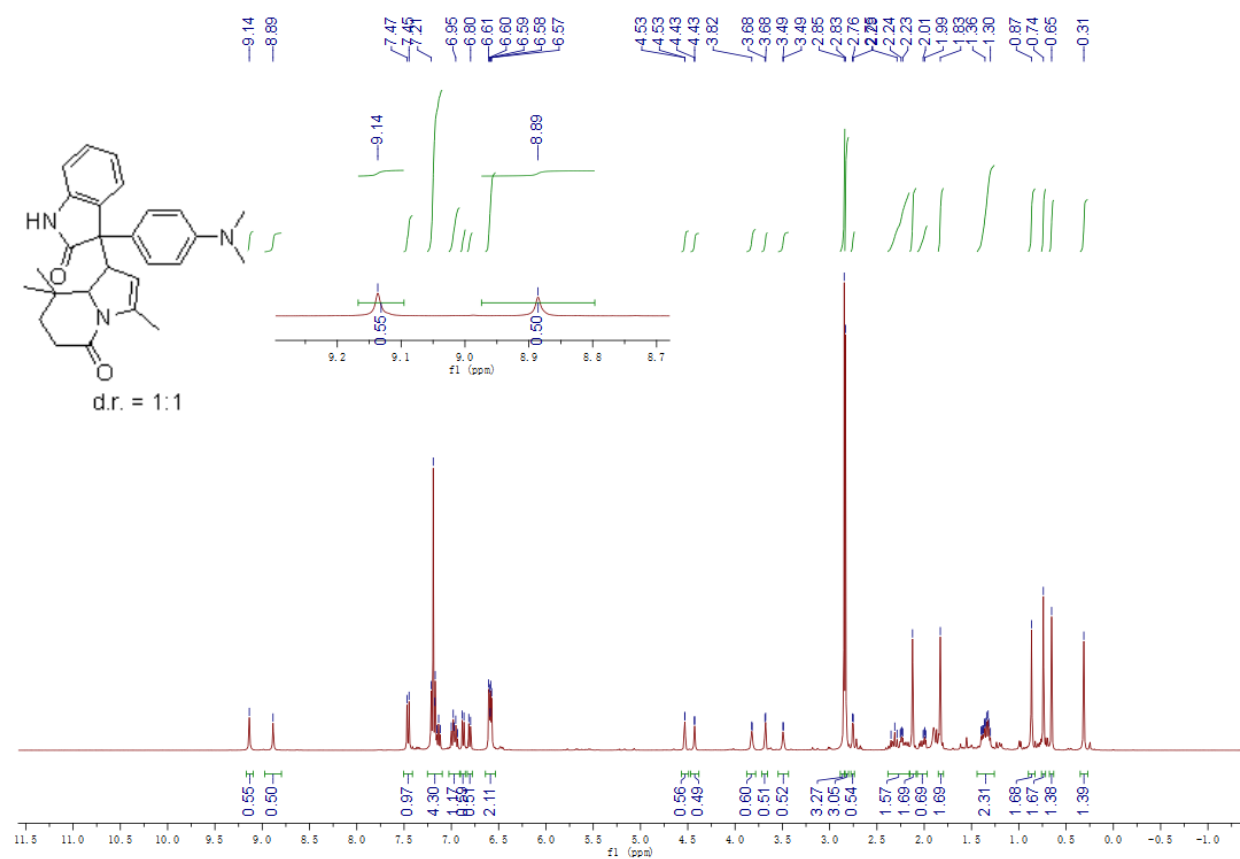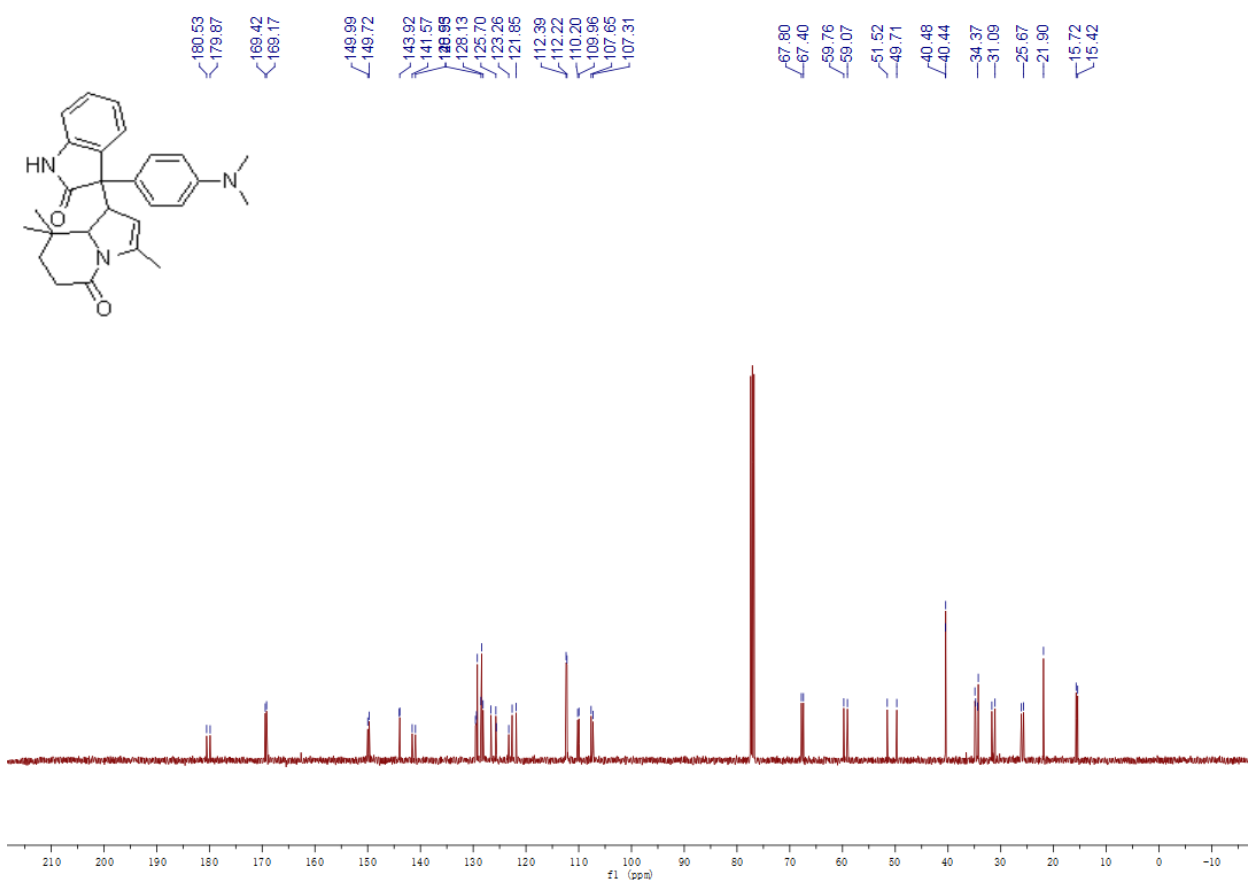

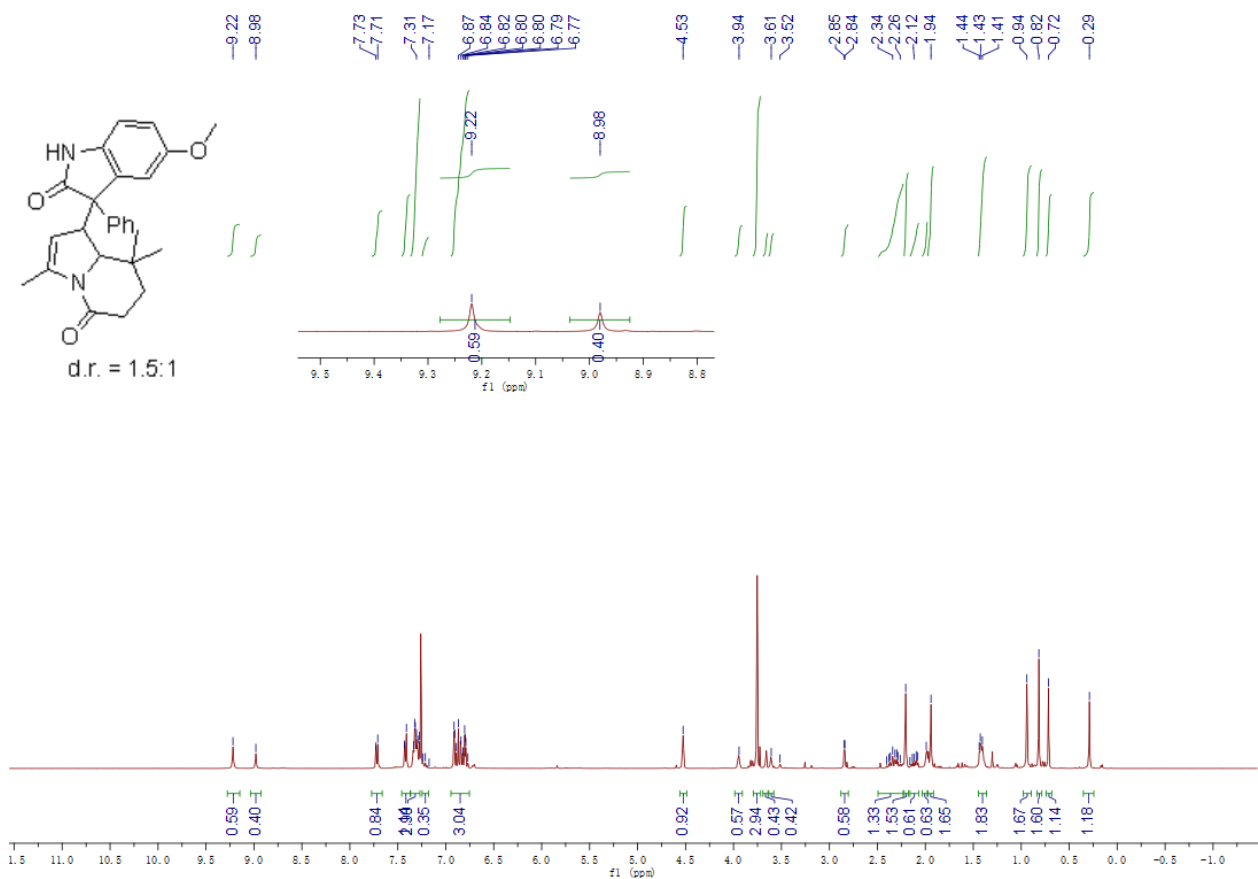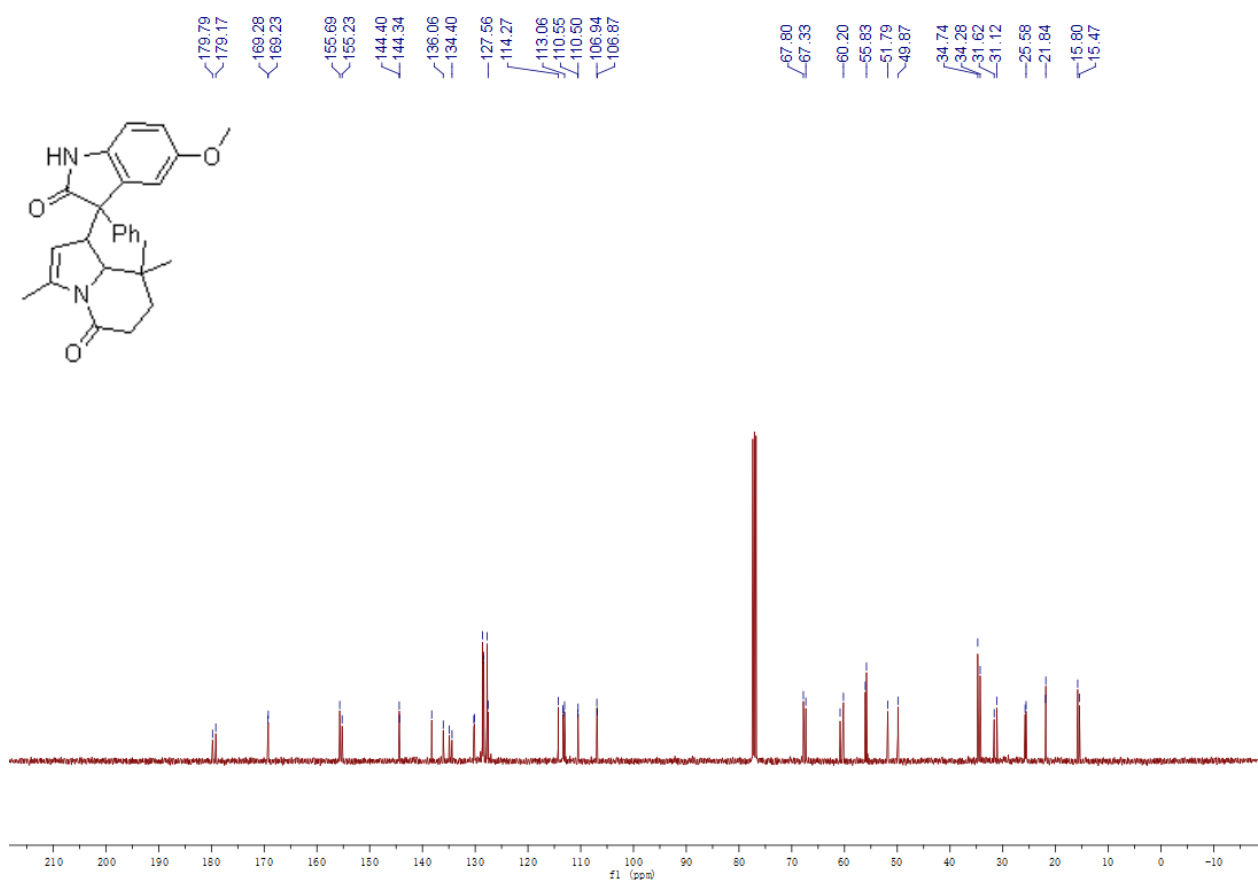

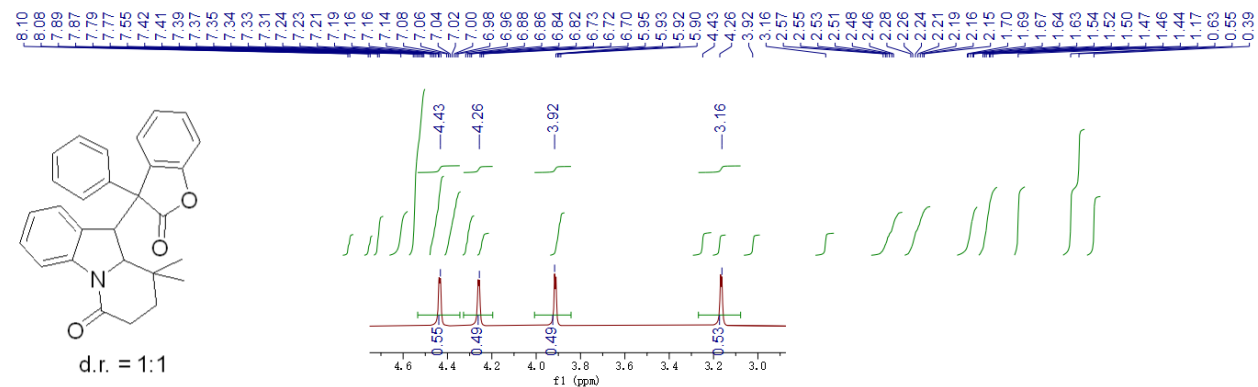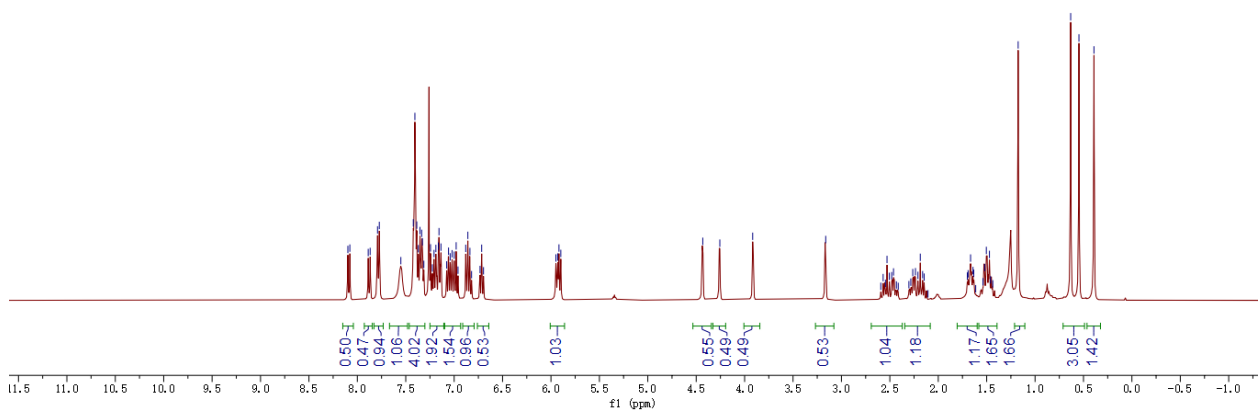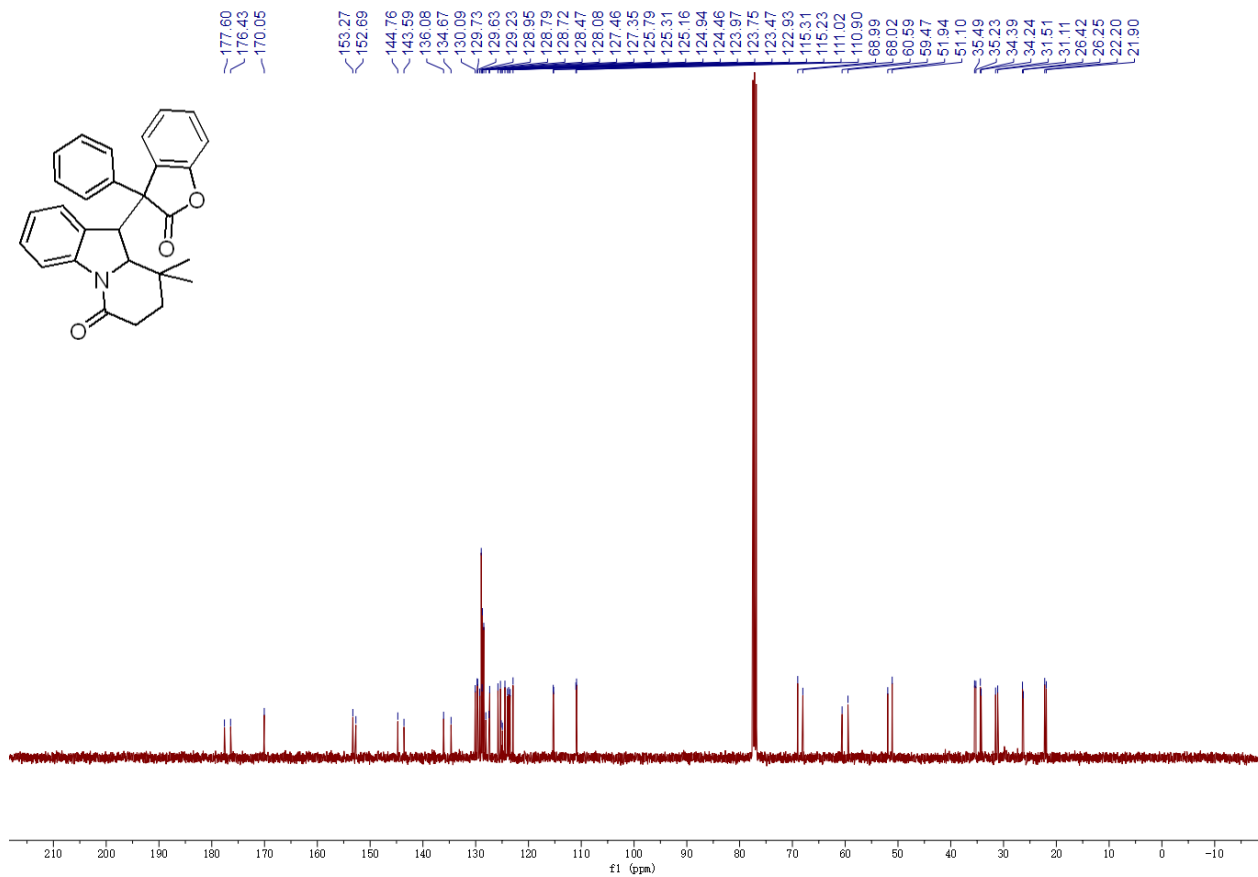

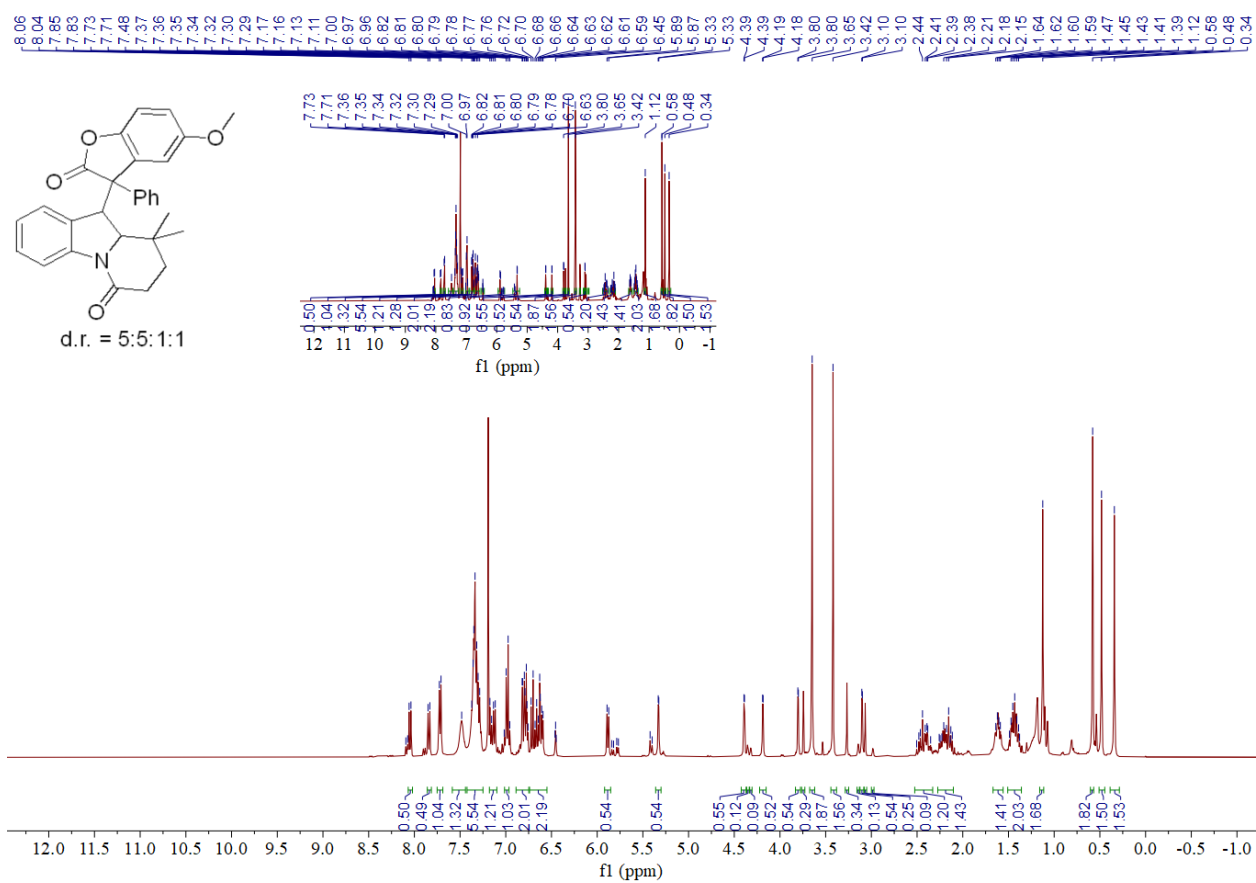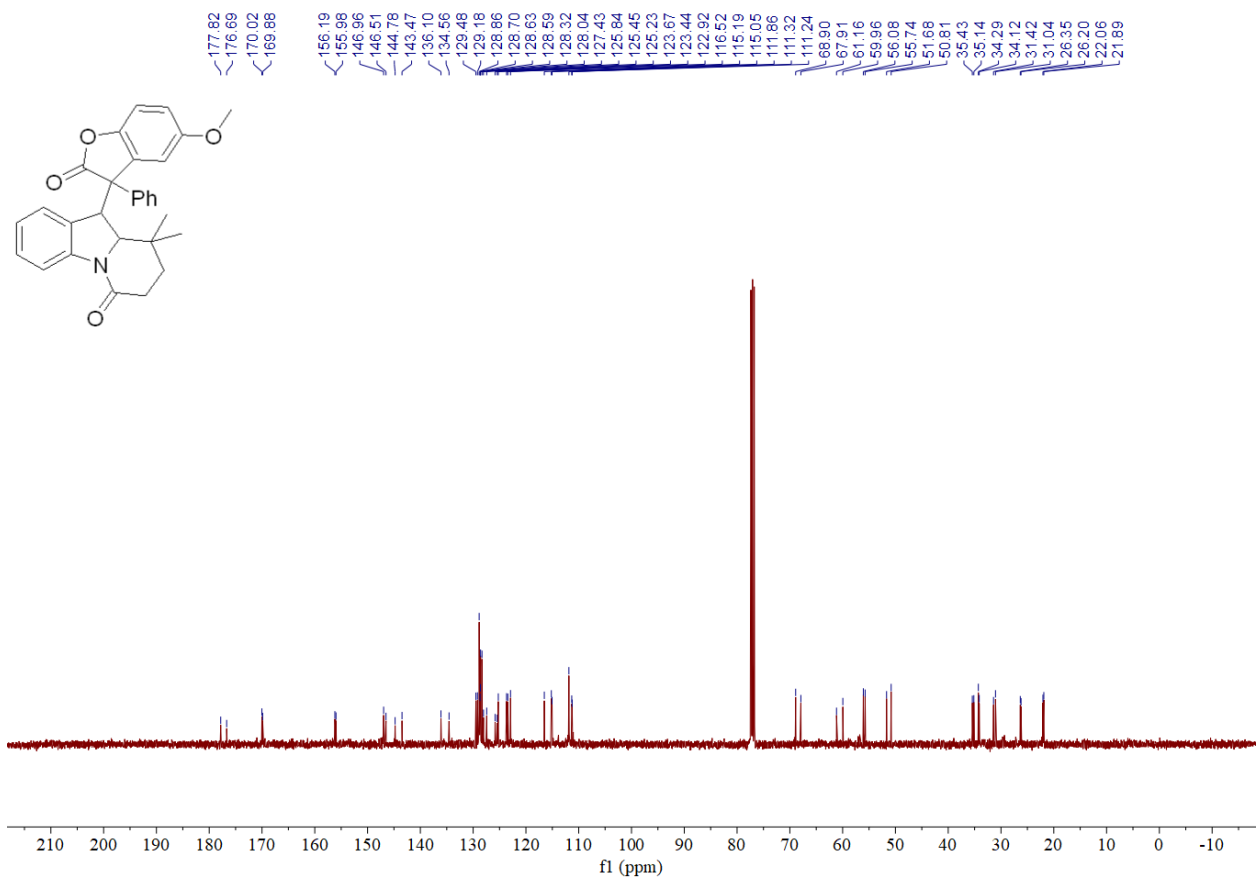

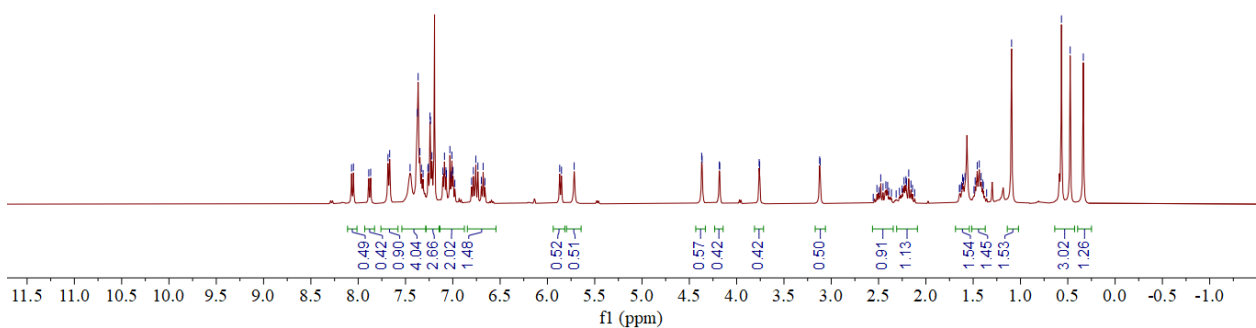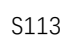

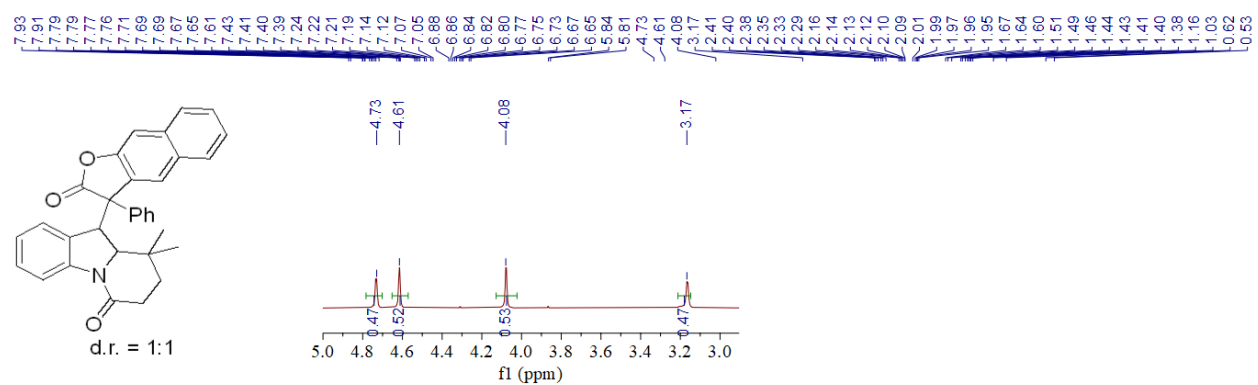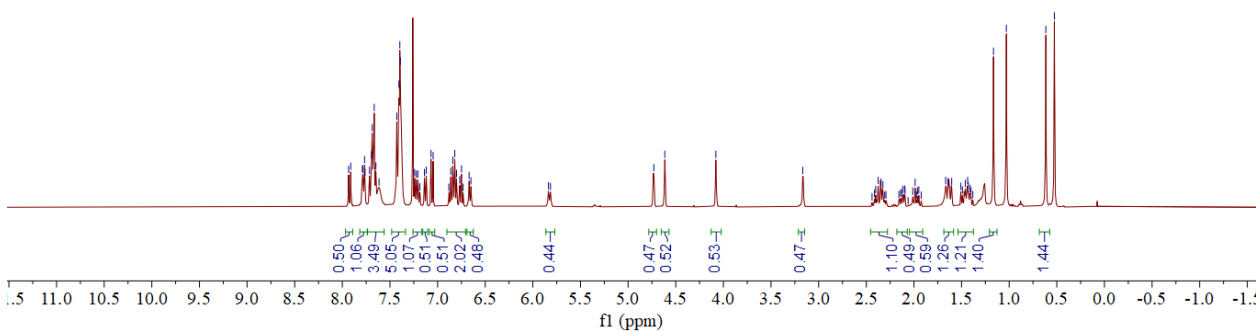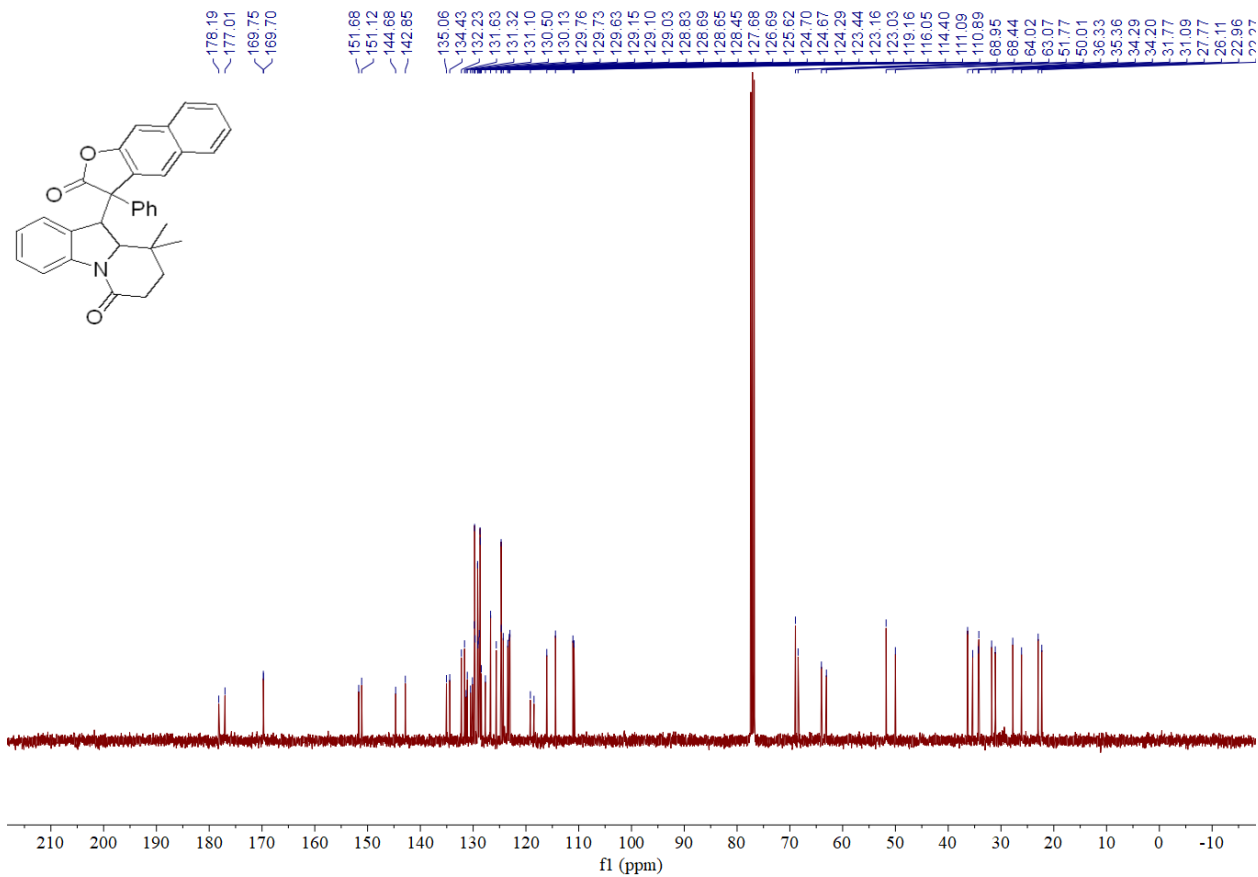

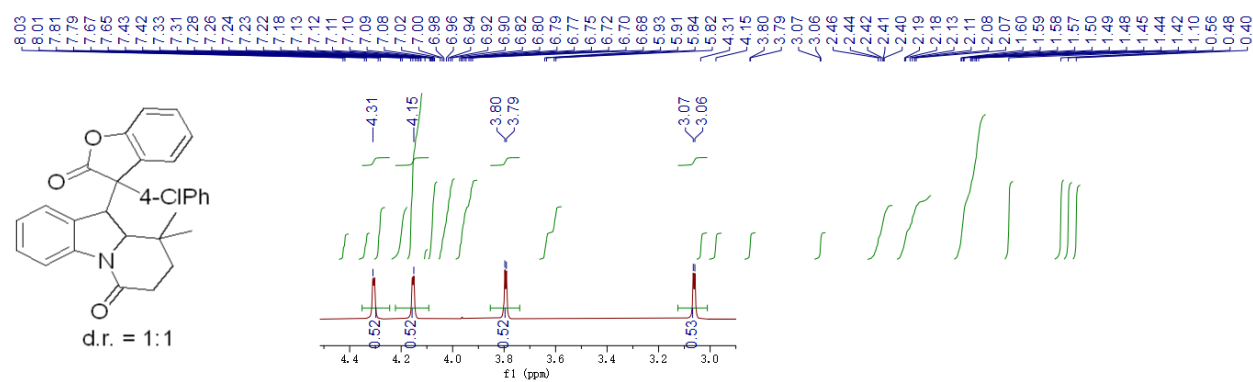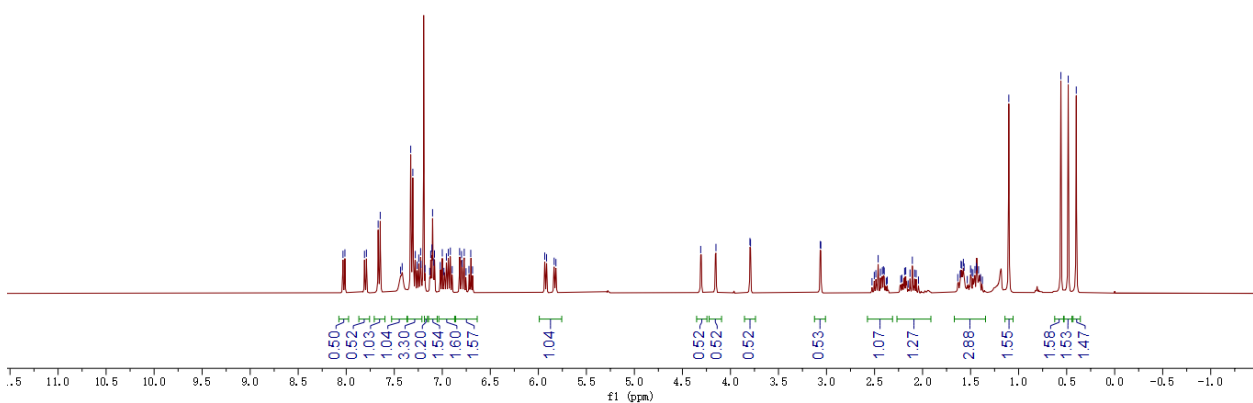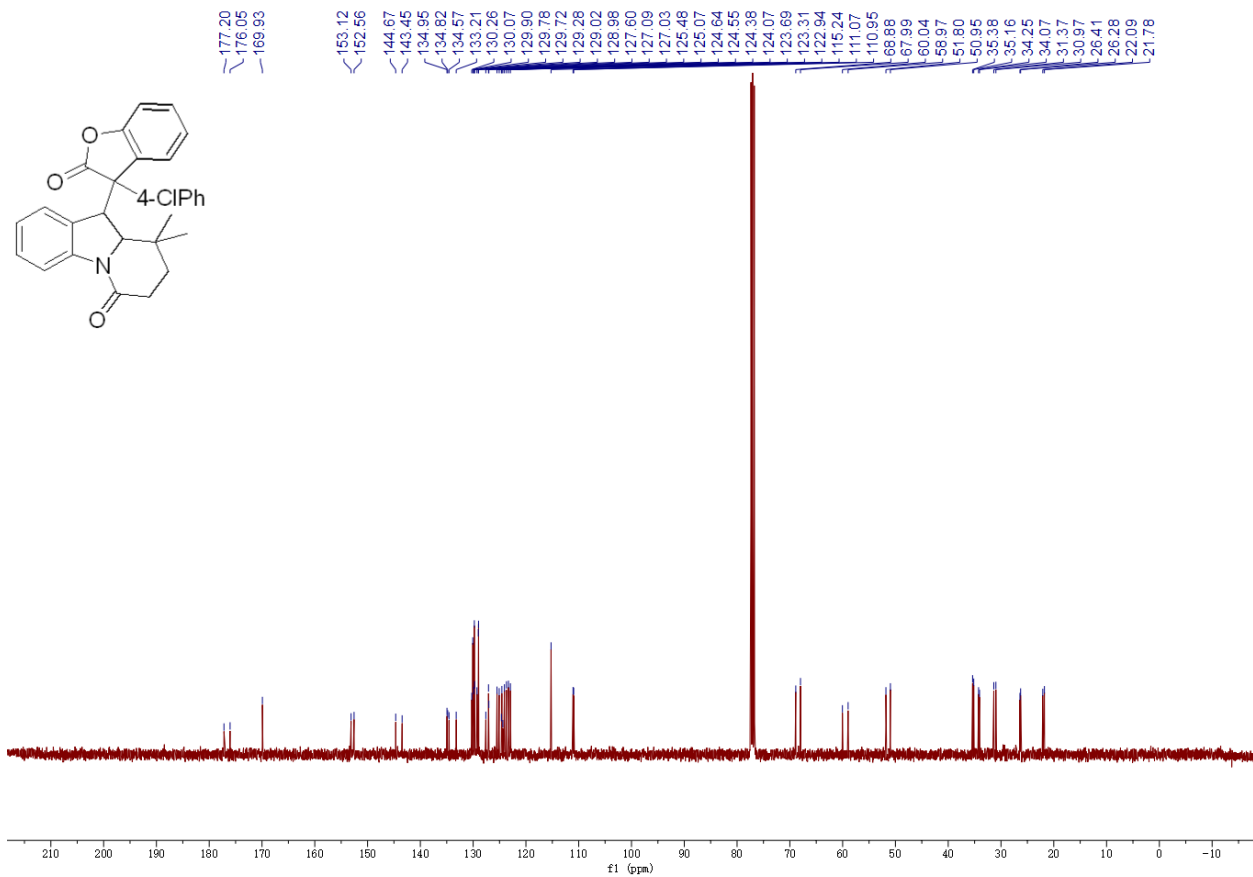

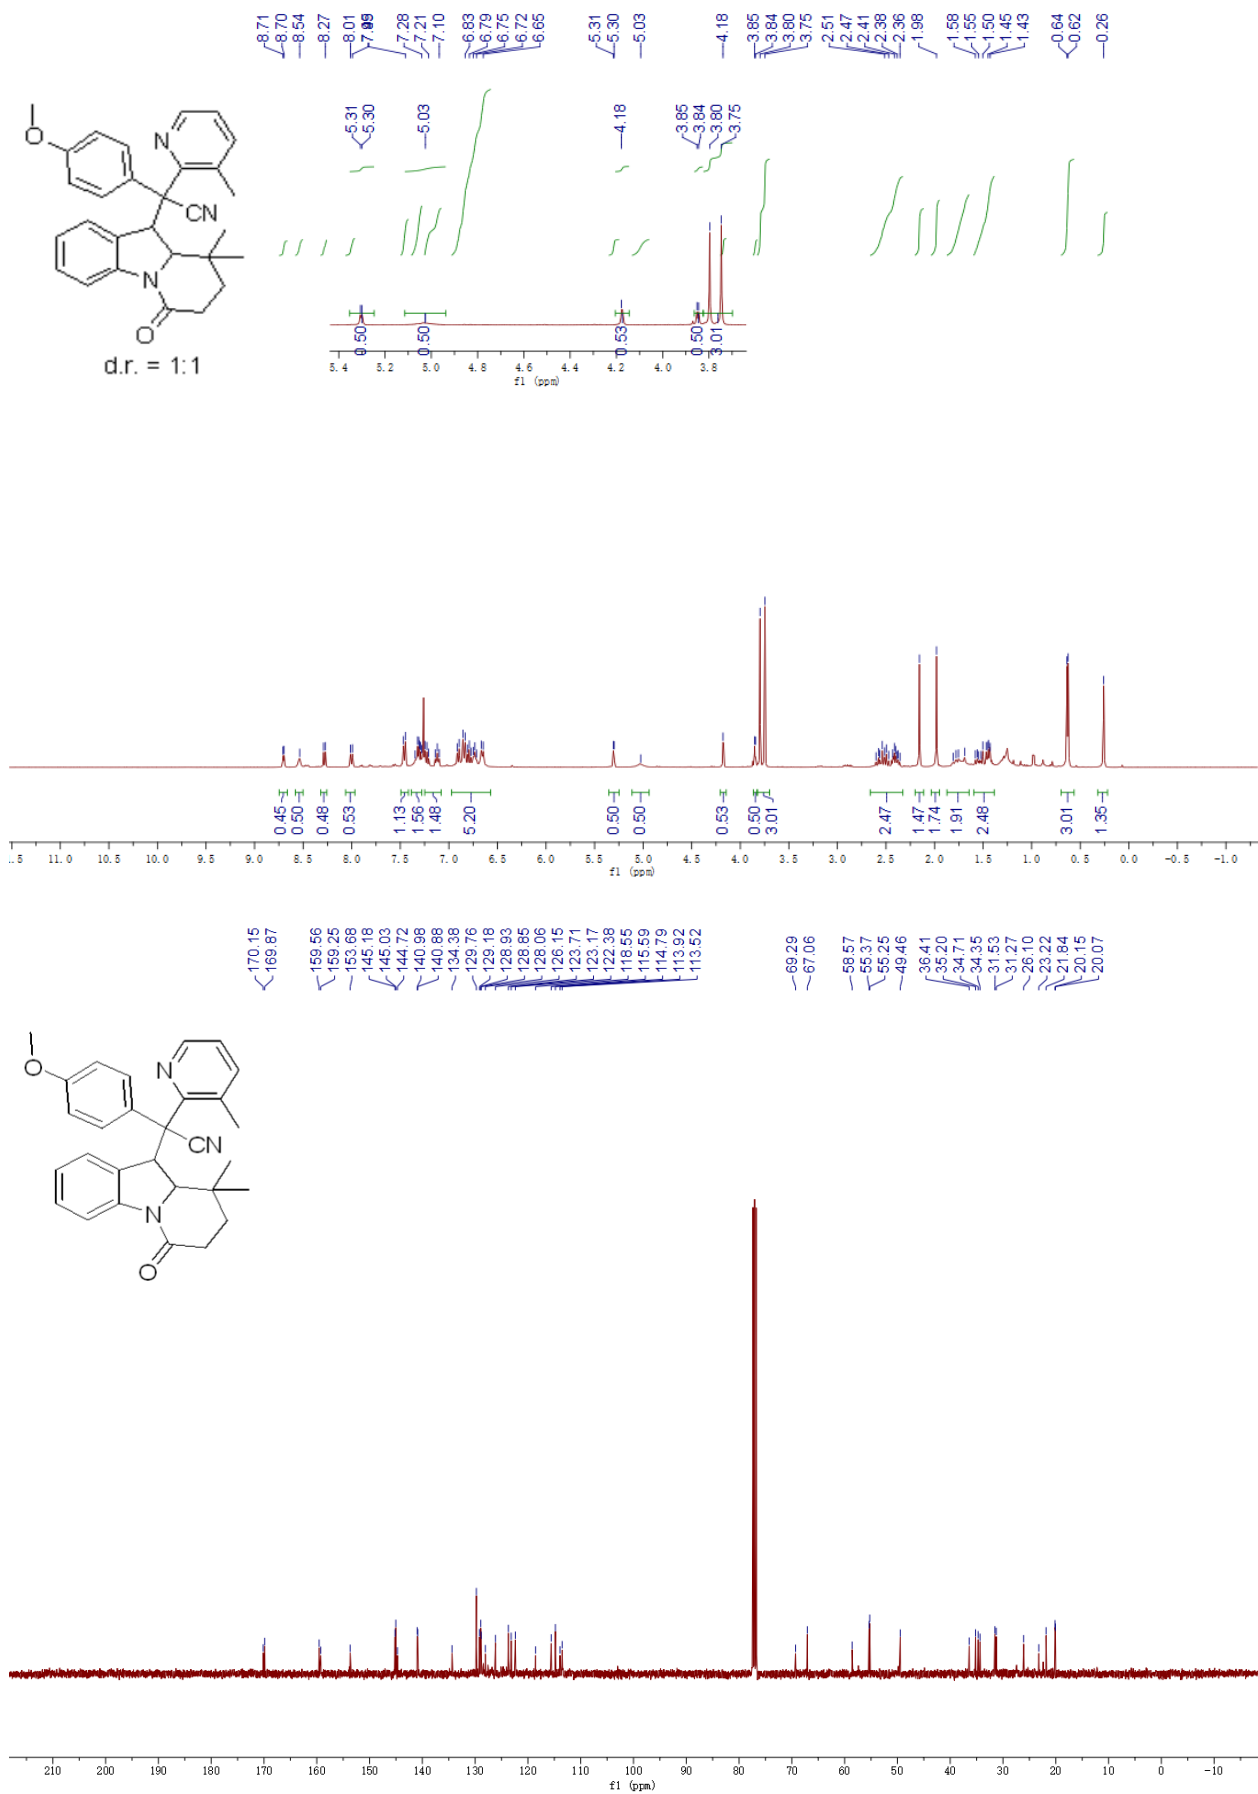





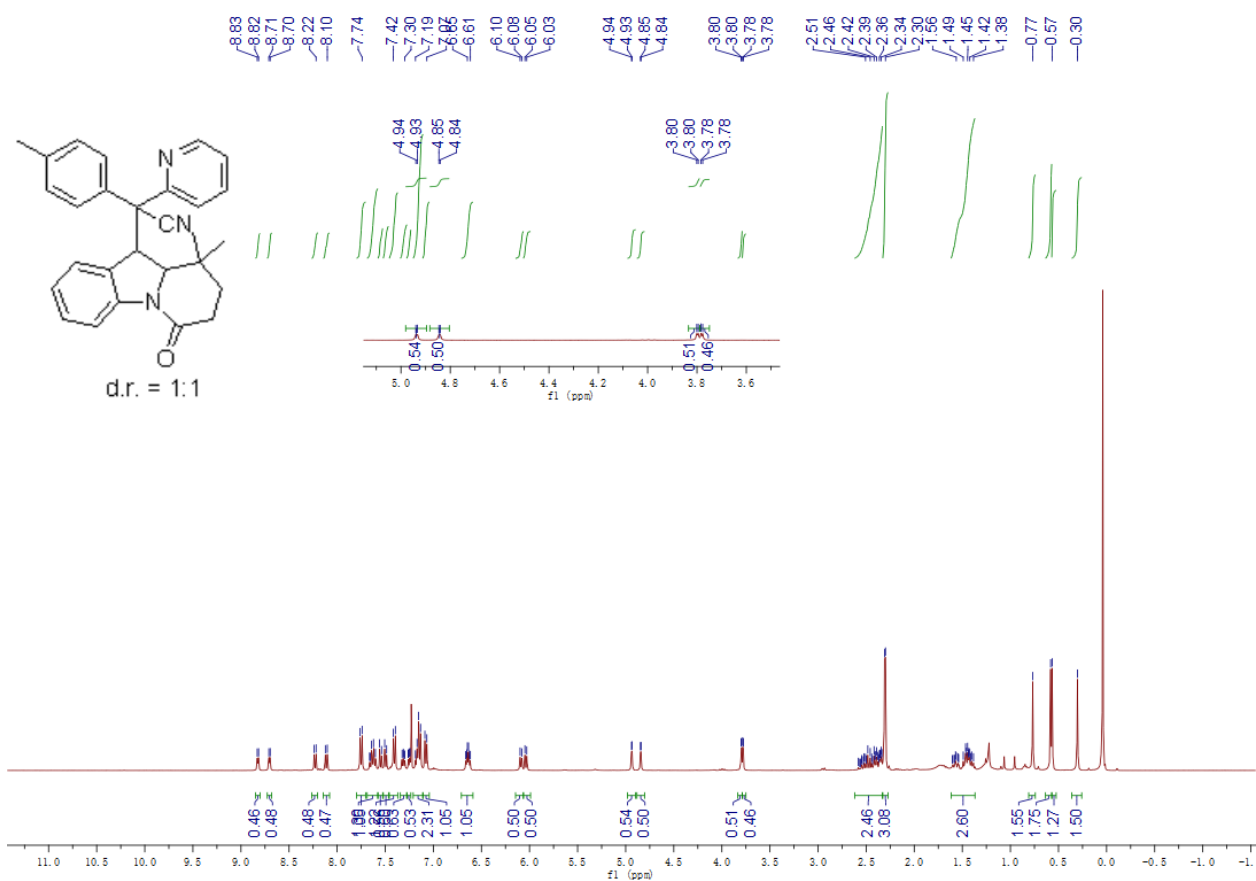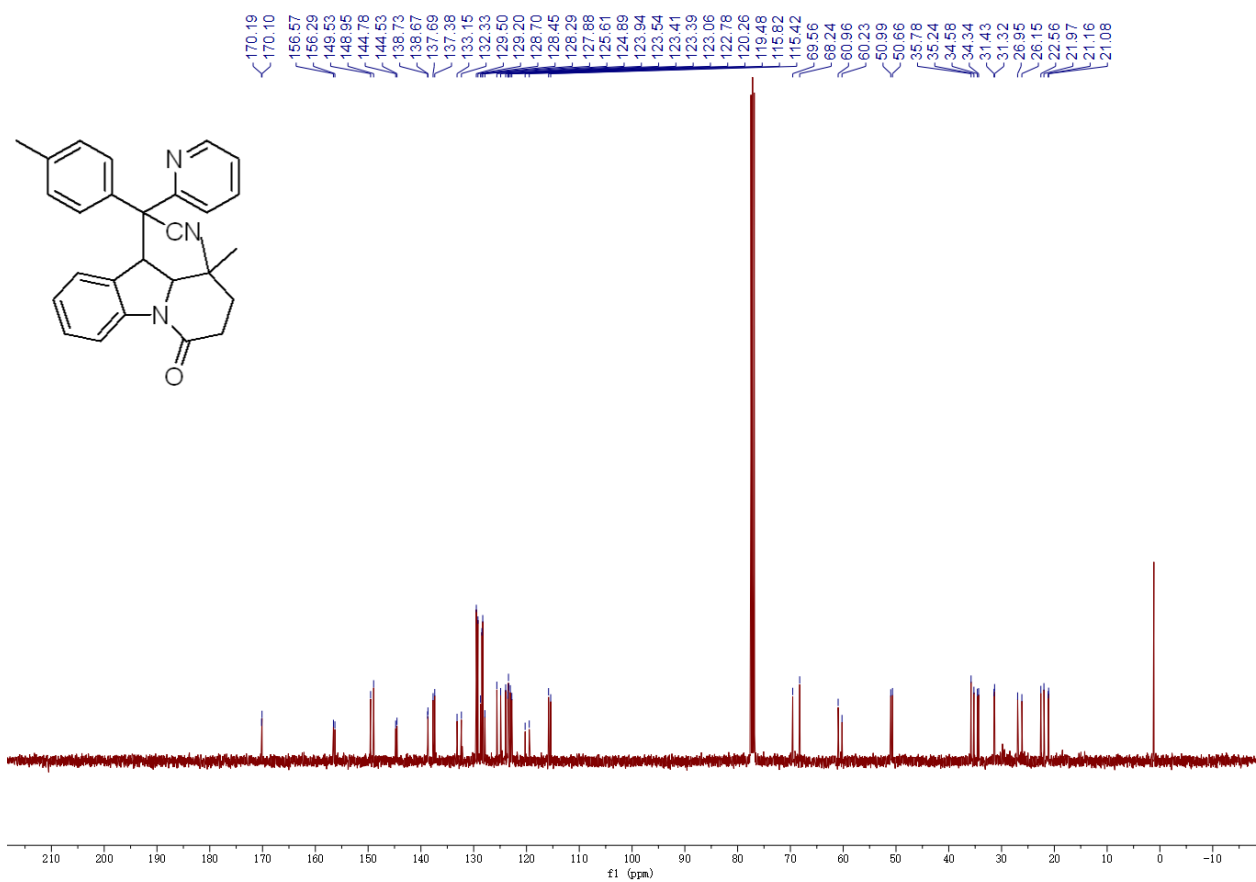

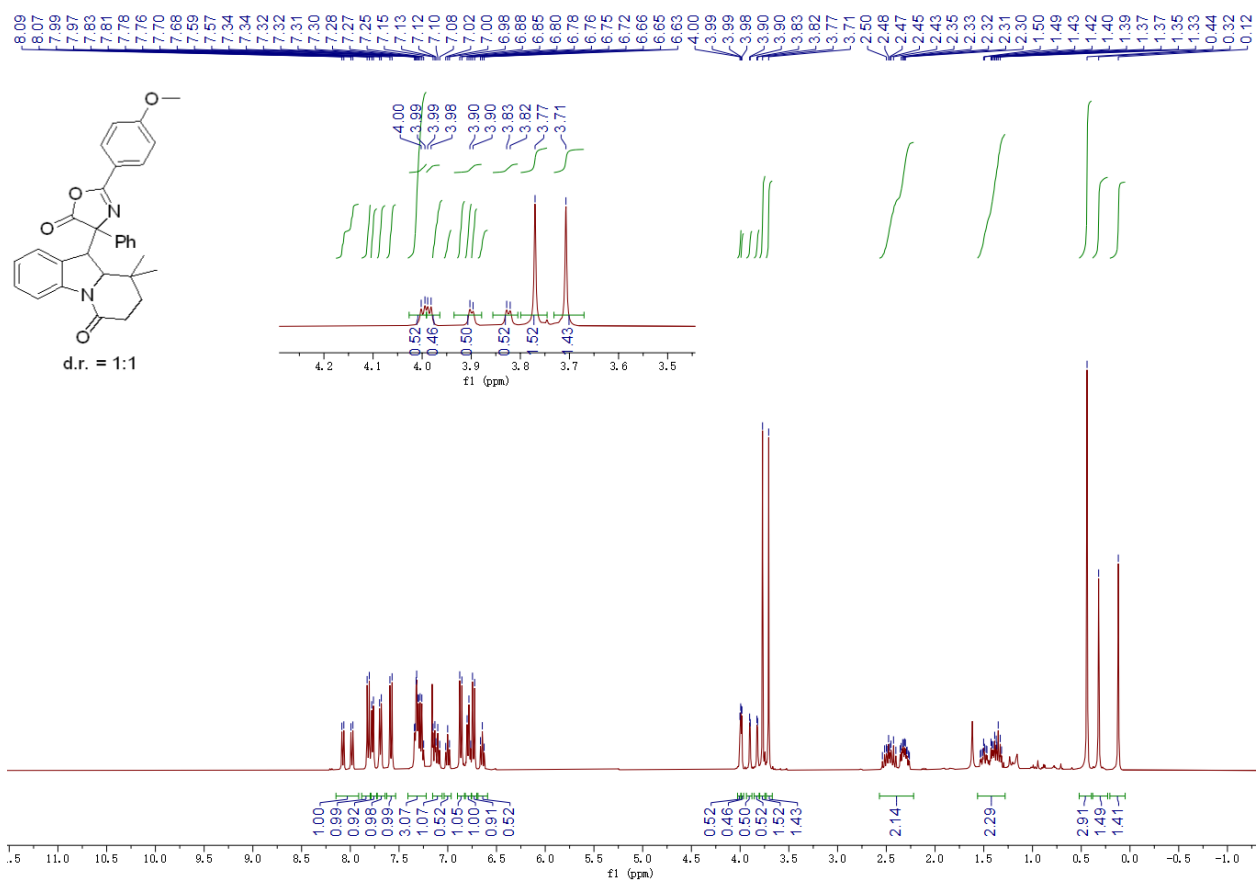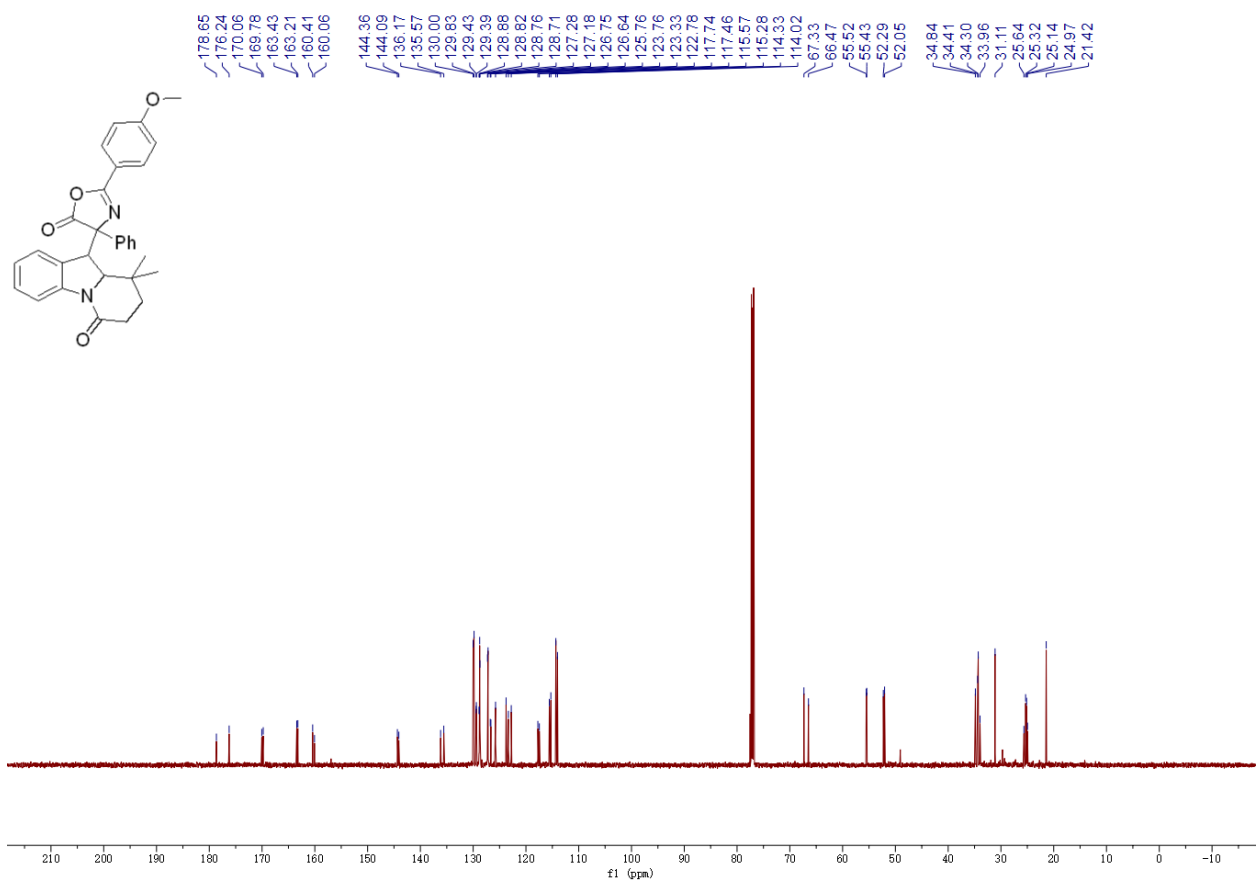

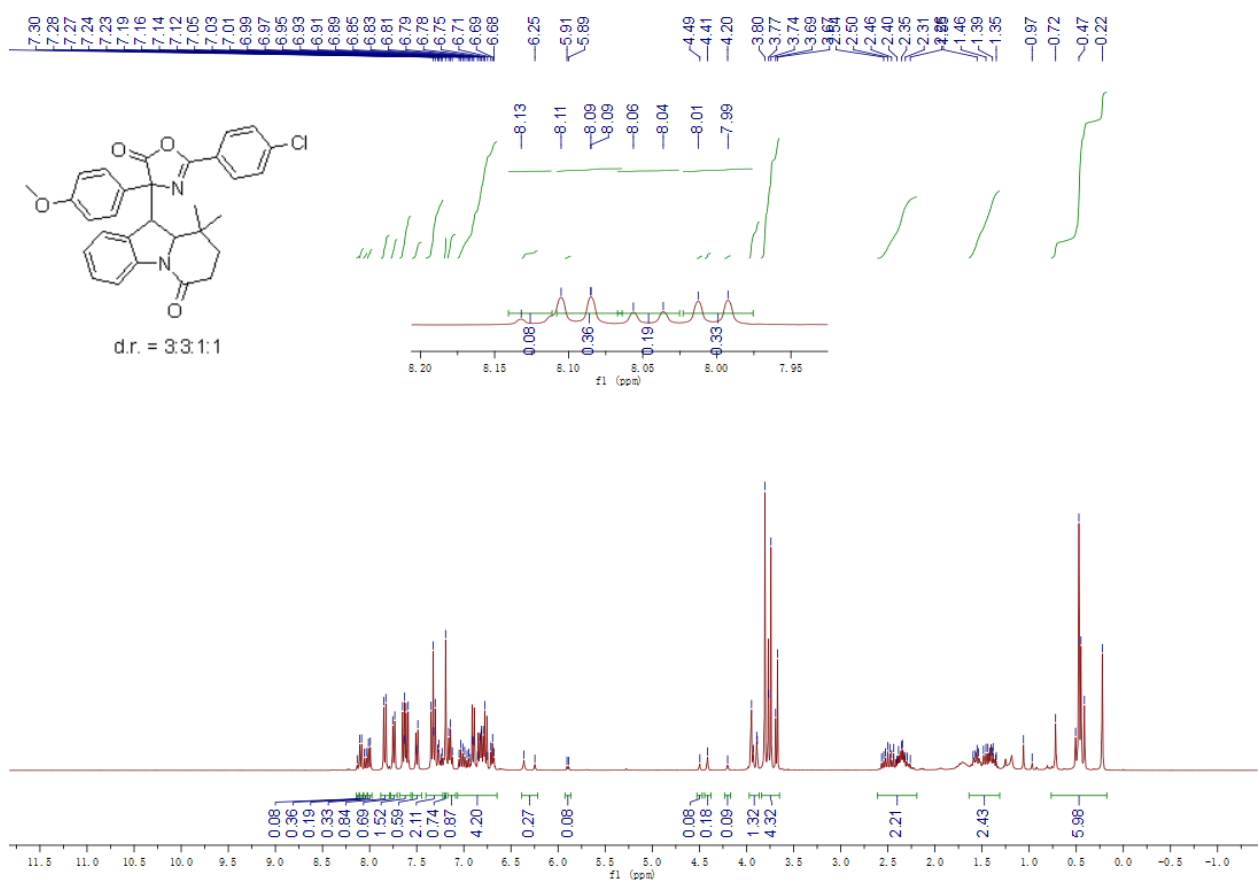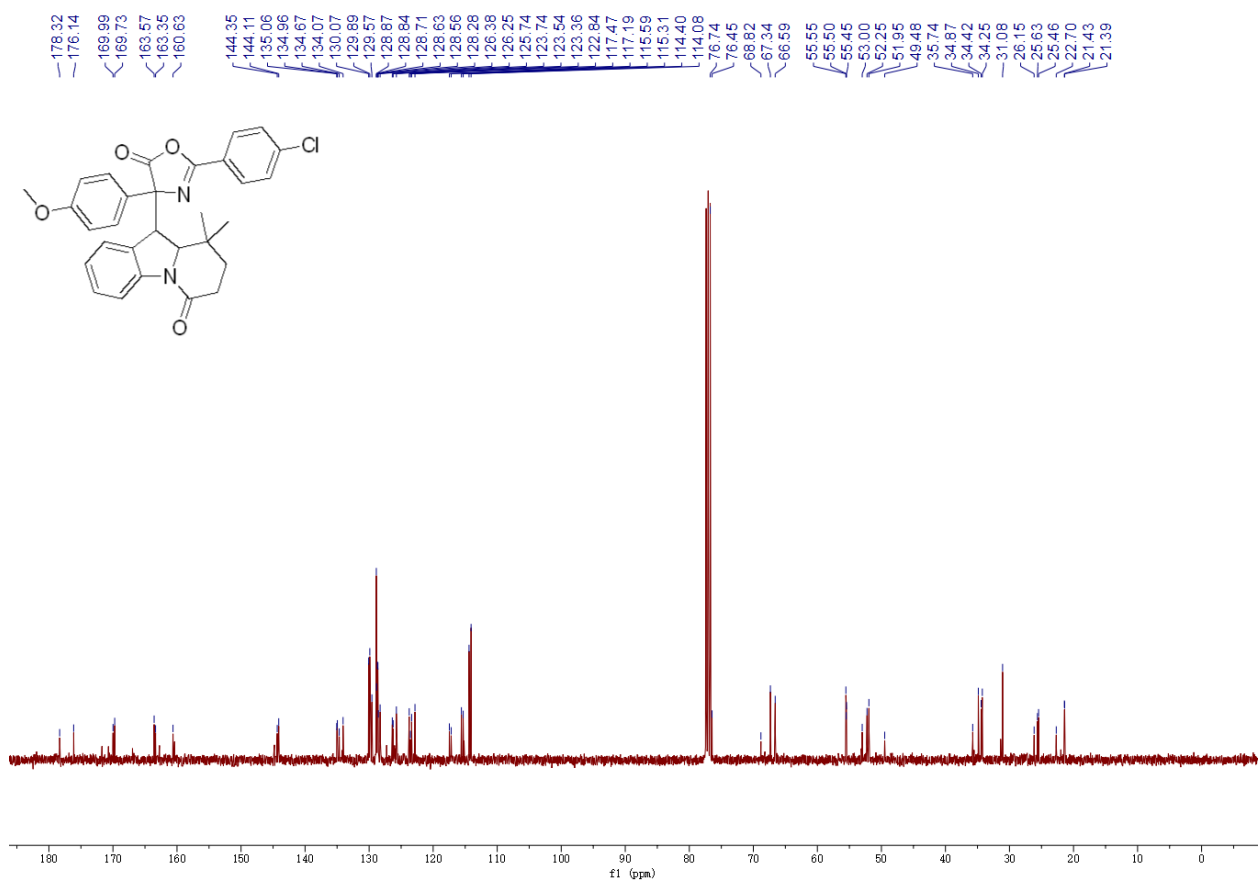

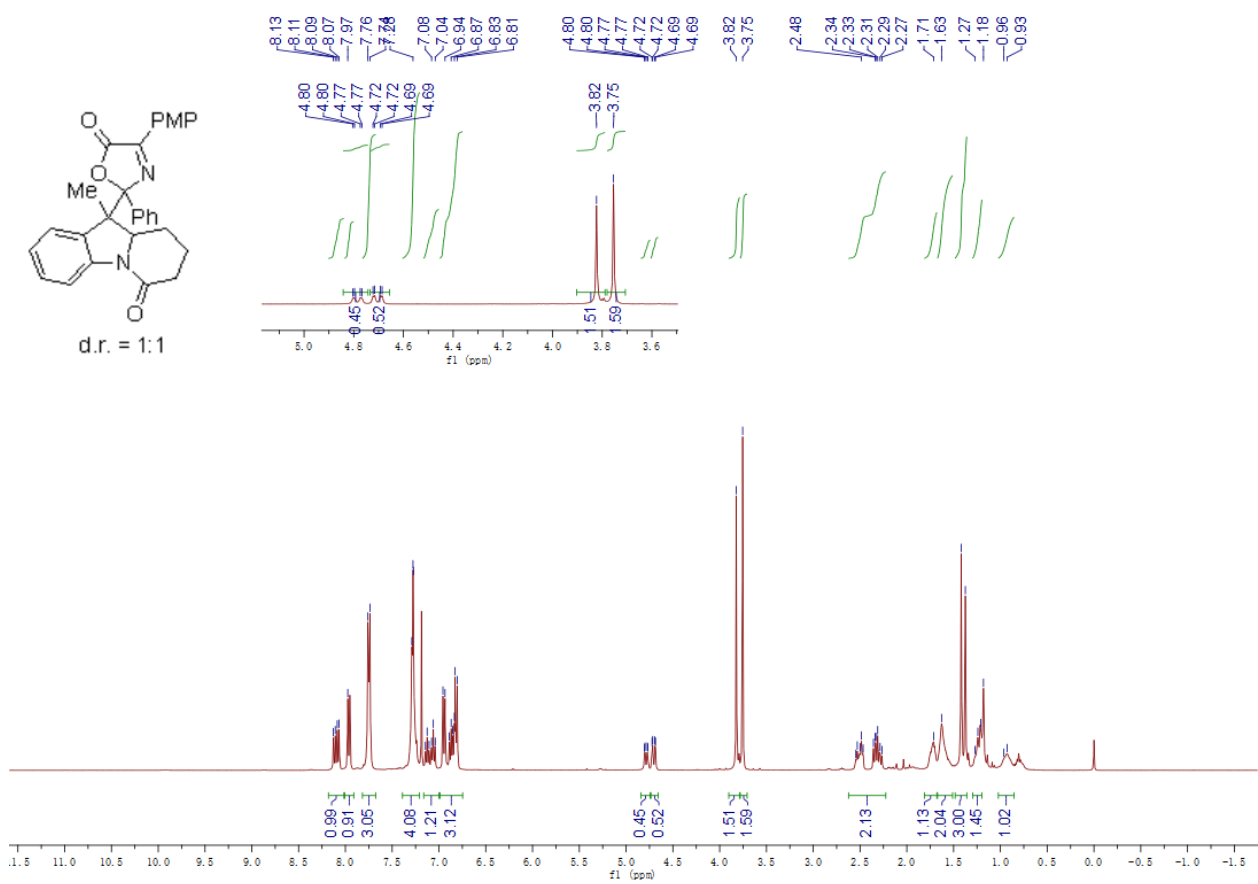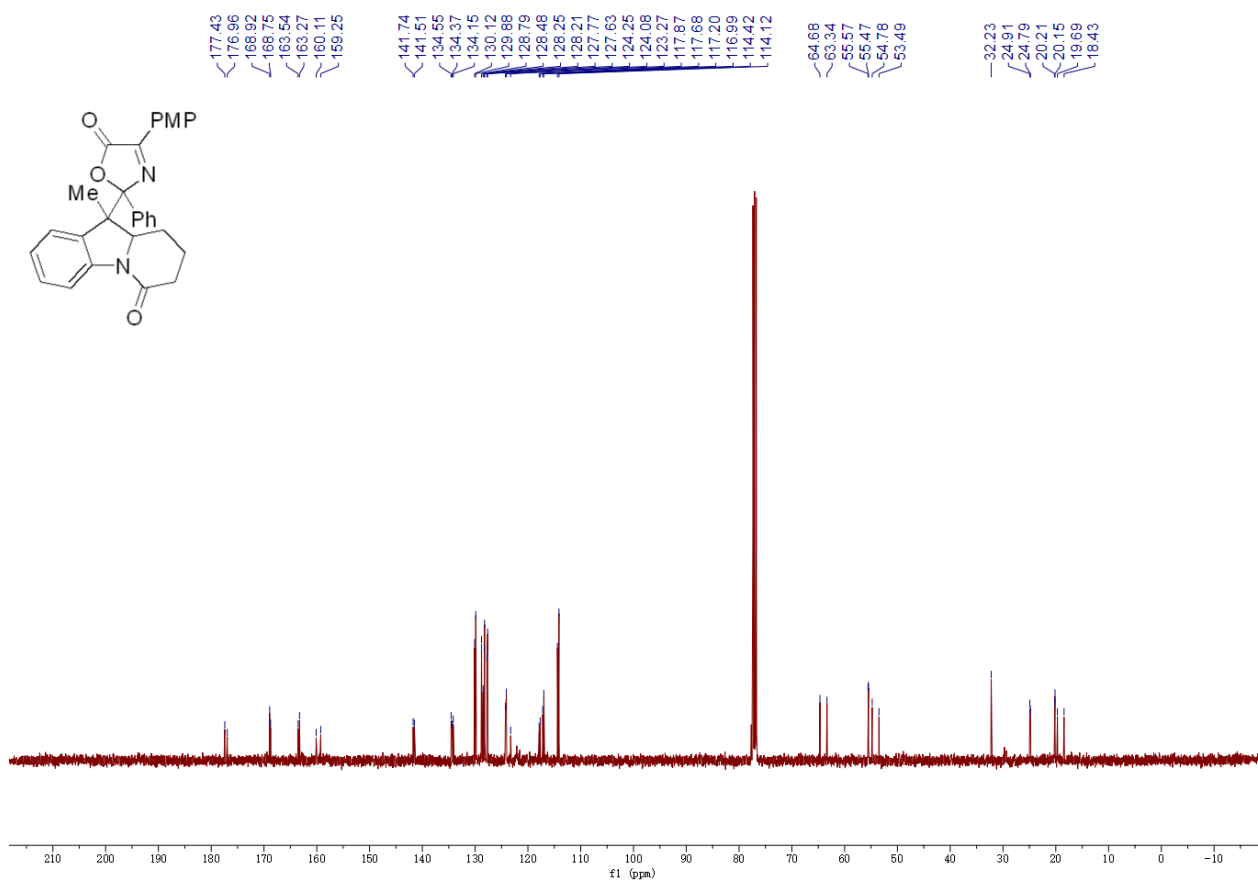

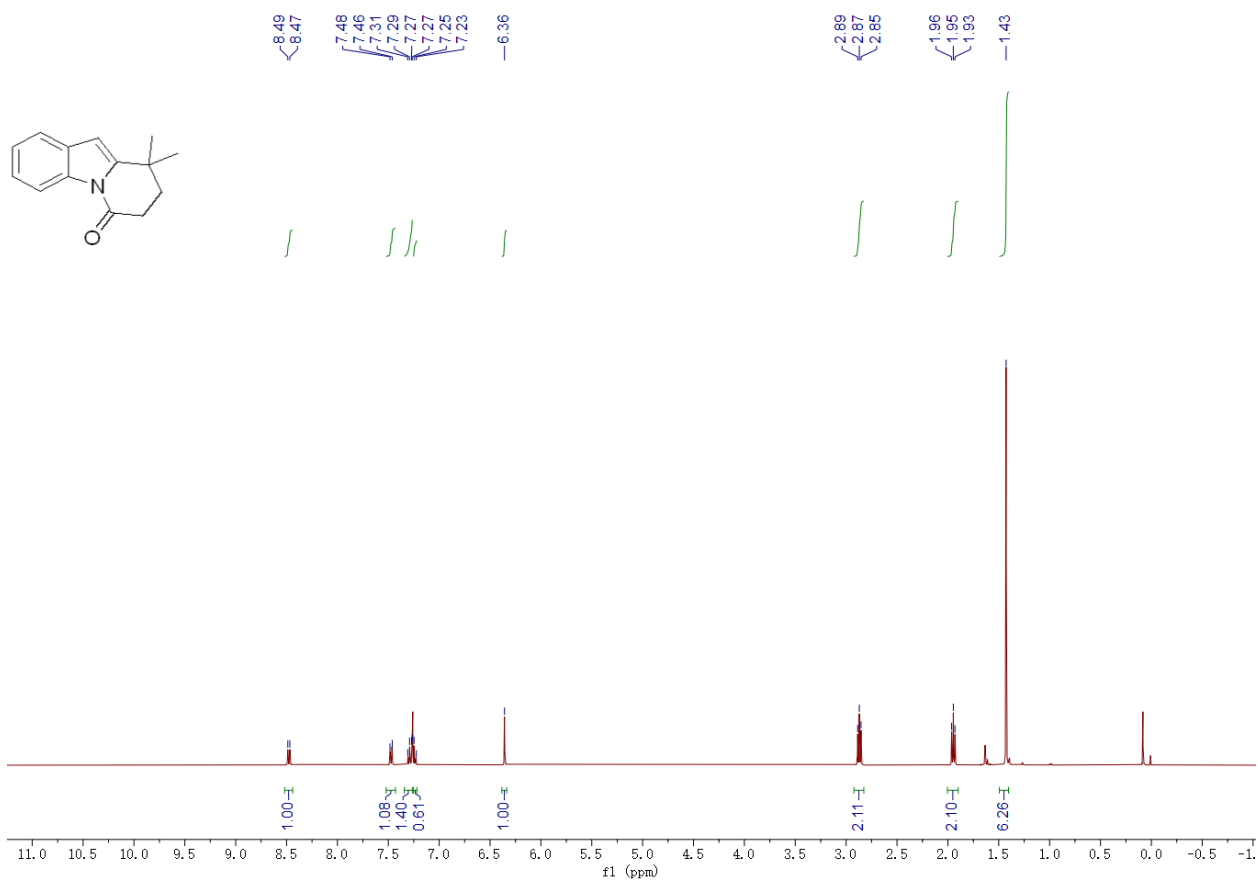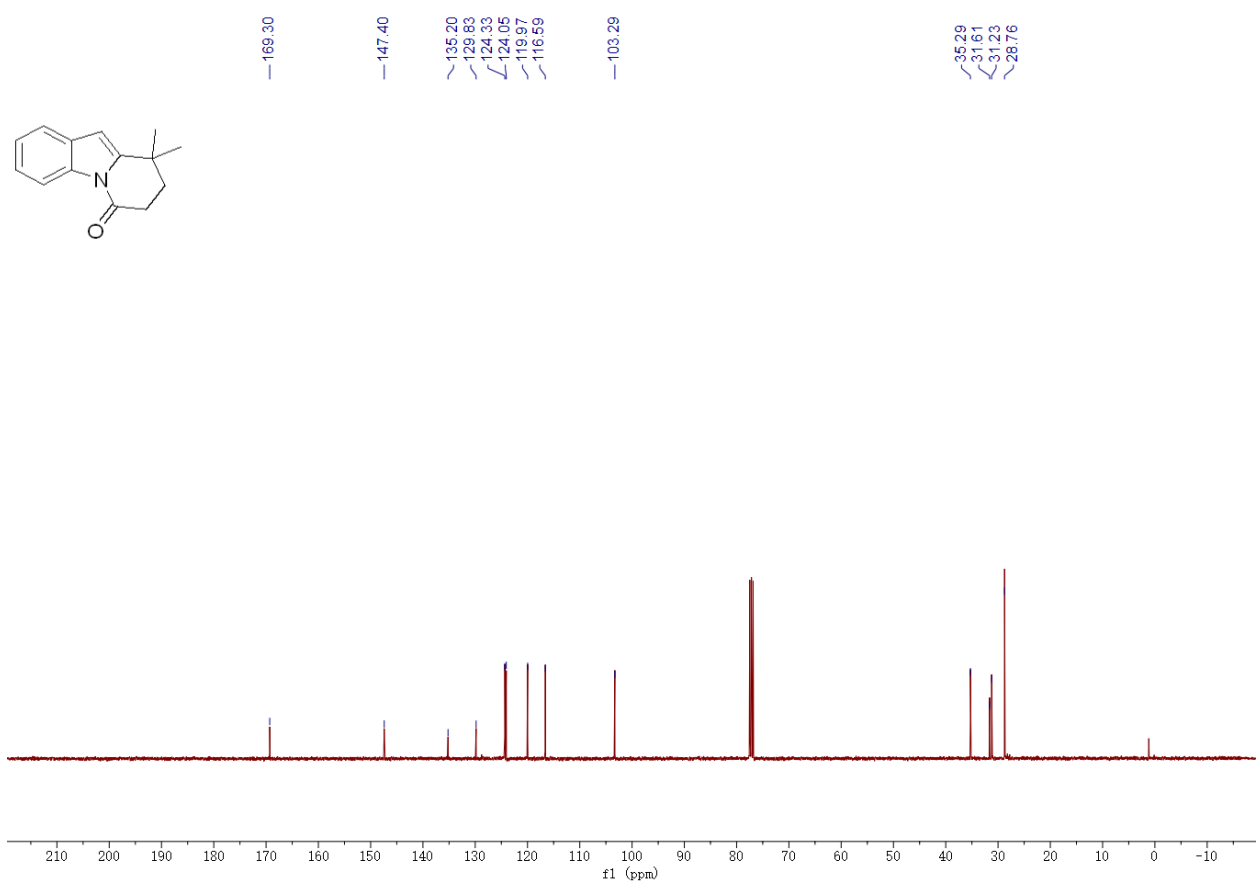

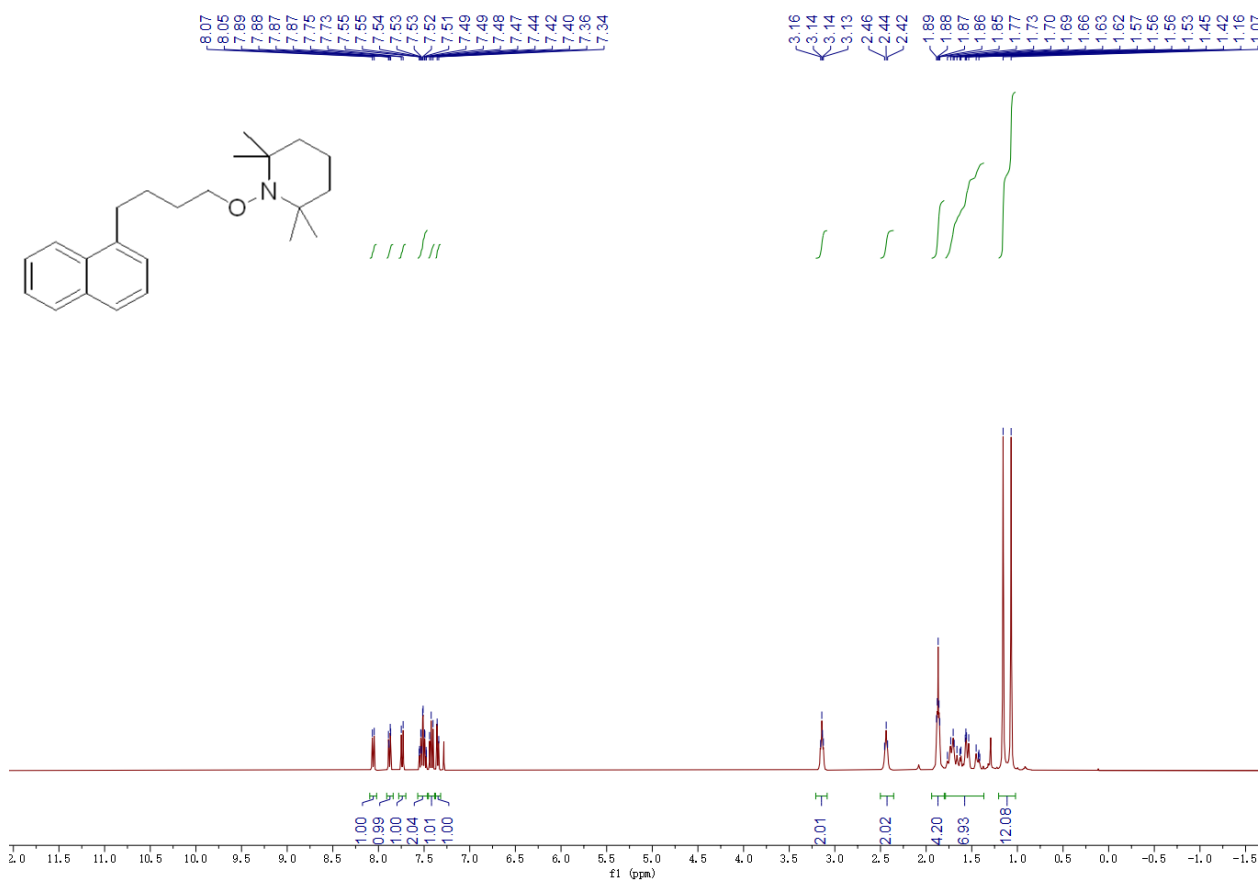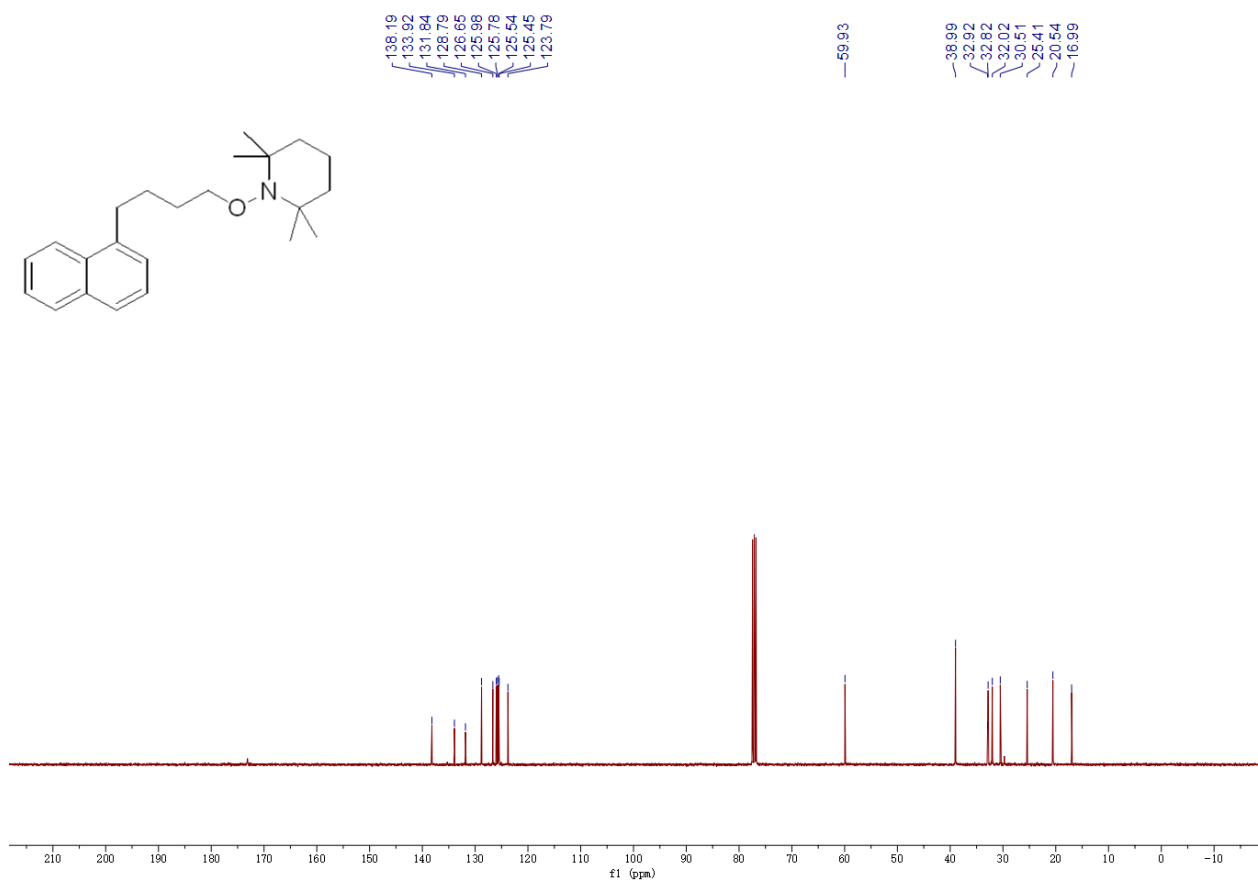

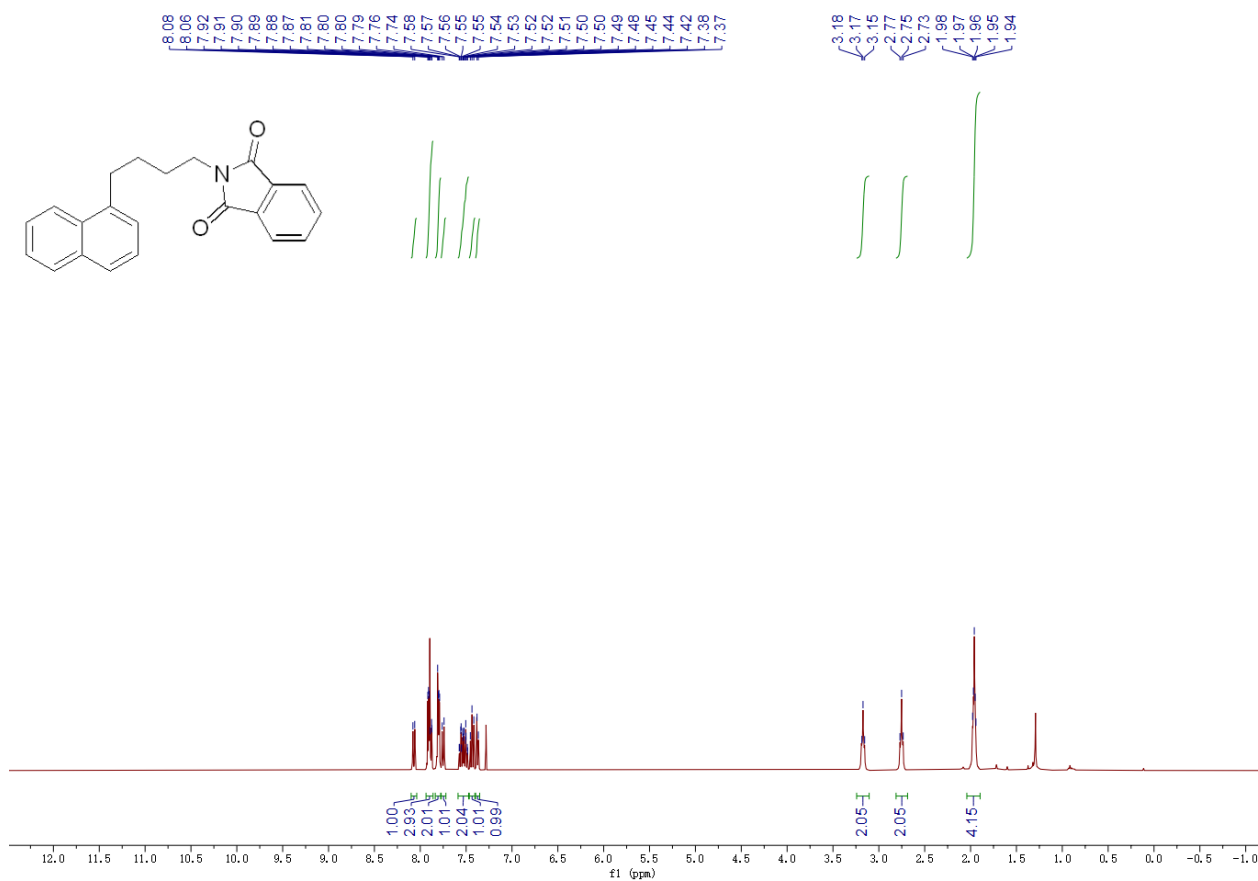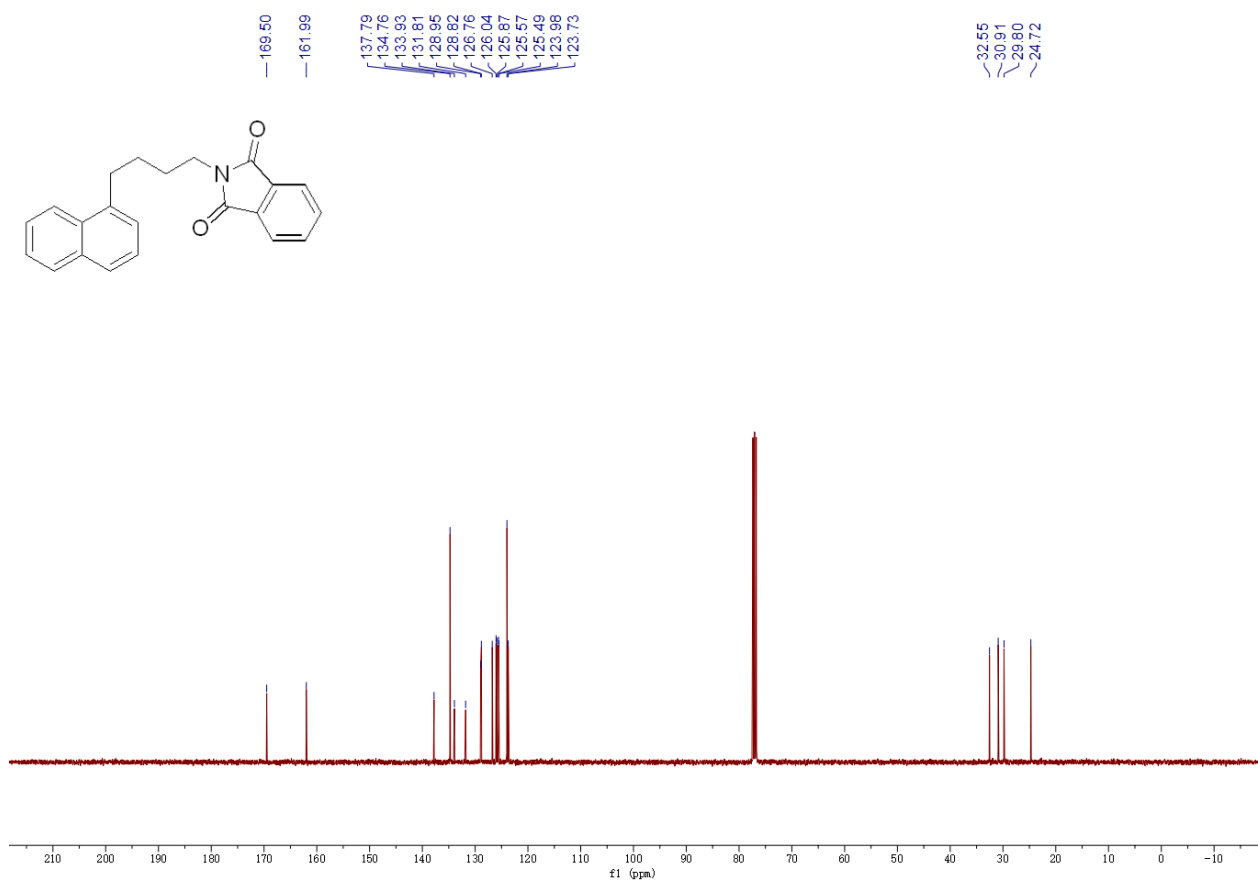



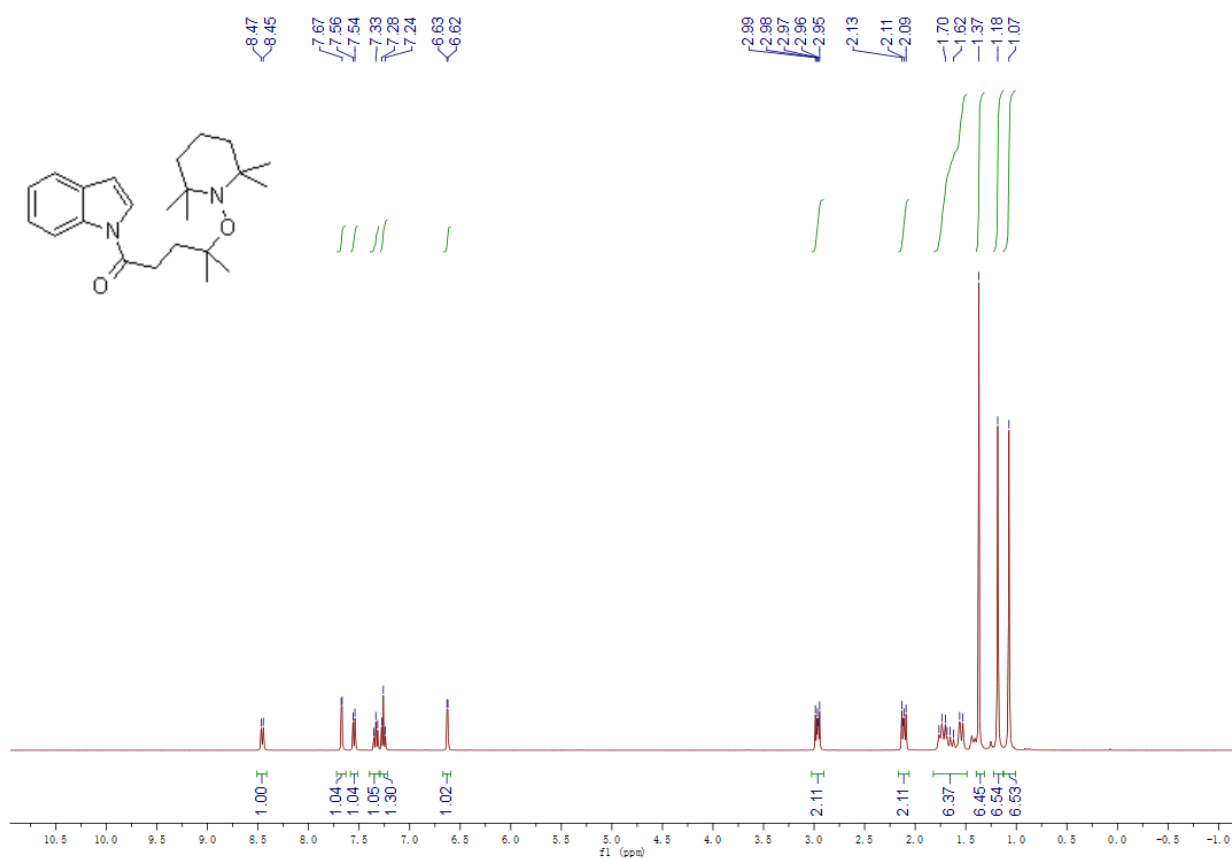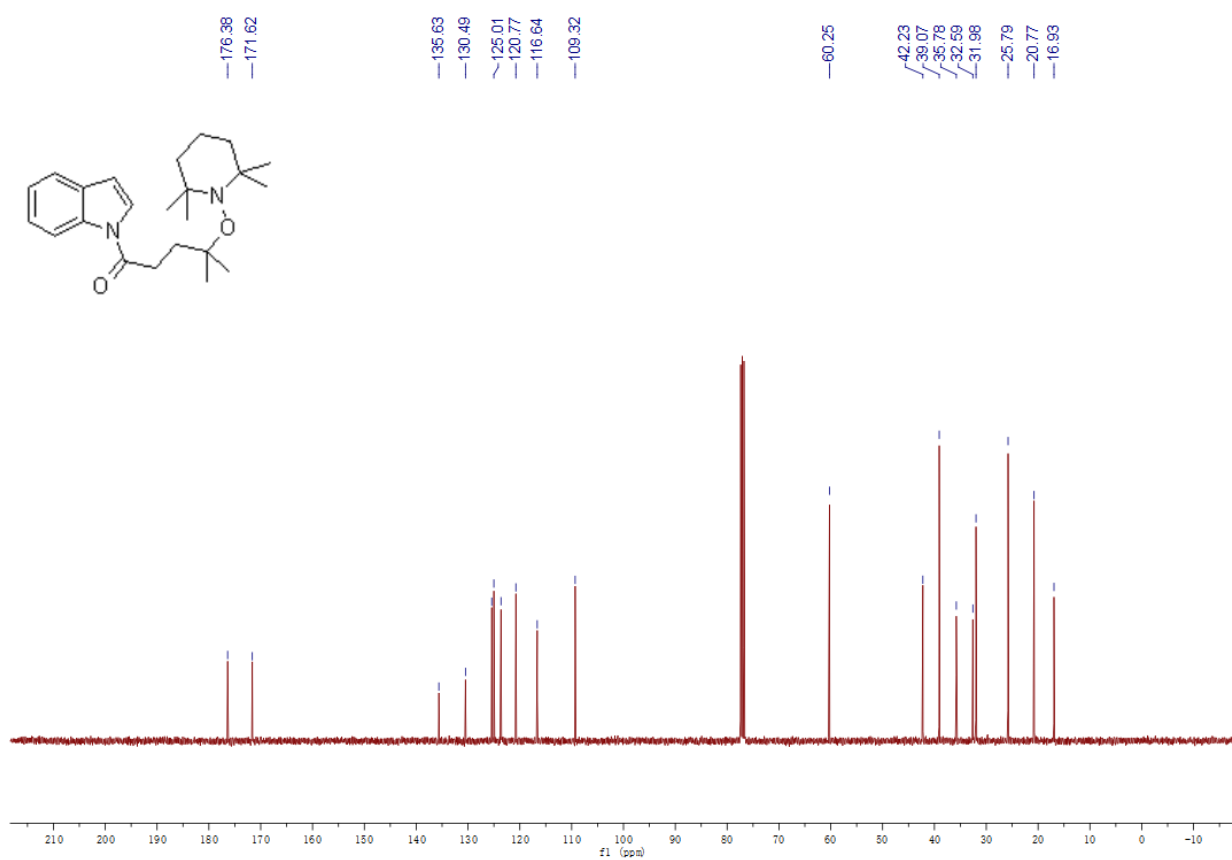

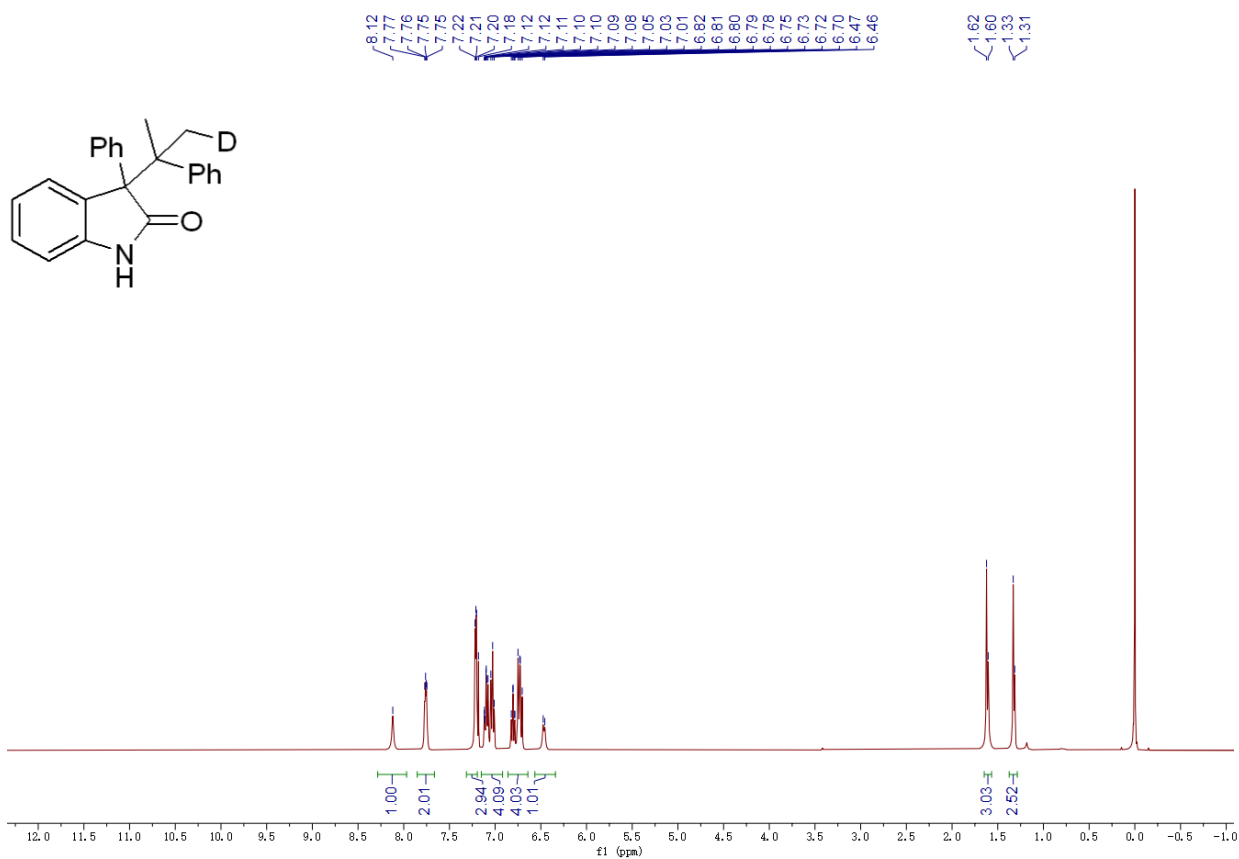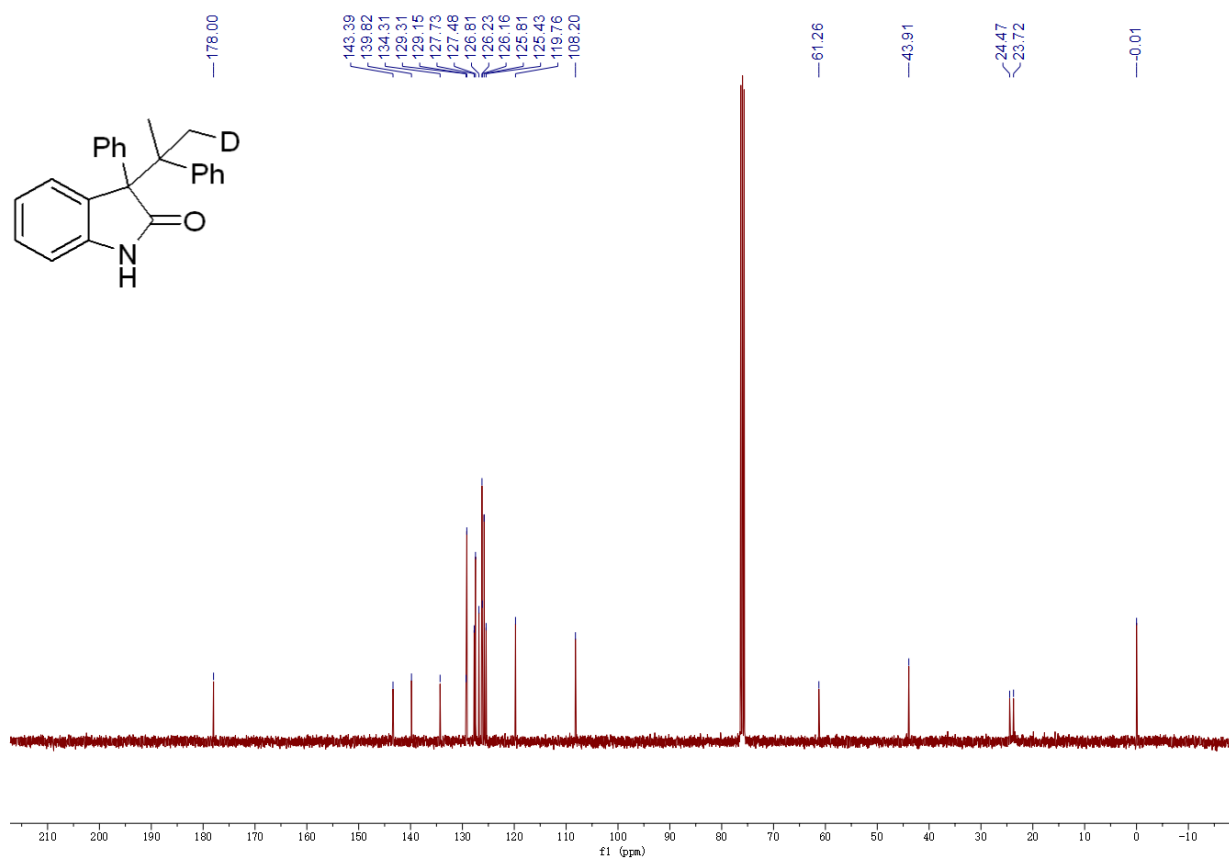

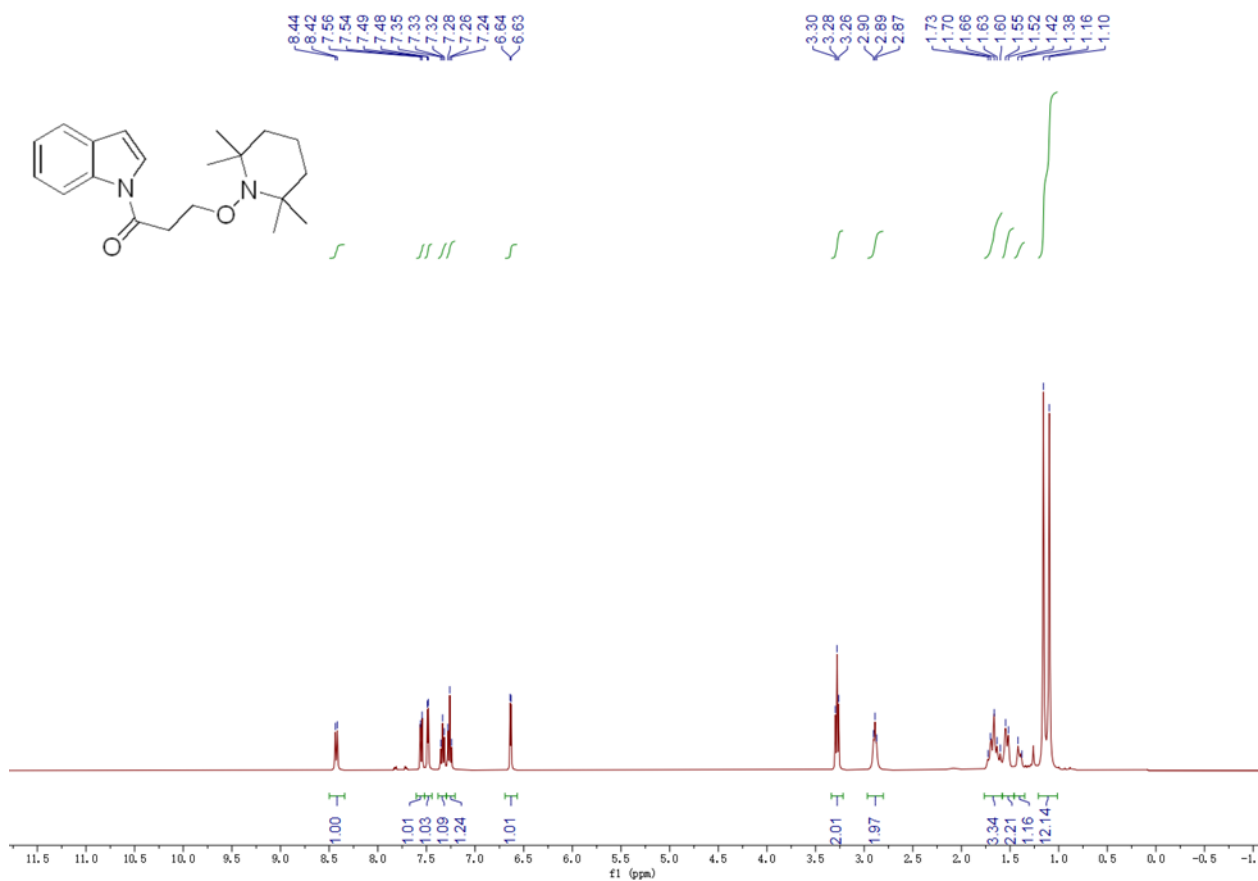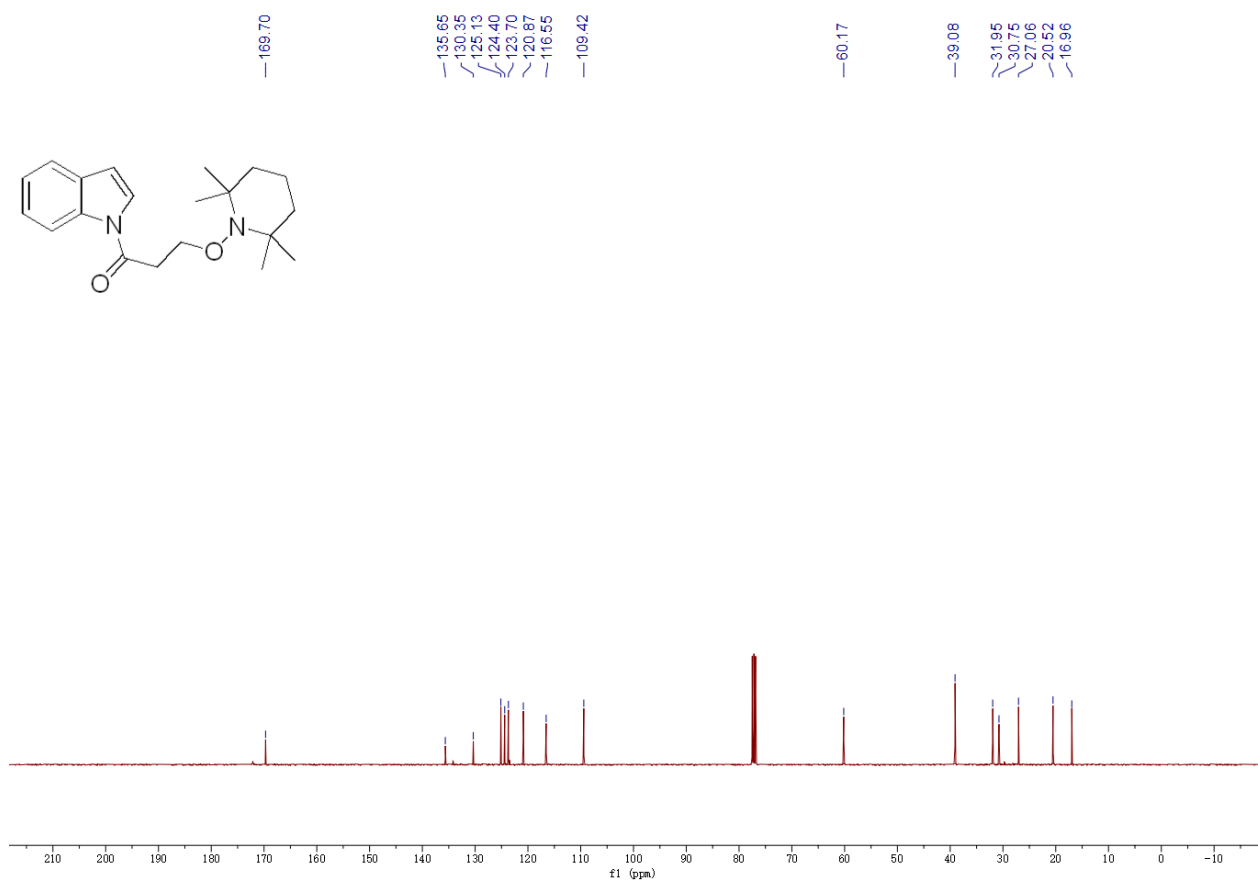

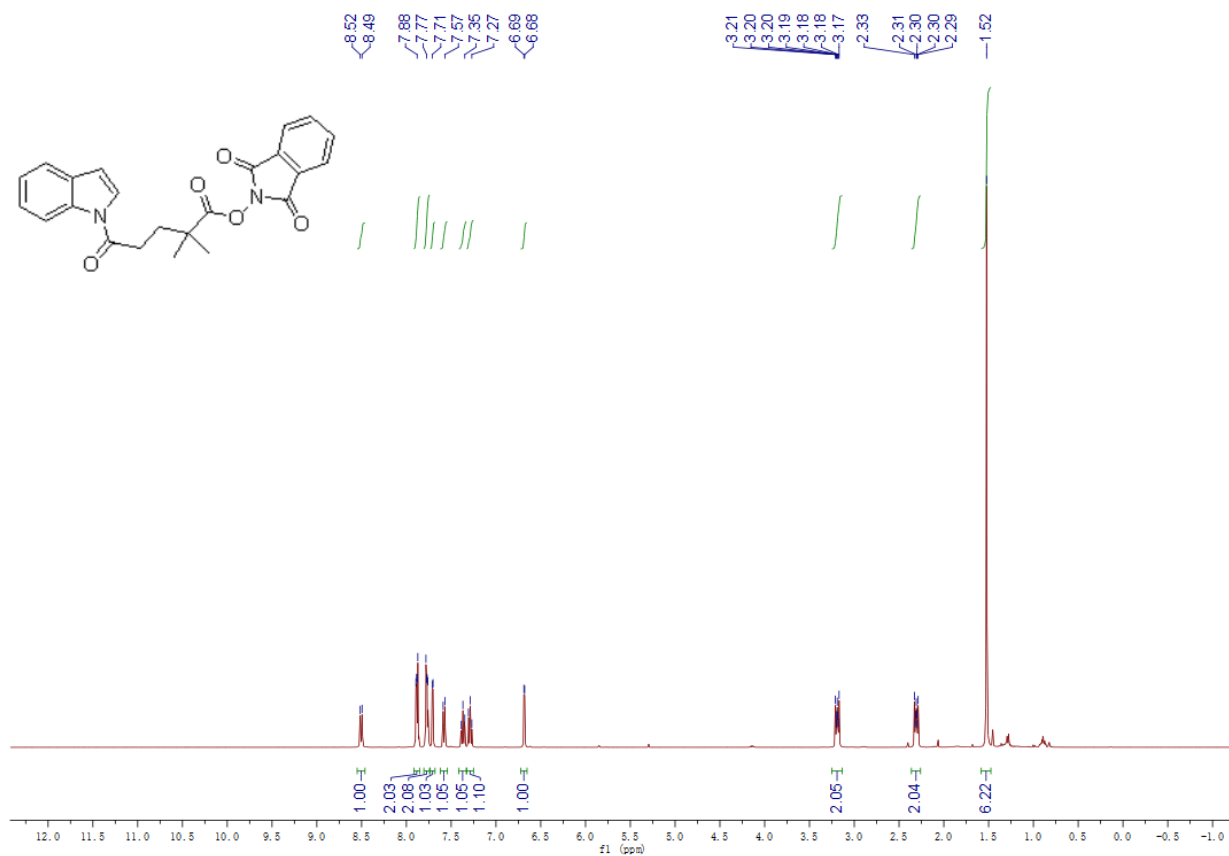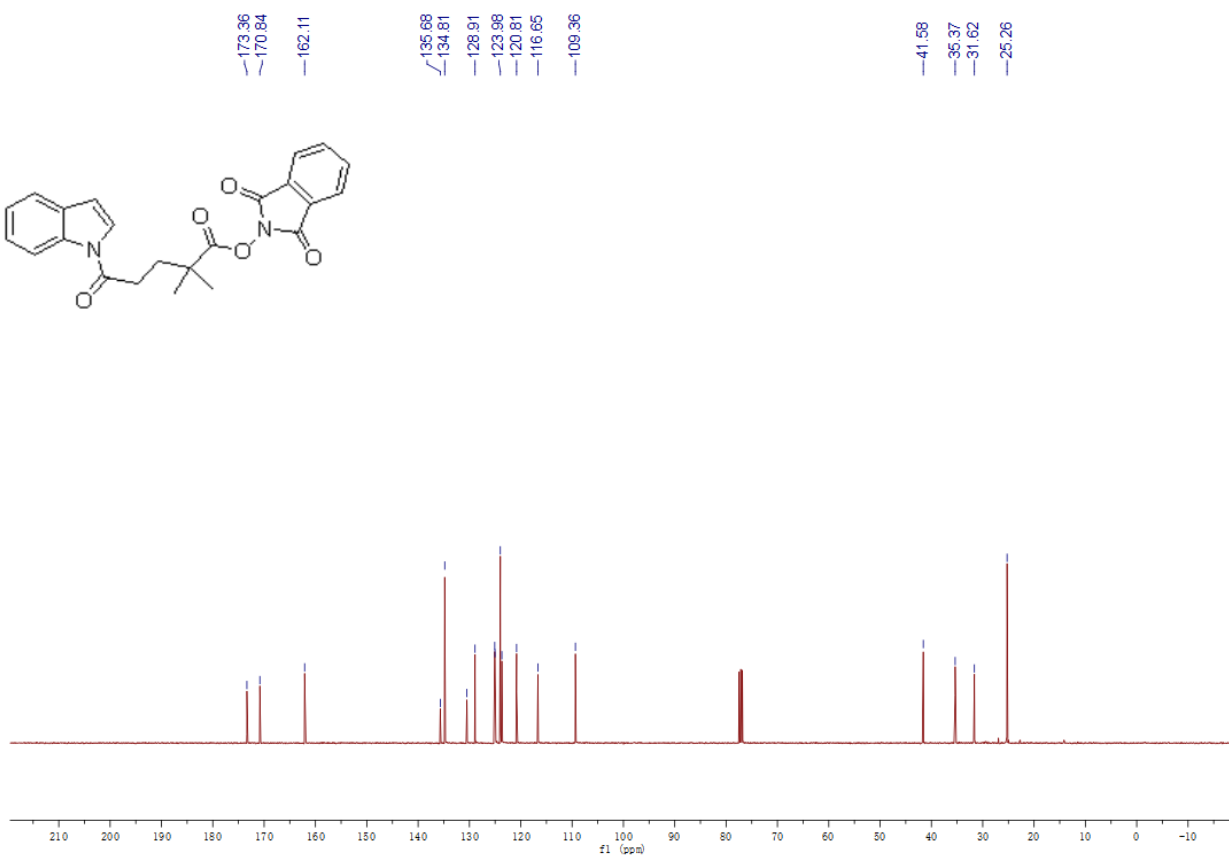

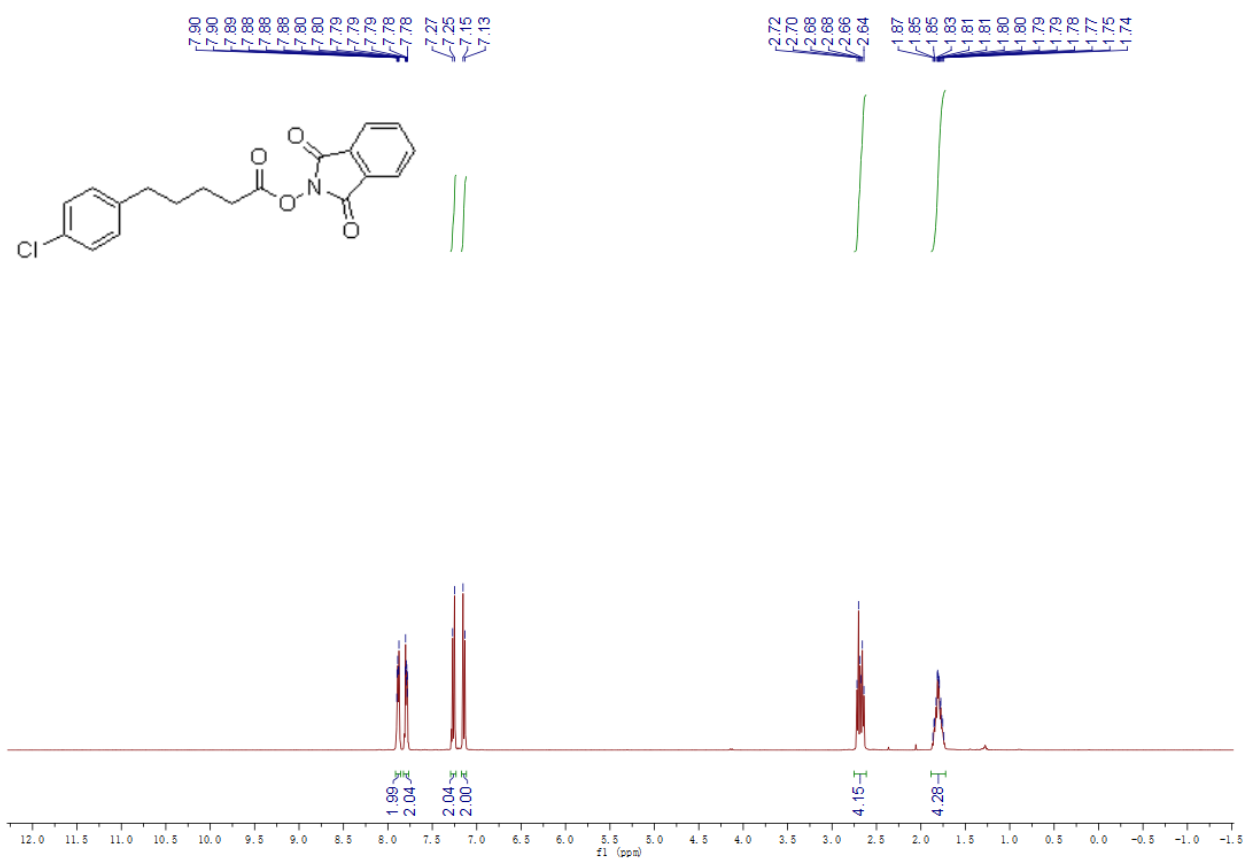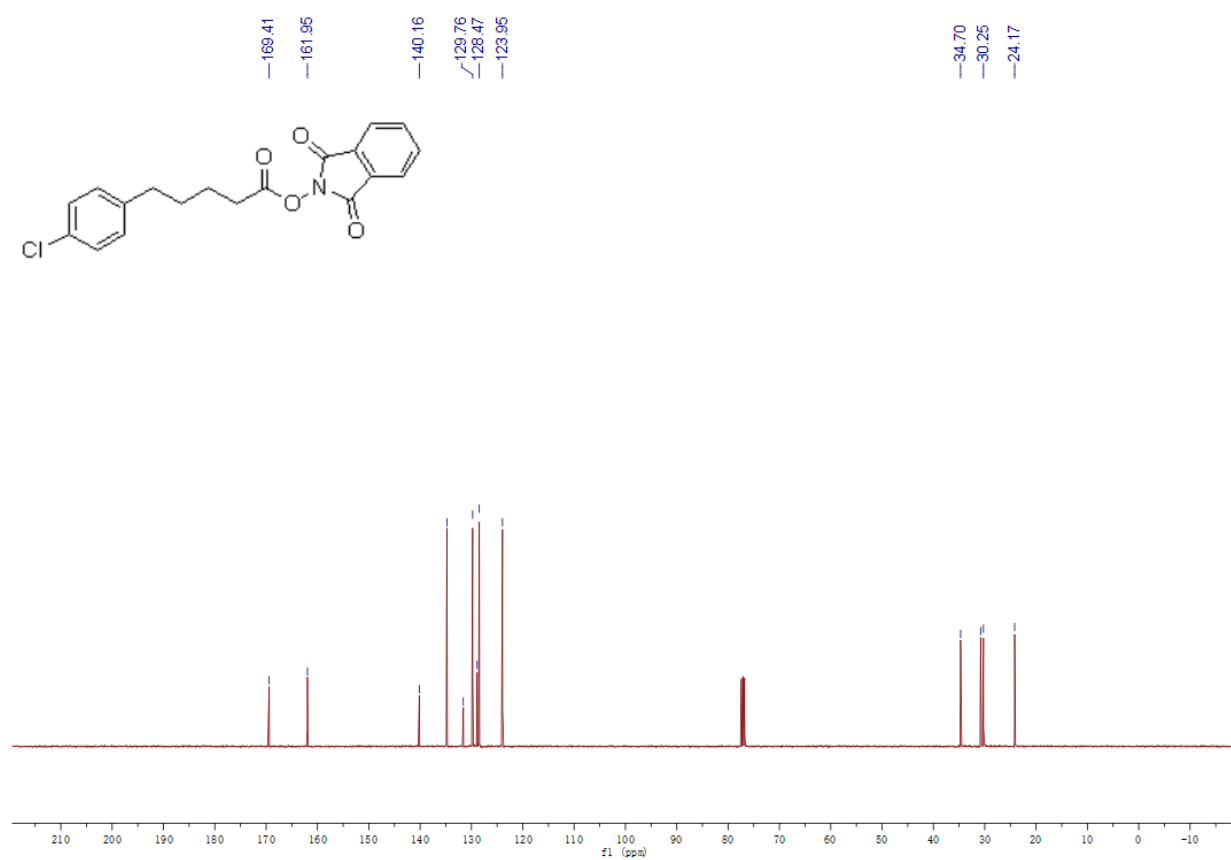

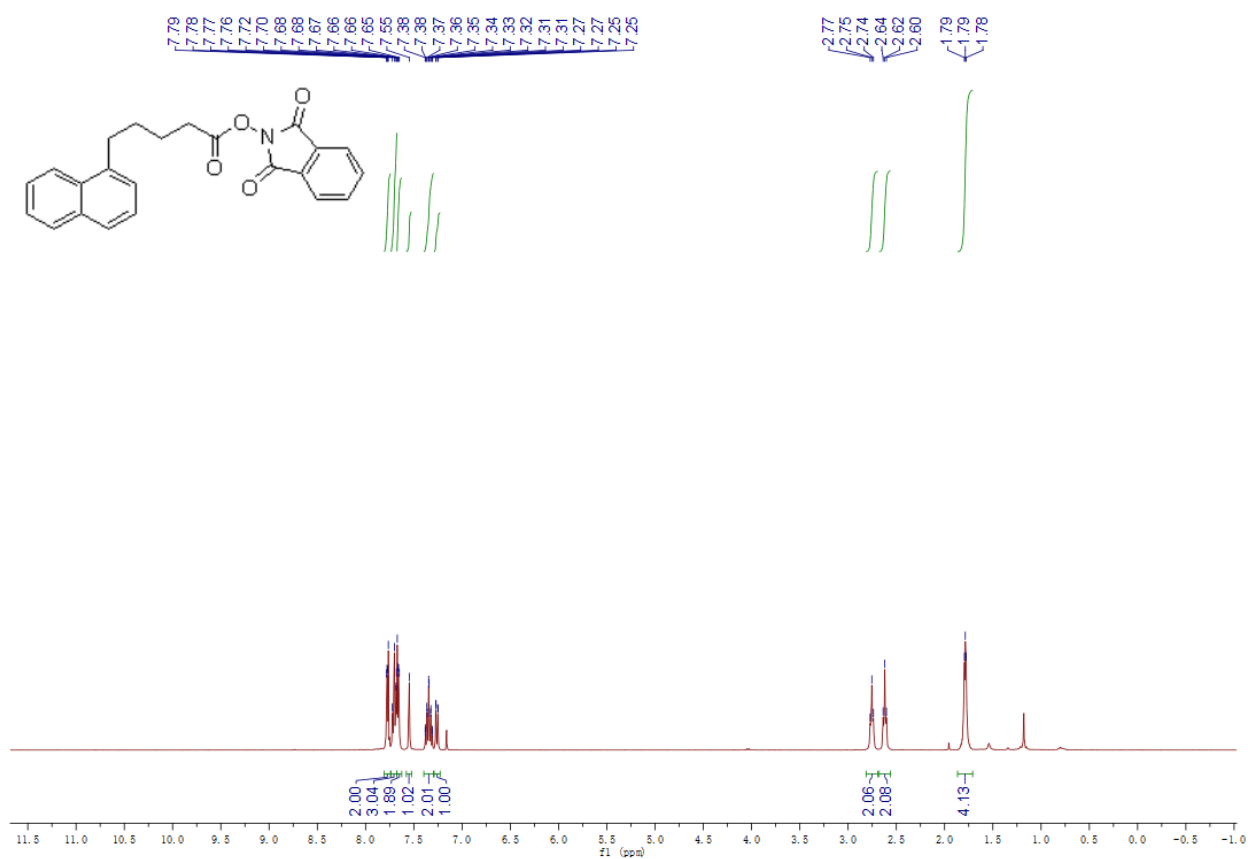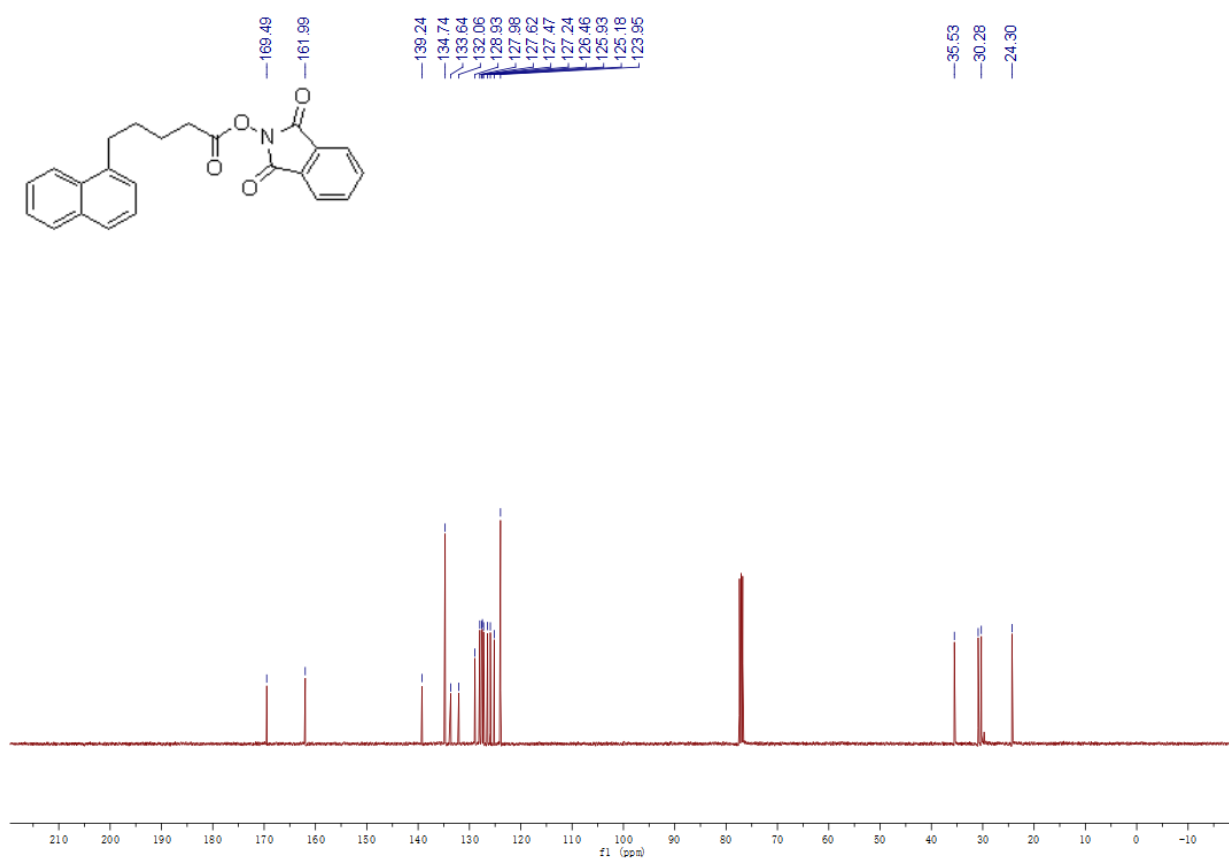

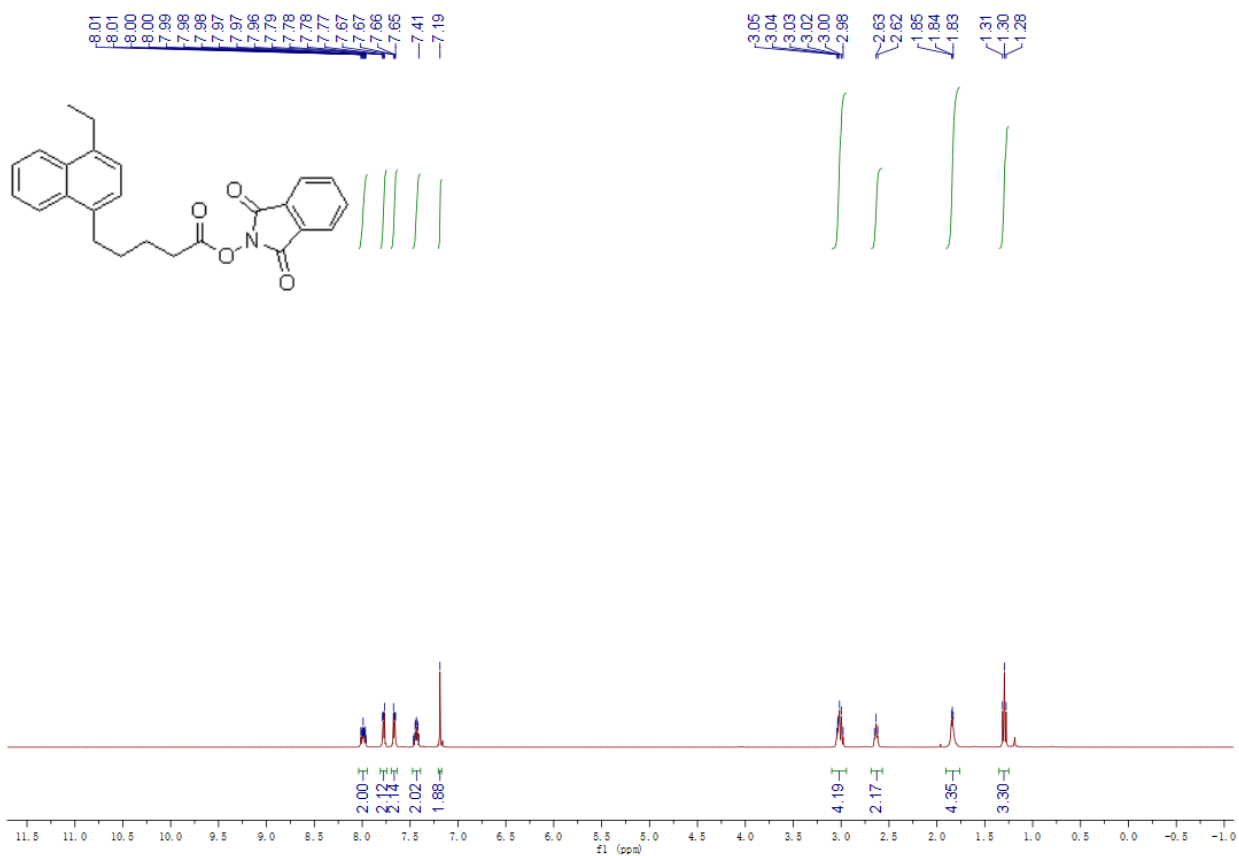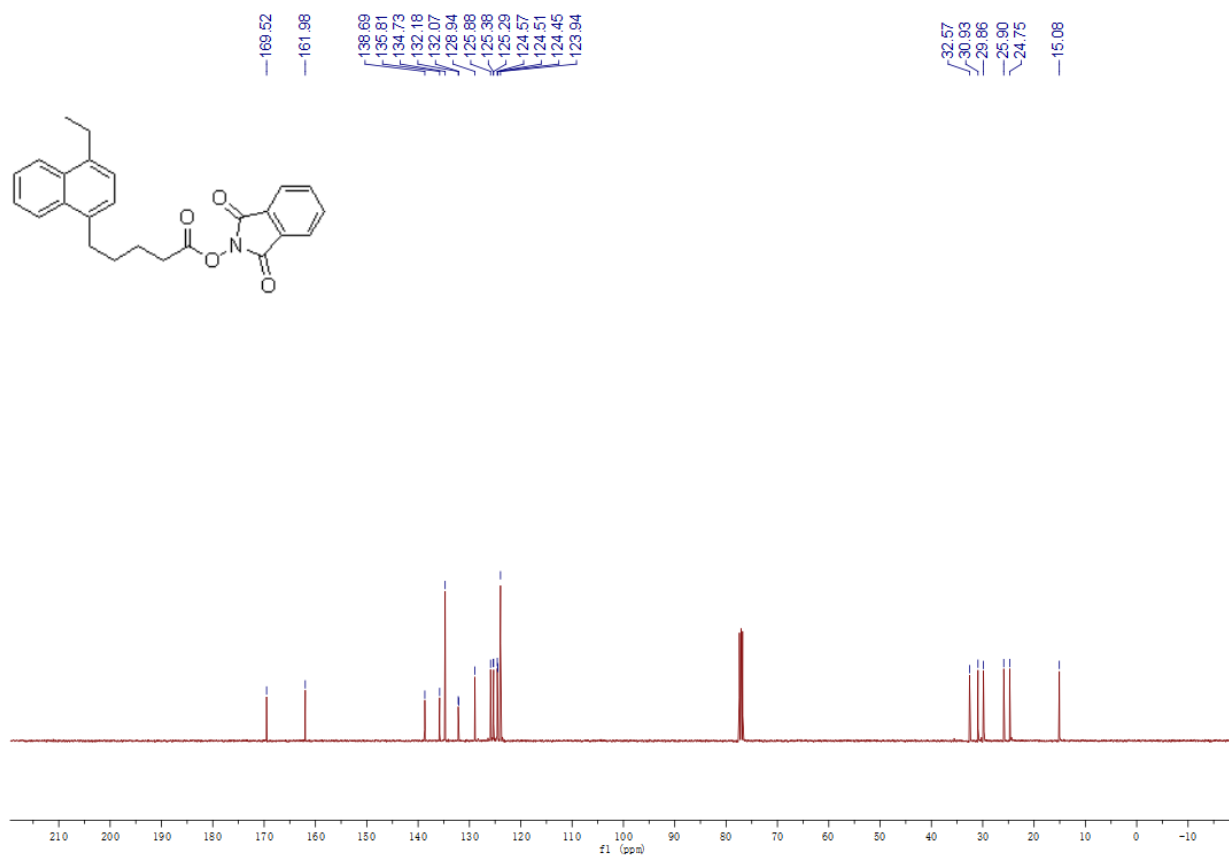

## 10 References

1. J. Wang, M. Shang, H. Lundberg, K. S. Feu, S. J. Hecker, T. Qin, D. G. Blackmond, P. S. Baran, *ACS Catal.* **2018**, *8*, 9537-9542.
2. J. T. Xia, X. P. Hu, *Org. Lett.* **2020**, *22*, 1102-1107.
3. M. Zhou, E. He, L. Zhang, J. Chen, Z. Zhang, Y. Liu, W. Zhang, *Org. Chem.Front.* **2019**, *6*, 3969-3972.
4. Sheldrick, G. M. *Acta Cryst.* **2008**, *A64*, 112–122.
5. Sheldrick, G. M. *Acta Cryst.* **2015**, *A71*, 3–8.
6. Sheldrick, G. M. *Acta Cryst.* **2015**, *C71*, 3–8.
7. Dolomanov, O.V., Bourhis, L.J., Gildea, R.J., Howard, J. A. K., Puschmann, H. *J. Appl. Cryst.* **2009**, *42*, 339-341.
8. Spek, A. L. *J. Appl. Cryst.* **2003**, *36*, 7–13.
